# Supplementary material for: Leaf Proteomic Analysis in Two Maize Landraces With Different Tolerance to Boron Toxicity
Source: Preprints.org preprint supplement (doi:10.20944/preprints202305.0301.v1), 2023-05-05
Supplement: Supplementary file 2 [file supplementary]

## Sheet: S1a-Dataset
Supplemental Table S1a. Dataset of proteins identified by shotgun-DDA analysis					LFQ (label free quantification)
					P0.05				P10				S0.05				S10
Accession|Description	Score	Sequence coverage [%]	Unique peptides	Peptides	Sample 1	Sample 2	Sample 3	Sample 4	Sample 1	Sample 2	Sample 3	Sample 4	Sample 1	Sample 2	Sample 3	Sample 4	Sample 1	Sample 2	Sample 3	Sample 4	GOBP name	GOMF name	GOCC name	Razor + unique peptides	Unique + razor sequence coverage [%]	Unique sequence coverage [%]	Mol. weight [kDa]	Intensity	MS/MS count
tr|A0A060D777|A0A060D777_MAIZE GATA transcription factor 24 (Fragment) OS=Zea mays OX=4577 GN=ZIM36 PE=2 SV=1;tr|A0A1D6GUV7|A0A1D6GUV7_MAIZE GATA transcription factor 24 OS=Zea mays OX=4577 GN=100277669 PE=4 SV=1;tr|A0A1D6GUV9|A0A1D6GUV9_MAIZE GATA transcr	3.0863	19	3	3	NaN	NaN	NaN	NaN	NaN	NaN	NaN	NaN	NaN	NaN	NaN	21.6562	NaN	NaN	NaN	NaN		binding;cation binding;DNA binding;ion binding;metal ion binding;nucleic acid binding;nucleic acid binding transcription factor activity;sequence-specific DNA binding;sequence-specific DNA binding transcription factor activity;transition metal ion binding;zinc ion binding		3	19	19	38.002	68581000	7
tr|A0A096PQR7|A0A096PQR7_MAIZE Cytochrome P450 CYP74A19 OS=Zea mays OX=4577 GN=100279433 PE=4 SV=1	6.9217	42.3	3	17	NaN	NaN	NaN	NaN	NaN	NaN	NaN	NaN	NaN	NaN	NaN	NaN	NaN	NaN	23.5909	NaN		binding;catalytic activity;cation binding;heme binding;ion binding;iron ion binding;metal ion binding;oxidoreductase activity;oxidoreductase activity, acting on paired donors, with incorporation or reduction of molecular oxygen;tetrapyrrole binding;transition metal ion binding		3	12.7	12.7	53.052	90979000	9
tr|A0A1D6HZI0|A0A1D6HZI0_MAIZE RNA-binding protein CP31B chloroplastic OS=Zea mays OX=4577 GN=ZEAMMB73_Zm00001d019648 PE=4 SV=1	323.31	45.5	19	20	32.3949	27.0915	29.0944	29.0052	29.2544	25.7663	32.7889	30.0898	21.5927	28.6642	28.7896	31.786	30.7462	29.7327	31.3003	30.273				20	45.5	43.1	40.013	24998000000	259
tr|A0A096PTJ8|A0A096PTJ8_MAIZE RNA-binding protein 1 OS=Zea mays OX=4577 GN=103631917 PE=4 SV=1	37.093	16.6	4	6	23.1188	NaN	22.9101	NaN	NaN	NaN	NaN	NaN	NaN	NaN	23.0237	NaN	NaN	NaN	NaN	NaN		binding;nucleic acid binding;nucleotide binding		6	16.6	9.9	40.579	333410000	32
tr|A0A096QP96|A0A096QP96_MAIZE Blue copper protein OS=Zea mays OX=4577 GN=541713 PE=4 SV=1	66.182	15.8	2	2	22.5871	NaN	NaN	22.3546	NaN	NaN	22.8397	NaN	NaN	NaN	NaN	NaN	NaN	NaN	NaN	NaN		electron carrier activity		2	15.8	15.8	15.608	152880000	16
tr|A0A1D6LDT8|A0A1D6LDT8_MAIZE RING-type E3 ubiquitin transferase OS=Zea mays OX=4577 GN=100501378 PE=4 SV=1;tr|A0A1D6LDT5|A0A1D6LDT5_MAIZE RING-type E3 ubiquitin transferase OS=Zea mays OX=4577 GN=100501378 PE=4 SV=1;tr|A0A096QRZ7|A0A096QRZ7_MAIZE RING-ty	19.841	11.3	4	4	NaN	NaN	22.1498	NaN	NaN	NaN	NaN	NaN	NaN	NaN	NaN	NaN	NaN	NaN	NaN	NaN		acid-amino acid ligase activity;catalytic activity;ligase activity;ligase activity, forming carbon-nitrogen bonds;small conjugating protein ligase activity;ubiquitin-protein ligase activity		4	11.3	11.3	73.276	162420000	21
tr|A0A096QXB7|A0A096QXB7_MAIZE Annexin OS=Zea mays OX=4577 GN=Ann7 PE=2 SV=1	26.467	32.9	7	8	NaN	23.3584	NaN	NaN	NaN	24.4524	NaN	NaN	24.032	NaN	NaN	23.7198	NaN	NaN	NaN	NaN		binding;calcium ion binding;calcium-dependent phospholipid binding;cation binding;ion binding;lipid binding;metal ion binding;phospholipid binding		7	30.6	30.6	38.25	361730000	20
tr|A0A1D6M5H3|A0A1D6M5H3_MAIZE Polypyrimidine tract-binding protein homolog 3 OS=Zea mays OX=4577 GN=100383701 PE=4 SV=1;tr|A0A096R0K1|A0A096R0K1_MAIZE Polypyrimidine tract-binding protein homolog 3 OS=Zea mays OX=4577 GN=100383701 PE=4 SV=1;tr|A0A1D6FPM1|	8.1797	18	5	5	NaN	NaN	22.2742	NaN	NaN	NaN	NaN	NaN	NaN	NaN	NaN	NaN	NaN	NaN	NaN	NaN	cellular macromolecule metabolic process;cellular metabolic process;cellular nitrogen compound metabolic process;cellular process;macromolecule metabolic process;metabolic process;mRNA metabolic process;mRNA processing;nitrogen compound metabolic process;nucleic acid metabolic process;nucleobase-containing compound metabolic process;primary metabolic process;RNA metabolic process;RNA processing	binding;nucleic acid binding;nucleotide binding;RNA binding	cell part;intracellular membrane-bounded organelle;intracellular organelle;intracellular part;membrane-bounded organelle;nucleus;organelle	5	18	18	36.421	133930000	16
tr|Q9LKL4|Q9LKL4_MAIZE Lipoxygenase OS=Zea mays OX=4577 GN=LOX PE=2 SV=1;tr|A0A1D6N531|A0A1D6N531_MAIZE Lipoxygenase OS=Zea mays OX=4577 GN=541856 PE=3 SV=1;tr|A0A1D6N534|A0A1D6N534_MAIZE Lipoxygenase OS=Zea mays OX=4577 GN=541856 PE=3 SV=1;tr|A0A1D6N535|A	323.31	71.4	43	61	23.1566	21.4284	25.4164	22.8437	25.0084	22.2681	NaN	NaN	21.8728	25.6835	26.0095	22.556	26.6752	NaN	25.666	NaN	biosynthetic process;carboxylic acid biosynthetic process;carboxylic acid metabolic process;cellular biosynthetic process;cellular ketone metabolic process;cellular lipid metabolic process;cellular metabolic process;cellular process;fatty acid biosynthetic process;fatty acid metabolic process;lipid biosynthetic process;lipid metabolic process;metabolic process;monocarboxylic acid metabolic proces…	binding;catalytic activity;cation binding;dioxygenase activity;ion binding;metal ion binding;oxidoreductase activity;oxidoreductase activity, acting on single donors with incorporation of molecular oxygen;oxidoreductase activity, acting on single donors with incorporation of molecular oxygen, incorporation of two atoms of oxygen		44	58.6	57.5	98.163	14200000000	540
tr|A0A096RFR6|A0A096RFR6_MAIZE Eukaryotic translation initiation factor 3 subunit A OS=Zea mays OX=4577 GN=542747 PE=3 SV=1;tr|A0A1D6MHU9|A0A1D6MHU9_MAIZE Eukaryotic translation initiation factor 3 subunit A OS=Zea mays OX=4577 GN=542747 PE=3 SV=1;sp|Q9XHR	140.67	43.3	2	44	NaN	NaN	NaN	NaN	24.2042	NaN	23.813	23.5976	NaN	NaN	NaN	NaN	NaN	NaN	NaN	NaN	biological regulation;cellular component assembly;cellular component assembly at cellular level;cellular component organization;cellular component organization at cellular level;cellular component organization or biogenesis;cellular component organization or biogenesis at cellular level;cellular macromolecular complex assembly;cellular macromolecular complex subunit organization;cellular process;…	binding;nucleic acid binding;RNA binding;translation factor activity, nucleic acid binding;translation initiation factor activity	cell part;cytoplasmic part;eukaryotic 43S preinitiation complex;eukaryotic 48S preinitiation complex;eukaryotic translation initiation factor 3 complex;intracellular part;macromolecular complex;protein complex;ribonucleoprotein complex;translation preinitiation complex	44	43.3	1.6	111.83	379530000	43
tr|A0A1D6JHK7|A0A1D6JHK7_MAIZE Methylthioribose kinase OS=Zea mays OX=4577 GN=ZEAMMB73_Zm00001d026573 PE=3 SV=1	323.31	61.3	30	30	22.5412	24.2898	23.8811	22.3785	21.6289	24.0352	23.5333	23.1794	24.4354	21.7952	21.6546	21.6065	24.5017	24.4278	24.1181	24.899				30	61.3	61.3	51.831	12264000000	261
tr|A0A096SC75|A0A096SC75_MAIZE Dentin sialophosphoprotein-related OS=Zea mays OX=4577 GN=103647958 PE=4 SV=1	30.639	18.6	6	6	NaN	NaN	NaN	NaN	NaN	NaN	23.2733	23.1576	NaN	NaN	NaN	NaN	NaN	NaN	NaN	NaN	biological regulation;regulation of biological process;regulation of biosynthetic process;regulation of cellular biosynthetic process;regulation of cellular macromolecule biosynthetic process;regulation of cellular metabolic process;regulation of cellular process;regulation of gene expression;regulation of macromolecule biosynthetic process;regulation of macromolecule metabolic process;regulation…	binding;DNA binding;nucleic acid binding		6	18.6	18.6	61.932	247280000	31
tr|A0A096SGQ3|A0A096SGQ3_MAIZE Amine oxidase OS=Zea mays OX=4577 GN=100383438 PE=3 SV=1;tr|A0A1D6E8H3|A0A1D6E8H3_MAIZE Amine oxidase OS=Zea mays OX=4577 GN=100383438 PE=3 SV=1	21.554	20.8	9	9	NaN	NaN	NaN	22.8005	24.1825	NaN	23.3661	NaN	NaN	NaN	NaN	NaN	NaN	NaN	NaN	NaN	amine metabolic process;metabolic process;nitrogen compound metabolic process	binding;catalytic activity;cation binding;cofactor binding;copper ion binding;ion binding;metal ion binding;oxidoreductase activity;oxidoreductase activity, acting on the CH-NH2 group of donors;oxidoreductase activity, acting on the CH-NH2 group of donors, oxygen as acceptor;primary amine oxidase activity;quinone binding;transition metal ion binding	cell part;cytoplasmic part;intracellular membrane-bounded organelle;intracellular organelle;intracellular part;membrane-bounded organelle;microbody;organelle;peroxisome	9	20.8	20.8	86.434	595910000	35
tr|A0A096T0J9|A0A096T0J9_MAIZE Protein CDC73-like protein OS=Zea mays OX=4577 GN=103626013 PE=4 SV=1	1.9816	7.4	2	2	NaN	22.3277	NaN	NaN	NaN	NaN	NaN	NaN	NaN	NaN	NaN	NaN	NaN	NaN	NaN	21.7668	biological regulation;cellular component organization;cellular component organization at cellular level;cellular component organization or biogenesis;cellular component organization or biogenesis at cellular level;cellular macromolecule metabolic process;cellular metabolic process;cellular process;cellular protein metabolic process;chromatin modification;chromatin organization;chromosome organiza…		cell part;intracellular membrane-bounded organelle;intracellular organelle;intracellular part;membrane-bounded organelle;nucleus;organelle	2	7.4	7.4	42.253	103700000	14
tr|A0A1D6H0P5|A0A1D6H0P5_MAIZE Splicing factor 3B subunit 1 OS=Zea mays OX=4577 GN=100277544 PE=4 SV=1;tr|A0A096TMV3|A0A096TMV3_MAIZE Splicing factor 3B subunit 1 OS=Zea mays OX=4577 GN=100277544 PE=4 SV=1;tr|A0A1D6H0Q8|A0A1D6H0Q8_MAIZE Splicing factor 3B	28.163	8.6	2	7	NaN	NaN	NaN	NaN	NaN	NaN	NaN	20.4591	20.0884	NaN	NaN	NaN	NaN	NaN	NaN	NaN				7	8.6	2.3	139.39	24068000	5
tr|C0PIQ4|C0PIQ4_MAIZE ACT domain-containing protein ACR12 OS=Zea mays OX=4577 GN=100383740 PE=2 SV=1;tr|A0A1D6DQ74|A0A1D6DQ74_MAIZE Uncharacterized protein OS=Zea mays OX=4577 GN=103649523 PE=4 SV=1;tr|A0A1X7YEQ6|A0A1X7YEQ6_MAIZE Uncharacterized protein O	51.611	36.3	4	8	23.1914	23.6442	NaN	NaN	NaN	NaN	22.466	NaN	22.764	NaN	NaN	23.6998	NaN	NaN	NaN	NaN	metabolic process	amine binding;amino acid binding;binding;carboxylic acid binding		8	36.3	15.2	29.751	196470000	21
tr|A0A1D6DSQ7|A0A1D6DSQ7_MAIZE AT-hook motif nuclear-localized protein 5 OS=Zea mays OX=4577 GN=100194172 PE=4 SV=1;tr|A0A1D6DSQ8|A0A1D6DSQ8_MAIZE AT-hook motif nuclear-localized protein 5 OS=Zea mays OX=4577 GN=100194172 PE=4 SV=1	1.5801	17.9	2	4	23.5656	NaN	NaN	NaN	NaN	NaN	NaN	NaN	NaN	NaN	NaN	NaN	NaN	NaN	NaN	NaN				2	10.8	10.8	39.507	64166000	5
tr|A0A1D6DT56|A0A1D6DT56_MAIZE NADPH-protochlorophyllide oxidoreductase OS=Zea mays OX=4577 GN=100194154 PE=3 SV=1	8.9089	35.9	5	11	24.0768	24.6582	24.0975	NaN	NaN	NaN	NaN	NaN	24.1781	23.9882	NaN	24.7389	NaN	NaN	24.8577	NaN				5	25.1	25.1	41.265	133140000	12
tr|A0A1D6IVI7|A0A1D6IVI7_MAIZE Uncharacterized protein OS=Zea mays OX=4577 GN=ZEAMMB73_Zm00001d023784 PE=4 SV=1;tr|A0A1D6DTF3|A0A1D6DTF3_MAIZE Uncharacterized protein OS=Zea mays OX=4577 GN=ZEAMMB73_Zm00001d001834 PE=4 SV=1;tr|A0A1D6IVJ3|A0A1D6IVJ3_MAIZE U	10.156	15.2	7	7	NaN	NaN	NaN	NaN	NaN	NaN	NaN	NaN	NaN	NaN	NaN	NaN	NaN	23.1913	NaN	NaN				7	15.2	15.2	72.967	200020000	20
tr|A0A1D6DU56|A0A1D6DU56_MAIZE Carboxylesterase SOBER1 OS=Zea mays OX=4577 GN=ZEAMMB73_Zm00001d001903 PE=4 SV=1;tr|A0A1D6DU57|A0A1D6DU57_MAIZE Carboxylesterase SOBER1 OS=Zea mays OX=4577 GN=ZEAMMB73_Zm00001d001903 PE=4 SV=1;tr|A0A1D6DU55|A0A1D6DU55_MAIZE C	4.8637	29.3	3	3	NaN	NaN	23.3124	NaN	NaN	NaN	NaN	NaN	NaN	NaN	NaN	NaN	NaN	NaN	NaN	NaN		catalytic activity;hydrolase activity		3	29.3	29.3	18.261	86750000	7
tr|A0A1D6DVG1|A0A1D6DVG1_MAIZE p-loop containing nucleoside triphosphate hydrolase superfamily protein OS=Zea mays OX=4577 GN=ZEAMMB73_Zm00001d001995 PE=4 SV=1;tr|A0A1D6DVG0|A0A1D6DVG0_MAIZE p-loop containing nucleoside triphosphate hydrolase superfamily p	2.8235	14.8	2	7	NaN	NaN	NaN	NaN	NaN	23.1176	NaN	NaN	NaN	NaN	NaN	NaN	NaN	NaN	NaN	NaN				2	6.1	6.1	51.714	32171000	4
tr|A0A1D6DWG9|A0A1D6DWG9_MAIZE Tetratricopeptide repeat (TPR)-like superfamily protein OS=Zea mays OX=4577 GN=ZEAMMB73_Zm00001d002089 PE=4 SV=1;tr|A0A1D6DWG0|A0A1D6DWG0_MAIZE Tetratricopeptide repeat (TPR)-like superfamily protein OS=Zea mays OX=4577 GN=ZE	5.1715	8.7	4	6	NaN	NaN	NaN	NaN	NaN	NaN	NaN	NaN	23.1533	NaN	23.435	23.2415	24.9356	NaN	22.9546	23.4951				4	6.5	6.5	118.23	103580000	6
tr|A0A1D6DWL5|A0A1D6DWL5_MAIZE 3-oxoacyl-[acyl-carrier-protein] synthase III chloroplastic OS=Zea mays OX=4577 GN=100280714 PE=3 SV=1;tr|B6SKS5|B6SKS5_MAIZE 3-oxoacyl-[acyl-carrier-protein] synthase III chloroplastic OS=Zea mays OX=4577 GN=100280714 PE=2 S	24.482	39	4	9	23.2718	NaN	NaN	NaN	NaN	NaN	NaN	NaN	NaN	NaN	NaN	NaN	NaN	NaN	NaN	NaN	biosynthetic process;carboxylic acid biosynthetic process;carboxylic acid metabolic process;cellular biosynthetic process;cellular ketone metabolic process;cellular lipid metabolic process;cellular metabolic process;cellular process;fatty acid biosynthetic process;fatty acid metabolic process;lipid biosynthetic process;lipid metabolic process;metabolic process;monocarboxylic acid metabolic proces…	3-oxoacyl-[acyl-carrier-protein] synthase activity;catalytic activity;fatty acid synthase activity;transferase activity;transferase activity, transferring acyl groups;transferase activity, transferring acyl groups other than amino-acyl groups		9	39	16.5	34.635	177040000	20
tr|A0A1D6DZF2|A0A1D6DZF2_MAIZE Argonaute2a OS=Zea mays OX=4577 GN=ZEAMMB73_Zm00001d002316 PE=3 SV=1;tr|A0A1D6JEA6|A0A1D6JEA6_MAIZE Argonaute2b OS=Zea mays OX=4577 GN=ZEAMMB73_Zm00001d026300 PE=3 SV=1;tr|A0A1D6JEA5|A0A1D6JEA5_MAIZE Argonaute2b OS=Zea mays O	16.022	11.1	6	6	23.2038	NaN	NaN	NaN	NaN	NaN	NaN	NaN	NaN	NaN	NaN	NaN	NaN	NaN	NaN	NaN				6	11.1	11.1	95.487	253270000	20
tr|A0A1D6DZK3|A0A1D6DZK3_MAIZE Uncharacterized protein OS=Zea mays OX=4577 GN=ZEAMMB73_Zm00001d002325 PE=4 SV=1	19.093	23	2	6	NaN	NaN	22.8013	NaN	23.5804	NaN	NaN	NaN	NaN	NaN	NaN	NaN	NaN	NaN	NaN	NaN				3	10.6	7.7	31.608	88341000	11
tr|B6TKH9|B6TKH9_MAIZE PAP fibrillin family protein OS=Zea mays OX=4577 GN=ZEAMMB73_Zm00001d002384 PE=2 SV=1;tr|A0A1D6E043|A0A1D6E043_MAIZE PAP fibrillin family protein OS=Zea mays OX=4577 GN=ZEAMMB73_Zm00001d002384 PE=4 SV=1	4.1808	15.8	3	3	NaN	25.5303	25.2886	24.808	NaN	24.6805	NaN	NaN	NaN	NaN	NaN	NaN	NaN	NaN	NaN	NaN				3	15.8	15.8	24.02	157020000	8
tr|A0A1D6E530|A0A1D6E530_MAIZE Peroxidase OS=Zea mays OX=4577 GN=ZEAMMB73_Zm00001d002899 PE=3 SV=1	315.49	56.7	16	16	NaN	NaN	NaN	NaN	NaN	NaN	NaN	NaN	NaN	NaN	NaN	25.8525	NaN	NaN	NaN	NaN				16	56.7	56.7	35.476	5549300000	177
tr|A0A1D6E560|A0A1D6E560_MAIZE Tetratricopeptide repeat (TPR)-like superfamily protein OS=Zea mays OX=4577 GN=ZEAMMB73_Zm00001d002919 PE=4 SV=1	47.71	19.2	7	7	NaN	NaN	NaN	NaN	NaN	23.937	NaN	NaN	NaN	NaN	NaN	NaN	NaN	NaN	NaN	NaN				7	19.2	19.2	51.426	330200000	54
tr|A0A1D6E5K1|A0A1D6E5K1_MAIZE Putative methyltransferase PMT25 OS=Zea mays OX=4577 GN=100285199 PE=4 SV=1	9.8803	7.7	2	2	NaN	NaN	NaN	NaN	NaN	NaN	NaN	NaN	NaN	NaN	NaN	NaN	21.6356	NaN	NaN	NaN				2	7.7	7.7	34.995	9430900	5
tr|A0A1D6E5Z0|A0A1D6E5Z0_MAIZE Phenylalanine ammonia-lyase OS=Zea mays OX=4577 GN=100384215 PE=3 SV=1;tr|A0A1D6E5Y9|A0A1D6E5Y9_MAIZE Phenylalanine ammonia-lyase OS=Zea mays OX=4577 GN=100384215 PE=3 SV=1;tr|C0PMJ0|C0PMJ0_MAIZE Phenylalanine ammonia-lyase O	21.341	40	7	24	NaN	24.1016	22.8507	23.7798	NaN	NaN	NaN	NaN	23.6007	NaN	NaN	23.0699	NaN	NaN	NaN	NaN	amine catabolic process;amine metabolic process;aromatic amino acid family catabolic process;aromatic amino acid family metabolic process;aromatic compound biosynthetic process;aromatic compound catabolic process;biosynthetic process;carboxylic acid catabolic process;carboxylic acid metabolic process;catabolic process;cellular amine metabolic process;cellular amino acid catabolic process;cellular…	ammonia-lyase activity;carbon-nitrogen lyase activity;catalytic activity;lyase activity;phenylalanine ammonia-lyase activity	cell part;cytoplasm;intracellular part	8	16.6	15.2	75.655	332860000	33
tr|A0A1D6E839|A0A1D6E839_MAIZE Topoisomerase-like protein OS=Zea mays OX=4577 GN=ZEAMMB73_Zm00001d003265 PE=4 SV=1;tr|A0A1D6E838|A0A1D6E838_MAIZE Topoisomerase-like protein OS=Zea mays OX=4577 GN=ZEAMMB73_Zm00001d003265 PE=4 SV=1	23.37	15.3	8	8	NaN	NaN	NaN	NaN	NaN	NaN	24.1954	23.3565	NaN	NaN	NaN	NaN	NaN	NaN	NaN	NaN				8	15.3	15.3	73.589	288130000	18
tr|A0A1D6E8D2|A0A1D6E8D2_MAIZE SWI/SNF complex subunit SWI3A OS=Zea mays OX=4577 GN=ZEAMMB73_Zm00001d003284 PE=4 SV=1;tr|A0A1D6E8D4|A0A1D6E8D4_MAIZE SWI/SNF complex subunit SWI3A OS=Zea mays OX=4577 GN=ZEAMMB73_Zm00001d003284 PE=4 SV=1;tr|A0A1D6E8D3|A0A1D6	2.2537	3.9	2	2	NaN	NaN	NaN	NaN	NaN	NaN	23.0999	NaN	NaN	NaN	NaN	NaN	NaN	NaN	NaN	NaN				2	3.9	3.9	96.75	155670000	4
tr|A0A1D6E8F2|A0A1D6E8F2_MAIZE Transglutaminase21 OS=Zea mays OX=4577 GN=542049 PE=4 SV=1;tr|A0A1D6E8F3|A0A1D6E8F3_MAIZE Transglutaminase21 OS=Zea mays OX=4577 GN=542049 PE=4 SV=1;tr|A0A1D6E8F4|A0A1D6E8F4_MAIZE Transglutaminase21 OS=Zea mays OX=4577 GN=542	4.1027	11.5	2	2	23.1325	NaN	NaN	NaN	NaN	NaN	NaN	NaN	NaN	NaN	NaN	NaN	NaN	NaN	NaN	NaN				2	11.5	11.5	26.948	36545000	5
tr|A0A1D6E955|A0A1D6E955_MAIZE Arsenical pump-driving ATPase OS=Zea mays OX=4577 GN=ZEAMMB73_Zm00001d003423 PE=4 SV=1	29.307	26.2	4	7	22.3105	22.742	22.4856	NaN	23.62	22.2963	22.4602	NaN	NaN	22.8836	22.9917	22.5068	NaN	NaN	NaN	NaN				7	26.2	19.7	42.365	206320000	20
tr|C0PD02|C0PD02_MAIZE Aldose 1-epimerase OS=Zea mays OX=4577 GN=100383094 PE=2 SV=1;tr|A0A1D6E987|A0A1D6E987_MAIZE Aldose 1-epimerase OS=Zea mays OX=4577 GN=100383094 PE=3 SV=1	5.198	12.7	3	3	NaN	NaN	NaN	NaN	NaN	NaN	24.4055	NaN	NaN	NaN	NaN	NaN	NaN	NaN	NaN	NaN	alcohol metabolic process;carbohydrate metabolic process;cellular carbohydrate metabolic process;cellular metabolic process;cellular process;hexose metabolic process;metabolic process;monosaccharide metabolic process;primary metabolic process;small molecule metabolic process	aldose 1-epimerase activity;binding;carbohydrate binding;catalytic activity;isomerase activity;racemase and epimerase activity;racemase and epimerase activity, acting on carbohydrates and derivatives		3	12.7	12.7	39.132	262460000	10
tr|B4G029|B4G029_MAIZE HXXXD-type acyl-transferase family protein OS=Zea mays OX=4577 GN=100283365 PE=2 SV=1	120.22	58.2	23	23	NaN	NaN	NaN	NaN	NaN	NaN	NaN	21.9349	NaN	21.963	22.0648	NaN	24.0126	NaN	NaN	NaN		catalytic activity;transferase activity;transferase activity, transferring acyl groups;transferase activity, transferring acyl groups other than amino-acyl groups		23	58.2	58.2	47.148	4967800000	196
tr|A0A1D6EAQ6|A0A1D6EAQ6_MAIZE Subtilisin-like protease SBT1.9 OS=Zea mays OX=4577 GN=103646447 PE=4 SV=1	47.801	15.6	9	9	NaN	NaN	NaN	NaN	NaN	23.4815	NaN	NaN	NaN	NaN	NaN	NaN	NaN	NaN	NaN	NaN				9	15.6	15.6	80.162	1413900000	46
tr|A0A1D6ED23|A0A1D6ED23_MAIZE DnaJ domain OS=Zea mays OX=4577 GN=103646599 PE=4 SV=1	47.942	24.2	2	10	NaN	NaN	NaN	NaN	NaN	NaN	NaN	NaN	NaN	NaN	NaN	NaN	NaN	NaN	NaN	21.5729				10	24.2	4.3	73.445	24749000	8
tr|A0A1D6ED99|A0A1D6ED99_MAIZE ATP-dependent DNA helicase OS=Zea mays OX=4577 GN=ZEAMMB73_Zm00001d004067 PE=3 SV=1	2.0468	2.3	1	3	NaN	NaN	NaN	NaN	NaN	26.2992	NaN	NaN	NaN	NaN	NaN	NaN	NaN	NaN	NaN	NaN				3	2.3	0.9	239.99	87496000	3
tr|A0A1D6HNW7|A0A1D6HNW7_MAIZE SAP-like protein BP-73 OS=Zea mays OX=4577 GN=ZEAMMB73_Zm00001d018432 PE=4 SV=1	94.859	38.5	15	15	28.597	24.9837	26.6536	25.9747	26.8295	NaN	28.0014	26.2257	23.2321	25.3595	25.6376	26.5102	27.6404	26.4769	27.4209	27.126				15	38.5	38.5	42.754	1850200000	81
tr|A0A1D6EFZ8|A0A1D6EFZ8_MAIZE Rhomboid-like protein 19 OS=Zea mays OX=4577 GN=100216993 PE=4 SV=1;tr|A0A1D6J2U1|A0A1D6J2U1_MAIZE Rhomboid-like protein 19 OS=Zea mays OX=4577 GN=100192037 PE=4 SV=1;tr|B4FAA8|B4FAA8_MAIZE Rhomboid-like protein 19 OS=Zea may	38.96	12.4	2	2	NaN	NaN	22.2379	NaN	NaN	NaN	NaN	NaN	NaN	NaN	NaN	NaN	NaN	NaN	NaN	NaN		catalytic activity;endopeptidase activity;hydrolase activity;peptidase activity;peptidase activity, acting on L-amino acid peptides;serine hydrolase activity;serine-type endopeptidase activity;serine-type peptidase activity	cell part;integral to membrane;intrinsic to membrane;membrane part	2	12.4	12.4	26.085	83495000	11
tr|A0A1D6EGC9|A0A1D6EGC9_MAIZE ATP-dependent DNA helicase OS=Zea mays OX=4577 GN=ZEAMMB73_Zm00001d004573 PE=3 SV=1;tr|A0A1D6EGD0|A0A1D6EGD0_MAIZE ATP-dependent DNA helicase OS=Zea mays OX=4577 GN=ZEAMMB73_Zm00001d004573 PE=3 SV=1	52.072	30.4	3	7	NaN	NaN	NaN	NaN	NaN	NaN	NaN	NaN	NaN	NaN	NaN	NaN	NaN	NaN	NaN	24.3333				4	14.6	11.6	43.366	289450000	6
tr|A0A1D6EGT0|A0A1D6EGT0_MAIZE Protein transport protein Sec24-like CEF OS=Zea mays OX=4577 GN=103646939 PE=4 SV=1;tr|A0A1D6EGV7|A0A1D6EGV7_MAIZE Protein transport protein Sec24-like CEF OS=Zea mays OX=4577 GN=103646939 PE=4 SV=1;tr|A0A1D6EGS6|A0A1D6EGS6_M	6.6186	25.5	4	17	22.8428	23.151	NaN	NaN	NaN	NaN	NaN	22.4736	22.149	22.4556	23.0189	22.7059	NaN	NaN	NaN	NaN				4	6.5	6.5	89.143	285980000	25
tr|A0A1D6EHH9|A0A1D6EHH9_MAIZE Protein TPLATE OS=Zea mays OX=4577 GN=ZEAMMB73_Zm00001d004784 PE=4 SV=1	58.93	29.1	2	7	NaN	NaN	NaN	NaN	NaN	NaN	NaN	22.5036	NaN	NaN	NaN	NaN	NaN	NaN	NaN	NaN				7	29.1	9.2	40.777	185740000	15
tr|A0A1D6EHU0|A0A1D6EHU0_MAIZE Transcription factor VIP1 OS=Zea mays OX=4577 GN=100285024 PE=4 SV=1;tr|B4FWJ9|B4FWJ9_MAIZE BZIP transcription factor OS=Zea mays OX=4577 GN=bZIP110 PE=2 SV=1;tr|A0A1D6EHT9|A0A1D6EHT9_MAIZE Transcription factor VIP1 OS=Zea ma	7.8039	12.7	5	5	23.1051	23.3576	NaN	NaN	NaN	NaN	NaN	NaN	NaN	NaN	NaN	NaN	NaN	NaN	23.1548	NaN		binding;DNA binding;nucleic acid binding;nucleic acid binding transcription factor activity;sequence-specific DNA binding;sequence-specific DNA binding transcription factor activity		5	12.7	12.7	35.624	190680000	20
tr|A0A1D6EJS4|A0A1D6EJS4_MAIZE Mitochondrial substrate carrier family protein OS=Zea mays OX=4577 GN=ZEAMMB73_Zm00001d005099 PE=3 SV=1;tr|A0A1D6EJS7|A0A1D6EJS7_MAIZE Mitochondrial substrate carrier family protein OS=Zea mays OX=4577 GN=ZEAMMB73_Zm00001d005	1.533	3.7	2	2	NaN	NaN	NaN	NaN	NaN	NaN	NaN	NaN	NaN	NaN	NaN	NaN	NaN	NaN	NaN	22.9409				2	3.7	3.7	58.658	84445000	6
tr|A0A1D6EKK0|A0A1D6EKK0_MAIZE NAD-dependent dihydrogenase, Gfo/Idh/MocA family OS=Zea mays OX=4577 GN=100283463 PE=4 SV=1;tr|A0A1D6EKJ9|A0A1D6EKJ9_MAIZE NAD-dependent dihydrogenase, Gfo/Idh/MocA family OS=Zea mays OX=4577 GN=100283463 PE=4 SV=1;tr|A0A1D6E	6.9285	15.4	4	4	NaN	22.5901	NaN	NaN	NaN	NaN	NaN	NaN	NaN	NaN	NaN	NaN	NaN	NaN	NaN	NaN				4	15.4	15.4	39.163	205570000	16
tr|A0A1D6EN25|A0A1D6EN25_MAIZE rRNA N-glycosidase OS=Zea mays OX=4577 GN=ZEAMMB73_Zm00001d005454 PE=3 SV=1	4.7822	3.9	2	2	NaN	21.5393	NaN	NaN	NaN	NaN	NaN	NaN	NaN	NaN	22.014	NaN	21.7804	NaN	NaN	NaN				2	3.9	3.9	61.992	29087000	9
tr|A0A1D6EN44|A0A1D6EN44_MAIZE Protein transport protein SEC13 homolog B OS=Zea mays OX=4577 GN=ZEAMMB73_Zm00001d005461 PE=3 SV=1	3.3294	25.2	2	5	NaN	NaN	NaN	NaN	NaN	NaN	22.9899	NaN	NaN	NaN	NaN	NaN	NaN	NaN	NaN	NaN				2	12.1	12.1	33.982	36917000	3
tr|A0A1D6ENT5|A0A1D6ENT5_MAIZE Putative leucyl-tRNA synthetase OS=Zea mays OX=4577 GN=103647355 PE=3 SV=1;tr|A0A1D6ENT6|A0A1D6ENT6_MAIZE Putative leucyl-tRNA synthetase OS=Zea mays OX=4577 GN=103647355 PE=4 SV=1	323.31	40.9	5	39	NaN	NaN	24.3584	23.8142	NaN	NaN	NaN	NaN	24.8835	24.2603	24.4461	24.1493	NaN	24.1622	23.5923	24.0304				39	40.9	6.8	123.06	620490000	57
tr|A0A1D6ETD2|A0A1D6ETD2_MAIZE Plant UBX domain-containing protein 8 OS=Zea mays OX=4577 GN=100273938 PE=4 SV=1;tr|A0A1D6ETD0|A0A1D6ETD0_MAIZE Plant UBX domain-containing protein 8 OS=Zea mays OX=4577 GN=100273938 PE=4 SV=1;tr|A0A1D6ETD3|A0A1D6ETD3_MAIZE P	18.441	9.9	2	2	NaN	NaN	NaN	NaN	NaN	NaN	NaN	NaN	NaN	23.1479	NaN	NaN	NaN	NaN	NaN	NaN				2	9.9	9.9	57.17	86695000	9
tr|A0A1D6ETU0|A0A1D6ETU0_MAIZE Lon protease homolog OS=Zea mays OX=4577 GN=ZEAMMB73_Zm00001d006214 PE=3 SV=1;tr|A0A1D6I9W6|A0A1D6I9W6_MAIZE Lon protease homolog 2, peroxisomal OS=Zea mays OX=4577 GN=732820 PE=3 SV=1;tr|A0A1D6ETV0|A0A1D6ETV0_MAIZE Lon prote	26.504	4.2	2	3	NaN	NaN	NaN	NaN	NaN	NaN	NaN	NaN	NaN	21.8132	NaN	NaN	NaN	NaN	NaN	NaN	establishment of localization;establishment of localization in cell;establishment of protein localization;establishment of protein localization to organelle;establishment of protein localization to peroxisome;intracellular protein transport;intracellular transport;macromolecule metabolic process;metabolic process;misfolded or incompletely synthesized protein catabolic process;peroxisomal transpor…	adenyl nucleotide binding;adenyl ribonucleotide binding;ATP binding;ATPase activity;ATPase activity, coupled;ATP-dependent peptidase activity;binding;catalytic activity;endopeptidase activity;hydrolase activity;hydrolase activity, acting on acid anhydrides;hydrolase activity, acting on acid anhydrides, in phosphorus-containing anhydrides;nucleoside-triphosphatase activity;nucleotide binding;pepti…	cell part;cytoplasmic part;intracellular organelle lumen;intracellular organelle part;intracellular part;membrane-enclosed lumen;microbody lumen;microbody part;organelle lumen;organelle part;peroxisomal matrix;peroxisomal part	2	3.3	3.3	112.08	43915000	5
tr|A0A1D6EU13|A0A1D6EU13_MAIZE Calcium lipid binding protein-like OS=Zea mays OX=4577 GN=100285684 PE=4 SV=1;tr|A0A1D6EU10|A0A1D6EU10_MAIZE Calcium lipid binding protein-like OS=Zea mays OX=4577 GN=100285684 PE=4 SV=1;tr|B6TBV7|B6TBV7_MAIZE Calcium lipid b	17.295	25.4	9	9	24.5541	23.0772	NaN	23.547	24.9996	24.0922	23.6785	24.1769	NaN	NaN	NaN	NaN	NaN	NaN	NaN	NaN				9	25.4	25.4	52.976	518080000	40
tr|A0A1D6EU65|A0A1D6EU65_MAIZE Alba DNA/RNA-binding protein OS=Zea mays OX=4577 GN=ZEAMMB73_Zm00001d006250 PE=4 SV=1	99.184	36.6	5	9	24.5052	24.1288	NaN	NaN	NaN	NaN	NaN	NaN	NaN	NaN	NaN	NaN	NaN	NaN	24.2217	NaN				7	32.1	20.7	32	836420000	50
tr|A0A1D6EU91|A0A1D6EU91_MAIZE Serine/threonine-protein kinase STY46 OS=Zea mays OX=4577 GN=100382522 PE=4 SV=1;tr|C0P8J5|C0P8J5_MAIZE Serine/threonine-protein kinase STY46 OS=Zea mays OX=4577 GN=100382522 PE=2 SV=1;tr|A0A1D6EU89|A0A1D6EU89_MAIZE Serine/th	33.917	29.3	10	10	NaN	NaN	NaN	NaN	NaN	NaN	NaN	23.3378	NaN	23.4041	23.7101	NaN	NaN	NaN	NaN	NaN		adenyl nucleotide binding;adenyl ribonucleotide binding;amine binding;amino acid binding;ATP binding;binding;carboxylic acid binding;catalytic activity;kinase activity;nucleotide binding;phosphotransferase activity, alcohol group as acceptor;protein kinase activity;purine nucleotide binding;purine ribonucleoside triphosphate binding;purine ribonucleotide binding;ribonucleotide binding;transferase…		10	29.3	29.3	63.529	193010000	15
tr|A0A1D6EUA2|A0A1D6EUA2_MAIZE Enoyl-CoA hydratase 2 peroxisomal OS=Zea mays OX=4577 GN=100272552 PE=4 SV=1;tr|B4FP93|B4FP93_MAIZE Enoyl-CoA hydratase 2 peroxisomal OS=Zea mays OX=4577 GN=100272552 PE=2 SV=1;tr|A0A1D6EU99|A0A1D6EU99_MAIZE Enoyl-CoA hydrata	3.6786	12.2	2	2	NaN	NaN	NaN	NaN	NaN	NaN	NaN	NaN	NaN	NaN	NaN	NaN	NaN	NaN	22.2612	NaN				2	12.2	12.2	32.404	28092000	8
tr|A0A1D6IAR9|A0A1D6IAR9_MAIZE Nudix hydrolase 23 chloroplastic OS=Zea mays OX=4577 GN=ZEAMMB73_Zm00001d021420 PE=4 SV=1;tr|A0A1D6EUQ6|A0A1D6EUQ6_MAIZE Nudix hydrolase 23 chloroplastic OS=Zea mays OX=4577 GN=100272585 PE=4 SV=1;tr|B4F8F0|B4F8F0_MAIZE Nudix	1.7907	9.8	2	2	NaN	NaN	NaN	NaN	NaN	NaN	NaN	NaN	NaN	NaN	NaN	23.1728	NaN	NaN	NaN	NaN		catalytic activity;hydrolase activity		2	9.8	9.8	23.247	15822000	2
tr|A0A1D6EVQ6|A0A1D6EVQ6_MAIZE Purple acid phosphatase OS=Zea mays OX=4577 GN=ZEAMMB73_Zm00001d006374 PE=3 SV=1	45.767	21.3	11	15	NaN	NaN	NaN	NaN	NaN	NaN	24.6733	NaN	NaN	NaN	NaN	NaN	NaN	NaN	NaN	NaN				14	20.3	18.5	74.258	2241300000	59
tr|A0A1D6EWJ3|A0A1D6EWJ3_MAIZE Glycosyltransferase OS=Zea mays OX=4577 GN=100272786 PE=3 SV=1	3.3706	9.1	4	4	NaN	NaN	22.8372	NaN	NaN	NaN	NaN	NaN	23.6026	NaN	NaN	NaN	NaN	NaN	NaN	NaN				4	9.1	9.1	46.75	149370000	5
tr|A0A1D6EX27|A0A1D6EX27_MAIZE Polyadenylate-binding protein RBP45C OS=Zea mays OX=4577 GN=ZEAMMB73_Zm00001d006496 PE=4 SV=1;tr|C0P5D0|C0P5D0_MAIZE Polyadenylate-binding protein RBP45C OS=Zea mays OX=4577 GN=ZEAMMB73_Zm00001d006496 PE=2 SV=1;tr|A0A1D6EX30|	49.758	18.7	4	4	23.9574	23.2314	23.6474	NaN	NaN	23.3602	NaN	NaN	NaN	NaN	NaN	NaN	NaN	NaN	NaN	NaN		binding;nucleic acid binding;nucleotide binding		4	18.7	18.7	38.476	372080000	30
tr|A0A1D6EXK9|A0A1D6EXK9_MAIZE Oxygen-evolving enhancer protein 3-1 OS=Zea mays OX=4577 GN=ZEAMMB73_Zm00001d006540 PE=4 SV=1	47.57	56	1	12	NaN	NaN	NaN	NaN	NaN	NaN	NaN	NaN	NaN	NaN	NaN	23.2497	NaN	NaN	NaN	NaN				12	56	5.1	23.051	17338000	2
tr|A0A1D6EXV7|A0A1D6EXV7_MAIZE Eukaryotic translation initiation factor 4G OS=Zea mays OX=4577 GN=103647746 PE=4 SV=1;tr|A0A1D6EXW9|A0A1D6EXW9_MAIZE Eukaryotic translation initiation factor 4G OS=Zea mays OX=4577 GN=103647746 PE=4 SV=1;tr|A0A1D6EXV3|A0A1D6	176.07	18.7	1	21	NaN	NaN	NaN	NaN	NaN	NaN	NaN	NaN	NaN	NaN	NaN	NaN	20.0708	NaN	NaN	NaN				15	14	0.8	194.13	3794800	0
tr|A0A1D6EZQ9|A0A1D6EZQ9_MAIZE C2 domain containing protein OS=Zea mays OX=4577 GN=100284908 PE=4 SV=1	24.644	24.5	5	9	20.6221	NaN	NaN	NaN	NaN	NaN	NaN	NaN	20.8386	NaN	NaN	NaN	NaN	21.0653	NaN	NaN				5	15.1	15.1	45.982	51697000	21
tr|B4F939|B4F939_MAIZE Histone deacetylase OS=Zea mays OX=4577 GN=541883 PE=2 SV=1;tr|A0A1D6F0N8|A0A1D6F0N8_MAIZE Histone deacetylase OS=Zea mays OX=4577 GN=541883 PE=4 SV=1;tr|A0A1D6F0P6|A0A1D6F0P6_MAIZE Histone deacetylase OS=Zea mays OX=4577 GN=541883 P	24.839	7.6	3	3	NaN	NaN	22.8096	NaN	NaN	NaN	NaN	NaN	NaN	22.9242	23.024	22.297	23.4495	NaN	NaN	23.1259		catalytic activity;hydrolase activity		3	7.6	7.6	76.544	275560000	20
tr|A0A1D6F212|A0A1D6F212_MAIZE Uncharacterized protein OS=Zea mays OX=4577 GN=100274081 PE=4 SV=1;tr|B4FBJ4|B4FBJ4_MAIZE Uncharacterized protein OS=Zea mays OX=4577 GN=100274081 PE=2 SV=1;tr|B4FSL4|B4FSL4_MAIZE Uncharacterized protein OS=Zea mays OX=4577 G	3.2413	49.5	2	8	NaN	NaN	NaN	NaN	NaN	NaN	NaN	NaN	NaN	NaN	NaN	NaN	NaN	21.6062	NaN	NaN				2	22.1	22.1	22.379	15152000	3
tr|A0A1D6F342|A0A1D6F342_MAIZE Histone H2B OS=Zea mays OX=4577 GN=103647911 PE=3 SV=1	58.291	71.1	2	18	NaN	NaN	NaN	NaN	NaN	NaN	NaN	NaN	26.0146	NaN	NaN	NaN	NaN	NaN	NaN	NaN				2	11.8	11.8	16.356	177950000	14
tr|B4FIH9|B4FIH9_MAIZE Xylose isomerase OS=Zea mays OX=4577 GN=100194385 PE=2 SV=1;tr|A0A1D6F3V1|A0A1D6F3V1_MAIZE Xylose isomerase OS=Zea mays OX=4577 GN=100194385 PE=3 SV=1;tr|A0A1D6F3V4|A0A1D6F3V4_MAIZE Xylose isomerase OS=Zea mays OX=4577 GN=100194385 P	107.72	55.4	7	19	23.668	NaN	22.9326	NaN	NaN	NaN	NaN	NaN	23.7797	NaN	NaN	23.6804	NaN	NaN	23.6068	NaN	alcohol catabolic process;alcohol metabolic process;carbohydrate catabolic process;carbohydrate metabolic process;catabolic process;cellular carbohydrate catabolic process;cellular carbohydrate metabolic process;cellular metabolic process;cellular nitrogen compound metabolic process;cellular process;coenzyme metabolic process;cofactor metabolic process;D-xylose metabolic process;glucose catabolic…	binding;catalytic activity;cation binding;intramolecular oxidoreductase activity;intramolecular oxidoreductase activity, interconverting aldoses and ketoses;ion binding;isomerase activity;metal ion binding;xylose isomerase activity		19	55.4	24.7	53.74	610600000	40
tr|A0A1D6F452|A0A1D6F452_MAIZE Histone-arginine methyltransferase CARM1 OS=Zea mays OX=4577 GN=100284501 PE=3 SV=1;tr|B6TUC1|B6TUC1_MAIZE Histone-arginine methyltransferase CARM1 OS=Zea mays OX=4577 GN=100284501 PE=2 SV=1;tr|A0A1D6F447|A0A1D6F447_MAIZE His	11.321	18.2	8	8	23.8786	NaN	NaN	NaN	NaN	NaN	NaN	NaN	NaN	NaN	NaN	NaN	NaN	NaN	NaN	NaN	cellular macromolecule metabolic process;cellular metabolic process;cellular process;cellular protein metabolic process;macromolecule metabolic process;macromolecule methylation;macromolecule modification;metabolic process;methylation;one-carbon metabolic process;primary metabolic process;protein alkylation;protein metabolic process;protein methylation;protein modification process;small molecule …	catalytic activity;methyltransferase activity;transferase activity;transferase activity, transferring one-carbon groups		8	18.2	18.2	58.574	290900000	30
tr|A0A1D6F4C8|A0A1D6F4C8_MAIZE Peroxidase OS=Zea mays OX=4577 GN=541674 PE=3 SV=1;tr|A0A1D6F4D0|A0A1D6F4D0_MAIZE Peroxidase OS=Zea mays OX=4577 GN=541674 PE=3 SV=1;sp|A5H454|PER66_MAIZE Peroxidase 66 OS=Zea mays OX=4577 GN=PER66 PE=1 SV=1	323.31	60.6	14	17	NaN	NaN	NaN	NaN	NaN	NaN	NaN	NaN	NaN	NaN	NaN	NaN	NaN	NaN	NaN	22.7063	catabolic process;cellular catabolic process;cellular metabolic process;cellular process;cellular response to chemical stimulus;cellular response to hydrogen peroxide;cellular response to oxidative stress;cellular response to reactive oxygen species;cellular response to stimulus;cellular response to stress;hydrogen peroxide catabolic process;hydrogen peroxide metabolic process;metabolic process;r…	antioxidant activity;binding;catalytic activity;cation binding;heme binding;ion binding;iron ion binding;metal ion binding;oxidoreductase activity;oxidoreductase activity, acting on peroxide as acceptor;peroxidase activity;tetrapyrrole binding;transition metal ion binding	extracellular region	16	57.8	52.5	33.474	8610200000	261
tr|A0A1D6F563|A0A1D6F563_MAIZE La-related protein 6B OS=Zea mays OX=4577 GN=100217316 PE=4 SV=1	21.626	24.3	4	7	23.9252	NaN	NaN	NaN	NaN	NaN	23.0818	22.995	NaN	NaN	NaN	NaN	NaN	NaN	NaN	NaN				7	24.3	14.5	51.271	286500000	26
tr|A0A1D6F5I7|A0A1D6F5I7_MAIZE Subtilisin-like serine endopeptidase family protein OS=Zea mays OX=4577 GN=ZEAMMB73_Zm00001d007319 PE=4 SV=1;tr|A0A1D6F5I8|A0A1D6F5I8_MAIZE Subtilisin-like serine endopeptidase family protein OS=Zea mays OX=4577 GN=ZEAMMB73_Z	17.029	14.6	5	6	NaN	NaN	NaN	NaN	NaN	26.6036	NaN	NaN	NaN	NaN	NaN	NaN	NaN	NaN	NaN	NaN		catalytic activity;endopeptidase activity;hydrolase activity;peptidase activity;peptidase activity, acting on L-amino acid peptides;serine hydrolase activity;serine-type endopeptidase activity;serine-type peptidase activity		6	14.6	11.7	69.636	57208000	8
tr|A0A1D6F5J9|A0A1D6F5J9_MAIZE ABC transporter I family member 11 chloroplastic OS=Zea mays OX=4577 GN=100501258 PE=4 SV=1;tr|A0A1D6F5K3|A0A1D6F5K3_MAIZE ABC transporter I family member 11 chloroplastic OS=Zea mays OX=4577 GN=100501258 PE=4 SV=1;tr|C4J260|	2.4308	18.3	2	2	NaN	NaN	NaN	NaN	NaN	NaN	NaN	NaN	NaN	NaN	NaN	21.5124	NaN	NaN	NaN	NaN		adenyl nucleotide binding;adenyl ribonucleotide binding;ATP binding;ATPase activity;binding;catalytic activity;hydrolase activity;hydrolase activity, acting on acid anhydrides;hydrolase activity, acting on acid anhydrides, in phosphorus-containing anhydrides;nucleoside-triphosphatase activity;nucleotide binding;purine nucleotide binding;purine ribonucleoside triphosphate binding;purine ribonucleo…	cell part;chloroplast envelope;chloroplast part;cytoplasmic part;envelope;intracellular organelle part;intracellular part;membrane;organelle envelope;organelle part;plastid envelope;plastid part	2	18.3	18.3	15.408	18156000	5
tr|C0P8C6|C0P8C6_MAIZE T-complex protein 1 subunit theta OS=Zea mays OX=4577 GN=100382493 PE=2 SV=1;tr|A0A1D6F6Y8|A0A1D6F6Y8_MAIZE T-complex protein 1 subunit theta OS=Zea mays OX=4577 GN=100382493 PE=3 SV=1;tr|A0A1D6F6Y7|A0A1D6F6Y7_MAIZE T-complex protein	8.0216	52	4	21	NaN	NaN	23.9414	NaN	NaN	NaN	24.1245	22.7146	23.4649	NaN	23.4319	NaN	NaN	NaN	NaN	NaN	cellular macromolecule metabolic process;cellular metabolic process;cellular process;cellular protein metabolic process;macromolecule metabolic process;metabolic process;primary metabolic process;protein folding;protein metabolic process	adenyl nucleotide binding;adenyl ribonucleotide binding;ATP binding;binding;nucleotide binding;purine nucleotide binding;purine ribonucleoside triphosphate binding;purine ribonucleotide binding;ribonucleotide binding	cell part;cytoplasm;intracellular part	4	13.9	13.9	58.98	373420000	19
tr|A0A1D6F8K6|A0A1D6F8K6_MAIZE DEAD-box ATP-dependent RNA helicase 52 OS=Zea mays OX=4577 GN=ZEAMMB73_Zm00001d007757 PE=4 SV=1;tr|A0A1D6F8K4|A0A1D6F8K4_MAIZE DEAD-box ATP-dependent RNA helicase 52 OS=Zea mays OX=4577 GN=ZEAMMB73_Zm00001d007757 PE=4 SV=1	160.75	60.5	2	40	NaN	NaN	NaN	NaN	NaN	NaN	NaN	25.4838	NaN	NaN	NaN	24.2256	NaN	NaN	NaN	NaN				2	8.7	8.7	67.989	735750000	31
tr|B6SV32|B6SV32_MAIZE Coatomer subunit gamma OS=Zea mays OX=4577 GN=100194138 PE=2 SV=1;tr|A0A1D6F8L6|A0A1D6F8L6_MAIZE Coatomer subunit gamma OS=Zea mays OX=4577 GN=100194138 PE=3 SV=1;tr|A0A1D6F8N1|A0A1D6F8N1_MAIZE Coatomer subunit gamma OS=Zea mays OX=4	215.93	35.5	3	24	NaN	NaN	NaN	NaN	NaN	NaN	NaN	NaN	NaN	NaN	NaN	NaN	24.2782	NaN	NaN	NaN	cellular process;establishment of localization;establishment of localization in cell;establishment of protein localization;intracellular protein transport;intracellular transport;protein transport;transport;vesicle-mediated transport	structural molecule activity	cell part;COPI vesicle coat;cytoplasmic part;cytoplasmic vesicle part;Golgi apparatus part;intracellular organelle part;intracellular part;macromolecular complex;membrane coat;membrane part;organelle part;protein complex;vesicle coat	24	35.5	6.4	98.62	390140000	19
tr|B4G146|B4G146_MAIZE D-lactate dehydrogenase [cytochrome] mitochondrial OS=Zea mays OX=4577 GN=100275430 PE=2 SV=1;tr|A0A1D6F9W6|A0A1D6F9W6_MAIZE D-lactate dehydrogenase [cytochrome] mitochondrial OS=Zea mays OX=4577 GN=100275430 PE=4 SV=1;tr|A0A1D6F9W7|	3.9875	5.6	2	2	NaN	NaN	23.4814	NaN	NaN	NaN	NaN	NaN	NaN	NaN	NaN	NaN	NaN	NaN	NaN	NaN	aldehyde catabolic process;catabolic process;cellular aldehyde metabolic process;cellular catabolic process;cellular metabolic process;cellular process;metabolic process;methylglyoxal catabolic process;methylglyoxal metabolic process	(S)-2-hydroxy-acid oxidase activity;adenyl nucleotide binding;adenyl ribonucleotide binding;ATP binding;binding;catalytic activity;coenzyme binding;cofactor binding;flavin adenine dinucleotide binding;glycolate dehydrogenase activity;glycolate oxidase activity;nucleotide binding;oxidoreductase activity;oxidoreductase activity, acting on CH-OH group of donors;oxidoreductase activity, acting on the…		2	5.6	5.6	60.134	44898000	8
tr|A0A1D6FA60|A0A1D6FA60_MAIZE Phosphatidylinositol 345-trisphosphate 3-phosphatase and protein-tyrosine-phosphatase PTEN2A OS=Zea mays OX=4577 GN=103648286 PE=4 SV=1;tr|A0A1D6FA59|A0A1D6FA59_MAIZE Phosphatidylinositol 345-trisphosphate 3-phosphatase and p	13.126	23.2	8	8	NaN	NaN	NaN	NaN	23.9391	NaN	24.1595	NaN	NaN	NaN	NaN	NaN	NaN	NaN	NaN	NaN				8	23.2	23.2	70.41	391130000	27
tr|A0A1D6FBG5|A0A1D6FBG5_MAIZE La-related protein 1A OS=Zea mays OX=4577 GN=ZEAMMB73_Zm00001d008289 PE=4 SV=1;tr|A0A1D6FBG3|A0A1D6FBG3_MAIZE La-related protein 1A OS=Zea mays OX=4577 GN=ZEAMMB73_Zm00001d008289 PE=4 SV=1	9.344	15.6	5	5	NaN	NaN	NaN	22.4311	NaN	NaN	NaN	NaN	NaN	NaN	NaN	NaN	NaN	NaN	NaN	NaN				5	15.6	15.6	42.44	120230000	15
tr|B4FL83|B4FL83_MAIZE Putative uridine nucleosidase 2 OS=Zea mays OX=4577 GN=100284073 PE=2 SV=1;tr|A0A1D6FCA7|A0A1D6FCA7_MAIZE Putative uridine nucleosidase 2 OS=Zea mays OX=4577 GN=100284073 PE=4 SV=1;tr|A0A1D6FCA6|A0A1D6FCA6_MAIZE Putative uridine nucl	1.616	11	2	3	NaN	NaN	NaN	NaN	NaN	NaN	NaN	NaN	NaN	NaN	NaN	23.0505	NaN	NaN	NaN	NaN		catalytic activity;hydrolase activity		3	11	7.7	34.855	35434000	3
tr|A0A1D6FDT0|A0A1D6FDT0_MAIZE Endonuclease 2 OS=Zea mays OX=4577 GN=100170237 PE=4 SV=1;tr|B4FRP4|B4FRP4_MAIZE Endonuclease 2 OS=Zea mays OX=4577 GN=100170237 PE=2 SV=1	6.184	14	2	2	NaN	22.9087	NaN	NaN	NaN	24.8106	NaN	NaN	NaN	NaN	NaN	NaN	NaN	NaN	NaN	NaN	catabolic process;cellular catabolic process;cellular macromolecule catabolic process;cellular macromolecule metabolic process;cellular metabolic process;cellular nitrogen compound metabolic process;cellular process;DNA catabolic process;DNA metabolic process;macromolecule catabolic process;macromolecule metabolic process;metabolic process;nitrogen compound metabolic process;nucleic acid metaboli…	binding;catalytic activity;endonuclease activity;hydrolase activity;hydrolase activity, acting on ester bonds;nuclease activity;nucleic acid binding		2	14	14	29.87	31707000	3
tr|B8A2I4|B8A2I4_MAIZE Vacuolar sorting protein 4b OS=Zea mays OX=4577 GN=ZEAMMB73_Zm00001d008596 PE=2 SV=1;tr|A0A1D6FE27|A0A1D6FE27_MAIZE Vacuolar sorting protein 4b OS=Zea mays OX=4577 GN=ZEAMMB73_Zm00001d008596 PE=3 SV=1;tr|A0A1D6FE31|A0A1D6FE31_MAIZE V	45.805	45.7	10	13	22.2134	23.9642	23.4352	NaN	NaN	NaN	NaN	NaN	NaN	NaN	NaN	NaN	NaN	NaN	NaN	NaN		adenyl nucleotide binding;adenyl ribonucleotide binding;ATP binding;binding;nucleotide binding;purine nucleotide binding;purine ribonucleoside triphosphate binding;purine ribonucleotide binding;ribonucleotide binding		13	45.7	37.5	48.249	409920000	58
tr|A0A1D6FE75|A0A1D6FE75_MAIZE Putative homeobox DNA-binding domain superfamily protein OS=Zea mays OX=4577 GN=103634821 PE=4 SV=1;tr|K7VAE7|K7VAE7_MAIZE HB transcription factor OS=Zea mays OX=4577 GN=103634821 PE=2 SV=1	14.626	20.5	2	2	NaN	23.4094	NaN	NaN	NaN	NaN	NaN	NaN	24.0713	NaN	NaN	NaN	NaN	NaN	NaN	NaN		binding;DNA binding;nucleic acid binding		2	20.5	20.5	20.078	26973000	6
tr|A0A1D6FGD1|A0A1D6FGD1_MAIZE Putative HLH DNA-binding domain superfamily protein OS=Zea mays OX=4577 GN=ZEAMMB73_Zm00001d008853 PE=4 SV=1;tr|A0A1D6MHH8|A0A1D6MHH8_MAIZE Putative transcription factor bHLH041 OS=Zea mays OX=4577 GN=ZEAMMB73_Zm00001d039459	1.6437	5.7	2	2	NaN	NaN	NaN	NaN	NaN	NaN	NaN	NaN	NaN	NaN	22.3935	NaN	NaN	NaN	NaN	NaN				2	5.7	5.7	51.897	5989800	2
tr|K7UV99|K7UV99_MAIZE ABC transporter D family member 2 chloroplastic OS=Zea mays OX=4577 GN=ZEAMMB73_Zm00001d008940 PE=4 SV=1;tr|A0A1D6FGR9|A0A1D6FGR9_MAIZE ABC transporter D family member 2 chloroplastic OS=Zea mays OX=4577 GN=ZEAMMB73_Zm00001d008940 PE	5.2942	7.6	3	3	22.7259	NaN	NaN	NaN	NaN	NaN	NaN	NaN	NaN	23.385	NaN	23.8032	NaN	23.0773	NaN	NaN	biosynthetic process;carbohydrate biosynthetic process;carbohydrate metabolic process;cellular biosynthetic process;cellular carbohydrate biosynthetic process;cellular carbohydrate metabolic process;cellular glucan metabolic process;cellular macromolecule biosynthetic process;cellular macromolecule metabolic process;cellular metabolic process;cellular polysaccharide biosynthetic process;cellular …	active transmembrane transporter activity;adenyl nucleotide binding;adenyl ribonucleotide binding;ATP binding;ATPase activity;ATPase activity, coupled;ATPase activity, coupled to movement of substances;ATPase activity, coupled to transmembrane movement of substances;binding;catalytic activity;hydrolase activity;hydrolase activity, acting on acid anhydrides;hydrolase activity, acting on acid anhyd…	cell part;integral to membrane;intrinsic to membrane;membrane part	3	7.6	7.6	63.095	85314000	7
tr|K7VRB6|K7VRB6_MAIZE Topoisomerase II-associated protein PAT1 OS=Zea mays OX=4577 GN=100383823 PE=4 SV=1;tr|A0A1D6FGY5|A0A1D6FGY5_MAIZE Topoisomerase II-associated protein PAT1 OS=Zea mays OX=4577 GN=100383823 PE=4 SV=1	6.4123	10.1	5	5	NaN	NaN	NaN	NaN	NaN	NaN	NaN	NaN	NaN	NaN	NaN	NaN	26.5914	NaN	NaN	24.6005				5	10.1	10.1	89.524	220220000	26
tr|A0A1D6FH75|A0A1D6FH75_MAIZE tRNAse Z4 OS=Zea mays OX=4577 GN=103635013 PE=3 SV=1;tr|K7UVK4|K7UVK4_MAIZE tRNAse Z4 OS=Zea mays OX=4577 GN=103635013 PE=3 SV=1;tr|A0A1D6FH69|A0A1D6FH69_MAIZE tRNAse Z4 OS=Zea mays OX=4577 GN=103635013 PE=3 SV=1;tr|A0A1D6FH7	6.305	4.6	2	3	NaN	NaN	NaN	NaN	NaN	NaN	NaN	NaN	NaN	NaN	NaN	NaN	23.9449	NaN	NaN	NaN	cellular macromolecule metabolic process;cellular metabolic process;cellular nitrogen compound metabolic process;cellular process;macromolecule metabolic process;metabolic process;ncRNA 3'-end processing;ncRNA metabolic process;ncRNA processing;nitrogen compound metabolic process;nucleic acid metabolic process;nucleic acid phosphodiester bond hydrolysis;nucleobase-containing compound metabolic pr…	catalytic activity;endonuclease activity;endonuclease activity, active with either ribo- or deoxyribonucleic acids and producing 5'-phosphomonoesters;endoribonuclease activity;endoribonuclease activity, producing 5'-phosphomonoesters;hydrolase activity;hydrolase activity, acting on ester bonds;nuclease activity;ribonuclease activity		3	4.6	3.5	102.5	60650000	4
tr|A0A1D6FIU4|A0A1D6FIU4_MAIZE HEAT repeat-containing protein OS=Zea mays OX=4577 GN=ZEAMMB73_Zm00001d009337 PE=4 SV=1;tr|A0A1D6FIU3|A0A1D6FIU3_MAIZE HEAT repeat-containing protein OS=Zea mays OX=4577 GN=ZEAMMB73_Zm00001d009337 PE=4 SV=1;tr|A0A1D6FIV5|A0A1	1.4393	5.1	3	3	NaN	NaN	NaN	NaN	NaN	NaN	NaN	24.7698	NaN	NaN	NaN	NaN	NaN	NaN	NaN	NaN				3	5.1	5.1	95.481	987820000	6
tr|A0A1D6FLE9|A0A1D6FLE9_MAIZE Tubulin gamma-2 chain OS=Zea mays OX=4577 GN=ZEAMMB73_Zm00001d009738 PE=3 SV=1	39.006	18	3	3	NaN	26.0293	26.5675	NaN	NaN	NaN	NaN	NaN	NaN	NaN	NaN	25.8455	NaN	NaN	NaN	NaN				3	18	18	24.151	700630000	26
tr|A0A1D6FMK3|A0A1D6FMK3_MAIZE RNA-binding protein BRN1 OS=Zea mays OX=4577 GN=103635500 PE=4 SV=1;tr|A0A1D6FMJ8|A0A1D6FMJ8_MAIZE RNA-binding protein BRN1 OS=Zea mays OX=4577 GN=103635500 PE=4 SV=1;tr|A0A1D6FMJ9|A0A1D6FMJ9_MAIZE RNA-binding protein BRN1 OS	8.8473	19.2	1	7	NaN	NaN	NaN	NaN	NaN	NaN	NaN	NaN	NaN	NaN	NaN	20.9611	NaN	NaN	NaN	NaN				4	13.2	3.3	49.219	6981800	1
tr|A0A1D6FNF6|A0A1D6FNF6_MAIZE Ubiquinone biosynthesis protein ubiB OS=Zea mays OX=4577 GN=ZEAMMB73_Zm00001d009987 PE=4 SV=1;tr|A0A1D6M162|A0A1D6M162_MAIZE Protein kinase superfamily protein OS=Zea mays OX=4577 GN=ZEAMMB73_Zm00001d037858 PE=4 SV=1;tr|A0A1D	1.6287	9.8	2	2	NaN	NaN	NaN	NaN	NaN	NaN	NaN	NaN	23.8964	NaN	NaN	NaN	NaN	NaN	NaN	NaN		adenyl nucleotide binding;adenyl ribonucleotide binding;ATP binding;binding;catalytic activity;kinase activity;nucleotide binding;phosphotransferase activity, alcohol group as acceptor;protein kinase activity;purine nucleotide binding;purine ribonucleoside triphosphate binding;purine ribonucleotide binding;ribonucleotide binding;transferase activity;transferase activity, transferring phosphorus-c…		2	9.8	9.8	33.065	18871000	3
tr|A0A1D6FR00|A0A1D6FR00_MAIZE Elongation factor 1-beta OS=Zea mays OX=4577 GN=ZEAMMB73_Zm00001d010431 PE=3 SV=1	24.847	42	4	10	NaN	24.2893	NaN	NaN	NaN	NaN	NaN	NaN	NaN	NaN	NaN	NaN	NaN	NaN	NaN	NaN				4	20.4	20.4	27.254	543870000	31
tr|A0A1D6FSS5|A0A1D6FSS5_MAIZE NAD(P)H dehydrogenase (Quinone) FQR1 OS=Zea mays OX=4577 GN=ZEAMMB73_Zm00001d010698 PE=4 SV=1;tr|K7VH40|K7VH40_MAIZE NAD(P)H dehydrogenase (Quinone) FQR1 OS=Zea mays OX=4577 GN=ZEAMMB73_Zm00001d010698 PE=4 SV=1	14.903	54.9	5	7	NaN	23.3855	NaN	NaN	NaN	NaN	NaN	NaN	NaN	NaN	NaN	NaN	NaN	NaN	NaN	NaN	biological regulation;negative regulation of biological process;negative regulation of biosynthetic process;negative regulation of cellular biosynthetic process;negative regulation of cellular macromolecule biosynthetic process;negative regulation of cellular metabolic process;negative regulation of cellular process;negative regulation of gene expression;negative regulation of macromolecule biosy…	binding;catalytic activity;coenzyme binding;cofactor binding;FMN binding;nucleotide binding;oxidoreductase activity		5	44	44	19.182	593690000	38
tr|A0A1D6FU73|A0A1D6FU73_MAIZE Starch synthase, chloroplastic/amyloplastic OS=Zea mays OX=4577 GN=ZEAMMB73_Zm00001d010821 PE=3 SV=1;tr|A0A1D6FU71|A0A1D6FU71_MAIZE Starch synthase, chloroplastic/amyloplastic OS=Zea mays OX=4577 GN=ZEAMMB73_Zm00001d010821 PE	3.6203	2.9	2	2	NaN	NaN	22.8517	NaN	NaN	NaN	NaN	NaN	NaN	23.4576	NaN	NaN	NaN	NaN	NaN	NaN	biosynthetic process;carbohydrate biosynthetic process;carbohydrate catabolic process;carbohydrate metabolic process;catabolic process;cell wall organization;cell wall organization or biogenesis;cellular biosynthetic process;cellular carbohydrate biosynthetic process;cellular carbohydrate metabolic process;cellular cell wall organization;cellular cell wall organization or biogenesis;cellular comp…	catalytic activity;glucosyltransferase activity;starch synthase activity;transferase activity;transferase activity, transferring glycosyl groups;transferase activity, transferring hexosyl groups	amyloplast;cell part;chloroplast;cytoplasmic part;intracellular membrane-bounded organelle;intracellular organelle;intracellular part;membrane-bounded organelle;organelle;plastid	2	2.9	2.9	97.493	43713000	4
tr|C4J0T5|C4J0T5_MAIZE IQ-domain 3 OS=Zea mays OX=4577 GN=Orphan34 PE=2 SV=1;tr|A0A1D6FVD8|A0A1D6FVD8_MAIZE IQ-domain 3 OS=Zea mays OX=4577 GN=ZEAMMB73_Zm00001d010975 PE=4 SV=1;tr|A0A1D6FVE0|A0A1D6FVE0_MAIZE IQ-domain 3 OS=Zea mays OX=4577 GN=ZEAMMB73_Zm00	7.1478	26.6	6	11	NaN	NaN	NaN	NaN	NaN	NaN	NaN	NaN	22.1264	22.8324	22.5436	NaN	22.7539	NaN	NaN	NaN				6	16.9	16.9	51.171	163460000	20
tr|B6TJY4|B6TJY4_MAIZE Dihydrolipoamide acetyltransferase component of pyruvate dehydrogenase complex OS=Zea mays OX=4577 GN=100283617 PE=2 SV=1;tr|A0A1D6MS22|A0A1D6MS22_MAIZE Dihydrolipoamide acetyltransferase component of pyruvate dehydrogenase complex O	155.17	44.9	16	16	NaN	23.175	24.6456	26.06	25.5955	26.7179	28.4445	27.5479	23.5522	21.8644	22.8896	24.9396	24.4052	26.3862	24.3967	25.6695	response to carbohydrate stimulus;response to chemical stimulus;response to fructose stimulus;response to hexose stimulus;response to monosaccharide stimulus;response to organic substance;response to stimulus	acetyltransferase activity;binding;catalytic activity;cation binding;dihydrolipoamide branched chain acyltransferase activity;dihydrolipoamide S-acyltransferase activity;ion binding;metal ion binding;S-acyltransferase activity;transferase activity;transferase activity, transferring acyl groups;transferase activity, transferring acyl groups other than amino-acyl groups;transition metal ion binding…		16	44.9	44.9	56.789	2878400000	193
tr|A0A1D6FXI1|A0A1D6FXI1_MAIZE Ras-related protein RABD2c OS=Zea mays OX=4577 GN=100191848 PE=4 SV=1;tr|B4FAE1|B4FAE1_MAIZE Ras-related protein RABD2c OS=Zea mays OX=4577 GN=100191848 PE=2 SV=1	2.3062	19	2	3	NaN	NaN	NaN	NaN	NaN	23.1033	NaN	NaN	NaN	NaN	NaN	NaN	NaN	NaN	NaN	NaN	biological regulation;cellular process;cellular response to stimulus;establishment of localization;establishment of protein localization;intracellular signal transduction;protein transport;regulation of biological process;regulation of cellular process;response to stimulus;signal transduction;small GTPase mediated signal transduction;transport	binding;GTP binding;guanyl nucleotide binding;guanyl ribonucleotide binding;nucleotide binding;purine nucleotide binding;purine ribonucleoside triphosphate binding;purine ribonucleotide binding;ribonucleotide binding		2	12.8	12.8	19.738	39572000	2
tr|A0A1D6G0K4|A0A1D6G0K4_MAIZE Transducin/WD40 repeat-like superfamily protein OS=Zea mays OX=4577 GN=ZEAMMB73_Zm00001d011483 PE=4 SV=1;tr|A0A1D6G0I7|A0A1D6G0I7_MAIZE Transducin/WD40 repeat-like superfamily protein OS=Zea mays OX=4577 GN=ZEAMMB73_Zm00001d0	19.401	29.9	6	24	NaN	NaN	NaN	NaN	NaN	NaN	NaN	23.6986	NaN	NaN	24.0557	NaN	NaN	NaN	NaN	NaN				6	7.4	7.4	146.37	403660000	18
tr|A0A1D6G0X9|A0A1D6G0X9_MAIZE Carboxyl-terminal-processing protease OS=Zea mays OX=4577 GN=ZEAMMB73_Zm00001d011518 PE=4 SV=1	5.9942	5.2	2	2	NaN	22.7395	22.4397	23.2118	NaN	NaN	NaN	NaN	NaN	NaN	NaN	NaN	NaN	NaN	NaN	NaN				2	5.2	5.2	50.13	40258000	4
tr|A0A1D6G1E8|A0A1D6G1E8_MAIZE ATP synthase protein I-related OS=Zea mays OX=4577 GN=ZEAMMB73_Zm00001d011569 PE=4 SV=1;tr|K7V4E4|K7V4E4_MAIZE ATP synthase protein I-related OS=Zea mays OX=4577 GN=ZEAMMB73_Zm00001d011569 PE=4 SV=1	4.3625	10.3	2	2	23.635	24.2691	23.7207	NaN	NaN	NaN	NaN	NaN	NaN	NaN	NaN	NaN	NaN	NaN	NaN	NaN	biological regulation;biosynthetic process;carbohydrate biosynthetic process;carbohydrate metabolic process;cellular biosynthetic process;cellular carbohydrate biosynthetic process;cellular carbohydrate metabolic process;cellular glucan metabolic process;cellular macromolecule biosynthetic process;cellular macromolecule metabolic process;cellular metabolic process;cellular polysaccharide biosynth…			2	10.3	10.3	32.198	62258000	4
tr|A0A1D6G2Z2|A0A1D6G2Z2_MAIZE Regulator of Vps4 activity in the MVB pathway protein OS=Zea mays OX=4577 GN=ZEAMMB73_Zm00001d011684 PE=4 SV=1;tr|A0A1D6G2Z0|A0A1D6G2Z0_MAIZE Regulator of Vps4 activity in the MVB pathway protein OS=Zea mays OX=4577 GN=ZEAMMB	7.4515	6.9	4	4	NaN	NaN	NaN	NaN	NaN	NaN	NaN	21.5398	NaN	21.3049	NaN	NaN	NaN	NaN	NaN	NaN				4	6.9	6.9	95.945	65765000	7
tr|B4G0S0|B4G0S0_MAIZE Putative ADP-ribosylation factor GTPase-activating protein AGD11 OS=Zea mays OX=4577 GN=100274407 PE=2 SV=1;tr|A0A1D6G4I9|A0A1D6G4I9_MAIZE Putative ADP-ribosylation factor GTPase-activating protein AGD11 OS=Zea mays OX=4577 GN=100274	15.62	21.4	8	8	NaN	23.4009	23.3147	NaN	NaN	NaN	NaN	NaN	NaN	NaN	NaN	NaN	NaN	NaN	23.7538	NaN	biosynthetic process;cellular aromatic compound metabolic process;cellular biosynthetic process;cellular metabolic process;cellular nitrogen compound biosynthetic process;cellular nitrogen compound metabolic process;cellular process;'de novo' pyrimidine base biosynthetic process;'de novo' UMP biosynthetic process;heterocycle biosynthetic process;heterocycle metabolic process;metabolic process;nit…	carbon-carbon lyase activity;carboxy-lyase activity;catalytic activity;lyase activity;orotate phosphoribosyltransferase activity;orotidine-5'-phosphate decarboxylase activity;transferase activity;transferase activity, transferring glycosyl groups;transferase activity, transferring pentosyl groups		8	21.4	21.4	51.249	296960000	29
tr|B4FIL4|B4FIL4_MAIZE Thioredoxin F-type chloroplastic OS=Zea mays OX=4577 GN=100216557 PE=2 SV=1;tr|A0A1D6G6C8|A0A1D6G6C8_MAIZE Thioredoxin F-type chloroplastic OS=Zea mays OX=4577 GN=100216557 PE=4 SV=1	4.2036	11.3	2	2	NaN	NaN	NaN	NaN	NaN	NaN	NaN	NaN	NaN	NaN	NaN	NaN	NaN	NaN	NaN	21.6905	alcohol catabolic process;alcohol metabolic process;biosynthetic process;carbohydrate biosynthetic process;carbohydrate catabolic process;carbohydrate metabolic process;carboxylic acid metabolic process;carotenoid biosynthetic process;carotenoid metabolic process;catabolic process;cellular aldehyde metabolic process;cellular biosynthetic process;cellular carbohydrate biosynthetic process;cellular…		cell part;chloroplast;cytoplasmic part;intracellular membrane-bounded organelle;intracellular organelle;intracellular part;membrane-bounded organelle;organelle;plastid	2	11.3	11.3	33.517	12345000	5
tr|B7ZZX6|B7ZZX6_MAIZE E3 ubiquitin-protein ligase RGLG1 OS=Zea mays OX=4577 GN=100279782 PE=2 SV=1;tr|A0A1D6N3Y9|A0A1D6N3Y9_MAIZE E3 ubiquitin-protein ligase RGLG1 OS=Zea mays OX=4577 GN=100279782 PE=4 SV=1;tr|K7V2F6|K7V2F6_MAIZE E3 ubiquitin-protein liga	55.197	11.3	3	3	22.7511	NaN	NaN	NaN	NaN	NaN	NaN	NaN	NaN	NaN	NaN	NaN	NaN	NaN	NaN	NaN		binding;cation binding;ion binding;metal ion binding;transition metal ion binding;zinc ion binding		3	11.3	11.3	49.924	152520000	19
tr|B4FVE8|B4FVE8_MAIZE Membrane-associated protein VIPP1 chloroplastic OS=Zea mays OX=4577 GN=ZEAMMB73_Zm00001d012168 PE=2 SV=1;tr|A0A1D6G789|A0A1D6G789_MAIZE Membrane-associated protein VIPP1 chloroplastic OS=Zea mays OX=4577 GN=ZEAMMB73_Zm00001d012168 PE	1.4296	45.6	2	16	NaN	23.4268	NaN	NaN	NaN	23.7256	NaN	NaN	NaN	23.0097	23.9299	NaN	NaN	NaN	NaN	NaN				2	5.1	5.1	35.006	89435000	6
tr|A0A1D6G7S7|A0A1D6G7S7_MAIZE Putative patellin family protein OS=Zea mays OX=4577 GN=103636439 PE=4 SV=1;tr|K7V6Z1|K7V6Z1_MAIZE Putative patellin family protein OS=Zea mays OX=4577 GN=103636439 PE=4 SV=1	11.142	36.6	6	20	NaN	NaN	NaN	NaN	NaN	NaN	NaN	23.8254	NaN	NaN	NaN	NaN	NaN	NaN	NaN	NaN	establishment of localization;transport		cell part;integral to membrane;intrinsic to membrane;membrane part	6	17.8	17.8	56.934	586700000	21
tr|A0A1D6G801|A0A1D6G801_MAIZE Uncharacterized protein OS=Zea mays OX=4577 GN=ZEAMMB73_Zm00001d012287 PE=4 SV=1	2.6442	13.1	2	2	NaN	NaN	NaN	NaN	NaN	NaN	NaN	NaN	23.9179	NaN	NaN	NaN	NaN	NaN	NaN	NaN				2	13.1	13.1	21.947	19997000	2
tr|B8A0C1|B8A0C1_MAIZE Protein kinase family protein with ARM repeat domain OS=Zea mays OX=4577 GN=100279852 PE=2 SV=1;tr|A0A1D6G971|A0A1D6G971_MAIZE Protein kinase family protein with ARM repeat domain OS=Zea mays OX=4577 GN=100279852 PE=4 SV=1;tr|A0A1D6G	68.266	22	4	15	NaN	NaN	NaN	NaN	NaN	NaN	22.083	NaN	NaN	NaN	NaN	NaN	NaN	NaN	NaN	NaN		adenyl nucleotide binding;adenyl ribonucleotide binding;ATP binding;binding;catalytic activity;kinase activity;nucleotide binding;phosphotransferase activity, alcohol group as acceptor;protein kinase activity;purine nucleotide binding;purine ribonucleoside triphosphate binding;purine ribonucleotide binding;ribonucleotide binding;transferase activity;transferase activity, transferring phosphorus-c…		15	22	6.8	89.433	186390000	19
tr|A0A1D6GAW7|A0A1D6GAW7_MAIZE UvrB/uvrC motif-containing protein OS=Zea mays OX=4577 GN=100280211 PE=4 SV=1;tr|A0A1D6GAW6|A0A1D6GAW6_MAIZE UvrB/uvrC motif-containing protein OS=Zea mays OX=4577 GN=100280211 PE=4 SV=1;tr|K7V8I9|K7V8I9_MAIZE UvrB/uvrC motif	3.8499	23.5	3	3	NaN	NaN	NaN	NaN	NaN	23.7741	NaN	NaN	NaN	NaN	NaN	NaN	NaN	NaN	NaN	NaN		binding;DNA binding;nucleic acid binding	cell part;chloroplast;cytoplasmic part;intracellular membrane-bounded organelle;intracellular organelle;intracellular part;membrane-bounded organelle;organelle;plastid	3	23.5	23.5	18.533	44373000	6
tr|A0A1D6GAZ6|A0A1D6GAZ6_MAIZE Glycerophosphodiester phosphodiesterase GDPD5 OS=Zea mays OX=4577 GN=ZEAMMB73_Zm00001d012677 PE=4 SV=1;tr|A0A1D6GAY6|A0A1D6GAY6_MAIZE Glycerophosphodiester phosphodiesterase GDPD5 OS=Zea mays OX=4577 GN=ZEAMMB73_Zm00001d01267	36.717	22.9	5	5	24.1148	23.9533	NaN	NaN	NaN	NaN	NaN	NaN	NaN	NaN	NaN	NaN	NaN	NaN	24.068	NaN	alcohol metabolic process;alditol metabolic process;carbohydrate metabolic process;cellular carbohydrate metabolic process;cellular metabolic process;cellular process;glycerol metabolic process;lipid metabolic process;metabolic process;polyol metabolic process;primary metabolic process;small molecule metabolic process	catalytic activity;glycerophosphodiester phosphodiesterase activity;hydrolase activity;hydrolase activity, acting on ester bonds;phosphoric diester hydrolase activity;phosphoric ester hydrolase activity		5	22.9	22.9	43.545	390390000	39
tr|A0A1D6GCD3|A0A1D6GCD3_MAIZE Profilin OS=Zea mays OX=4577 GN=542411 PE=3 SV=1;tr|A0A1D6GCD2|A0A1D6GCD2_MAIZE Profilin OS=Zea mays OX=4577 GN=103636667 PE=3 SV=1;sp|P35083|PROF3_MAIZE Profilin-3 OS=Zea mays OX=4577 GN=PRO3 PE=1 SV=1;tr|B4FCP0|B4FCP0_MAIZE	4.3163	19.3	2	2	NaN	22.3572	23.634	NaN	NaN	NaN	NaN	NaN	23.5615	NaN	NaN	NaN	NaN	NaN	NaN	NaN			cell part;cytoplasm;cytoskeleton;intracellular non-membrane-bounded organelle;intracellular organelle;intracellular part;non-membrane-bounded organelle;organelle	2	19.3	19.3	13.123	87990000	15
tr|A0A1D6GD67|A0A1D6GD67_MAIZE 26S proteasome non-ATPase regulatory subunit 12 homolog B OS=Zea mays OX=4577 GN=100382103 PE=4 SV=1;tr|C0P4D6|C0P4D6_MAIZE 26S proteasome non-ATPase regulatory subunit 12 homolog B OS=Zea mays OX=4577 GN=100382103 PE=2 SV=1;	31.576	16.1	5	5	NaN	NaN	NaN	NaN	NaN	NaN	NaN	NaN	22.6483	NaN	NaN	22.5011	NaN	NaN	22.175	NaN				5	16.1	16.1	43.308	198350000	25
tr|A0A1D6GES2|A0A1D6GES2_MAIZE DNA gyrase subunit A chloroplastic/mitochondrial OS=Zea mays OX=4577 GN=103625778 PE=4 SV=1;tr|A0A1D6GES4|A0A1D6GES4_MAIZE DNA gyrase subunit A chloroplastic/mitochondrial OS=Zea mays OX=4577 GN=103625778 PE=4 SV=1;tr|A0A1D6G	97.794	24.1	2	16	NaN	NaN	NaN	NaN	22.8796	NaN	NaN	23.0255	NaN	NaN	NaN	NaN	NaN	NaN	NaN	NaN				16	24.1	2.4	100	201140000	20
tr|A0A1D6L807|A0A1D6L807_MAIZE Vacuolar protein sorting 35 OS=Zea mays OX=4577 GN=ZEAMMB73_Zm00001d034492 PE=4 SV=1;tr|A0A1D6GFE9|A0A1D6GFE9_MAIZE Vacuolar protein sorting-associated protein 35B OS=Zea mays OX=4577 GN=100279276 PE=4 SV=1;tr|A0A1D6L810|A0A1	13.642	21.8	6	6	NaN	NaN	NaN	NaN	NaN	NaN	22.2654	NaN	NaN	NaN	NaN	NaN	NaN	NaN	NaN	NaN	cellular process;endosome transport;establishment of localization;establishment of localization in cell;establishment of protein localization;intracellular transport;protein transport;retrograde transport, endosome to Golgi;transport;vesicle-mediated transport		cell part;macromolecular complex;membrane part;protein complex;retromer complex	6	21.8	21.8	50.759	64434000	11
tr|A0A1D6GG86|A0A1D6GG86_MAIZE Uncharacterized protein OS=Zea mays OX=4577 GN=103625836 PE=4 SV=1	16.916	11.5	3	3	NaN	NaN	NaN	NaN	NaN	NaN	NaN	NaN	NaN	NaN	NaN	NaN	NaN	NaN	22.7421	NaN				3	11.5	11.5	42.249	223100000	11
tr|A0A1D6GHV2|A0A1D6GHV2_MAIZE Transmembrane emp24 domain-containing protein p24beta3 OS=Zea mays OX=4577 GN=100273391 PE=3 SV=1;tr|B4FV79|B4FV79_MAIZE Suppressor/enhancer of lin-12 protein 9 OS=Zea mays OX=4577 GN=100273391 PE=2 SV=1;tr|A0A1D6GHV1|A0A1D6G	3.7249	23	2	4	NaN	NaN	NaN	NaN	NaN	NaN	NaN	NaN	NaN	NaN	NaN	NaN	NaN	NaN	22.7741	NaN	establishment of localization;transport		cell part;integral to membrane;intrinsic to membrane;membrane part	4	23	13.5	22.662	114260000	2
tr|A0A1D6GJW7|A0A1D6GJW7_MAIZE Protein-protein interaction regulator family protein OS=Zea mays OX=4577 GN=100191788 PE=4 SV=1;tr|A0A1D6GJW1|A0A1D6GJW1_MAIZE Protein-protein interaction regulator family protein OS=Zea mays OX=4577 GN=100191788 PE=4 SV=1;tr	30.183	15.8	5	5	NaN	NaN	NaN	NaN	NaN	NaN	23.4908	NaN	NaN	NaN	NaN	NaN	NaN	NaN	NaN	NaN				5	15.8	15.8	50.076	328000000	23
tr|A0A1D6GKL1|A0A1D6GKL1_MAIZE Glycosyl hydrolase family 10 protein / carbohydrate-binding domain-containing protein OS=Zea mays OX=4577 GN=103625996 PE=4 SV=1	12.103	17.8	10	10	23.2235	NaN	23.2738	23.5369	NaN	NaN	NaN	NaN	NaN	NaN	NaN	NaN	NaN	NaN	NaN	NaN				10	17.8	17.8	82.008	251500000	23
tr|A0A1D6GKM3|A0A1D6GKM3_MAIZE Glucan endo-13-beta-glucosidase 7 OS=Zea mays OX=4577 GN=100273173 PE=3 SV=1	2.0461	7.8	2	2	NaN	NaN	NaN	NaN	NaN	NaN	NaN	NaN	NaN	NaN	NaN	NaN	NaN	NaN	NaN	21.7945				2	7.8	7.8	47.269	20385000	1
tr|A0A1D6GLA4|A0A1D6GLA4_MAIZE Transcription regulator NOT2/NOT3/NOT5 family protein OS=Zea mays OX=4577 GN=100193927 PE=4 SV=1;tr|A0A1D6GLA9|A0A1D6GLA9_MAIZE Transcription regulator NOT2/NOT3/NOT5 family protein OS=Zea mays OX=4577 GN=100193927 PE=4 SV=1;	102.12	20.4	5	10	NaN	NaN	NaN	NaN	NaN	NaN	NaN	NaN	NaN	23.403	23.5277	NaN	NaN	23.3037	NaN	NaN	biological regulation;regulation of biological process;regulation of biosynthetic process;regulation of cellular biosynthetic process;regulation of cellular macromolecule biosynthetic process;regulation of cellular metabolic process;regulation of cellular process;regulation of gene expression;regulation of macromolecule biosynthetic process;regulation of macromolecule metabolic process;regulation…		cell part;intracellular membrane-bounded organelle;intracellular organelle;intracellular part;membrane-bounded organelle;nucleus;organelle	5	12.2	12.2	94.071	313510000	33
tr|A0A1D6GLL2|A0A1D6GLL2_MAIZE Nucleic acid binding protein OS=Zea mays OX=4577 GN=ZEAMMB73_Zm00001d013712 PE=4 SV=1;tr|A0A1D6GLL4|A0A1D6GLL4_MAIZE Nucleic acid binding protein OS=Zea mays OX=4577 GN=ZEAMMB73_Zm00001d013712 PE=4 SV=1;tr|A0A1D6GLL3|A0A1D6GL	60.531	13.1	6	6	24.0227	NaN	NaN	NaN	NaN	NaN	NaN	NaN	NaN	NaN	NaN	23.1479	23.4603	NaN	NaN	NaN				6	13.1	13.1	56.48	348860000	31
tr|A0A1D6GLS4|A0A1D6GLS4_MAIZE Serpin-Z1 OS=Zea mays OX=4577 GN=ZEAMMB73_Zm00001d013737 PE=3 SV=1	144.77	16.3	3	5	25.0259	NaN	NaN	NaN	NaN	NaN	NaN	23.7129	NaN	NaN	NaN	NaN	NaN	NaN	NaN	NaN				5	16.3	10.3	44.386	538680000	22
tr|A0A1D6GNJ6|A0A1D6GNJ6_MAIZE Malic enzyme OS=Zea mays OX=4577 GN=100501486 PE=3 SV=1;tr|A0A1D6GNJ7|A0A1D6GNJ7_MAIZE Malic enzyme OS=Zea mays OX=4577 GN=100501486 PE=3 SV=1;tr|A0A1D6GNJ9|A0A1D6GNJ9_MAIZE Malic enzyme OS=Zea mays OX=4577 GN=100501486 PE=3	16.837	17.2	6	6	NaN	NaN	24.5904	NaN	NaN	NaN	NaN	NaN	NaN	NaN	NaN	NaN	NaN	NaN	NaN	NaN				6	17.2	17.2	67.455	338600000	11
tr|A0A1D6GP79|A0A1D6GP79_MAIZE Pre-mRNA-processing protein 40C OS=Zea mays OX=4577 GN=100304231 PE=4 SV=1;tr|A0A1D6GP74|A0A1D6GP74_MAIZE Pre-mRNA-processing protein 40C OS=Zea mays OX=4577 GN=100304231 PE=4 SV=1;tr|A0A1D6GP86|A0A1D6GP86_MAIZE Pre-mRNA-proc	20.455	6.1	4	4	NaN	NaN	NaN	23.2797	NaN	NaN	NaN	NaN	NaN	NaN	NaN	NaN	NaN	NaN	NaN	NaN				4	6.1	6.1	118.5	191920000	20
tr|A0A1D6GPU4|A0A1D6GPU4_MAIZE Nucleotide binding protein OS=Zea mays OX=4577 GN=ZEAMMB73_Zm00001d014085 PE=4 SV=1;tr|A0A1D6GPU5|A0A1D6GPU5_MAIZE Nucleotide binding protein OS=Zea mays OX=4577 GN=ZEAMMB73_Zm00001d014085 PE=4 SV=1	4.5124	6.8	3	3	NaN	NaN	NaN	NaN	NaN	NaN	22.0514	NaN	NaN	NaN	NaN	NaN	NaN	NaN	NaN	NaN				3	6.8	6.8	68.334	58888000	13
tr|A0A1D6GQ42|A0A1D6GQ42_MAIZE Cell division cycle protein 48 OS=Zea mays OX=4577 GN=100382880 PE=4 SV=1;tr|A0A1D6GQ41|A0A1D6GQ41_MAIZE Cell division cycle protein 48 OS=Zea mays OX=4577 GN=100382880 PE=3 SV=1;tr|A0A1D6GQ45|A0A1D6GQ45_MAIZE Cell division c	16.289	76.8	1	76	NaN	NaN	NaN	NaN	NaN	NaN	NaN	NaN	NaN	NaN	NaN	NaN	23.2952	NaN	NaN	NaN				3	5.1	3.8	90.117	169520000	23
tr|A0A1D6GQZ1|A0A1D6GQZ1_MAIZE ACT domain-containing protein ACR11 OS=Zea mays OX=4577 GN=ZEAMMB73_Zm00001d014192 PE=4 SV=1;tr|A0A1D6GQZ2|A0A1D6GQZ2_MAIZE ACT domain-containing protein ACR11 OS=Zea mays OX=4577 GN=ZEAMMB73_Zm00001d014192 PE=4 SV=1	14.53	26.4	4	4	NaN	NaN	NaN	NaN	NaN	NaN	NaN	NaN	NaN	NaN	NaN	NaN	NaN	NaN	25.6774	NaN				4	26.4	26.4	29.938	580440000	14
tr|A0A1D6GTB3|A0A1D6GTB3_MAIZE Glycerol-3-phosphate acyltransferase chloroplastic OS=Zea mays OX=4577 GN=ZEAMMB73_Zm00001d014426 PE=4 SV=1;tr|A0A1D6GTA2|A0A1D6GTA2_MAIZE Glycerol-3-phosphate acyltransferase OS=Zea mays OX=4577 GN=100285746 PE=4 SV=1;tr|A0A	5.6564	30.1	2	2	23.2603	NaN	NaN	NaN	NaN	NaN	NaN	NaN	NaN	NaN	NaN	NaN	NaN	NaN	NaN	NaN	alcohol metabolic process;biosynthetic process;carbohydrate metabolic process;carboxylic acid biosynthetic process;carboxylic acid metabolic process;carotenoid biosynthetic process;carotenoid metabolic process;cellular aldehyde metabolic process;cellular biosynthetic process;cellular carbohydrate metabolic process;cellular ketone metabolic process;cellular lipid metabolic process;cellular metabol…	catalytic activity;glycerol-3-phosphate O-acyltransferase activity;O-acyltransferase activity;transferase activity;transferase activity, transferring acyl groups;transferase activity, transferring acyl groups other than amino-acyl groups		2	30.1	30.1	15.22	48068000	4
tr|B6TIP7|B6TIP7_MAIZE Peptidyl-prolyl cis-trans isomerase OS=Zea mays OX=4577 GN=100283475 PE=2 SV=1;tr|A0A1D6GVX7|A0A1D6GVX7_MAIZE Peptidyl-prolyl cis-trans isomerase OS=Zea mays OX=4577 GN=100283475 PE=3 SV=1;tr|A0A1D6GVX5|A0A1D6GVX5_MAIZE Peptidyl-prol	113.54	62.3	2	16	NaN	23.9742	23.5221	NaN	NaN	NaN	NaN	NaN	23.3435	24.1299	23.9693	23.7521	23.3042	23.619	NaN	NaN	cellular macromolecule metabolic process;cellular metabolic process;cellular process;cellular protein metabolic process;macromolecule metabolic process;metabolic process;primary metabolic process;protein folding;protein metabolic process	catalytic activity;cis-trans isomerase activity;isomerase activity;peptidyl-prolyl cis-trans isomerase activity		14	57.2	12.6	23.078	670160000	26
tr|A0A1D6GW29|A0A1D6GW29_MAIZE (Z)-3-hexen-1-ol acetyltransferase OS=Zea mays OX=4577 GN=103626437 PE=4 SV=1	1.5434	4.7	2	2	NaN	NaN	23.9562	NaN	NaN	NaN	NaN	NaN	NaN	NaN	NaN	NaN	NaN	NaN	NaN	NaN				2	4.7	4.7	48.016	435220000	9
tr|A0A1D6GWN1|A0A1D6GWN1_MAIZE Basic endochitinase 1 OS=Zea mays OX=4577 GN=ZEAMMB73_Zm00001d014840 PE=4 SV=1	8.7608	18.2	5	5	NaN	24.4821	NaN	24.8951	NaN	26.3241	NaN	NaN	NaN	NaN	NaN	NaN	NaN	NaN	NaN	NaN				5	18.2	18.2	30.056	57387000	8
tr|A0A1D6GXA2|A0A1D6GXA2_MAIZE Clathrin light chain 2 OS=Zea mays OX=4577 GN=100277113 PE=4 SV=1;tr|B4FIZ5|B4FIZ5_MAIZE Clathrin light chain OS=Zea mays OX=4577 GN=100277113 PE=2 SV=1	6.4215	19.5	3	4	24.0288	24.2989	24.036	NaN	NaN	NaN	NaN	NaN	24.2261	NaN	NaN	24.1929	NaN	NaN	24.3578	NaN	cellular process;establishment of localization;establishment of localization in cell;establishment of protein localization;intracellular protein transport;intracellular transport;protein transport;transport;vesicle-mediated transport	structural molecule activity	cell part;clathrin coat;clathrin coat of coated pit;clathrin coat of trans-Golgi network vesicle;clathrin vesicle coat;cytoplasmic part;cytoplasmic vesicle part;Golgi apparatus part;intracellular organelle part;intracellular part;macromolecular complex;membrane coat;membrane part;organelle part;plasma membrane part;protein complex;vesicle coat	3	14	14	21.554	286070000	13
tr|A0A1D6GYV1|A0A1D6GYV1_MAIZE Glutamate--tRNA ligase chloroplastic/mitochondrial OS=Zea mays OX=4577 GN=100383787 PE=3 SV=1;tr|C0HG18|C0HG18_MAIZE Glutamate--tRNA ligase chloroplastic/mitochondrial OS=Zea mays OX=4577 GN=100383787 PE=2 SV=1	51.56	18.4	2	9	NaN	NaN	NaN	NaN	NaN	NaN	NaN	NaN	NaN	NaN	NaN	NaN	NaN	NaN	NaN	23.3031	amine metabolic process;amino acid activation;carboxylic acid metabolic process;cellular amine metabolic process;cellular amino acid metabolic process;cellular ketone metabolic process;cellular macromolecule metabolic process;cellular metabolic process;cellular nitrogen compound metabolic process;cellular process;glutamyl-tRNA aminoacylation;macromolecule metabolic process;metabolic process;ncRNA…	adenyl nucleotide binding;adenyl ribonucleotide binding;aminoacyl-tRNA ligase activity;ATP binding;binding;catalytic activity;glutamate-tRNA ligase activity;ligase activity;ligase activity, forming aminoacyl-tRNA and related compounds;ligase activity, forming carbon-oxygen bonds;nucleic acid binding;nucleotide binding;purine nucleotide binding;purine ribonucleoside triphosphate binding;purine rib…	cell part;cytoplasm;intracellular part	2	4.3	4.3	56.731	53595000	7
tr|A0A1D6GYY1|A0A1D6GYY1_MAIZE Histone deacetylase complex subunit SAP18 OS=Zea mays OX=4577 GN=100194333 PE=4 SV=1;tr|B4FIB4|B4FIB4_MAIZE Histone deacetylase complex subunit SAP18 OS=Zea mays OX=4577 GN=100194333 PE=2 SV=1;tr|A0A1D6GYW9|A0A1D6GYW9_MAIZE C	6.3098	34.7	1	3	NaN	NaN	21.649	NaN	NaN	NaN	NaN	NaN	NaN	NaN	NaN	NaN	NaN	22.0769	NaN	NaN				3	34.7	10.7	13.954	66255000	6
tr|A0A1D6H1C9|A0A1D6H1C9_MAIZE FAD/NAD(P)-binding oxidoreductase family protein OS=Zea mays OX=4577 GN=100272533 PE=4 SV=1;tr|A0A1D6H1D4|A0A1D6H1D4_MAIZE FAD/NAD(P)-binding oxidoreductase family protein OS=Zea mays OX=4577 GN=100272533 PE=4 SV=1;tr|A0A1D6H	9.7763	5.2	2	2	NaN	NaN	NaN	NaN	NaN	NaN	NaN	NaN	NaN	NaN	NaN	NaN	NaN	NaN	NaN	23.2361				2	5.2	5.2	60.58	103910000	21
tr|A0A1D6H1G0|A0A1D6H1G0_MAIZE 4-hydroxyphenylpyruvate dioxygenase OS=Zea mays OX=4577 GN=ZEAMMB73_Zm00001d015356 PE=3 SV=1	3.8695	8.3	2	2	NaN	23.6796	23.1311	NaN	NaN	23.8912	NaN	NaN	NaN	NaN	NaN	NaN	NaN	NaN	NaN	NaN				2	8.3	8.3	46.901	68159000	8
tr|B4FQP4|B4FQP4_MAIZE 4-coumarate--CoA ligase 1 OS=Zea mays OX=4577 GN=542166 PE=2 SV=1;tr|A0A1D6H286|A0A1D6H286_MAIZE 4-coumarate--CoA ligase 1 OS=Zea mays OX=4577 GN=542166 PE=4 SV=1;tr|A0A1D6H284|A0A1D6H284_MAIZE 4-coumarate--CoA ligase 1 OS=Zea mays O	65.071	35.7	14	16	NaN	24.1008	26.0039	24.5052	NaN	NaN	NaN	NaN	NaN	NaN	NaN	NaN	NaN	NaN	NaN	24.8706		catalytic activity		16	35.7	32.1	59.824	1310900000	86
tr|A0A1D6H295|A0A1D6H295_MAIZE Calmodulin binding protein OS=Zea mays OX=4577 GN=ZEAMMB73_Zm00001d015464 PE=4 SV=1;tr|A0A1D6H296|A0A1D6H296_MAIZE Calmodulin binding protein OS=Zea mays OX=4577 GN=ZEAMMB73_Zm00001d015464 PE=4 SV=1;tr|A0A1D6H2A0|A0A1D6H2A0_M	4.966	9.4	2	4	NaN	NaN	NaN	NaN	NaN	NaN	22.2643	NaN	NaN	NaN	NaN	NaN	NaN	NaN	NaN	NaN				2	4.7	4.7	67.577	105580000	10
tr|A0A1D6H2I0|A0A1D6H2I0_MAIZE Protein RRC1 OS=Zea mays OX=4577 GN=103626713 PE=4 SV=1;tr|A0A1D6H2H2|A0A1D6H2H2_MAIZE Protein RRC1 OS=Zea mays OX=4577 GN=103626713 PE=4 SV=1;tr|A0A1D6H2I3|A0A1D6H2I3_MAIZE Protein RRC1 OS=Zea mays OX=4577 GN=103626713 PE=4	4.3258	10	5	5	NaN	NaN	NaN	NaN	NaN	NaN	22.6347	NaN	21.9194	22.4892	22.6047	NaN	NaN	NaN	NaN	NaN				5	10	10	89.516	133150000	12
tr|A0A1D6H505|A0A1D6H505_MAIZE D-amino-acid transaminase chloroplastic OS=Zea mays OX=4577 GN=ZEAMMB73_Zm00001d016006 PE=4 SV=1	5.5697	15	4	4	NaN	NaN	NaN	NaN	23.5524	NaN	NaN	NaN	NaN	NaN	NaN	NaN	NaN	NaN	NaN	NaN				4	15	15	42.763	235390000	10
tr|A0A1D6H514|A0A1D6H514_MAIZE VHS and GAT domain protein OS=Zea mays OX=4577 GN=100281176 PE=4 SV=1;tr|A0A1D6H526|A0A1D6H526_MAIZE VHS and GAT domain protein OS=Zea mays OX=4577 GN=100281176 PE=4 SV=1;tr|A0A1D6H513|A0A1D6H513_MAIZE VHS and GAT domain prot	23.559	22.4	4	4	NaN	NaN	NaN	NaN	NaN	NaN	NaN	NaN	NaN	NaN	22.5114	NaN	NaN	NaN	NaN	NaN	establishment of localization;establishment of localization in cell;establishment of protein localization;intracellular protein transport;intracellular transport;protein transport;transport		cell part;intracellular	4	22.4	22.4	31.567	148780000	34
tr|A0A1D6H5E5|A0A1D6H5E5_MAIZE Pre-mRNA-splicing factor 3 OS=Zea mays OX=4577 GN=100217215 PE=4 SV=1;tr|A0A1D6H5F0|A0A1D6H5F0_MAIZE Pre-mRNA-splicing factor 3 OS=Zea mays OX=4577 GN=100217215 PE=4 SV=1;tr|A0A1D6H5E9|A0A1D6H5E9_MAIZE Pre-mRNA-splicing facto	6.0113	6.4	5	5	NaN	NaN	NaN	NaN	NaN	NaN	NaN	21.9395	NaN	NaN	21.9365	NaN	NaN	NaN	NaN	NaN				5	6.4	6.4	95.713	74510000	6
tr|A0A1D6H658|A0A1D6H658_MAIZE Peroxidase OS=Zea mays OX=4577 GN=ZEAMMB73_Zm00001d016185 PE=3 SV=1	104.69	56.7	10	10	24.8407	24.0885	24.8611	NaN	NaN	25.8424	24.163	NaN	24.5054	NaN	NaN	24.6581	NaN	NaN	NaN	NaN				10	56.7	56.7	33.11	649870000	66
tr|A0A1D6H6Q2|A0A1D6H6Q2_MAIZE Metallopeptidase M24 family protein OS=Zea mays OX=4577 GN=ZEAMMB73_Zm00001d016311 PE=3 SV=1;tr|A0A1D6H6P7|A0A1D6H6P7_MAIZE Metallopeptidase M24 family protein OS=Zea mays OX=4577 GN=ZEAMMB73_Zm00001d016311 PE=3 SV=1;tr|A0A1D	5.036	16.8	4	4	NaN	NaN	NaN	NaN	NaN	NaN	NaN	NaN	NaN	NaN	NaN	NaN	NaN	NaN	23.2633	NaN		aminopeptidase activity;binding;catalytic activity;cation binding;exopeptidase activity;hydrolase activity;ion binding;manganese ion binding;metal ion binding;peptidase activity;peptidase activity, acting on L-amino acid peptides;transition metal ion binding		4	16.8	16.8	46.423	305650000	7
tr|A0A1D6H802|A0A1D6H802_MAIZE Inositol-tetrakisphosphate 1-kinase OS=Zea mays OX=4577 GN=103627151 PE=3 SV=1	10.738	18.7	4	4	NaN	NaN	NaN	22.3843	NaN	NaN	NaN	NaN	NaN	NaN	NaN	NaN	NaN	23.3776	NaN	NaN				4	18.7	18.7	40.117	208840000	17
tr|A0A1D6H898|A0A1D6H898_MAIZE Polyadenylate-binding protein-interacting protein 3 OS=Zea mays OX=4577 GN=100502245 PE=4 SV=1;tr|A0A1D6H886|A0A1D6H886_MAIZE Polyadenylate-binding protein-interacting protein 3 OS=Zea mays OX=4577 GN=100502245 PE=4 SV=1;tr|A	73.989	24.5	8	10	NaN	NaN	NaN	NaN	NaN	NaN	NaN	NaN	NaN	NaN	NaN	NaN	NaN	23.6546	NaN	NaN				10	24.5	20.4	61.753	271090000	53
tr|A0A1D6H8S7|A0A1D6H8S7_MAIZE UPF0548 protein OS=Zea mays OX=4577 GN=ZEAMMB73_Zm00001d016543 PE=4 SV=1;tr|A0A1D6H8S6|A0A1D6H8S6_MAIZE UPF0548 protein OS=Zea mays OX=4577 GN=ZEAMMB73_Zm00001d016543 PE=4 SV=1;tr|A0A1D6H8S8|A0A1D6H8S8_MAIZE UPF0548 protein O	4.6756	15.8	2	2	NaN	NaN	NaN	NaN	NaN	NaN	NaN	NaN	NaN	NaN	NaN	NaN	NaN	23.0839	NaN	NaN				2	15.8	15.8	25.19	66122000	6
tr|A0A1D6H8U5|A0A1D6H8U5_MAIZE 3-oxoacyl-[acyl-carrier-protein] reductase chloroplastic OS=Zea mays OX=4577 GN=100274506 PE=4 SV=1;tr|A0A1D6H8U6|A0A1D6H8U6_MAIZE 3-oxoacyl-[acyl-carrier-protein] reductase chloroplastic OS=Zea mays OX=4577 GN=100274506 PE=4	6.6916	17.6	2	5	NaN	23.1189	23.4764	23.457	NaN	NaN	NaN	NaN	23.4047	NaN	23.5271	NaN	23.0844	NaN	NaN	NaN				2	9.9	9.9	32.233	80330000	10
tr|A0A1D6H8W6|A0A1D6H8W6_MAIZE Ubiquitin-activating enzyme E1 domain-containing protein 1 OS=Zea mays OX=4577 GN=100282359 PE=4 SV=1;tr|A0A1D6H8W5|A0A1D6H8W5_MAIZE Ubiquitin-activating enzyme E1 domain-containing protein 1 OS=Zea mays OX=4577 GN=100282359	47.387	29.4	9	9	NaN	NaN	23.7447	NaN	NaN	NaN	NaN	NaN	NaN	NaN	NaN	NaN	NaN	22.6558	23.4113	23.2689				9	29.4	29.4	46.427	504640000	49
tr|A0A1D6H9Z1|A0A1D6H9Z1_MAIZE Beta-fructofuranosidase, cell wall isozyme OS=Zea mays OX=4577 GN=ZEAMMB73_Zm00001d016708 PE=3 SV=1;sp|P49174|INVA_MAIZE Beta-fructofuranosidase, cell wall isozyme OS=Zea mays OX=4577 PE=2 SV=1	20.324	18.7	6	9	23.5842	NaN	22.824	NaN	NaN	NaN	NaN	NaN	NaN	23.183	23.0328	NaN	NaN	23.1791	NaN	NaN	carbohydrate metabolic process;metabolic process;primary metabolic process	alpha-glucosidase activity;beta-fructofuranosidase activity;catalytic activity;glucosidase activity;hydrolase activity;hydrolase activity, acting on glycosyl bonds;hydrolase activity, hydrolyzing O-glycosyl compounds;sucrose alpha-glucosidase activity	cell part;cell wall;external encapsulating structure;extracellular region	8	17	14.3	64.887	502460000	34
tr|A0A1D6HB10|A0A1D6HB10_MAIZE Thioredoxin-like 2 OS=Zea mays OX=4577 GN=ZEAMMB73_Zm00001d016893 PE=4 SV=1	18.668	16.1	3	3	24.7027	NaN	NaN	NaN	NaN	NaN	NaN	NaN	NaN	NaN	NaN	24.2576	NaN	NaN	NaN	23.8061				3	16.1	16.1	24.114	86519000	7
tr|A0A1D6HBA1|A0A1D6HBA1_MAIZE ATATH13 OS=Zea mays OX=4577 GN=ZEAMMB73_Zm00001d016926 PE=4 SV=1;tr|A0A1D6HBA0|A0A1D6HBA0_MAIZE ATATH13 OS=Zea mays OX=4577 GN=ZEAMMB73_Zm00001d016926 PE=4 SV=1;tr|A0A1D6IE86|A0A1D6IE86_MAIZE Uncharacterized protein OS=Zea ma	3.003	2.4	1	2	NaN	NaN	NaN	NaN	NaN	NaN	NaN	NaN	NaN	NaN	NaN	NaN	NaN	NaN	NaN	22.8054				2	2.4	1	79.145	29259000	4
tr|A0A1D6HBD7|A0A1D6HBD7_MAIZE Photosynthetic NDH subunit of lumenal location 2 chloroplastic OS=Zea mays OX=4577 GN=ZEAMMB73_Zm00001d016943 PE=4 SV=1	52.819	29.7	4	8	NaN	26.0032	NaN	NaN	NaN	NaN	NaN	NaN	27.3256	24.123	NaN	26.0239	NaN	NaN	NaN	NaN				8	29.7	15.1	24.216	331270000	14
tr|A0A1D6HBS5|A0A1D6HBS5_MAIZE Phosphoinositide binding OS=Zea mays OX=4577 GN=ZEAMMB73_Zm00001d017029 PE=4 SV=1;tr|A0A1D6HBS8|A0A1D6HBS8_MAIZE Phosphoinositide binding OS=Zea mays OX=4577 GN=ZEAMMB73_Zm00001d017029 PE=4 SV=1;tr|A0A1D6HBS3|A0A1D6HBS3_MAIZE	25.16	12.8	7	7	NaN	NaN	NaN	NaN	NaN	NaN	NaN	NaN	NaN	23.0699	24.0197	NaN	23.5467	22.8688	NaN	NaN				7	12.8	12.8	110.91	250540000	31
tr|A0A1D6HC36|A0A1D6HC36_MAIZE Eukaryotic translation initiation factor 4B OS=Zea mays OX=4577 GN=ZEAMMB73_Zm00001d017094 PE=4 SV=1	3.7134	11.7	4	5	NaN	NaN	21.6677	NaN	NaN	NaN	NaN	21.8787	NaN	NaN	22.3727	NaN	NaN	NaN	NaN	NaN				4	9.7	9.7	55.57	127400000	14
tr|A0A1D6HCY8|A0A1D6HCY8_MAIZE Uncharacterized protein OS=Zea mays OX=4577 GN=100383153 PE=4 SV=1;tr|C0PDM6|C0PDM6_MAIZE Uncharacterized protein OS=Zea mays OX=4577 GN=100383153 PE=2 SV=1;tr|A0A1D6HCZ4|A0A1D6HCZ4_MAIZE Uncharacterized protein OS=Zea mays O	10.656	10.1	5	7	NaN	NaN	NaN	NaN	NaN	NaN	NaN	22.8703	NaN	NaN	NaN	NaN	NaN	NaN	NaN	NaN				7	10.1	7.1	83.037	103180000	14
tr|A0A1D6HGI3|A0A1D6HGI3_MAIZE AP-2 complex subunit mu OS=Zea mays OX=4577 GN=100283476 PE=3 SV=1;tr|B6TIQ4|B6TIQ4_MAIZE AP-2 complex subunit mu OS=Zea mays OX=4577 GN=100283476 PE=2 SV=1;tr|A0A1D6HGI4|A0A1D6HGI4_MAIZE AP-2 complex subunit mu OS=Zea mays O	2.4967	9.1	4	4	NaN	NaN	NaN	NaN	22.4564	NaN	NaN	NaN	NaN	NaN	NaN	NaN	NaN	NaN	NaN	NaN	cellular process;establishment of localization;establishment of localization in cell;establishment of protein localization;intracellular protein transport;intracellular transport;protein transport;transport;vesicle-mediated transport		AP-type membrane coat adaptor complex;cell part;clathrin adaptor complex;cytoplasmic part;cytosol;intracellular part;macromolecular complex;membrane;membrane part;plasma membrane;protein complex	4	9.1	9.1	48.21	112450000	7
tr|A0A1D6HHX7|A0A1D6HHX7_MAIZE Heat shock 70 kDa protein 17 OS=Zea mays OX=4577 GN=100279899 PE=3 SV=1;tr|A0A1D6HHX6|A0A1D6HHX6_MAIZE Heat shock 70 kDa protein 17 OS=Zea mays OX=4577 GN=100279899 PE=3 SV=1;tr|A0A1D6HHY2|A0A1D6HHY2_MAIZE Heat shock 70 kDa p	71.929	18.4	5	14	NaN	NaN	NaN	NaN	NaN	NaN	NaN	NaN	NaN	NaN	NaN	22.8778	NaN	NaN	NaN	NaN				14	18.4	5.3	103.84	231870000	11
tr|A0A1D6HKP7|A0A1D6HKP7_MAIZE Annexin OS=Zea mays OX=4577 GN=ZEAMMB73_Zm00001d018090 PE=3 SV=1	12.164	32.8	9	10	NaN	23.1252	NaN	NaN	NaN	NaN	24.1053	NaN	25.5891	NaN	NaN	NaN	NaN	NaN	NaN	NaN				10	32.8	30.9	45.426	1068800000	39
tr|A0A1D6HKR8|A0A1D6HKR8_MAIZE Putative RNA-binding protein ARP1 OS=Zea mays OX=4577 GN=100279918 PE=4 SV=1;tr|A0A1D6HKR9|A0A1D6HKR9_MAIZE Putative RNA-binding protein ARP1 OS=Zea mays OX=4577 GN=100279918 PE=4 SV=1	43.89	51.8	3	7	NaN	NaN	NaN	NaN	NaN	NaN	NaN	23.1512	NaN	NaN	NaN	NaN	NaN	NaN	NaN	NaN				7	51.8	29.4	17.893	358110000	21
tr|A0A1D6HL75|A0A1D6HL75_MAIZE Ferredoxin--nitrite reductase chloroplastic OS=Zea mays OX=4577 GN=ZEAMMB73_Zm00001d018161 PE=4 SV=1;tr|A0A1D6HL76|A0A1D6HL76_MAIZE Ferredoxin--nitrite reductase chloroplastic OS=Zea mays OX=4577 GN=ZEAMMB73_Zm00001d018161 PE	19.843	47.9	9	27	NaN	24.5659	NaN	NaN	NaN	NaN	NaN	NaN	23.7843	NaN	NaN	23.8787	NaN	NaN	23.5451	NaN				9	17	17	67.417	939230000	65
tr|A0A1D6HN00|A0A1D6HN00_MAIZE PAP fibrillin family protein OS=Zea mays OX=4577 GN=ZEAMMB73_Zm00001d018348 PE=4 SV=1	4.9758	13.7	2	2	NaN	NaN	NaN	NaN	NaN	NaN	NaN	NaN	22.844	22.847	22.5395	24.115	NaN	22.9163	NaN	NaN				2	13.7	13.7	18.829	112900000	10
tr|A0A1D6HN88|A0A1D6HN88_MAIZE Diphosphomevalonate decarboxylase OS=Zea mays OX=4577 GN=100282878 PE=3 SV=1;tr|B6TCA9|B6TCA9_MAIZE Diphosphomevalonate decarboxylase OS=Zea mays OX=4577 GN=100282878 PE=2 SV=1;tr|A0A1D6HN90|A0A1D6HN90_MAIZE Diphosphomevalona	34.566	21.5	2	8	NaN	NaN	22.9006	NaN	NaN	NaN	NaN	NaN	NaN	NaN	NaN	NaN	NaN	NaN	NaN	NaN	acetyl-CoA metabolic process;biosynthetic process;cellular biosynthetic process;cellular lipid metabolic process;cellular metabolic process;cellular process;coenzyme metabolic process;cofactor metabolic process;isopentenyl diphosphate biosynthetic process;isopentenyl diphosphate biosynthetic process, mevalonate pathway;isopentenyl diphosphate metabolic process;lipid biosynthetic process;lipid met…	adenyl nucleotide binding;adenyl ribonucleotide binding;ATP binding;binding;carbon-carbon lyase activity;carboxy-lyase activity;catalytic activity;diphosphomevalonate decarboxylase activity;lyase activity;nucleotide binding;purine nucleotide binding;purine ribonucleoside triphosphate binding;purine ribonucleotide binding;ribonucleotide binding	cell part;cytoplasmic part;cytosol;intracellular part	2	5.1	5.1	42.687	225790000	18
tr|A0A1D6HNK5|A0A1D6HNK5_MAIZE Heparanase-like protein 3 OS=Zea mays OX=4577 GN=ZEAMMB73_Zm00001d018404 PE=4 SV=1;tr|A0A1D6HNK6|A0A1D6HNK6_MAIZE Heparanase-like protein 3 OS=Zea mays OX=4577 GN=ZEAMMB73_Zm00001d018404 PE=4 SV=1	10.949	7.1	3	3	NaN	NaN	NaN	NaN	NaN	23.8864	NaN	23.5491	NaN	NaN	NaN	NaN	NaN	NaN	NaN	NaN				3	7.1	7.1	53.107	202150000	6
tr|A0A1D6HPP4|A0A1D6HPP4_MAIZE Pumilio homolog 4 OS=Zea mays OX=4577 GN=ZEAMMB73_Zm00001d018496 PE=4 SV=1	2.4429	4.5	3	3	NaN	NaN	NaN	NaN	NaN	NaN	NaN	NaN	NaN	NaN	NaN	NaN	NaN	23.6075	NaN	NaN				3	4.5	4.5	108.91	99820000	2
tr|B4FRQ1|B4FRQ1_MAIZE Ribulose-phosphate 3-epimerase OS=Zea mays OX=4577 GN=100274365 PE=2 SV=1;tr|C0PPC8|C0PPC8_MAIZE Ribulose-phosphate 3-epimerase OS=Zea mays OX=4577 GN=ZEAMMB73_Zm00001d048324 PE=2 SV=1;tr|A0A1D6PJ99|A0A1D6PJ99_MAIZE Ribulose-phosphat	223.59	45.3	12	12	26.9223	29.9077	27.943	26.4474	26.413	29.6457	27.412	28.5631	30.4529	30.051	29.5808	31.2003	28.5407	27.5367	30.129	28.9895	alcohol catabolic process;alcohol metabolic process;carbohydrate catabolic process;carbohydrate metabolic process;catabolic process;cellular carbohydrate catabolic process;cellular carbohydrate metabolic process;cellular metabolic process;cellular nitrogen compound metabolic process;cellular process;coenzyme metabolic process;cofactor metabolic process;glucose catabolic process;glucose metabolic …	binding;catalytic activity;cation binding;ion binding;isomerase activity;metal ion binding;racemase and epimerase activity;racemase and epimerase activity, acting on carbohydrates and derivatives;ribulose-phosphate 3-epimerase activity		12	45.3	45.3	28.933	8422800000	188
tr|A0A1D6HQR2|A0A1D6HQR2_MAIZE Photosynthetic NDH subunit of lumenal location 3 chloroplastic OS=Zea mays OX=4577 GN=ZEAMMB73_Zm00001d018623 PE=4 SV=1	25.864	14.2	5	5	22.6179	NaN	NaN	NaN	NaN	NaN	NaN	NaN	25.8967	NaN	NaN	NaN	NaN	NaN	NaN	NaN				5	14.2	14.2	28.308	139350000	10
tr|A0A1D6HR37|A0A1D6HR37_MAIZE Dirigent protein OS=Zea mays OX=4577 GN=ZEAMMB73_Zm00001d018628 PE=3 SV=1	7.3363	9.3	2	2	NaN	NaN	NaN	NaN	NaN	NaN	NaN	NaN	NaN	NaN	NaN	22.5087	NaN	NaN	NaN	NaN				2	9.3	9.3	20.253	82682000	1
tr|A0A1D6HR40|A0A1D6HR40_MAIZE Dirigent protein OS=Zea mays OX=4577 GN=100273230 PE=3 SV=1	19.381	28.8	4	4	23.8184	NaN	NaN	NaN	NaN	NaN	NaN	NaN	NaN	NaN	NaN	NaN	NaN	NaN	NaN	NaN				4	28.8	28.8	25.013	854580000	28
tr|B4FI05|B4FI05_MAIZE Ferredoxin--NADP reductase, chloroplastic OS=Zea mays OX=4577 GN=100194249 PE=2 SV=1;tr|A0A1D6HS61|A0A1D6HS61_MAIZE Ferredoxin--NADP reductase, chloroplastic OS=Zea mays OX=4577 GN=100194249 PE=3 SV=1;tr|A0A1D6HS59|A0A1D6HS59_MAIZE F	9.0256	33.3	6	11	NaN	NaN	NaN	NaN	NaN	NaN	NaN	23.8331	NaN	NaN	NaN	NaN	NaN	NaN	NaN	NaN		catalytic activity;ferredoxin-NADP+ reductase activity;oxidoreductase activity;oxidoreductase activity, acting on iron-sulfur proteins as donors;oxidoreductase activity, acting on iron-sulfur proteins as donors, NAD or NADP as acceptor		6	22	22	42.123	269940000	10
tr|A0A1D6HSR3|A0A1D6HSR3_MAIZE Putative carboxylesterase 15 OS=Zea mays OX=4577 GN=103631970 PE=4 SV=1	47.337	52.1	11	11	NaN	NaN	NaN	24.6873	24.3426	NaN	NaN	NaN	24.1822	24.0313	24.089	NaN	NaN	NaN	NaN	NaN				11	52.1	52.1	35.427	1740100000	72
tr|A0A1D6HTG4|A0A1D6HTG4_MAIZE Putative ribose-5-phosphate isomerase 3 chloroplastic OS=Zea mays OX=4577 GN=ZEAMMB73_Zm00001d018936 PE=3 SV=1	41.974	8.9	3	3	25.474	25.181	25.3289	NaN	NaN	NaN	NaN	NaN	25.8587	NaN	NaN	26.2418	NaN	NaN	NaN	NaN				3	8.9	8.9	43.502	274610000	11
tr|A0A1D6HV20|A0A1D6HV20_MAIZE HIPL1 protein OS=Zea mays OX=4577 GN=ZEAMMB73_Zm00001d019089 PE=4 SV=1	259	21.2	10	10	NaN	NaN	NaN	NaN	NaN	NaN	23.2385	NaN	NaN	NaN	NaN	NaN	NaN	NaN	NaN	NaN				10	21.2	21.2	72.444	1276100000	78
tr|A0A1D6HV53|A0A1D6HV53_MAIZE Coatomer subunit gamma OS=Zea mays OX=4577 GN=100193726 PE=3 SV=1;tr|A0A1D6HV45|A0A1D6HV45_MAIZE Coatomer subunit gamma OS=Zea mays OX=4577 GN=100193726 PE=3 SV=1;tr|A0A1D6HV44|A0A1D6HV44_MAIZE Coatomer subunit gamma OS=Zea m	20.791	35	3	23	NaN	NaN	22.7767	NaN	24.0606	22.9229	NaN	23.654	NaN	NaN	23.2905	NaN	NaN	NaN	NaN	NaN				3	5.8	5.8	93.961	395830000	28
tr|A0A1D6HWR7|A0A1D6HWR7_MAIZE IAA-amino acid hydrolase ILR1 OS=Zea mays OX=4577 GN=100274355 PE=4 SV=1;tr|B4G0F2|B4G0F2_MAIZE IAA-amino acid hydrolase ILR1 OS=Zea mays OX=4577 GN=100274355 PE=2 SV=1;tr|A0A1D6HWR8|A0A1D6HWR8_MAIZE IAA-amino acid hydrolase	1.881	8.7	2	3	NaN	NaN	NaN	NaN	NaN	23.097	NaN	NaN	NaN	NaN	NaN	NaN	NaN	NaN	NaN	NaN		catalytic activity;hydrolase activity		2	6.6	6.6	45.65	53277000	2
tr|A0A1D6HXH3|A0A1D6HXH3_MAIZE DEAD-box ATP-dependent RNA helicase 5 OS=Zea mays OX=4577 GN=100383160 PE=3 SV=1;tr|A0A1D6HXG8|A0A1D6HXG8_MAIZE DEAD-box ATP-dependent RNA helicase 5 OS=Zea mays OX=4577 GN=100383160 PE=3 SV=1;tr|C0PDP9|C0PDP9_MAIZE DEAD-box	18.009	16.6	7	7	23.586	NaN	NaN	NaN	NaN	NaN	NaN	NaN	NaN	NaN	NaN	NaN	NaN	NaN	NaN	NaN	cellular macromolecule metabolic process;cellular metabolic process;cellular nitrogen compound metabolic process;cellular process;macromolecule metabolic process;macromolecule methylation;macromolecule modification;metabolic process;methylation;nitrogen compound metabolic process;nucleic acid metabolic process;nucleobase-containing compound metabolic process;one-carbon metabolic process;primary m…	adenyl nucleotide binding;adenyl ribonucleotide binding;ATP binding;binding;catalytic activity;helicase activity;hydrolase activity;hydrolase activity, acting on acid anhydrides;hydrolase activity, acting on acid anhydrides, in phosphorus-containing anhydrides;nucleic acid binding;nucleoside-triphosphatase activity;nucleotide binding;purine nucleotide binding;purine ribonucleoside triphosphate bi…	cell part;cytoplasmic part;cytosol;intracellular part	7	16.6	16.6	54.473	345450000	20
tr|C0PP98|C0PP98_MAIZE Calcium-dependent lipid-binding (CaLB domain) family protein OS=Zea mays OX=4577 GN=100384434 PE=2 SV=1;tr|A0A1D6HXL9|A0A1D6HXL9_MAIZE Calcium-dependent lipid-binding (CaLB domain) family protein OS=Zea mays OX=4577 GN=100384434 PE=4	10.609	15	1	5	NaN	NaN	NaN	NaN	NaN	NaN	NaN	NaN	NaN	NaN	NaN	NaN	21.9315	NaN	NaN	NaN				5	15	5	54.705	15851000	0
tr|A0A1D6HYA6|A0A1D6HYA6_MAIZE COP1-interacting protein-related OS=Zea mays OX=4577 GN=103632278 PE=4 SV=1;tr|A0A1D6HYC6|A0A1D6HYC6_MAIZE COP1-interacting protein-related OS=Zea mays OX=4577 GN=103632278 PE=4 SV=1;tr|A0A1D6HYB4|A0A1D6HYB4_MAIZE COP1-intera	25.868	12.2	7	8	NaN	NaN	23.7891	NaN	NaN	NaN	NaN	NaN	24.1544	NaN	NaN	NaN	NaN	NaN	NaN	NaN				8	12.2	11	96.875	169420000	11
tr|A0A1D6HYS3|A0A1D6HYS3_MAIZE Phosphoglucosamine mutase family protein OS=Zea mays OX=4577 GN=ZEAMMB73_Zm00001d019567 PE=4 SV=1	16.11	13	2	2	NaN	NaN	22.7214	NaN	NaN	NaN	NaN	22.828	NaN	NaN	NaN	NaN	NaN	NaN	NaN	NaN				2	13	13	20.192	169170000	24
tr|A0A1D6I0S8|A0A1D6I0S8_MAIZE Rhodanese-like domain-containing protein 9 chloroplastic OS=Zea mays OX=4577 GN=ZEAMMB73_Zm00001d019899 PE=4 SV=1	2.9425	12.5	3	3	NaN	NaN	NaN	NaN	NaN	NaN	NaN	NaN	NaN	NaN	NaN	NaN	NaN	NaN	NaN	26.5878				3	12.5	12.5	35.101	240830000	9
tr|A0A1D6I2Q4|A0A1D6I2Q4_MAIZE Protein arginine N-methyltransferase 1.1 OS=Zea mays OX=4577 GN=ZEAMMB73_Zm00001d020188 PE=4 SV=1	38.35	21.5	2	4	NaN	NaN	NaN	NaN	NaN	NaN	NaN	NaN	NaN	NaN	NaN	NaN	22.0896	NaN	NaN	NaN				2	6.8	6.8	28.421	41319000	6
tr|A0A1D6I353|A0A1D6I353_MAIZE THO complex subunit 6 OS=Zea mays OX=4577 GN=103632647 PE=4 SV=1;tr|A0A1D6I354|A0A1D6I354_MAIZE THO complex subunit 6 OS=Zea mays OX=4577 GN=103632647 PE=4 SV=1	6.7297	7.6	3	3	NaN	NaN	NaN	NaN	NaN	NaN	NaN	NaN	NaN	NaN	NaN	21.9347	NaN	NaN	NaN	NaN				3	7.6	7.6	40.849	156700000	21
tr|A0A1D6I3Q1|A0A1D6I3Q1_MAIZE DEAD-box ATP-dependent RNA helicase 22 OS=Zea mays OX=4577 GN=103632701 PE=4 SV=1;tr|A0A1D6I3Q2|A0A1D6I3Q2_MAIZE DEAD-box ATP-dependent RNA helicase 22 OS=Zea mays OX=4577 GN=103632701 PE=4 SV=1;tr|A0A1D6I3P9|A0A1D6I3P9_MAIZE	1.6998	5.1	2	2	NaN	NaN	NaN	NaN	NaN	NaN	NaN	NaN	NaN	NaN	NaN	NaN	NaN	NaN	NaN	22.6521				2	5.1	5.1	63.403	51443000	2
tr|A0A1D6I3Z8|A0A1D6I3Z8_MAIZE Putative cinnamyl alcohol dehydrogenase 6 OS=Zea mays OX=4577 GN=ZEAMMB73_Zm00001d020401 PE=3 SV=1	91.252	46.8	7	7	NaN	NaN	NaN	NaN	NaN	NaN	NaN	NaN	NaN	NaN	NaN	NaN	22.5407	NaN	NaN	NaN				7	46.8	46.8	24.307	2661600000	79
tr|A0A1D6I411|A0A1D6I411_MAIZE Plant UBX domain-containing protein 2 OS=Zea mays OX=4577 GN=103632724 PE=4 SV=1	10.102	16.1	3	4	NaN	NaN	NaN	NaN	NaN	NaN	23.636	NaN	NaN	NaN	NaN	NaN	NaN	NaN	NaN	NaN				4	16.1	12.9	47.088	176460000	17
tr|B4FQ07|B4FQ07_MAIZE DNA repair protein RAD23 OS=Zea mays OX=4577 GN=ZEAMMB73_Zm00001d020419 PE=2 SV=1;tr|A0A1D6I427|A0A1D6I427_MAIZE Ubiquitin receptor RAD23c OS=Zea mays OX=4577 GN=ZEAMMB73_Zm00001d020419 PE=4 SV=1;tr|A0A1D6I426|A0A1D6I426_MAIZE Ubiqui	38.514	16.6	4	5	24.807	NaN	NaN	NaN	NaN	NaN	NaN	24.384	NaN	NaN	24.0567	23.6193	NaN	NaN	NaN	NaN	catabolic process;cellular catabolic process;cellular macromolecule catabolic process;cellular macromolecule metabolic process;cellular metabolic process;cellular nitrogen compound metabolic process;cellular process;cellular response to stimulus;cellular response to stress;DNA metabolic process;DNA repair;macromolecule catabolic process;macromolecule metabolic process;metabolic process;modificati…	binding;damaged DNA binding;DNA binding;nucleic acid binding	cell part;intracellular membrane-bounded organelle;intracellular organelle;intracellular part;membrane-bounded organelle;nucleus;organelle	4	14.5	14.5	41.475	563640000	27
tr|A0A1D6I492|A0A1D6I492_MAIZE Uncharacterized protein OS=Zea mays OX=4577 GN=103632738 PE=4 SV=1;tr|A0A1D6I494|A0A1D6I494_MAIZE Uncharacterized protein OS=Zea mays OX=4577 GN=103632738 PE=4 SV=1;tr|K7V958|K7V958_MAIZE Uncharacterized protein OS=Zea mays O	1.76	3.6	2	2	NaN	NaN	NaN	NaN	NaN	NaN	NaN	NaN	NaN	NaN	22.951	NaN	NaN	NaN	NaN	NaN	biosynthetic process;cellular biosynthetic process;cellular macromolecule biosynthetic process;cellular macromolecule metabolic process;cellular metabolic process;cellular process;cellular protein metabolic process;macromolecule biosynthetic process;macromolecule metabolic process;metabolic process;primary metabolic process;protein metabolic process;translation	structural constituent of ribosome;structural molecule activity	cell part;cytoplasmic part;intracellular non-membrane-bounded organelle;intracellular organelle;intracellular part;macromolecular complex;non-membrane-bounded organelle;organelle;ribonucleoprotein complex;ribosome	2	3.6	3.6	98.103	124930000	9
tr|A0A1D6I5R5|A0A1D6I5R5_MAIZE Putative carboxylesterase 2 OS=Zea mays OX=4577 GN=ZEAMMB73_Zm00001d020707 PE=4 SV=1	11.41	35	7	7	23.8646	24.4682	24.1815	NaN	NaN	NaN	NaN	NaN	NaN	24.5439	24.6369	24.2839	24.2677	NaN	NaN	NaN				7	35	35	30.694	985280000	47
tr|A0A1D6I600|A0A1D6I600_MAIZE Gibberellin receptor GID1L2 OS=Zea mays OX=4577 GN=ZEAMMB73_Zm00001d020738 PE=4 SV=1	2.5972	23.4	3	4	NaN	NaN	NaN	NaN	NaN	NaN	NaN	NaN	NaN	NaN	NaN	23.5295	NaN	NaN	NaN	NaN				3	18.6	18.6	35.813	39336000	3
tr|A0A1D6K7N5|A0A1D6K7N5_MAIZE Hexose transporter OS=Zea mays OX=4577 GN=100285573 PE=3 SV=1;tr|B6U6U2|B6U6U2_MAIZE Hexose transporter OS=Zea mays OX=4577 GN=100285573 PE=2 SV=1;tr|A0A1D6K7M5|A0A1D6K7M5_MAIZE Hexose transporter OS=Zea mays OX=4577 GN=10028	199.16	33	16	16	23.2799	NaN	NaN	22.6699	26.5242	24.7832	26.3397	27.6589	NaN	22.3555	24.016	22.5568	24.4578	21.88	24.7328	24.826		substrate-specific transmembrane transporter activity;substrate-specific transporter activity;transmembrane transporter activity;transporter activity	cell part;integral to membrane;intrinsic to membrane;membrane part	16	33	33	77.281	3380000000	132
tr|A0A1D6I6D7|A0A1D6I6D7_MAIZE S-adenosyl-L-methionine-dependent methyltransferase superfamily protein OS=Zea mays OX=4577 GN=100272508 PE=3 SV=1;tr|A0A1D6I6D4|A0A1D6I6D4_MAIZE S-adenosyl-L-methionine-dependent methyltransferase superfamily protein OS=Zea	15.213	20.1	10	10	NaN	NaN	NaN	NaN	NaN	NaN	23.9135	NaN	NaN	NaN	NaN	NaN	NaN	NaN	NaN	NaN				10	20.1	20.1	77.925	297370000	28
tr|A0A1D6I6T8|A0A1D6I6T8_MAIZE Heat shock protein 90-2 OS=Zea mays OX=4577 GN=100272368 PE=3 SV=1;tr|A0A1D6I6T5|A0A1D6I6T5_MAIZE Heat shock protein 90-2 OS=Zea mays OX=4577 GN=100272368 PE=3 SV=1;tr|A0A1D6I6S9|A0A1D6I6S9_MAIZE Heat shock protein 90-2 OS=Ze	18.063	52.5	3	51	NaN	NaN	NaN	NaN	NaN	NaN	24.5405	NaN	NaN	NaN	NaN	NaN	NaN	NaN	NaN	NaN				3	6.2	6.2	80.273	360690000	7
tr|A0A1D6I6U2|A0A1D6I6U2_MAIZE Ribonuclease Z chloroplastic OS=Zea mays OX=4577 GN=ZEAMMB73_Zm00001d020900 PE=4 SV=1;tr|A0A1D6I6U1|A0A1D6I6U1_MAIZE Ribonuclease Z chloroplastic OS=Zea mays OX=4577 GN=ZEAMMB73_Zm00001d020900 PE=4 SV=1;tr|A0A1D6I6U0|A0A1D6I6	1.74	5	2	2	NaN	NaN	NaN	NaN	NaN	NaN	NaN	NaN	NaN	NaN	NaN	NaN	23.6579	NaN	NaN	23.6041				2	5	5	40.185	64639000	10
tr|B4G0Q9|B4G0Q9_MAIZE Abscisic acid stress ripening2 OS=Zea mays OX=4577 GN=100281622 PE=2 SV=1;tr|A0A1D6EHR9|A0A1D6EHR9_MAIZE Abscisic acid stress ripening2 OS=Zea mays OX=4577 GN=100281622 PE=4 SV=1;tr|A0A1D6EHR6|A0A1D6EHR6_MAIZE Abscisic acid stress ri	108.66	90.8	10	16	29.3503	27.0327	26.0344	23.4438	NaN	26.4881	22.9769	25.0325	26.3821	23.5747	22.4607	23.0484	NaN	24.2221	26.7075	26.2236	response to stimulus;response to stress			16	90.8	65.6	14.904	2069900000	105
tr|A0A1D6I8I2|A0A1D6I8I2_MAIZE FAD-dependent oxidoreductase family protein OS=Zea mays OX=4577 GN=ZEAMMB73_Zm00001d021138 PE=4 SV=1;tr|A0A1D6I8I4|A0A1D6I8I4_MAIZE FAD-dependent oxidoreductase family protein OS=Zea mays OX=4577 GN=ZEAMMB73_Zm00001d021138 PE	6.985	14.4	5	5	NaN	22.5314	NaN	NaN	NaN	NaN	NaN	NaN	NaN	NaN	NaN	NaN	NaN	NaN	NaN	NaN				5	14.4	14.4	51.919	129620000	8
tr|A0A1D6I963|A0A1D6I963_MAIZE Plant UBX domain-containing protein 8 OS=Zea mays OX=4577 GN=100274090 PE=4 SV=1;tr|B4FZ01|B4FZ01_MAIZE Plant UBX domain-containing protein 8 OS=Zea mays OX=4577 GN=100274090 PE=2 SV=1	27.937	12.8	4	4	24.0276	24.0986	NaN	NaN	NaN	NaN	NaN	NaN	NaN	24.9674	NaN	NaN	25.2741	NaN	NaN	NaN				4	12.8	12.8	55.471	593570000	44
tr|A0A1D6I9X2|A0A1D6I9X2_MAIZE Putative receptor-like protein kinase OS=Zea mays OX=4577 GN=100280671 PE=3 SV=1;tr|B4FLU1|B4FLU1_MAIZE Putative receptor-like protein kinase OS=Zea mays OX=4577 GN=100280671 PE=2 SV=1	2.3228	9.4	2	3	NaN	NaN	21.8513	NaN	NaN	NaN	NaN	NaN	NaN	NaN	NaN	NaN	NaN	NaN	NaN	NaN		adenyl nucleotide binding;adenyl ribonucleotide binding;ATP binding;binding;catalytic activity;kinase activity;nucleotide binding;phosphotransferase activity, alcohol group as acceptor;protein kinase activity;protein serine/threonine kinase activity;purine nucleotide binding;purine ribonucleoside triphosphate binding;purine ribonucleotide binding;ribonucleotide binding;transferase activity;transf…		3	9.4	7.3	41.637	25486000	1
tr|B6SKB7|B6SKB7_MAIZE Methylcrotonoyl-CoA carboxylase subunit alpha OS=Zea mays OX=4577 GN=100280665 PE=2 SV=1;tr|A0A1D6KFW8|A0A1D6KFW8_MAIZE Methylcrotonoyl-CoA carboxylase subunit alpha OS=Zea mays OX=4577 GN=100280665 PE=4 SV=1;tr|A0A1D6KFX3|A0A1D6KFX3	113.87	54.3	27	27	25.4314	24.0362	24.4411	25.0132	26.4473	26.3508	27.4696	27.2619	23.9317	24.5797	23.758	NaN	25.6388	26.3942	25.7969	25.8539	response to carbohydrate stimulus;response to chemical stimulus;response to disaccharide stimulus;response to fructose stimulus;response to hexose stimulus;response to monosaccharide stimulus;response to organic substance;response to stimulus;response to sucrose stimulus	adenyl nucleotide binding;adenyl ribonucleotide binding;ATP binding;binding;biotin carboxylase activity;catalytic activity;cation binding;cobalt ion binding;ion binding;ligase activity;ligase activity, forming carbon-nitrogen bonds;metal ion binding;nucleotide binding;purine nucleotide binding;purine ribonucleoside triphosphate binding;purine ribonucleotide binding;ribonucleotide binding;transiti…	cell part;cytoplasmic part;cytosolic part;cytosolic ribosome;intracellular non-membrane-bounded organelle;intracellular organelle;intracellular part;macromolecular complex;non-membrane-bounded organelle;organelle;ribonucleoprotein complex;ribosome	27	54.3	54.3	81.598	3997100000	201
tr|A0A1D6IBV9|A0A1D6IBV9_MAIZE Protein C2-DOMAIN ABA-RELATED 4 OS=Zea mays OX=4577 GN=ZEAMMB73_Zm00001d021529 PE=4 SV=1	44.256	27	3	3	24.5657	24.1112	NaN	NaN	NaN	NaN	NaN	NaN	NaN	NaN	23.6669	24.0894	NaN	NaN	24.3222	NaN				3	27	27	16.765	297000000	14
tr|A0A1D6ICB7|A0A1D6ICB7_MAIZE (S)-ureidoglycine aminohydrolase OS=Zea mays OX=4577 GN=ZEAMMB73_Zm00001d021558 PE=4 SV=1;tr|A0A1D6ICB9|A0A1D6ICB9_MAIZE (S)-ureidoglycine aminohydrolase OS=Zea mays OX=4577 GN=ZEAMMB73_Zm00001d021558 PE=4 SV=1;tr|A0A1D6ICB8|	1.8177	14.4	2	2	NaN	NaN	24.2824	NaN	NaN	NaN	NaN	NaN	NaN	NaN	NaN	24.633	NaN	NaN	NaN	NaN				2	14.4	14.4	38.778	523300000	10
tr|A0A1D6IEG8|A0A1D6IEG8_MAIZE Peptide chain release factor PrfB1 chloroplastic OS=Zea mays OX=4577 GN=ZEAMMB73_Zm00001d021715 PE=4 SV=1;tr|A0A1Q0ZZU5|A0A1Q0ZZU5_MAIZE Peptide chain release factor PrfB1 chloroplastic OS=Zea mays OX=4577 GN=ZEAMMB73_Zm00001	12.878	21.6	2	6	NaN	NaN	NaN	NaN	NaN	NaN	NaN	NaN	NaN	NaN	NaN	NaN	22.238	NaN	NaN	NaN				6	21.6	8.5	28.654	31190000	4
tr|A0A1D6IFD4|A0A1D6IFD4_MAIZE Peroxisomal isocitrate dehydrogenase [NADP] OS=Zea mays OX=4577 GN=103633296 PE=4 SV=1;tr|C0HGR8|C0HGR8_MAIZE Peroxisomal isocitrate dehydrogenase [NADP] OS=Zea mays OX=4577 GN=103633296 PE=2 SV=1;tr|A0A1D6IFF0|A0A1D6IFF0_MAI	4.1323	16.3	2	2	NaN	NaN	NaN	NaN	NaN	NaN	NaN	NaN	NaN	NaN	NaN	NaN	NaN	NaN	23.7519	23.6815	carboxylic acid metabolic process;cellular ketone metabolic process;cellular metabolic process;cellular process;isocitrate metabolic process;metabolic process;organic acid metabolic process;oxoacid metabolic process;small molecule metabolic process	catalytic activity;isocitrate dehydrogenase (NADP+) activity;isocitrate dehydrogenase activity;oxidoreductase activity;oxidoreductase activity, acting on CH-OH group of donors;oxidoreductase activity, acting on the CH-OH group of donors, NAD or NADP as acceptor		2	16.3	16.3	11.751	373660000	17
tr|A0A1D6II57|A0A1D6II57_MAIZE Peroxidase OS=Zea mays OX=4577 GN=ZEAMMB73_Zm00001d021965 PE=3 SV=1	5.5177	17.4	3	3	NaN	NaN	23.0728	NaN	NaN	NaN	NaN	NaN	NaN	NaN	NaN	23.1285	NaN	NaN	NaN	NaN				3	17.4	17.4	34.316	49879000	5
tr|A0A1D6IJ27|A0A1D6IJ27_MAIZE Mitochondrial import inner membrane translocase subunit Tim17 OS=Zea mays OX=4577 GN=ZEAMMB73_Zm00001d022083 PE=4 SV=1;tr|C0HHS3|C0HHS3_MAIZE Mitochondrial import inner membrane translocase subunit TIM17-2 OS=Zea mays OX=4577	110.92	15	3	3	NaN	23.5146	NaN	NaN	NaN	NaN	NaN	NaN	NaN	NaN	NaN	NaN	NaN	NaN	NaN	NaN	establishment of localization;establishment of localization in cell;establishment of protein localization;intracellular protein transport;intracellular transport;protein transport;transport	active transmembrane transporter activity;macromolecule transmembrane transporter activity;P-P-bond-hydrolysis-driven protein transmembrane transporter activity;P-P-bond-hydrolysis-driven transmembrane transporter activity;primary active transmembrane transporter activity;protein transmembrane transporter activity;protein transporter activity;substrate-specific transmembrane transporter activity;…	cell part;cytoplasmic part;integral to membrane;intracellular organelle part;intracellular part;intrinsic to membrane;macromolecular complex;membrane part;mitochondrial inner membrane presequence translocase complex;mitochondrial membrane part;mitochondrial part;organelle part;protein complex	3	15	15	24.012	358920000	33
tr|A0A1D6IJT4|A0A1D6IJT4_MAIZE Putative paramyosin OS=Zea mays OX=4577 GN=100304438 PE=4 SV=1	3.3338	4.1	2	2	NaN	NaN	NaN	NaN	NaN	NaN	NaN	NaN	22.3888	NaN	NaN	NaN	NaN	NaN	NaN	NaN				2	4.1	4.1	88.484	17280000	4
tr|A0A1D6IK52|A0A1D6IK52_MAIZE Calmodulin-binding transcription activator 2 OS=Zea mays OX=4577 GN=103633436 PE=4 SV=1;tr|A0A1D6IK60|A0A1D6IK60_MAIZE Calmodulin-binding transcription activator 2 OS=Zea mays OX=4577 GN=103633436 PE=4 SV=1;tr|A0A1D6IK65|A0A1	1.5207	3.9	2	2	NaN	NaN	NaN	NaN	NaN	NaN	23.9142	NaN	NaN	NaN	NaN	NaN	NaN	NaN	NaN	NaN				2	3.9	3.9	89.984	63262000	2
tr|A0A1D6IK81|A0A1D6IK81_MAIZE Uncharacterized protein OS=Zea mays OX=4577 GN=ZEAMMB73_Zm00001d022190 PE=4 SV=1;tr|A0A1D6IK90|A0A1D6IK90_MAIZE Uncharacterized protein OS=Zea mays OX=4577 GN=ZEAMMB73_Zm00001d022190 PE=4 SV=1;tr|A0A1D6IK82|A0A1D6IK82_MAIZE U	20.436	46	4	10	NaN	NaN	NaN	NaN	NaN	NaN	NaN	NaN	NaN	25.3385	NaN	NaN	NaN	NaN	NaN	NaN				10	46	26.3	30.93	1111500000	21
tr|B4FPR3|B4FPR3_MAIZE Chaperone DnaJ-domain superfamily protein OS=Zea mays OX=4577 GN=100272644 PE=2 SV=1;tr|B4FD81|B4FD81_MAIZE Chaperone DnaJ-domain superfamily protein OS=Zea mays OX=4577 GN=100272644 PE=2 SV=1;tr|A0A1D6IKC3|A0A1D6IKC3_MAIZE Chaperone	5.7562	22.1	2	2	NaN	NaN	NaN	NaN	NaN	NaN	NaN	NaN	NaN	NaN	NaN	NaN	23.3995	NaN	NaN	NaN				2	22.1	22.1	23.135	38226000	3
tr|A0A1D6IKI4|A0A1D6IKI4_MAIZE VH1-interacting kinase OS=Zea mays OX=4577 GN=100382164 PE=3 SV=1;tr|C0P506|C0P506_MAIZE VH1-interacting kinase OS=Zea mays OX=4577 GN=100382164 PE=2 SV=1	16.52	11.6	4	4	23.1722	NaN	23.1893	NaN	NaN	NaN	NaN	NaN	NaN	NaN	NaN	NaN	NaN	NaN	NaN	NaN		adenyl nucleotide binding;adenyl ribonucleotide binding;ATP binding;binding;catalytic activity;kinase activity;nucleotide binding;phosphotransferase activity, alcohol group as acceptor;protein kinase activity;purine nucleotide binding;purine ribonucleoside triphosphate binding;purine ribonucleotide binding;ribonucleotide binding;transferase activity;transferase activity, transferring phosphorus-c…		4	11.6	11.6	49.104	299080000	19
tr|A0A1D6IL23|A0A1D6IL23_MAIZE Proteasome subunit alpha type OS=Zea mays OX=4577 GN=ZEAMMB73_Zm00001d022316 PE=3 SV=1;tr|A0A1D6IL24|A0A1D6IL24_MAIZE Proteasome endopeptidase complex OS=Zea mays OX=4577 GN=ZEAMMB73_Zm00001d022316 PE=3 SV=1	21.963	56.7	1	19	NaN	NaN	NaN	NaN	NaN	NaN	NaN	NaN	NaN	NaN	NaN	NaN	NaN	22.3939	NaN	NaN				4	17.1	4.4	29.955	24941000	1
tr|A0A1D6ILX8|A0A1D6ILX8_MAIZE Ribosomal protein S5 domain 2-like superfamily protein OS=Zea mays OX=4577 GN=ZEAMMB73_Zm00001d022386 PE=3 SV=1	12.776	29.2	8	8	NaN	NaN	NaN	NaN	23.3975	NaN	NaN	23.4989	NaN	NaN	NaN	NaN	NaN	NaN	NaN	NaN				8	29.2	29.2	45.377	436460000	25
tr|A0A1D6IP14|A0A1D6IP14_MAIZE Nicotianamine synthase5 OS=Zea mays OX=4577 GN=ZEAMMB73_Zm00001d022557 PE=4 SV=1	18.682	22	2	5	22.1114	NaN	NaN	NaN	NaN	NaN	NaN	NaN	NaN	NaN	NaN	22.2273	NaN	NaN	NaN	NaN				4	20.1	8.5	38.931	22198000	5
sp|P93648|LONM_MAIZE Lon protease homolog, mitochondrial OS=Zea mays OX=4577 GN=LON2 PE=1 SV=1;tr|A0A1D6IP30|A0A1D6IP30_MAIZE Lon protease homolog, mitochondrial OS=Zea mays OX=4577 GN=ZEAMMB73_Zm00001d022560 PE=3 SV=1;tr|A0A1D6IP29|A0A1D6IP29_MAIZE Lon pr	38.593	23	3	15	NaN	NaN	NaN	NaN	NaN	NaN	NaN	NaN	NaN	NaN	NaN	NaN	NaN	23.8751	NaN	NaN	biological regulation;catabolic process;cellular catabolic process;cellular component assembly;cellular component assembly at cellular level;cellular component organization;cellular component organization at cellular level;cellular component organization or biogenesis;cellular component organization or biogenesis at cellular level;cellular macromolecular complex assembly;cellular macromolecular c…	adenyl nucleotide binding;adenyl ribonucleotide binding;ATP binding;ATPase activity;ATPase activity, coupled;ATP-dependent peptidase activity;binding;catalytic activity;DNA binding;endopeptidase activity;hydrolase activity;hydrolase activity, acting on acid anhydrides;hydrolase activity, acting on acid anhydrides, in phosphorus-containing anhydrides;nucleic acid binding;nucleoside-triphosphatase …	cell part;cytoplasmic part;intracellular organelle lumen;intracellular organelle part;intracellular part;membrane-enclosed lumen;mitochondrial matrix;mitochondrial part;organelle lumen;organelle part	15	23	6.8	105.66	300490000	26
tr|A0A1D6IP61|A0A1D6IP61_MAIZE Ubiquitin-activating enzyme E1 2 OS=Zea mays OX=4577 GN=103633603 PE=3 SV=1	3.046	13.2	4	9	NaN	NaN	NaN	NaN	NaN	NaN	NaN	NaN	NaN	NaN	NaN	22.8415	NaN	NaN	NaN	NaN				4	6.6	6.6	118.07	499230000	11
tr|A0A1D6IPP9|A0A1D6IPP9_MAIZE Plastid transcriptionally active chromosome 2-like protein OS=Zea mays OX=4577 GN=103633614 PE=4 SV=1;tr|A0A1D6IPQ0|A0A1D6IPQ0_MAIZE Plastid transcriptionally active chromosome 2-like protein OS=Zea mays OX=4577 GN=103633614	3.3278	4	3	3	NaN	NaN	NaN	NaN	NaN	NaN	NaN	NaN	NaN	NaN	NaN	22.0164	NaN	NaN	NaN	21.9478				3	4	4	97.839	77243000	3
tr|B4G038|B4G038_MAIZE Homoserine dehydrogenase OS=Zea mays OX=4577 GN=100282632 PE=2 SV=1;tr|A0A1D6IRD6|A0A1D6IRD6_MAIZE Homoserine dehydrogenase OS=Zea mays OX=4577 GN=100282632 PE=3 SV=1;tr|A0A1D6IRD8|A0A1D6IRD8_MAIZE Homoserine dehydrogenase OS=Zea may	4.5966	18.2	4	4	NaN	23.3411	23.8272	NaN	23.7836	NaN	NaN	NaN	NaN	NaN	NaN	NaN	NaN	NaN	NaN	NaN	amine biosynthetic process;amine metabolic process;aspartate family amino acid biosynthetic process;aspartate family amino acid metabolic process;biosynthetic process;branched chain family amino acid biosynthetic process;branched chain family amino acid metabolic process;carboxylic acid biosynthetic process;carboxylic acid metabolic process;cellular amine metabolic process;cellular amino acid bio…	binding;catalytic activity;coenzyme binding;cofactor binding;homoserine dehydrogenase activity;NADP binding;nucleotide binding;oxidoreductase activity;oxidoreductase activity, acting on CH-OH group of donors;oxidoreductase activity, acting on the CH-OH group of donors, NAD or NADP as acceptor	cell part;cytoplasmic part;cytosol;intracellular part	4	18.2	18.2	40.593	187580000	17
tr|B4FRX2|B4FRX2_MAIZE ACT domain-containing protein ACR12 OS=Zea mays OX=4577 GN=ZEAMMB73_Zm00001d023423 PE=2 SV=1;tr|A0A1D6IT94|A0A1D6IT94_MAIZE ACT domain-containing protein ACR12 OS=Zea mays OX=4577 GN=ZEAMMB73_Zm00001d023423 PE=4 SV=1;tr|A0A1D6IT93|A0	11.404	35.1	3	7	24.0056	NaN	NaN	NaN	NaN	NaN	NaN	NaN	NaN	NaN	22.649	NaN	NaN	NaN	22.7297	NaN	metabolic process	amine binding;amino acid binding;binding;carboxylic acid binding		3	14	14	30.035	85377000	18
tr|A0A1D6IUH6|A0A1D6IUH6_MAIZE Zinc finger CCCH domain-containing protein 67 OS=Zea mays OX=4577 GN=ZEAMMB73_Zm00001d023636 PE=4 SV=1	7.6839	11.3	3	3	NaN	NaN	NaN	NaN	NaN	NaN	NaN	NaN	NaN	NaN	21.9382	NaN	NaN	NaN	NaN	NaN				3	11.3	11.3	56.424	107870000	16
tr|A0A1D6IV37|A0A1D6IV37_MAIZE Alpha-galactosidase OS=Zea mays OX=4577 GN=ZEAMMB73_Zm00001d023715 PE=3 SV=1;tr|A0A1D6IV27|A0A1D6IV27_MAIZE Alpha-galactosidase OS=Zea mays OX=4577 GN=ZEAMMB73_Zm00001d023715 PE=3 SV=1;tr|A0A1D6IV20|A0A1D6IV20_MAIZE Melibiase	19.109	8.6	3	3	NaN	NaN	NaN	NaN	NaN	NaN	23.0447	NaN	NaN	NaN	NaN	NaN	NaN	NaN	NaN	NaN	carbohydrate metabolic process;metabolic process;primary metabolic process	catalytic activity;hydrolase activity;hydrolase activity, acting on glycosyl bonds;hydrolase activity, hydrolyzing O-glycosyl compounds	cell part;cell wall;external encapsulating structure	3	8.6	8.6	62.282	205720000	21
tr|A0A1D6IWC3|A0A1D6IWC3_MAIZE Protein TIC 40 chloroplastic OS=Zea mays OX=4577 GN=ZEAMMB73_Zm00001d023857 PE=4 SV=1	284.35	42.1	2	9	24.9926	25.0365	NaN	NaN	NaN	25.7944	NaN	NaN	25.2832	NaN	NaN	NaN	NaN	NaN	NaN	NaN				6	39.8	19.3	18.672	274380000	22
tr|A0A1D6IWU4|A0A1D6IWU4_MAIZE Purple acid phosphatase OS=Zea mays OX=4577 GN=ZEAMMB73_Zm00001d023918 PE=3 SV=1;tr|A0A1D6IWU3|A0A1D6IWU3_MAIZE Purple acid phosphatase OS=Zea mays OX=4577 GN=ZEAMMB73_Zm00001d023918 PE=3 SV=1	8.2139	10.5	3	3	24.9506	NaN	NaN	NaN	NaN	NaN	NaN	NaN	NaN	NaN	NaN	NaN	NaN	NaN	NaN	NaN				3	10.5	10.5	43.56	272460000	7
tr|A0A1D6IY31|A0A1D6IY31_MAIZE Diacylglycerol kinase OS=Zea mays OX=4577 GN=100127508 PE=3 SV=1;tr|A0A1D6IY33|A0A1D6IY33_MAIZE Diacylglycerol kinase OS=Zea mays OX=4577 GN=100127508 PE=3 SV=1;tr|A8QM11|A8QM11_MAIZE diacylglycerol kinase OS=Zea mays OX=4577	8.1405	6.3	2	2	NaN	NaN	NaN	NaN	NaN	NaN	NaN	NaN	NaN	NaN	NaN	21.8131	NaN	NaN	NaN	NaN	activation of protein kinase activity;activation of protein kinase C activity by G-protein coupled receptor protein signaling pathway;biological regulation;cell surface receptor linked signaling pathway;cellular process;cellular response to stimulus;G-protein coupled receptor protein signaling pathway;positive regulation of catalytic activity;positive regulation of kinase activity;positive regula…	adenyl nucleotide binding;adenyl ribonucleotide binding;ATP binding;binding;catalytic activity;diacylglycerol kinase activity;kinase activity;NAD+ kinase activity;nucleotide binding;phosphotransferase activity, alcohol group as acceptor;purine nucleotide binding;purine ribonucleoside triphosphate binding;purine ribonucleotide binding;ribonucleotide binding;transferase activity;transferase activit…		2	6.3	6.3	52.538	105470000	21
tr|A0A1D6IYL7|A0A1D6IYL7_MAIZE AICARFT/IMPCHase bienzyme family protein OS=Zea mays OX=4577 GN=ZEAMMB73_Zm00001d024301 PE=3 SV=1;tr|A0A1D6IYM1|A0A1D6IYM1_MAIZE AICARFT/IMPCHase bienzyme family protein OS=Zea mays OX=4577 GN=ZEAMMB73_Zm00001d024301 PE=3 SV=	6.0963	19	5	8	NaN	NaN	NaN	NaN	NaN	NaN	NaN	NaN	NaN	NaN	NaN	NaN	24.7347	NaN	NaN	NaN				5	13.9	13.9	65.46	170620000	7
tr|A0A1D6IYV8|A0A1D6IYV8_MAIZE 26S proteasome non-ATPase regulatory subunit 1 homolog OS=Zea mays OX=4577 GN=ZEAMMB73_Zm00001d024342 PE=3 SV=1	28.135	15	3	10	NaN	NaN	NaN	NaN	NaN	NaN	NaN	NaN	NaN	NaN	NaN	NaN	NaN	21.3907	NaN	NaN				6	9.7	6.4	107.06	122420000	12
tr|C0PHV9|C0PHV9_MAIZE Regulator of Vps4 activity in the MVB pathway protein OS=Zea mays OX=4577 GN=103641204 PE=2 SV=1;tr|A0A1D6IZ80|A0A1D6IZ80_MAIZE Regulator of Vps4 activity in the MVB pathway protein OS=Zea mays OX=4577 GN=103641204 PE=4 SV=1;tr|A0A1D	8.1125	13.2	4	5	NaN	NaN	NaN	NaN	NaN	NaN	NaN	NaN	NaN	NaN	NaN	22.8813	NaN	22.5207	21.9838	22.7412				4	11	11	56.92	199190000	19
tr|A0A1D6J287|A0A1D6J287_MAIZE Uncharacterized protein OS=Zea mays OX=4577 GN=ZEAMMB73_Zm00001d024833 PE=4 SV=1	2.403	11.5	2	2	NaN	NaN	NaN	NaN	NaN	NaN	NaN	25.1215	NaN	NaN	NaN	NaN	NaN	NaN	NaN	NaN				2	11.5	11.5	35.874	257980000	2
tr|A0A1D6J2V0|A0A1D6J2V0_MAIZE Fatty acid amide hydrolase OS=Zea mays OX=4577 GN=ZEAMMB73_Zm00001d024936 PE=4 SV=1	6.8985	11.3	4	4	NaN	NaN	NaN	NaN	NaN	NaN	NaN	23.3135	NaN	NaN	NaN	NaN	NaN	NaN	NaN	NaN				4	11.3	11.3	75.611	166900000	9
tr|B6SU17|B6SU17_MAIZE Phosphoglycerate mutase-like protein OS=Zea mays OX=4577 GN=100281287 PE=2 SV=1;tr|B4F850|B4F850_MAIZE Phosphoglycerate mutase-like protein OS=Zea mays OX=4577 GN=100191250 PE=2 SV=1;tr|A0A1D6J381|A0A1D6J381_MAIZE Phosphoglycerate mu	28.774	26.8	7	7	24.3376	24.3713	25.0804	NaN	NaN	24.8008	NaN	NaN	24.6472	24.3371	NaN	25.2624	NaN	NaN	NaN	NaN				7	26.8	26.8	31.832	695870000	31
tr|K7TSQ4|K7TSQ4_MAIZE Carboxypeptidase OS=Zea mays OX=4577 GN=103641571 PE=3 SV=1;tr|A0A1D6J5H2|A0A1D6J5H2_MAIZE Carboxypeptidase OS=Zea mays OX=4577 GN=103641571 PE=3 SV=1;tr|A0A1D6J5H4|A0A1D6J5H4_MAIZE Carboxypeptidase OS=Zea mays OX=4577 GN=103641571 P	11.958	12.3	5	5	24.8634	24.7094	NaN	NaN	NaN	NaN	NaN	NaN	NaN	NaN	NaN	NaN	NaN	NaN	NaN	NaN		carboxypeptidase activity;catalytic activity;exopeptidase activity;hydrolase activity;peptidase activity;peptidase activity, acting on L-amino acid peptides;serine hydrolase activity;serine-type carboxypeptidase activity;serine-type exopeptidase activity;serine-type peptidase activity		5	12.3	12.3	58.23	405000000	15
tr|A0A1D6J6Y6|A0A1D6J6Y6_MAIZE Peroxidase OS=Zea mays OX=4577 GN=100382033 PE=3 SV=1;tr|C0P3T3|C0P3T3_MAIZE Peroxidase OS=Zea mays OX=4577 GN=100382033 PE=2 SV=1;tr|B4G1R4|B4G1R4_MAIZE Peroxidase OS=Zea mays OX=4577 GN=100216859 PE=2 SV=1;tr|A0A1D6J6Y4|A0A	111.68	33.5	9	9	NaN	NaN	24.3389	NaN	NaN	NaN	NaN	23.4604	NaN	NaN	NaN	NaN	NaN	NaN	NaN	NaN	response to chemical stimulus;response to oxidative stress;response to stimulus;response to stress	antioxidant activity;binding;catalytic activity;cation binding;heme binding;ion binding;iron ion binding;metal ion binding;oxidoreductase activity;oxidoreductase activity, acting on peroxide as acceptor;peroxidase activity;tetrapyrrole binding;transition metal ion binding		9	33.5	33.5	36.402	1932400000	93
tr|A0A1D6J8A2|A0A1D6J8A2_MAIZE Sterile alpha motif (SAM) domain-containing protein OS=Zea mays OX=4577 GN=100283603 PE=4 SV=1;tr|B6TJV2|B6TJV2_MAIZE SAM domain family protein OS=Zea mays OX=4577 GN=100283603 PE=2 SV=1;tr|A0A1D6J895|A0A1D6J895_MAIZE Sterile	43.045	19.6	3	4	NaN	NaN	NaN	NaN	NaN	NaN	NaN	NaN	NaN	NaN	22.199	NaN	NaN	NaN	NaN	NaN				4	19.6	16.5	35.477	104750000	17
tr|A0A1D6JDW1|A0A1D6JDW1_MAIZE Nuclear pore complex protein NUP88 OS=Zea mays OX=4577 GN=100272301 PE=4 SV=1;tr|A0A1D6JDV9|A0A1D6JDV9_MAIZE Nuclear pore complex protein NUP88 OS=Zea mays OX=4577 GN=100272301 PE=4 SV=1;tr|A0A1D6JDV3|A0A1D6JDV3_MAIZE Nuclear	6.3475	12.1	4	4	NaN	NaN	NaN	NaN	NaN	NaN	NaN	NaN	NaN	NaN	NaN	NaN	NaN	22.6336	NaN	NaN				4	12.1	12.1	52.695	135150000	29
tr|K7TSA0|K7TSA0_MAIZE 26S proteasome non-ATPase regulatory subunit 1 homolog OS=Zea mays OX=4577 GN=103642042 PE=3 SV=1;tr|A0A1D6JDW4|A0A1D6JDW4_MAIZE 26S proteasome non-ATPase regulatory subunit 1 homolog OS=Zea mays OX=4577 GN=103642042 PE=3 SV=1;tr|A0A	146.35	23.9	5	18	NaN	NaN	NaN	NaN	NaN	NaN	NaN	23.2031	NaN	NaN	NaN	NaN	NaN	NaN	NaN	NaN	biological regulation;regulation of biological process;regulation of catabolic process;regulation of macromolecule metabolic process;regulation of metabolic process;regulation of primary metabolic process;regulation of protein catabolic process;regulation of protein metabolic process	enzyme regulator activity	cell part;intracellular part;macromolecular complex;proteasome complex;protein complex	18	23.9	6.3	109.67	150940000	27
tr|A0A1D6JE05|A0A1D6JE05_MAIZE Coproporphyrinogen III oxidase2 OS=Zea mays OX=4577 GN=ZEAMMB73_Zm00001d026277 PE=4 SV=1;tr|A0A1D6JE04|A0A1D6JE04_MAIZE Coproporphyrinogen III oxidase2 OS=Zea mays OX=4577 GN=ZEAMMB73_Zm00001d026277 PE=4 SV=1	2.4641	69.3	2	22	NaN	NaN	NaN	NaN	NaN	NaN	NaN	NaN	NaN	NaN	NaN	NaN	NaN	NaN	NaN	23.3949				2	6	6	37.878	63509000	6
tr|A0A1D6JEH7|A0A1D6JEH7_MAIZE Putative leucine-rich repeat receptor-like protein kinase family protein OS=Zea mays OX=4577 GN=103642057 PE=4 SV=1;tr|A0A1D6JEH5|A0A1D6JEH5_MAIZE Putative leucine-rich repeat receptor-like protein kinase family protein OS=Ze	323.31	13.5	8	8	25.0124	NaN	NaN	NaN	NaN	NaN	NaN	24.93	23.8346	25.4551	NaN	NaN	NaN	NaN	NaN	NaN		adenyl nucleotide binding;adenyl ribonucleotide binding;ATP binding;binding;catalytic activity;kinase activity;nucleotide binding;phosphotransferase activity, alcohol group as acceptor;protein kinase activity;protein serine/threonine kinase activity;purine nucleotide binding;purine ribonucleoside triphosphate binding;purine ribonucleotide binding;ribonucleotide binding;transferase activity;transf…		8	13.5	13.5	111.56	750590000	40
tr|A0A1D6JHI0|A0A1D6JHI0_MAIZE Plant cysteine oxidase 3 OS=Zea mays OX=4577 GN=100502253 PE=4 SV=1;tr|A0A1D6JHH8|A0A1D6JHH8_MAIZE Plant cysteine oxidase 3 OS=Zea mays OX=4577 GN=100502253 PE=4 SV=1;tr|A0A1D6JHH7|A0A1D6JHH7_MAIZE Plant cysteine oxidase 3 OS	2.8389	13.8	2	2	NaN	21.6923	NaN	NaN	NaN	NaN	NaN	NaN	NaN	NaN	NaN	NaN	NaN	NaN	NaN	NaN				2	13.8	13.8	28.396	17810000	2
tr|A0A1D6JIB7|A0A1D6JIB7_MAIZE K(+) efflux antiporter 2 chloroplastic OS=Zea mays OX=4577 GN=ZEAMMB73_Zm00001d026645 PE=4 SV=1;tr|A0A1D6JIC9|A0A1D6JIC9_MAIZE K(+) efflux antiporter 2 chloroplastic OS=Zea mays OX=4577 GN=ZEAMMB73_Zm00001d026645 PE=4 SV=1;tr	1.7085	11.7	2	5	NaN	NaN	NaN	NaN	NaN	NaN	NaN	NaN	NaN	NaN	NaN	NaN	NaN	NaN	NaN	21.7243	cation transport;establishment of localization;ion transport;metal ion transport;monovalent inorganic cation transport;potassium ion transport;transport	active transmembrane transporter activity;antiporter activity;cation transmembrane transporter activity;hydrogen ion transmembrane transporter activity;inorganic cation transmembrane transporter activity;ion transmembrane transporter activity;monovalent inorganic cation transmembrane transporter activity;secondary active transmembrane transporter activity;solute:cation antiporter activity;solute:…	cell part;integral to membrane;intrinsic to membrane;membrane part	2	3.9	3.9	74.302	35234000	1
tr|A0A1D6JK35|A0A1D6JK35_MAIZE Signal recognition particle protein subunit 9 OS=Zea mays OX=4577 GN=100191673 PE=4 SV=1;tr|B4F9Q4|B4F9Q4_MAIZE Signal recognition particle protein subunit 9 OS=Zea mays OX=4577 GN=100191673 PE=2 SV=1;tr|A0A1D6JK26|A0A1D6JK26	18.354	8.2	4	4	NaN	NaN	NaN	NaN	NaN	NaN	23.1449	NaN	NaN	NaN	NaN	NaN	NaN	NaN	NaN	NaN	cellular process;cotranslational protein targeting to membrane;establishment of localization;establishment of localization in cell;establishment of protein localization;establishment of protein localization in endoplasmic reticulum;establishment of protein localization to organelle;establishment of protein localization to vacuole;Golgi vesicle transport;intracellular protein transport;intracellul…	binding;catalytic activity;GTP binding;GTPase activity;guanyl nucleotide binding;guanyl ribonucleotide binding;hydrolase activity;hydrolase activity, acting on acid anhydrides;hydrolase activity, acting on acid anhydrides, in phosphorus-containing anhydrides;nucleoside-triphosphatase activity;nucleotide binding;purine nucleotide binding;purine ribonucleoside triphosphate binding;purine ribonucleo…	cell part;cytoplasmic part;endoplasmic reticulum part;intracellular organelle part;intracellular part;macromolecular complex;membrane part;organelle part;protein complex;receptor complex;signal recognition particle receptor complex	4	8.2	8.2	66.508	223420000	18
sp|B6TRH4|RIBD_MAIZE Riboflavin biosynthesis protein PYRD, chloroplastic OS=Zea mays OX=4577 GN=PYRD PE=2 SV=1;tr|A0A1D6JLB3|A0A1D6JLB3_MAIZE Pyrimidine deaminase1 OS=Zea mays OX=4577 GN=100191772 PE=4 SV=1	2.9678	21.7	5	5	NaN	NaN	NaN	NaN	NaN	NaN	NaN	NaN	23.7542	NaN	NaN	24.1224	NaN	NaN	NaN	NaN	biosynthetic process;cellular biosynthetic process;cellular metabolic process;cellular nitrogen compound biosynthetic process;cellular nitrogen compound metabolic process;cellular process;flavin-containing compound biosynthetic process;flavin-containing compound metabolic process;heterocycle biosynthetic process;heterocycle metabolic process;metabolic process;nitrogen compound metabolic process;o…	binding;catalytic activity;cation binding;deaminase activity;diaminohydroxyphosphoribosylaminopyrimidine deaminase activity;hydrolase activity;hydrolase activity, acting on carbon-nitrogen (but not peptide) bonds;hydrolase activity, acting on carbon-nitrogen (but not peptide) bonds, in cyclic amidines;ion binding;metal ion binding;transition metal ion binding;zinc ion binding	cell part;chloroplast part;chloroplast stroma;cytoplasmic part;intracellular organelle part;intracellular part;organelle part;plastid part;plastid stroma	5	21.7	21.7	41.833	56887000	4
tr|A0A1D6JM99|A0A1D6JM99_MAIZE Heavy metal transport/detoxification superfamily protein OS=Zea mays OX=4577 GN=107403160 PE=4 SV=1	41.415	11.2	2	2	23.0557	22.8129	NaN	NaN	NaN	NaN	NaN	NaN	NaN	NaN	NaN	NaN	NaN	NaN	NaN	NaN				2	11.2	11.2	24.892	224510000	13
tr|A0A1D6JMV2|A0A1D6JMV2_MAIZE 40S ribosomal protein SA OS=Zea mays OX=4577 GN=ZEAMMB73_Zm00001d027527 PE=3 SV=1	2.8092	44.7	2	18	NaN	24.2779	23.0081	NaN	NaN	23.2763	NaN	NaN	NaN	NaN	NaN	NaN	NaN	NaN	NaN	NaN				2	5.3	5.3	41.316	100410000	7
tr|A0A1D6JN64|A0A1D6JN64_MAIZE Mitochondrial outer membrane protein porin 4 OS=Zea mays OX=4577 GN=ZEAMMB73_Zm00001d027580 PE=4 SV=1;tr|B6T1E3|B6T1E3_MAIZE Mitochondrial outer membrane protein porin 4 OS=Zea mays OX=4577 GN=ZEAMMB73_Zm00001d048362 PE=2 SV=	16.103	40.3	9	9	24.2329	24.8903	NaN	24.1944	24.4386	24.1359	NaN	24.1544	NaN	NaN	NaN	NaN	NaN	NaN	NaN	NaN	cellular process;establishment of localization;transmembrane transport;transport		cell part;cytoplasmic part;intracellular organelle part;intracellular part;membrane;mitochondrial membrane;mitochondrial outer membrane;mitochondrial part;organelle membrane;organelle outer membrane;organelle part;outer membrane	9	40.3	40.3	30.433	708350000	27
tr|A0A1D6JNR0|A0A1D6JNR0_MAIZE Methyltransferase-like protein 1 OS=Zea mays OX=4577 GN=ZEAMMB73_Zm00001d027671 PE=3 SV=1	5.619	10.4	4	4	NaN	NaN	NaN	NaN	NaN	NaN	NaN	NaN	NaN	NaN	NaN	NaN	NaN	23.0716	21.5987	NaN				4	10.4	10.4	91.28	97956000	15
tr|A0A1D6JNZ1|A0A1D6JNZ1_MAIZE Ribosomal large subunit pseudouridine synthase B OS=Zea mays OX=4577 GN=ZEAMMB73_Zm00001d027714 PE=4 SV=1;tr|A0A1D6JNZ0|A0A1D6JNZ0_MAIZE Ribosomal large subunit pseudouridine synthase B OS=Zea mays OX=4577 GN=ZEAMMB73_Zm00001	2.2175	17.8	3	3	NaN	NaN	NaN	NaN	NaN	NaN	NaN	NaN	NaN	NaN	NaN	NaN	22.8194	NaN	NaN	NaN				3	17.8	17.8	31.886	19746000	6
tr|A0A1D6JP01|A0A1D6JP01_MAIZE La-related protein 1C OS=Zea mays OX=4577 GN=ZEAMMB73_Zm00001d027719 PE=4 SV=2	3.396	16.3	2	2	25.3523	NaN	NaN	NaN	NaN	NaN	NaN	NaN	NaN	24.191	NaN	NaN	24.5683	NaN	NaN	NaN				2	16.3	16.3	26.914	366840000	22
tr|B6TN68|B6TN68_MAIZE RNA-binding (RRM/RBD/RNP motifs) family protein OS=Zea mays OX=4577 GN=100283928 PE=2 SV=1;tr|A0A1D6FUU3|A0A1D6FUU3_MAIZE RNA-binding (RRM/RBD/RNP motifs) family protein OS=Zea mays OX=4577 GN=100283928 PE=4 SV=1	50.574	58.3	5	11	23.3541	NaN	NaN	NaN	NaN	NaN	24.0466	24.4089	NaN	NaN	21.8461	NaN	23.7363	24.4597	22.724	23.5492	cellular macromolecule metabolic process;cellular metabolic process;cellular nitrogen compound metabolic process;cellular process;macromolecule metabolic process;metabolic process;nitrogen compound metabolic process;nucleic acid metabolic process;nucleobase-containing compound metabolic process;primary metabolic process;RNA metabolic process;RNA processing	binding;nucleic acid binding;nucleotide binding;RNA binding	cell part;cytoplasm;intracellular membrane-bounded organelle;intracellular organelle;intracellular part;membrane-bounded organelle;nucleus;organelle	11	58.3	40.7	21.99	486860000	30
tr|A0A1D6JQM8|A0A1D6JQM8_MAIZE 40S ribosomal protein SA OS=Zea mays OX=4577 GN=ZEAMMB73_Zm00001d027919 PE=3 SV=1	2.1204	42.3	2	16	NaN	NaN	NaN	NaN	NaN	NaN	NaN	NaN	NaN	NaN	NaN	22.8505	NaN	NaN	NaN	NaN				2	5.2	5.2	33.725	157460000	8
tr|C0PIV7|C0PIV7_MAIZE Tetratricopeptide repeat (TPR)-like superfamily protein OS=Zea mays OX=4577 GN=100383763 PE=2 SV=1;tr|A0A1D6JRF8|A0A1D6JRF8_MAIZE Tetratricopeptide repeat (TPR)-like superfamily protein OS=Zea mays OX=4577 GN=100383763 PE=4 SV=1;tr|A	7.3204	17.5	2	5	NaN	NaN	NaN	NaN	NaN	NaN	NaN	NaN	NaN	NaN	22.125	NaN	NaN	NaN	NaN	NaN				2	6.4	6.4	39.911	96542000	5
tr|A0A1D6JS16|A0A1D6JS16_MAIZE Cyclin-related OS=Zea mays OX=4577 GN=ZEAMMB73_Zm00001d028097 PE=4 SV=1;tr|A0A1D6JS15|A0A1D6JS15_MAIZE Cyclin-related OS=Zea mays OX=4577 GN=ZEAMMB73_Zm00001d028097 PE=4 SV=1	93.481	13.6	3	3	22.9918	NaN	NaN	NaN	NaN	NaN	NaN	NaN	NaN	NaN	NaN	NaN	NaN	NaN	NaN	NaN				3	13.6	13.6	37.75	235550000	30
tr|A0A1D6JS46|A0A1D6JS46_MAIZE Peptidyl-prolyl cis-trans isomerase CYP65 OS=Zea mays OX=4577 GN=103632256 PE=4 SV=1;tr|A0A1D6JS41|A0A1D6JS41_MAIZE Peptidyl-prolyl cis-trans isomerase CYP65 OS=Zea mays OX=4577 GN=103632256 PE=4 SV=1;tr|A0A1D6JS43|A0A1D6JS43	2.501	7.7	2	2	NaN	NaN	NaN	NaN	NaN	NaN	NaN	22.3584	NaN	NaN	NaN	NaN	NaN	NaN	NaN	NaN				2	7.7	7.7	43.32	120750000	11
tr|A0A1D6JS55|A0A1D6JS55_MAIZE SURF1-like protein OS=Zea mays OX=4577 GN=ZEAMMB73_Zm00001d028113 PE=3 SV=1;tr|A0A1D6FGN8|A0A1D6FGN8_MAIZE SURF1-like protein OS=Zea mays OX=4577 GN=ZEAMMB73_Zm00001d008918 PE=3 SV=1	11.034	25.6	4	4	NaN	NaN	NaN	NaN	NaN	23.5403	NaN	NaN	NaN	NaN	NaN	NaN	NaN	NaN	NaN	NaN				4	25.6	25.6	42.172	222640000	36
tr|A0A1D6JSI0|A0A1D6JSI0_MAIZE Uncharacterized protein OS=Zea mays OX=4577 GN=ZEAMMB73_Zm00001d028172 PE=4 SV=1	26.666	25.9	5	6	NaN	24.6644	NaN	NaN	NaN	NaN	NaN	NaN	NaN	NaN	NaN	NaN	NaN	24.1464	NaN	24.9626				5	24.1	24.1	42.563	62601000	7
tr|A0A1D6JSI1|A0A1D6JSI1_MAIZE FRIGIDA-like protein OS=Zea mays OX=4577 GN=100279474 PE=3 SV=1;tr|B7ZYB8|B7ZYB8_MAIZE FRIGIDA-like protein OS=Zea mays OX=4577 GN=100279474 PE=2 SV=1	6.4938	19.6	6	6	NaN	NaN	NaN	NaN	NaN	NaN	23.2935	23.461	NaN	NaN	NaN	NaN	NaN	NaN	NaN	NaN				6	19.6	19.6	50.309	296210000	16
tr|A0A1D6JZ55|A0A1D6JZ55_MAIZE Fatty acid desaturase8 OS=Zea mays OX=4577 GN=ZEAMMB73_Zm00001d028742 PE=4 SV=1	2.5801	10.1	2	2	NaN	NaN	24.099	NaN	23.9923	24.0759	NaN	NaN	NaN	NaN	NaN	24.3525	NaN	NaN	NaN	NaN				2	10.1	10.1	49.617	297690000	7
tr|A0A1D6JZD8|A0A1D6JZD8_MAIZE Asparagine synthetase3 OS=Zea mays OX=4577 GN=100192350 PE=4 SV=1;tr|A0A1D6JZD6|A0A1D6JZD6_MAIZE Asparagine synthetase3 OS=Zea mays OX=4577 GN=100192350 PE=4 SV=1;tr|B6ETR5|B6ETR5_MAIZE Asparagine synthetase OS=Zea mays OX=45	139.03	47.3	7	22	NaN	NaN	NaN	23.9164	NaN	NaN	27.4583	26.7827	NaN	NaN	NaN	NaN	NaN	NaN	NaN	NaN	amine biosynthetic process;amine metabolic process;asparagine biosynthetic process;asparagine metabolic process;aspartate family amino acid biosynthetic process;aspartate family amino acid metabolic process;biosynthetic process;carboxylic acid biosynthetic process;carboxylic acid metabolic process;cellular amine metabolic process;cellular amino acid biosynthetic process;cellular amino acid metabo…	asparagine synthase (glutamine-hydrolyzing) activity;carbon-nitrogen ligase activity, with glutamine as amido-N-donor;catalytic activity;ligase activity;ligase activity, forming carbon-nitrogen bonds		22	47.3	20.6	63.443	939020000	61
tr|A0A1D6JZF8|A0A1D6JZF8_MAIZE 6-phosphofructo-2-kinase/fructose-26-bisphosphatase OS=Zea mays OX=4577 GN=103634503 PE=4 SV=1;tr|A0A1D6JZG1|A0A1D6JZG1_MAIZE 6-phosphofructo-2-kinase/fructose-26-bisphosphatase OS=Zea mays OX=4577 GN=103634503 PE=4 SV=1;tr|A	9.4303	13	3	9	NaN	NaN	NaN	NaN	NaN	NaN	NaN	NaN	NaN	NaN	NaN	NaN	22.1429	NaN	NaN	NaN				5	8.6	4.2	80.787	77697000	7
tr|A0A1D6K0A7|A0A1D6K0A7_MAIZE Nicotianamine synthase9 OS=Zea mays OX=4577 GN=103634563 PE=4 SV=1	323.31	68.1	10	31	23.7635	NaN	NaN	NaN	NaN	NaN	NaN	NaN	NaN	NaN	NaN	NaN	NaN	NaN	NaN	23.3048				31	68.1	19.5	65.939	1998100000	56
tr|B4FP08|B4FP08_MAIZE L-Aspartase-like family protein OS=Zea mays OX=4577 GN=100217081 PE=2 SV=1;tr|A0A1D6PBU5|A0A1D6PBU5_MAIZE L-Aspartase-like family protein OS=Zea mays OX=4577 GN=ZEAMMB73_Zm00001d047603 PE=4 SV=1;tr|A0A1D6K0U7|A0A1D6K0U7_MAIZE L-Aspar	4.028	12.4	2	2	23.0162	NaN	NaN	NaN	NaN	NaN	NaN	NaN	NaN	NaN	NaN	NaN	NaN	NaN	NaN	NaN	AMP biosynthetic process;AMP metabolic process;biosynthetic process;cellular biosynthetic process;cellular metabolic process;cellular nitrogen compound biosynthetic process;cellular nitrogen compound metabolic process;cellular process;'de novo' AMP biosynthetic process;'de novo' IMP biosynthetic process;heterocycle biosynthetic process;heterocycle metabolic process;IMP biosynthetic process;IMP me…	(S)-2-(5-amino-1-(5-phospho-D-ribosyl)imidazole-4-carboxamido)succinate AMP-lyase (fumarate-forming) activity;amidine-lyase activity;carbon-nitrogen lyase activity;catalytic activity;lyase activity;N6-(1,2-dicarboxyethyl)AMP AMP-lyase (fumarate-forming) activity		2	12.4	12.4	21.746	194830000	11
tr|B4FGF5|B4FGF5_MAIZE Hydroxyacylglutathione hydrolase cytoplasmic OS=Zea mays OX=4577 GN=100193826 PE=2 SV=1;tr|A0A1D6K1V4|A0A1D6K1V4_MAIZE Hydroxyacylglutathione hydrolase cytoplasmic OS=Zea mays OX=4577 GN=100193826 PE=3 SV=1;tr|A0A1D6K1V6|A0A1D6K1V6_M	2.8078	15.9	3	3	NaN	NaN	NaN	NaN	NaN	NaN	NaN	NaN	NaN	NaN	NaN	23.7961	NaN	NaN	NaN	NaN	alcohol metabolic process;aldehyde catabolic process;amine biosynthetic process;amine metabolic process;biosynthetic process;carbohydrate metabolic process;carboxylic acid biosynthetic process;carboxylic acid metabolic process;catabolic process;cellular aldehyde metabolic process;cellular amine metabolic process;cellular amino acid biosynthetic process;cellular amino acid metabolic process;cellul…	binding;catalytic activity;cation binding;hydrolase activity;hydrolase activity, acting on ester bonds;hydroxyacylglutathione hydrolase activity;ion binding;metal ion binding;thiolester hydrolase activity;transition metal ion binding;zinc ion binding	cell part;cytoplasmic part;cytosol;intracellular part	3	15.9	15.9	28.756	87956000	5
tr|A0A1D6K2U2|A0A1D6K2U2_MAIZE Heavy metal transport/detoxification superfamily protein OS=Zea mays OX=4577 GN=103634750 PE=4 SV=1	54.514	6.7	2	2	24.674	NaN	23.5873	NaN	NaN	NaN	NaN	NaN	NaN	NaN	NaN	NaN	NaN	NaN	23.337	NaN				2	6.7	6.7	49.922	121680000	13
tr|C0PEC4|C0PEC4_MAIZE 30S ribosomal protein S5 chloroplastic OS=Zea mays OX=4577 GN=103643355 PE=2 SV=1	61.272	45	18	18	30.307	28.3249	29.1454	29.2734	27.9736	28.1083	28.8534	28.5356	24.4013	27.2044	28.3122	30.8287	30.2578	28.5585	29.7059	29.2867	biosynthetic process;cellular biosynthetic process;cellular macromolecule biosynthetic process;cellular macromolecule metabolic process;cellular metabolic process;cellular process;cellular protein metabolic process;defense response;defense response to bacterium;establishment of localization;establishment of localization in cell;establishment of protein localization;establishment of protein locali…	binding;nucleic acid binding;RNA binding;structural constituent of ribosome;structural molecule activity	cell part;chloroplast part;chloroplast stroma;chloroplast thylakoid membrane;cytoplasmic part;intracellular membrane-bounded organelle;intracellular organelle;intracellular organelle part;intracellular part;macromolecular complex;membrane;membrane-bounded organelle;nucleus;organelle;organelle part;photosynthetic membrane;plastid part;plastid stroma;plastid thylakoid membrane;ribonucleoprotein com…	18	45	45	34.409	9677400000	172
tr|A0A1D6K3Q2|A0A1D6K3Q2_MAIZE Protein HUA2-LIKE 3 OS=Zea mays OX=4577 GN=ZEAMMB73_Zm00001d029223 PE=4 SV=1;tr|A0A1D6K3P4|A0A1D6K3P4_MAIZE Protein HUA2-LIKE 3 OS=Zea mays OX=4577 GN=ZEAMMB73_Zm00001d029223 PE=4 SV=1;tr|A0A1D6K3P8|A0A1D6K3P8_MAIZE Protein H	1.6516	3.1	2	2	NaN	NaN	NaN	NaN	NaN	NaN	NaN	NaN	NaN	NaN	NaN	NaN	NaN	26.5172	NaN	NaN				2	3.1	3.1	155.54	351030000	3
tr|A0A1D6K5G8|A0A1D6K5G8_MAIZE NAD(P)-binding Rossmann-fold superfamily protein OS=Zea mays OX=4577 GN=ZEAMMB73_Zm00001d029482 PE=4 SV=1;tr|A0A1D6K5G9|A0A1D6K5G9_MAIZE NAD(P)-binding Rossmann-fold superfamily protein OS=Zea mays OX=4577 GN=ZEAMMB73_Zm00001	1.9979	11.7	3	3	NaN	NaN	NaN	23.7328	NaN	NaN	NaN	NaN	NaN	24.1733	NaN	23.9858	NaN	NaN	NaN	NaN				3	11.7	11.7	21.686	135530000	3
tr|B4FSS3|B4FSS3_MAIZE SPFH/Band 7/PHB domain-containing membrane-associated protein family OS=Zea mays OX=4577 GN=100273090 PE=2 SV=1;tr|A0A1D6K5S9|A0A1D6K5S9_MAIZE SPFH/Band 7/PHB domain-containing membrane-associated protein family OS=Zea mays OX=4577 G	21.519	16.7	5	5	NaN	NaN	NaN	NaN	NaN	NaN	NaN	NaN	NaN	NaN	NaN	23.0884	NaN	NaN	NaN	NaN				5	16.7	16.7	42.477	170740000	15
tr|A0A1D6K6B3|A0A1D6K6B3_MAIZE UDP-glycosyltransferase 74B1 OS=Zea mays OX=4577 GN=ZEAMMB73_Zm00001d029620 PE=3 SV=1	1.4043	13	2	2	NaN	NaN	23.0209	22.6681	NaN	NaN	NaN	NaN	NaN	NaN	NaN	NaN	NaN	NaN	NaN	NaN				2	13	13	21.328	31183000	3
tr|A0A1D6K6B9|A0A1D6K6B9_MAIZE Xanthine dehydrogenase 1 OS=Zea mays OX=4577 GN=100384368 PE=4 SV=1;tr|A0A1D6K6B8|A0A1D6K6B8_MAIZE Xanthine dehydrogenase 1 OS=Zea mays OX=4577 GN=100384368 PE=4 SV=1;tr|A0A1D6K6C3|A0A1D6K6C3_MAIZE Xanthine dehydrogenase 1 OS	43.728	9.9	9	9	NaN	NaN	NaN	NaN	NaN	NaN	NaN	24.3144	NaN	NaN	NaN	NaN	NaN	NaN	NaN	NaN				9	9.9	9.9	150.19	369920000	12
tr|A0A1D6K7S2|A0A1D6K7S2_MAIZE Ubiquitin domain-containing protein DSK2b OS=Zea mays OX=4577 GN=100382017 PE=4 SV=1;tr|A0A1D6K7S4|A0A1D6K7S4_MAIZE Ubiquitin domain-containing protein DSK2b OS=Zea mays OX=4577 GN=100382017 PE=4 SV=1;tr|A0A1D6K7R4|A0A1D6K7R4	118.14	42.1	3	13	24.7298	24.1608	24.3026	NaN	NaN	25.2148	NaN	NaN	NaN	NaN	NaN	NaN	NaN	NaN	NaN	NaN				13	42.1	16.4	50.996	510130000	21
tr|A0A1D6K819|A0A1D6K819_MAIZE Protein NEN2 OS=Zea mays OX=4577 GN=100272294 PE=4 SV=1;tr|C0PFH2|C0PFH2_MAIZE Protein NEN2 OS=Zea mays OX=4577 GN=100272294 PE=2 SV=1;tr|A0A1D6K822|A0A1D6K822_MAIZE Protein NEN2 OS=Zea mays OX=4577 GN=100272294 PE=4 SV=1;tr|	34.855	16.5	5	5	NaN	NaN	NaN	NaN	NaN	NaN	NaN	NaN	NaN	24.3412	24.2116	NaN	NaN	NaN	NaN	NaN		binding;catalytic activity;exonuclease activity;hydrolase activity;hydrolase activity, acting on ester bonds;nuclease activity;nucleic acid binding		5	16.5	16.5	48.862	160920000	16
tr|A0A1D6K8Q0|A0A1D6K8Q0_MAIZE Nucleic acid binding protein OS=Zea mays OX=4577 GN=100283534 PE=4 SV=1;tr|A0A1D6K8P9|A0A1D6K8P9_MAIZE Nucleic acid binding protein OS=Zea mays OX=4577 GN=100283534 PE=4 SV=1	286.57	48.7	4	19	24.621	24.2203	NaN	NaN	NaN	NaN	NaN	NaN	NaN	NaN	NaN	NaN	NaN	NaN	NaN	NaN				4	16.2	16.2	46.651	442460000	35
tr|A0A1D6K8X4|A0A1D6K8X4_MAIZE Haloacid dehalogenase-like hydrolase domain-containing protein Sgpp OS=Zea mays OX=4577 GN=ZEAMMB73_Zm00001d030009 PE=4 SV=1;tr|A0A1D6K8X3|A0A1D6K8X3_MAIZE Haloacid dehalogenase-like hydrolase domain-containing protein Sgpp O	23.55	28.8	3	3	NaN	NaN	NaN	NaN	NaN	NaN	NaN	NaN	NaN	NaN	NaN	24.496	NaN	NaN	NaN	NaN				3	28.8	28.8	26.058	147970000	13
sp|P08735|G3PC1_MAIZE Glyceraldehyde-3-phosphate dehydrogenase 1, cytosolic OS=Zea mays OX=4577 GN=GAPC1 PE=2 SV=2	240.62	95.8	3	51	NaN	NaN	NaN	NaN	NaN	NaN	NaN	NaN	26.9593	NaN	28.8254	29.192	NaN	NaN	30.0907	NaN	alcohol catabolic process;alcohol metabolic process;carbohydrate catabolic process;carbohydrate metabolic process;catabolic process;cellular carbohydrate catabolic process;cellular carbohydrate metabolic process;cellular metabolic process;cellular process;generation of precursor metabolites and energy;glucose catabolic process;glucose metabolic process;glycolysis;hexose catabolic process;hexose m…	binding;catalytic activity;coenzyme binding;cofactor binding;glyceraldehyde-3-phosphate dehydrogenase (NAD+) (phosphorylating) activity;NAD binding;NADP binding;nucleotide binding;oxidoreductase activity;oxidoreductase activity, acting on the aldehyde or oxo group of donors;oxidoreductase activity, acting on the aldehyde or oxo group of donors, NAD or NADP as acceptor	cell part;cytoplasm;intracellular part	22	60.8	9.2	36.522	2998000000	33
tr|A0A1D6KBR6|A0A1D6KBR6_MAIZE Alpha-mannosidase OS=Zea mays OX=4577 GN=103638195 PE=3 SV=1;tr|A0A1D6KBS2|A0A1D6KBS2_MAIZE Alpha-mannosidase OS=Zea mays OX=4577 GN=103638195 PE=3 SV=1;tr|A0A1D6KBR7|A0A1D6KBR7_MAIZE Alpha-mannosidase OS=Zea mays OX=4577 GN=	41.355	14.9	6	7	NaN	NaN	NaN	NaN	NaN	NaN	NaN	23.5931	NaN	NaN	NaN	NaN	NaN	NaN	NaN	NaN				7	14.9	13.4	109.55	331650000	26
tr|B6TRT5|B6TRT5_MAIZE Alpha/beta-Hydrolases superfamily protein OS=Zea mays OX=4577 GN=100284261 PE=2 SV=1;tr|A0A1D6KCC9|A0A1D6KCC9_MAIZE Alpha/beta-Hydrolases superfamily protein OS=Zea mays OX=4577 GN=100284261 PE=4 SV=1;tr|A0A1D6KCD0|A0A1D6KCD0_MAIZE A	3.0098	7.1	2	2	NaN	22.891	NaN	NaN	NaN	NaN	NaN	NaN	NaN	NaN	NaN	NaN	NaN	NaN	NaN	NaN				2	7.1	7.1	39.23	118530000	6
tr|A0A1D6KE00|A0A1D6KE00_MAIZE Thaumatin-like protein OS=Zea mays OX=4577 GN=100383778 PE=4 SV=1	301.5	12.8	8	13	NaN	NaN	24.8687	NaN	NaN	NaN	NaN	NaN	25.6407	NaN	NaN	NaN	NaN	NaN	NaN	NaN				13	12.8	8	116.51	1701100000	57
tr|A0A1D6KEA9|A0A1D6KEA9_MAIZE RNA-binding (RRM/RBD/RNP motifs) family protein OS=Zea mays OX=4577 GN=100191891 PE=4 SV=1;tr|A0A1D6KEB3|A0A1D6KEB3_MAIZE RNA-binding (RRM/RBD/RNP motifs) family protein OS=Zea mays OX=4577 GN=100191891 PE=4 SV=1;tr|A0A1D6KEB	126.13	35.6	3	15	NaN	NaN	NaN	23.9496	NaN	NaN	NaN	NaN	NaN	23.5971	NaN	NaN	23.9723	24.1495	NaN	NaN		binding;nucleic acid binding;nucleotide binding		15	35.6	7	67.852	317180000	27
tr|A0A1D6KHS1|A0A1D6KHS1_MAIZE S-adenosyl-L-methionine-dependent methyltransferase superfamily protein OS=Zea mays OX=4577 GN=103641349 PE=3 SV=1;tr|A0A1D6KHS3|A0A1D6KHS3_MAIZE S-adenosyl-L-methionine-dependent methyltransferase superfamily protein OS=Zea	1.5838	7.5	3	3	NaN	NaN	NaN	NaN	NaN	NaN	NaN	NaN	NaN	26.9357	NaN	NaN	NaN	NaN	NaN	NaN				3	7.5	7.5	87.854	549010000	4
sp|O64411|PAO1_MAIZE Polyamine oxidase 1 OS=Zea mays OX=4577 GN=MPAO1 PE=1 SV=1;tr|K7TH00|K7TH00_MAIZE Polyamine oxidase1 OS=Zea mays OX=4577 GN=ZEAMMB73_Zm00001d024281 PE=4 SV=1	189.75	64	31	32	29.3826	29.1922	26.5571	28.7456	27.6144	27.2873	27.1147	26.4644	27.1067	28.4481	28.3219	27.104	29.6299	29.7054	28.6816	29.9229		catalytic activity;oxidoreductase activity		32	64	64	56.343	7337300000	258
tr|A0A1D6KJ54|A0A1D6KJ54_MAIZE Putative L-ascorbate peroxidase 6 OS=Zea mays OX=4577 GN=ZEAMMB73_Zm00001d031494 PE=3 SV=1	1.8068	15.2	2	3	NaN	NaN	NaN	NaN	NaN	NaN	NaN	NaN	NaN	NaN	25.2343	NaN	NaN	NaN	NaN	NaN				2	11.7	11.7	30.978	247430000	2
tr|A0A1D6KJI4|A0A1D6KJI4_MAIZE Pyridoxamine 5-phosphate oxidase family protein OS=Zea mays OX=4577 GN=100193760 PE=4 SV=1;tr|A0A1D6KJI5|A0A1D6KJI5_MAIZE Pyridoxamine 5-phosphate oxidase family protein OS=Zea mays OX=4577 GN=100193760 PE=4 SV=1	28.695	32	6	8	24.1988	24.0115	23.6939	NaN	NaN	NaN	NaN	NaN	23.6403	NaN	23.9046	23.8205	23.7044	23.2539	NaN	23.861				8	32	24.9	39.155	407750000	35
tr|B4FAF6|B4FAF6_MAIZE Uridine kinase OS=Zea mays OX=4577 GN=100191860 PE=2 SV=1;tr|A0A1D6KJU2|A0A1D6KJU2_MAIZE Uridine kinase OS=Zea mays OX=4577 GN=100191860 PE=3 SV=1;tr|A0A1D6KJU1|A0A1D6KJU1_MAIZE Uridine kinase OS=Zea mays OX=4577 GN=100191860 PE=3 SV	6.8632	23.8	5	7	NaN	NaN	23.389	NaN	24.4549	NaN	NaN	NaN	NaN	NaN	NaN	NaN	NaN	NaN	NaN	NaN	biosynthetic process;cellular biosynthetic process;cellular metabolic compound salvage;cellular metabolic process;cellular nitrogen compound biosynthetic process;cellular nitrogen compound metabolic process;cellular process;CTP biosynthetic process;CTP metabolic process;CTP salvage;heterocycle biosynthetic process;heterocycle metabolic process;metabolic process;nitrogen compound metabolic process…	adenyl nucleotide binding;adenyl ribonucleotide binding;ATP binding;binding;catalytic activity;kinase activity;nucleobase-containing compound kinase activity;nucleoside kinase activity;nucleotide binding;purine nucleotide binding;purine ribonucleoside triphosphate binding;purine ribonucleotide binding;ribonucleotide binding;transferase activity;transferase activity, transferring phosphorus-contai…		5	20	20	53.297	325720000	14
tr|A0A1D6KKJ5|A0A1D6KKJ5_MAIZE Chitin elicitor receptor kinase 1 OS=Zea mays OX=4577 GN=ZEAMMB73_Zm00001d031676 PE=3 SV=1;tr|A0A1D6KKJ3|A0A1D6KKJ3_MAIZE Chitin elicitor receptor kinase 1 OS=Zea mays OX=4577 GN=ZEAMMB73_Zm00001d031676 PE=4 SV=1;tr|A0A1D6KKJ	5.7397	13.4	3	3	NaN	NaN	NaN	22.6853	NaN	NaN	NaN	NaN	NaN	NaN	NaN	NaN	NaN	NaN	NaN	NaN				3	13.4	13.4	40.397	309110000	18
tr|A0A1D6KL36|A0A1D6KL36_MAIZE BAG family molecular chaperone regulator 1 OS=Zea mays OX=4577 GN=ZEAMMB73_Zm00001d031732 PE=4 SV=1	1.6916	8.8	3	3	NaN	NaN	NaN	NaN	NaN	NaN	NaN	NaN	NaN	NaN	NaN	NaN	NaN	NaN	NaN	23.0399				3	8.8	8.8	34.813	57745000	3
tr|A0A1D6KLC7|A0A1D6KLC7_MAIZE Metal-independent phosphoserine phosphatase OS=Zea mays OX=4577 GN=ZEAMMB73_Zm00001d031809 PE=4 SV=1;tr|A0A1D6KLC6|A0A1D6KLC6_MAIZE Metal-independent phosphoserine phosphatase OS=Zea mays OX=4577 GN=ZEAMMB73_Zm00001d031809 PE	1.9236	10.8	3	3	NaN	NaN	NaN	NaN	NaN	NaN	NaN	NaN	NaN	NaN	NaN	25.0739	NaN	NaN	NaN	NaN				3	10.8	10.8	32.381	67319000	4
tr|A0A1D6KLY9|A0A1D6KLY9_MAIZE Brachytic2 OS=Zea mays OX=4577 GN=100384057 PE=4 SV=1;tr|A0A1D6KLY8|A0A1D6KLY8_MAIZE Brachytic2 OS=Zea mays OX=4577 GN=100384057 PE=4 SV=1	1.939	1.3	2	2	24.9965	24.3786	NaN	NaN	NaN	NaN	NaN	NaN	NaN	NaN	NaN	NaN	NaN	NaN	24.0618	24.0067				2	1.3	1.3	148.1	721370000	12
tr|A0A1D6KM07|A0A1D6KM07_MAIZE Peptidase M1 family protein OS=Zea mays OX=4577 GN=ZEAMMB73_Zm00001d031891 PE=4 SV=1;tr|A0A1D6KM21|A0A1D6KM21_MAIZE Peptidase M1 family protein OS=Zea mays OX=4577 GN=ZEAMMB73_Zm00001d031891 PE=4 SV=1;tr|A0A1D6KM22|A0A1D6KM22	323.31	57.2	1	39	NaN	NaN	NaN	NaN	NaN	NaN	NaN	NaN	NaN	NaN	NaN	NaN	NaN	NaN	NaN	22.128				39	57.2	1.4	94.508	53053000	8
tr|B4FWX5|B4FWX5_MAIZE Dihydroxy-acid dehydratase chloroplastic OS=Zea mays OX=4577 GN=100273676 PE=2 SV=1;tr|A0A1D6KMC9|A0A1D6KMC9_MAIZE Dihydroxy-acid dehydratase chloroplastic OS=Zea mays OX=4577 GN=100273676 PE=4 SV=1;tr|A0A1D6KMC8|A0A1D6KMC8_MAIZE Dih	323.31	37.7	2	20	NaN	NaN	NaN	NaN	NaN	NaN	NaN	NaN	NaN	NaN	22.8642	NaN	23.1261	NaN	NaN	NaN	amine biosynthetic process;amine metabolic process;biosynthetic process;branched chain family amino acid biosynthetic process;branched chain family amino acid metabolic process;carboxylic acid biosynthetic process;carboxylic acid metabolic process;cellular amine metabolic process;cellular amino acid biosynthetic process;cellular amino acid metabolic process;cellular biosynthetic process;cellular …	carbon-oxygen lyase activity;catalytic activity;dihydroxy-acid dehydratase activity;hydro-lyase activity;lyase activity		20	37.7	5.9	63.267	141440000	3
tr|A0A1D6KML1|A0A1D6KML1_MAIZE Thioredoxin family protein OS=Zea mays OX=4577 GN=ZEAMMB73_Zm00001d031948 PE=4 SV=1;tr|A0A1D6KMK8|A0A1D6KMK8_MAIZE Thioredoxin family protein OS=Zea mays OX=4577 GN=ZEAMMB73_Zm00001d031948 PE=4 SV=1;tr|B7ZXK9|B7ZXK9_MAIZE Thi	6.0399	24.7	2	4	NaN	NaN	NaN	NaN	NaN	NaN	NaN	NaN	NaN	NaN	NaN	NaN	NaN	NaN	24.2578	NaN	biological regulation;cell redox homeostasis;cellular homeostasis;cellular process;homeostatic process;regulation of biological process;regulation of biological quality;regulation of cellular process	catalytic activity;disulfide oxidoreductase activity;electron carrier activity;oxidoreductase activity;oxidoreductase activity, acting on a sulfur group of donors;protein disulfide oxidoreductase activity;transferase activity		2	15.6	15.6	35.137	17691000	2
tr|A0A1D6KMS9|A0A1D6KMS9_MAIZE Vignain OS=Zea mays OX=4577 GN=ZEAMMB73_Zm00001d031971 PE=3 SV=1;tr|A0A1D6KMS8|A0A1D6KMS8_MAIZE Vignain OS=Zea mays OX=4577 GN=ZEAMMB73_Zm00001d031971 PE=3 SV=1	35.701	29.5	7	7	NaN	NaN	NaN	NaN	NaN	NaN	NaN	NaN	NaN	NaN	NaN	NaN	NaN	NaN	NaN	22.2376				7	29.5	29.5	37.496	550350000	46
tr|A0A1D6KNM8|A0A1D6KNM8_MAIZE D-3-phosphoglycerate dehydrogenase 2 chloroplastic OS=Zea mays OX=4577 GN=ZEAMMB73_Zm00001d032114 PE=4 SV=1	323.31	51	3	28	NaN	NaN	NaN	NaN	NaN	NaN	NaN	NaN	NaN	NaN	24.1614	24.2484	NaN	NaN	NaN	NaN				26	47.6	7.6	69.424	442490000	39
tr|A0A1D6KNS0|A0A1D6KNS0_MAIZE Cinnamoyl CoA reductase1 OS=Zea mays OX=4577 GN=ZEAMMB73_Zm00001d032152 PE=4 SV=1	4.9428	11.5	4	4	NaN	24.998	24.4919	23.628	NaN	23.7314	NaN	NaN	23.9655	23.4928	NaN	24.3231	NaN	NaN	NaN	NaN				4	11.5	11.5	44.359	148240000	7
tr|A0A1D6KPA9|A0A1D6KPA9_MAIZE Glycosyltransferase OS=Zea mays OX=4577 GN=ZEAMMB73_Zm00001d032222 PE=3 SV=1	1.6518	9.9	3	3	NaN	NaN	NaN	NaN	NaN	NaN	NaN	NaN	NaN	NaN	NaN	NaN	NaN	NaN	NaN	23.5826				3	9.9	9.9	55.03	31590000	4
tr|A0A1D6KPH6|A0A1D6KPH6_MAIZE Aminoaldehyde dehydrogenase 1b OS=Zea mays OX=4577 GN=ZEAMMB73_Zm00001d032257 PE=3 SV=1;tr|A0A1D6KPH7|A0A1D6KPH7_MAIZE Aminoaldehyde dehydrogenase 1b OS=Zea mays OX=4577 GN=ZEAMMB73_Zm00001d032257 PE=3 SV=1;tr|A0A1D6KPH8|A0A1	16.697	33.6	3	11	NaN	NaN	NaN	NaN	NaN	NaN	22.8865	NaN	23.5328	NaN	NaN	NaN	NaN	NaN	NaN	NaN				3	10.3	10.3	55.08	347810000	18
tr|A0A1D6KPW9|A0A1D6KPW9_MAIZE Splicing factor PWI domain-containing protein / RNA recognition motif (RRM)-containing protein OS=Zea mays OX=4577 GN=103643327 PE=4 SV=1;tr|A0A1D6KPZ5|A0A1D6KPZ5_MAIZE Splicing factor PWI domain-containing protein / RNA reco	2.1116	9.6	2	6	NaN	NaN	NaN	NaN	NaN	NaN	NaN	NaN	NaN	NaN	NaN	NaN	NaN	NaN	NaN	20.6335				2	4.6	4.6	76.659	14928000	2
tr|A0A1D6KQI1|A0A1D6KQI1_MAIZE FAD binding domain containing protein OS=Zea mays OX=4577 GN=ZEAMMB73_Zm00001d032407 PE=4 SV=1	14.395	20	7	8	NaN	NaN	NaN	NaN	NaN	NaN	NaN	23.3127	NaN	NaN	NaN	NaN	NaN	NaN	NaN	NaN				8	20	18.6	65.041	355180000	11
tr|A0A1D6KQJ1|A0A1D6KQJ1_MAIZE Dirigent protein OS=Zea mays OX=4577 GN=ZEAMMB73_Zm00001d032419 PE=3 SV=1	10.666	22.8	2	2	25.7206	NaN	NaN	NaN	NaN	NaN	NaN	NaN	NaN	NaN	NaN	NaN	NaN	NaN	NaN	NaN				2	22.8	22.8	20.602	165510000	7
tr|A0A1D6KQK5|A0A1D6KQK5_MAIZE Putative E3 ubiquitin-protein ligase RING1a OS=Zea mays OX=4577 GN=ZEAMMB73_Zm00001d032427 PE=4 SV=1;tr|A0A1D6KQK3|A0A1D6KQK3_MAIZE Putative E3 ubiquitin-protein ligase RING1a OS=Zea mays OX=4577 GN=ZEAMMB73_Zm00001d032427 PE	1.466	11.5	2	2	NaN	NaN	NaN	NaN	NaN	NaN	NaN	NaN	NaN	NaN	NaN	NaN	22.0274	NaN	NaN	NaN				2	11.5	11.5	40.635	13300000	3
tr|A0A1D6KQP7|A0A1D6KQP7_MAIZE Tetratricopeptide repeat (TPR)-like superfamily protein OS=Zea mays OX=4577 GN=ZEAMMB73_Zm00001d032441 PE=4 SV=1	13.665	21.8	3	5	NaN	NaN	NaN	NaN	NaN	NaN	NaN	NaN	NaN	NaN	22.778	NaN	NaN	NaN	NaN	NaN				5	21.8	13.8	54.532	221720000	18
tr|A0A1D6KRC1|A0A1D6KRC1_MAIZE DEAD-box ATP-dependent RNA helicase 8 OS=Zea mays OX=4577 GN=100283799 PE=3 SV=1;tr|B6TLY3|B6TLY3_MAIZE ATP-dependent RNA helicase dhh1 OS=Zea mays OX=4577 GN=100283799 PE=2 SV=1;tr|A0A1D6KRB5|A0A1D6KRB5_MAIZE DEAD-box ATP-de	14.593	24.9	7	7	24.9342	NaN	25.5676	NaN	NaN	25.2194	NaN	NaN	25.3018	NaN	NaN	25.2222	NaN	NaN	NaN	NaN		adenyl nucleotide binding;adenyl ribonucleotide binding;ATP binding;binding;catalytic activity;helicase activity;hydrolase activity;hydrolase activity, acting on acid anhydrides;hydrolase activity, acting on acid anhydrides, in phosphorus-containing anhydrides;nucleic acid binding;nucleoside-triphosphatase activity;nucleotide binding;purine nucleotide binding;purine ribonucleoside triphosphate bi…		7	24.9	24.9	51.474	1054800000	53
tr|A0A1D6KS88|A0A1D6KS88_MAIZE Alpha-galactosidase OS=Zea mays OX=4577 GN=ZEAMMB73_Zm00001d032605 PE=3 SV=1	163.78	54.5	6	16	22.8513	23.3374	23.5866	NaN	NaN	NaN	NaN	NaN	NaN	23.7423	NaN	NaN	23.7099	23.8765	NaN	NaN				16	54.5	22.2	38.604	714400000	39
tr|A0A1D6KS92|A0A1D6KS92_MAIZE Alpha-galactosidase OS=Zea mays OX=4577 GN=ZEAMMB73_Zm00001d032608 PE=3 SV=1	24.562	18.4	5	5	NaN	NaN	NaN	NaN	NaN	NaN	NaN	24.2942	NaN	NaN	NaN	NaN	NaN	NaN	NaN	NaN				5	18.4	18.4	38.859	286280000	21
tr|A0A1D6KU82|A0A1D6KU82_MAIZE Glutamate-ammonia ligase OS=Zea mays OX=4577 GN=ZEAMMB73_Zm00001d032815 PE=3 SV=1;tr|A0A1D6KU81|A0A1D6KU81_MAIZE Glutamate-ammonia ligase OS=Zea mays OX=4577 GN=ZEAMMB73_Zm00001d032815 PE=3 SV=1;tr|A0A1D6KU84|A0A1D6KU84_MAIZE	4.739	9.5	3	3	NaN	NaN	22.5473	NaN	NaN	NaN	NaN	NaN	NaN	NaN	NaN	NaN	NaN	NaN	NaN	NaN				3	9.5	9.5	59.38	104620000	8
tr|C0P656|C0P656_MAIZE 50S ribosomal protein L28 chloroplastic OS=Zea mays OX=4577 GN=100283221 PE=2 SV=1;tr|A0A1D6KUQ7|A0A1D6KUQ7_MAIZE 50S ribosomal protein L28 OS=Zea mays OX=4577 GN=ZEAMMB73_Zm00001d032896 PE=3 SV=1;tr|A0A1D6LYR8|A0A1D6LYR8_MAIZE 50S r	4.2062	14.9	2	2	NaN	21.9003	NaN	NaN	NaN	NaN	NaN	NaN	24.4968	NaN	NaN	21.2782	NaN	NaN	NaN	NaN	biosynthetic process;cellular biosynthetic process;cellular macromolecule biosynthetic process;cellular macromolecule metabolic process;cellular metabolic process;cellular process;cellular protein metabolic process;macromolecule biosynthetic process;macromolecule metabolic process;metabolic process;primary metabolic process;protein metabolic process;translation	structural constituent of ribosome;structural molecule activity	cell part;cytoplasmic part;intracellular non-membrane-bounded organelle;intracellular organelle;intracellular part;macromolecular complex;non-membrane-bounded organelle;organelle;ribonucleoprotein complex;ribosome	2	14.9	14.9	15.227	35420000	2
tr|A0A1D6KUY8|A0A1D6KUY8_MAIZE Protein NETWORKED 1A OS=Zea mays OX=4577 GN=ZEAMMB73_Zm00001d032933 PE=4 SV=1;tr|A0A1D6KUY5|A0A1D6KUY5_MAIZE Protein NETWORKED 1A OS=Zea mays OX=4577 GN=ZEAMMB73_Zm00001d032933 PE=4 SV=1;tr|A0A1D6KUY7|A0A1D6KUY7_MAIZE Protein	1.7975	1.2	2	2	NaN	NaN	NaN	NaN	28.6824	28.7328	NaN	NaN	NaN	NaN	NaN	NaN	NaN	NaN	NaN	NaN				2	1.2	1.2	292.54	2325400000	8
tr|A0A1D6KV12|A0A1D6KV12_MAIZE Chitinase 1 OS=Zea mays OX=4577 GN=ZEAMMB73_Zm00001d032947 PE=3 SV=1	7.1122	10.8	2	2	NaN	22.5247	NaN	NaN	NaN	NaN	NaN	NaN	NaN	NaN	NaN	NaN	NaN	NaN	NaN	NaN				2	10.8	10.8	31.278	192000000	18
tr|A0A1D6H1H5|A0A1D6H1H5_MAIZE Porphobilinogen deaminase chloroplastic OS=Zea mays OX=4577 GN=ZEAMMB73_Zm00001d015366 PE=3 SV=1;tr|A0A1D6H1H6|A0A1D6H1H6_MAIZE Porphobilinogen deaminase chloroplastic OS=Zea mays OX=4577 GN=ZEAMMB73_Zm00001d015366 PE=3 SV=1	323.31	72	13	42	25.8178	28.5849	26.1459	28.3753	29.4564	28.5536	28.304	27.7227	29.4134	30.1385	29.4467	29.8249	30.3036	29.1186	26.9364	27.294				42	72	39.7	45.616	6890100000	188
tr|A0A1D6KWM5|A0A1D6KWM5_MAIZE DUF21 domain-containing protein chloroplastic OS=Zea mays OX=4577 GN=ZEAMMB73_Zm00001d033155 PE=4 SV=1;tr|A0A1D6KWM4|A0A1D6KWM4_MAIZE DUF21 domain-containing protein chloroplastic OS=Zea mays OX=4577 GN=ZEAMMB73_Zm00001d03315	6.6762	9.9	3	3	NaN	NaN	NaN	NaN	NaN	NaN	NaN	23.8871	NaN	NaN	NaN	NaN	NaN	NaN	NaN	NaN				3	9.9	9.9	59.302	35006000	3
tr|A0A1D6KX75|A0A1D6KX75_MAIZE Nucleosome/chromatin assembly factor C OS=Zea mays OX=4577 GN=103643702 PE=4 SV=1;tr|Q8W514|Q8W514_MAIZE Histone-binding protein MSI1 OS=Zea mays OX=4577 GN=nfc103 PE=2 SV=1;tr|A0A1D6KX72|A0A1D6KX72_MAIZE Nucleosome/chromatin	14.023	21.6	5	5	NaN	NaN	NaN	NaN	22.2904	NaN	22.3605	22.5907	NaN	NaN	NaN	NaN	NaN	NaN	NaN	NaN			cell part;intracellular membrane-bounded organelle;intracellular organelle;intracellular part;membrane-bounded organelle;nucleus;organelle	5	21.6	21.6	42.866	133540000	20
tr|A0A1D6KYR9|A0A1D6KYR9_MAIZE Tetratricopeptide repeat (TPR)-like superfamily protein OS=Zea mays OX=4577 GN=103643760 PE=4 SV=1;tr|A0A1D6KYR8|A0A1D6KYR8_MAIZE Tetratricopeptide repeat (TPR)-like superfamily protein OS=Zea mays OX=4577 GN=103643760 PE=4 S	1.7182	5.1	3	3	NaN	NaN	NaN	NaN	NaN	NaN	NaN	NaN	NaN	NaN	NaN	NaN	NaN	NaN	NaN	24.5276				3	5.1	5.1	85.959	214420000	3
tr|A0A1D6KZM3|A0A1D6KZM3_MAIZE Uncharacterized protein OS=Zea mays OX=4577 GN=100382366 PE=4 SV=1;tr|C0P6Z0|C0P6Z0_MAIZE Uncharacterized protein OS=Zea mays OX=4577 GN=100382366 PE=2 SV=1;tr|A0A1D6KZM6|A0A1D6KZM6_MAIZE Uncharacterized protein OS=Zea mays O	61.718	24.5	1	7	NaN	NaN	NaN	NaN	NaN	NaN	23.2557	NaN	NaN	22.6713	23.351	22.9019	NaN	NaN	NaN	NaN				7	24.5	2.9	40.735	333500000	19
tr|A0A1D6L1Y6|A0A1D6L1Y6_MAIZE Putative inactive receptor kinase OS=Zea mays OX=4577 GN=ZEAMMB73_Zm00001d033745 PE=4 SV=1	2.3288	8.1	3	3	NaN	NaN	NaN	22.9095	NaN	NaN	NaN	NaN	NaN	NaN	NaN	NaN	NaN	NaN	NaN	NaN				3	8.1	8.1	71.951	155830000	5
tr|A0A1D6L202|A0A1D6L202_MAIZE Threonine dehydratase OS=Zea mays OX=4577 GN=103643901 PE=3 SV=1;tr|A0A1D6L204|A0A1D6L204_MAIZE Threonine dehydratase OS=Zea mays OX=4577 GN=103643901 PE=3 SV=1;tr|A0A1D6L203|A0A1D6L203_MAIZE Threonine dehydratase OS=Zea mays	15.391	13.7	5	5	NaN	NaN	23.6658	NaN	NaN	NaN	NaN	NaN	NaN	NaN	NaN	NaN	NaN	NaN	NaN	NaN				5	13.7	13.7	62.162	165400000	10
tr|A0A1D6L2B0|A0A1D6L2B0_MAIZE Dihydroxyacetone kinase OS=Zea mays OX=4577 GN=ZEAMMB73_Zm00001d033795 PE=4 SV=1;tr|C0PH33|C0PH33_MAIZE Dihydroxyacetone kinase OS=Zea mays OX=4577 GN=ZEAMMB73_Zm00001d033795 PE=2 SV=1;tr|A0A1D6L2A5|A0A1D6L2A5_MAIZE Dihydroxy	22.074	6.2	2	2	NaN	NaN	22.7241	NaN	NaN	NaN	NaN	NaN	NaN	NaN	NaN	NaN	NaN	NaN	NaN	NaN	alcohol metabolic process;alditol metabolic process;carbohydrate metabolic process;cellular carbohydrate metabolic process;cellular metabolic process;cellular process;glycerol metabolic process;metabolic process;polyol metabolic process;primary metabolic process;small molecule metabolic process	adenyl nucleotide binding;adenyl ribonucleotide binding;ATP binding;binding;catalytic activity;glycerone kinase activity;kinase activity;nucleotide binding;phosphotransferase activity, alcohol group as acceptor;purine nucleotide binding;purine ribonucleoside triphosphate binding;purine ribonucleotide binding;ribonucleotide binding;transferase activity;transferase activity, transferring phosphorus…		2	6.2	6.2	56.56	112200000	12
tr|A0A1D6L657|A0A1D6L657_MAIZE C-type cytochrome synthesis protein1 OS=Zea mays OX=4577 GN=ZEAMMB73_Zm00001d034196 PE=4 SV=1;tr|C0PHK9|C0PHK9_MAIZE C-type cytochrome synthesis protein1 OS=Zea mays OX=4577 GN=ZEAMMB73_Zm00001d034196 PE=2 SV=1;tr|A0A1D6L656|	4.2252	7.6	2	2	NaN	NaN	NaN	NaN	NaN	NaN	NaN	NaN	NaN	NaN	NaN	NaN	24.9147	NaN	NaN	NaN	alcohol metabolic process;anatomical structure morphogenesis;biological regulation;biosynthetic process;carbohydrate biosynthetic process;carbohydrate metabolic process;carboxylic acid metabolic process;carotenoid biosynthetic process;carotenoid metabolic process;cell differentiation;cellular aldehyde metabolic process;cellular biosynthetic process;cellular carbohydrate biosynthetic process;cellu…			2	7.6	7.6	55.301	74156000	4
tr|B6SMC7|B6SMC7_MAIZE 40S ribosomal protein S29 OS=Zea mays OX=4577 GN=100303896 PE=2 SV=1;tr|A0A1D6PQ36|A0A1D6PQ36_MAIZE 40S ribosomal protein S29 OS=Zea mays OX=4577 GN=ZEAMMB73_Zm00001d048787 PE=4 SV=1;tr|A0A1D6L690|A0A1D6L690_MAIZE 40S ribosomal prote	2.9143	37.5	2	2	NaN	NaN	NaN	NaN	NaN	NaN	NaN	NaN	24.3576	NaN	NaN	NaN	NaN	NaN	NaN	NaN	biosynthetic process;cellular biosynthetic process;cellular macromolecule biosynthetic process;cellular macromolecule metabolic process;cellular metabolic process;cellular process;cellular protein metabolic process;macromolecule biosynthetic process;macromolecule metabolic process;metabolic process;primary metabolic process;protein metabolic process;translation	structural constituent of ribosome;structural molecule activity	cell part;cytoplasmic part;intracellular non-membrane-bounded organelle;intracellular organelle;intracellular part;macromolecular complex;non-membrane-bounded organelle;organelle;ribonucleoprotein complex;ribosome	2	37.5	37.5	6.4284	16991000	2
tr|A0A1D6L6S7|A0A1D6L6S7_MAIZE Accelerated cell death 11 OS=Zea mays OX=4577 GN=ZEAMMB73_Zm00001d034346 PE=4 SV=1;tr|A0A1D6L6S6|A0A1D6L6S6_MAIZE Accelerated cell death 11 OS=Zea mays OX=4577 GN=ZEAMMB73_Zm00001d034346 PE=4 SV=1	1.5997	12.8	2	2	NaN	NaN	NaN	NaN	NaN	NaN	NaN	NaN	NaN	NaN	NaN	NaN	NaN	22.3662	NaN	NaN				2	12.8	12.8	28.413	132130000	1
sp|O23887|ALDO1_MAIZE Indole-3-acetaldehyde oxidase OS=Zea mays OX=4577 GN=AO1 PE=1 SV=1;tr|A0A1D6L727|A0A1D6L727_MAIZE Aldehyde oxidase1 OS=Zea mays OX=4577 GN=ZEAMMB73_Zm00001d034387 PE=4 SV=1;tr|A0A1D6L729|A0A1D6L729_MAIZE Aldehyde oxidase1 OS=Zea mays	26.584	11.8	8	12	NaN	NaN	NaN	NaN	NaN	NaN	NaN	NaN	NaN	23.0652	NaN	NaN	23.2127	NaN	NaN	NaN	abscisic acid biosynthetic process;abscisic acid metabolic process;apocarotenoid biosynthetic process;apocarotenoid metabolic process;auxin biosynthetic process;auxin metabolic process;biological regulation;biosynthetic process;carboxylic acid biosynthetic process;carboxylic acid metabolic process;cellular biosynthetic process;cellular ketone metabolic process;cellular lipid metabolic process;cel…	2 iron, 2 sulfur cluster binding;aldehyde oxidase activity;aryl-aldehyde oxidase activity;binding;catalytic activity;cation binding;coenzyme binding;cofactor binding;electron carrier activity;FAD binding;flavin adenine dinucleotide binding;indole-3-acetaldehyde oxidase activity;ion binding;iron ion binding;iron-sulfur cluster binding;metal cluster binding;metal ion binding;molybdopterin cofactor …	cell part;cytoplasm;intracellular part	8	7.4	7.4	146.68	352630000	40
tr|A0A1D6L7E9|A0A1D6L7E9_MAIZE Hydroxyproline-rich glycoprotein family protein OS=Zea mays OX=4577 GN=100216913 PE=4 SV=1	11.505	11.9	5	5	NaN	22.7611	NaN	NaN	NaN	23.5978	NaN	NaN	NaN	NaN	NaN	22.7178	NaN	NaN	NaN	NaN				5	11.9	11.9	49.142	194360000	28
tr|A0A1D6L856|A0A1D6L856_MAIZE Vesicle-associated membrane protein 722 OS=Zea mays OX=4577 GN=100282952 PE=3 SV=1;tr|B4FP96|B4FP96_MAIZE Vesicle-associated membrane protein 722 OS=Zea mays OX=4577 GN=100282952 PE=2 SV=1;tr|B4FQX6|B4FQX6_MAIZE Vesicle-assoc	23.199	31.7	2	5	NaN	NaN	22.4857	NaN	NaN	NaN	21.2223	NaN	NaN	NaN	NaN	NaN	NaN	NaN	NaN	NaN	cellular process;establishment of localization;transport;vesicle-mediated transport		cell part;integral to membrane;intrinsic to membrane;membrane part	5	31.7	8.9	20.176	121150000	22
tr|B6SP43|B6SP43_MAIZE ABC family1 OS=Zea mays OX=4577 GN=ZEAMMB73_Zm00001d007597 PE=2 SV=1	110.65	44.7	25	26	25.9644	24.4942	24.7114	26.2835	28.0508	27.3737	27.1244	27.6323	25.4607	26.3526	26.6214	25.342	27.5223	27.4776	26.7684	27.7277		adenyl nucleotide binding;adenyl ribonucleotide binding;ATP binding;ATPase activity;binding;catalytic activity;hydrolase activity;hydrolase activity, acting on acid anhydrides;hydrolase activity, acting on acid anhydrides, in phosphorus-containing anhydrides;nucleoside-triphosphatase activity;nucleotide binding;purine nucleotide binding;purine ribonucleoside triphosphate binding;purine ribonucleo…		26	44.7	43.3	79.099	1583600000	124
tr|A0A1D6L8U2|A0A1D6L8U2_MAIZE tRNA (guanine(26)-N(2))-dimethyltransferase OS=Zea mays OX=4577 GN=100275038 PE=3 SV=1;tr|A0A1D6L8U1|A0A1D6L8U1_MAIZE tRNA (guanine(26)-N(2))-dimethyltransferase OS=Zea mays OX=4577 GN=100275038 PE=3 SV=1;tr|A0A1D6L8T4|A0A1D6	5.842	11	4	4	NaN	NaN	NaN	NaN	NaN	NaN	NaN	22.1881	NaN	NaN	NaN	NaN	NaN	NaN	NaN	NaN				4	11	11	62.293	186290000	16
tr|C0HGF4|C0HGF4_MAIZE Galactokinase OS=Zea mays OX=4577 GN=100284953 PE=2 SV=1;tr|A0A1D6LAE7|A0A1D6LAE7_MAIZE Galactokinase OS=Zea mays OX=4577 GN=100284953 PE=4 SV=1;tr|A0A1D6LAE8|A0A1D6LAE8_MAIZE Galactokinase OS=Zea mays OX=4577 GN=100284953 PE=4 SV=1	15.51	17.9	8	8	NaN	NaN	22.9012	NaN	NaN	NaN	NaN	NaN	NaN	NaN	22.6163	NaN	NaN	22.5247	22.7129	NaN	alcohol metabolic process;carbohydrate metabolic process;cellular carbohydrate metabolic process;cellular metabolic process;cellular process;galactose metabolic process;hexose metabolic process;metabolic process;monosaccharide metabolic process;primary metabolic process;small molecule metabolic process	adenyl nucleotide binding;adenyl ribonucleotide binding;ATP binding;binding;carbohydrate kinase activity;catalytic activity;galactokinase activity;kinase activity;nucleotide binding;phosphotransferase activity, alcohol group as acceptor;purine nucleotide binding;purine ribonucleoside triphosphate binding;purine ribonucleotide binding;ribonucleotide binding;transferase activity;transferase activit…	cell part;cytoplasm;intracellular part	8	17.9	17.9	54.371	190620000	19
tr|A0A1D6LAN5|A0A1D6LAN5_MAIZE Galactose oxidase/kelch repeat superfamily protein OS=Zea mays OX=4577 GN=100384139 PE=4 SV=1;tr|C0PLU8|C0PLU8_MAIZE Galactose oxidase/kelch repeat superfamily protein OS=Zea mays OX=4577 GN=100384139 PE=2 SV=1	4.852	11.9	3	3	NaN	NaN	NaN	24.6585	NaN	NaN	NaN	NaN	NaN	24.3641	NaN	NaN	NaN	NaN	NaN	NaN				3	11.9	11.9	44.883	380360000	8
tr|B4F9P4|B4F9P4_MAIZE Nucleic acid-binding proteins superfamily OS=Zea mays OX=4577 GN=ZEAMMB73_Zm00001d034828 PE=2 SV=1;tr|A0A1D6LBR7|A0A1D6LBR7_MAIZE Nucleic acid-binding proteins superfamily OS=Zea mays OX=4577 GN=ZEAMMB73_Zm00001d034828 PE=4 SV=1	20.861	21	6	6	NaN	NaN	NaN	23.8642	NaN	NaN	NaN	NaN	NaN	NaN	NaN	NaN	NaN	NaN	NaN	NaN		binding;nucleic acid binding		6	21	21	40.201	172870000	18
tr|A0A1D6LD00|A0A1D6LD00_MAIZE Pleckstrin homology (PH) domain-containing protein OS=Zea mays OX=4577 GN=100284752 PE=4 SV=1;tr|C0P9F2|C0P9F2_MAIZE Pleckstrin homology (PH) domain-containing protein OS=Zea mays OX=4577 GN=100284752 PE=2 SV=1;tr|A0A1D6GKP7|	3.5916	12.2	3	3	NaN	NaN	NaN	22.8221	NaN	NaN	NaN	NaN	NaN	NaN	22.6541	NaN	NaN	NaN	NaN	NaN				3	12.2	12.2	42.586	136730000	14
tr|B6SUJ3|B6SUJ3_MAIZE Plastid-specific 30S ribosomal protein 2 OS=Zea mays OX=4577 GN=100281348 PE=2 SV=1	64.207	57.4	15	15	28.2742	25.6897	26.0946	24.8475	24.3445	26.4985	24.9855	26.1467	23.4043	24.5278	24.9804	26.5435	25.4527	25.5075	27.8277	26.8446	alcohol metabolic process;biosynthetic process;carbohydrate metabolic process;carboxylic acid metabolic process;cellular aldehyde metabolic process;cellular biosynthetic process;cellular carbohydrate metabolic process;cellular component organization;cellular component organization at cellular level;cellular component organization or biogenesis;cellular component organization or biogenesis at cell…	binding;nucleic acid binding;nucleotide binding	cell part;chloroplast part;chloroplast stroma;cytoplasmic part;intracellular non-membrane-bounded organelle;intracellular organelle;intracellular organelle part;intracellular part;macromolecular complex;non-membrane-bounded organelle;organelle;organelle part;plastid part;plastid stroma;ribonucleoprotein complex;ribosome;thylakoid	15	57.4	57.4	29.594	1283200000	52
tr|A0A1D6LE55|A0A1D6LE55_MAIZE Peroxidase OS=Zea mays OX=4577 GN=103628960 PE=3 SV=1	181.02	13.3	4	4	NaN	NaN	NaN	NaN	NaN	NaN	NaN	NaN	NaN	NaN	NaN	NaN	NaN	NaN	NaN	24.3979				4	13.3	13.3	34.848	452980000	19
tr|A0A1D6LFH5|A0A1D6LFH5_MAIZE GDP-L-galactose phosphorylase 1 OS=Zea mays OX=4577 GN=100283852 PE=4 SV=1;tr|A0A1D6LFH7|A0A1D6LFH7_MAIZE GDP-L-galactose phosphorylase 1 OS=Zea mays OX=4577 GN=100283852 PE=4 SV=1;tr|A0A1D6LFH6|A0A1D6LFH6_MAIZE GDP-L-galacto	3.895	9.1	3	3	NaN	NaN	NaN	NaN	NaN	NaN	NaN	NaN	22.344	NaN	22.3826	NaN	22.1406	NaN	NaN	22.5277				3	9.1	9.1	52.005	62053000	16
tr|C0PFS7|C0PFS7_MAIZE Zinc finger (C3HC4-type RING finger) family protein OS=Zea mays OX=4577 GN=ZEAMMB73_Zm00001d035428 PE=2 SV=1;tr|A0A1D6LGC6|A0A1D6LGC6_MAIZE Zinc finger (C3HC4-type RING finger) family protein OS=Zea mays OX=4577 GN=ZEAMMB73_Zm00001d0	112.87	21.1	6	8	NaN	NaN	NaN	22.9692	22.6097	NaN	NaN	23.2673	NaN	NaN	NaN	NaN	NaN	NaN	NaN	NaN				8	21.1	15.9	65.371	135050000	15
tr|A0A1D6LIP2|A0A1D6LIP2_MAIZE Putative RING finger U-box domain family protein OS=Zea mays OX=4577 GN=ZEAMMB73_Zm00001d035764 PE=4 SV=1;tr|A0A1D6LIP6|A0A1D6LIP6_MAIZE Putative RING finger U-box domain family protein OS=Zea mays OX=4577 GN=ZEAMMB73_Zm00001	1.9842	3.8	2	2	19.5227	NaN	NaN	NaN	NaN	NaN	NaN	NaN	NaN	NaN	NaN	NaN	NaN	NaN	NaN	NaN				2	3.8	3.8	81.062	2400700	3
tr|A0A1D6LJU9|A0A1D6LJU9_MAIZE Plant/F18O14-17 protein OS=Zea mays OX=4577 GN=103629390 PE=4 SV=1	7.8431	13.4	5	5	NaN	NaN	NaN	NaN	NaN	NaN	NaN	NaN	21.9214	NaN	22.0559	NaN	NaN	NaN	NaN	NaN				5	13.4	13.4	67.512	113030000	12
tr|A0A1D6LLT2|A0A1D6LLT2_MAIZE Prolyl oligopeptidase family protein OS=Zea mays OX=4577 GN=100281516 PE=4 SV=1;tr|A0A1D6LLU6|A0A1D6LLU6_MAIZE Prolyl oligopeptidase family protein OS=Zea mays OX=4577 GN=100281516 PE=4 SV=1;tr|A0A1D6LLU5|A0A1D6LLU5_MAIZE Pro	17.402	17	2	9	NaN	NaN	NaN	NaN	NaN	NaN	NaN	24.0459	NaN	23.1455	NaN	NaN	NaN	NaN	NaN	NaN				9	17	5.1	86.113	98522000	6
tr|A0A1D6LMW9|A0A1D6LMW9_MAIZE Endoplasmin-like protein OS=Zea mays OX=4577 GN=ZEAMMB73_Zm00001d036401 PE=3 SV=1;tr|A0A1D6LMX1|A0A1D6LMX1_MAIZE Endoplasmin-like protein OS=Zea mays OX=4577 GN=ZEAMMB73_Zm00001d036401 PE=3 SV=1;tr|A0A1D6LMX5|A0A1D6LMX5_MAIZE	323.31	53.4	11	38	NaN	NaN	NaN	NaN	NaN	NaN	NaN	NaN	NaN	NaN	NaN	25.5187	NaN	NaN	NaN	NaN				38	53.4	20.1	92.571	1387300000	74
tr|A0A1D6LQP5|A0A1D6LQP5_MAIZE Isoleucine--tRNA ligase cytoplasmic OS=Zea mays OX=4577 GN=100384866 PE=4 SV=1;tr|A0A1D6LQQ3|A0A1D6LQQ3_MAIZE Isoleucine--tRNA ligase cytoplasmic OS=Zea mays OX=4577 GN=100384866 PE=4 SV=1;tr|A0A1D6LQT7|A0A1D6LQT7_MAIZE Isole	12.938	13.2	2	10	NaN	NaN	NaN	NaN	NaN	NaN	22.6493	NaN	NaN	NaN	NaN	NaN	NaN	NaN	NaN	NaN				2	2.5	2.5	89.435	92684000	11
tr|A0A1D6LS06|A0A1D6LS06_MAIZE Putative calcium-dependent lipid-binding (CaLB domain) family protein OS=Zea mays OX=4577 GN=ZEAMMB73_Zm00001d036830 PE=4 SV=1;tr|A0A1D6LS10|A0A1D6LS10_MAIZE Putative calcium-dependent lipid-binding (CaLB domain) family prote	2.7401	14.9	2	3	NaN	NaN	NaN	NaN	NaN	NaN	NaN	NaN	NaN	NaN	21.1813	NaN	NaN	NaN	NaN	NaN				2	9.8	9.8	30.505	5710100	2
tr|A0A1D6LSA0|A0A1D6LSA0_MAIZE D-aminoacyl-tRNA deacylase OS=Zea mays OX=4577 GN=100193788 PE=4 SV=1;tr|B4FGA9|B4FGA9_MAIZE D-aminoacyl-tRNA deacylase OS=Zea mays OX=4577 GN=100193788 PE=2 SV=1;tr|A0A1D6LS98|A0A1D6LS98_MAIZE D-aminoacyl-tRNA deacylase OS=Z	8.1515	15.1	2	2	NaN	23.3811	NaN	NaN	NaN	23.9437	NaN	NaN	NaN	NaN	NaN	NaN	NaN	NaN	NaN	NaN		carboxylic ester hydrolase activity;catalytic activity;D-aminoacyl-tRNA deacylase activity;hydrolase activity;hydrolase activity, acting on ester bonds		2	15.1	15.1	20.421	52228000	7
tr|A0A1D6LVZ7|A0A1D6LVZ7_MAIZE Putative LIM-type zinc finger domain family protein OS=Zea mays OX=4577 GN=103629948 PE=4 SV=1;tr|A0A1D6LVZ8|A0A1D6LVZ8_MAIZE Putative LIM-type zinc finger domain family protein OS=Zea mays OX=4577 GN=103629948 PE=4 SV=1	31.302	11.2	11	11	NaN	NaN	NaN	NaN	NaN	NaN	22.1974	NaN	NaN	NaN	NaN	NaN	NaN	NaN	NaN	NaN				11	11.2	11.2	156.62	350550000	32
tr|A0A1D6LXE6|A0A1D6LXE6_MAIZE Glycosyltransferase OS=Zea mays OX=4577 GN=ZEAMMB73_Zm00001d037384 PE=3 SV=1	11.237	21.9	7	9	NaN	NaN	23.9453	NaN	NaN	NaN	NaN	NaN	NaN	NaN	NaN	23.2344	NaN	NaN	23.7541	NaN				7	17.8	17.8	52.014	327190000	23
tr|A0A1D6LY69|A0A1D6LY69_MAIZE Putative clathrin assembly protein OS=Zea mays OX=4577 GN=100501232 PE=4 SV=1;tr|K7W5Z1|K7W5Z1_MAIZE Putative clathrin assembly protein OS=Zea mays OX=4577 GN=103638005 PE=4 SV=1;tr|A0A1D6NU34|A0A1D6NU34_MAIZE Putative clathr	5.231	5.4	2	2	NaN	NaN	22.8501	NaN	NaN	22.9441	NaN	NaN	NaN	NaN	NaN	NaN	NaN	NaN	NaN	NaN	cellular component assembly;cellular component assembly at cellular level;cellular component organization;cellular component organization at cellular level;cellular component organization or biogenesis;cellular component organization or biogenesis at cellular level;cellular macromolecular complex assembly;cellular macromolecular complex subunit organization;cellular process;cellular protein compl…	1-phosphatidylinositol binding;binding;lipid binding;phosphatidylinositol binding;phospholipid binding	cell part;clathrin-coated vesicle;coated vesicle;cytoplasmic membrane-bounded vesicle;cytoplasmic part;cytoplasmic vesicle;intracellular membrane-bounded organelle;intracellular organelle;intracellular part;membrane-bounded organelle;membrane-bounded vesicle;organelle;vesicle	2	5.4	5.4	61.017	215660000	19
tr|A0A1D6LZP8|A0A1D6LZP8_MAIZE Vegetative storage protein 2 OS=Zea mays OX=4577 GN=ZEAMMB73_Zm00001d037681 PE=4 SV=1	6.3683	11.2	2	2	24.5311	NaN	24.0415	23.4957	NaN	NaN	NaN	NaN	NaN	NaN	NaN	NaN	NaN	24.3007	NaN	NaN				2	11.2	11.2	30.649	97827000	6
tr|A0A1D6M0B8|A0A1D6M0B8_MAIZE Uncharacterized protein OS=Zea mays OX=4577 GN=100381974 PE=4 SV=1;tr|A0A1D6M0C9|A0A1D6M0C9_MAIZE Uncharacterized protein OS=Zea mays OX=4577 GN=100381974 PE=4 SV=1;tr|A0A1D6M0D0|A0A1D6M0D0_MAIZE Uncharacterized protein OS=Ze	12.351	16	4	10	NaN	NaN	NaN	NaN	NaN	NaN	NaN	NaN	NaN	NaN	NaN	NaN	NaN	NaN	24.2709	NaN				4	6.4	6.4	109.53	524280000	21
tr|C0P7J2|C0P7J2_MAIZE FHA domain-containing protein DDL OS=Zea mays OX=4577 GN=100192588 PE=2 SV=1;tr|A0A1D6M2D6|A0A1D6M2D6_MAIZE FHA domain-containing protein DDL OS=Zea mays OX=4577 GN=100192588 PE=4 SV=1;tr|A0A1D6M2D7|A0A1D6M2D7_MAIZE FHA domain-contai	15.433	9.1	4	4	NaN	NaN	NaN	22.5633	NaN	NaN	NaN	NaN	NaN	NaN	NaN	NaN	22.3762	NaN	NaN	NaN				4	9.1	9.1	61.974	98330000	11
tr|A0A1D6M2L2|A0A1D6M2L2_MAIZE AMP deaminase OS=Zea mays OX=4577 GN=ZEAMMB73_Zm00001d037982 PE=4 SV=1;tr|A0A1D6M2L0|A0A1D6M2L0_MAIZE AMP deaminase OS=Zea mays OX=4577 GN=ZEAMMB73_Zm00001d037982 PE=4 SV=1;tr|A0A1D6M2L3|A0A1D6M2L3_MAIZE AMP deaminase OS=Zea	3.4073	7.8	3	4	NaN	NaN	22.128	23.3419	22.4318	NaN	NaN	NaN	NaN	NaN	NaN	NaN	NaN	NaN	NaN	NaN				3	5.8	5.8	85.229	96119000	11
tr|A0A1D6M339|A0A1D6M339_MAIZE Carbon catabolite repressor protein 4 homolog 4 OS=Zea mays OX=4577 GN=ZEAMMB73_Zm00001d038091 PE=4 SV=1;tr|A0A1D6M342|A0A1D6M342_MAIZE Carbon catabolite repressor protein 4 homolog 4 OS=Zea mays OX=4577 GN=ZEAMMB73_Zm00001d0	3.4811	12.2	2	2	NaN	NaN	NaN	NaN	NaN	NaN	NaN	NaN	NaN	NaN	NaN	NaN	NaN	NaN	21.9669	NaN				2	12.2	12.2	23.986	19104000	3
tr|A0A1D6M3A1|A0A1D6M3A1_MAIZE Mannosylglycoprotein endo-beta-mannosidase OS=Zea mays OX=4577 GN=103630319 PE=4 SV=1;tr|A0A1D6M393|A0A1D6M393_MAIZE Mannosylglycoprotein endo-beta-mannosidase OS=Zea mays OX=4577 GN=103630319 PE=4 SV=1;tr|A0A1D6M372|A0A1D6M3	10.203	4.9	2	2	23.1157	23.1404	NaN	NaN	NaN	NaN	NaN	NaN	NaN	NaN	NaN	22.678	NaN	NaN	NaN	NaN				2	4.9	4.9	73.74	95923000	16
tr|A0A1D6M4G1|A0A1D6M4G1_MAIZE Beta-hexosaminidase 3 OS=Zea mays OX=4577 GN=103630365 PE=4 SV=1;tr|A0A1D6M4F9|A0A1D6M4F9_MAIZE Beta-hexosaminidase OS=Zea mays OX=4577 GN=103630365 PE=3 SV=1;tr|A0A1D6M4F8|A0A1D6M4F8_MAIZE Beta-hexosaminidase OS=Zea mays OX=	53.152	11.9	4	4	23.3589	NaN	NaN	NaN	NaN	NaN	NaN	NaN	NaN	NaN	NaN	NaN	NaN	NaN	NaN	NaN				4	11.9	11.9	36.494	207160000	18
tr|A0A1D6M4Z8|A0A1D6M4Z8_MAIZE Glycosyl hydrolase family protein OS=Zea mays OX=4577 GN=100279291 PE=4 SV=1;tr|B7ZXD3|B7ZXD3_MAIZE Glycosyl hydrolase family protein OS=Zea mays OX=4577 GN=100279291 PE=2 SV=1;tr|A0A1D6M4Z2|A0A1D6M4Z2_MAIZE Glycosyl hydrolas	52.257	13.2	4	6	NaN	NaN	NaN	NaN	23.8687	NaN	NaN	23.2329	NaN	NaN	NaN	NaN	NaN	NaN	NaN	NaN	carbohydrate metabolic process;metabolic process;primary metabolic process	catalytic activity;hydrolase activity;hydrolase activity, acting on glycosyl bonds;hydrolase activity, hydrolyzing O-glycosyl compounds		4	11.2	11.2	60.775	205880000	13
tr|A0A1D6M6X2|A0A1D6M6X2_MAIZE Putative leucine-rich repeat receptor-like protein kinase family protein OS=Zea mays OX=4577 GN=103630517 PE=3 SV=1;tr|A0A1D6M6X3|A0A1D6M6X3_MAIZE Putative leucine-rich repeat receptor-like protein kinase family protein OS=Ze	34.498	38.4	9	12	NaN	NaN	NaN	NaN	NaN	NaN	23.9337	NaN	NaN	NaN	NaN	NaN	NaN	NaN	NaN	NaN				12	38.4	32.2	42.794	435070000	33
tr|A0A1D6M748|A0A1D6M748_MAIZE UDP-glycosyltransferase 88A1 OS=Zea mays OX=4577 GN=103630531 PE=4 SV=1;tr|B4F9P0|B4F9P0_MAIZE Glycosyltransferase OS=Zea mays OX=4577 GN=100191664 PE=2 SV=1;tr|K7UWD9|K7UWD9_MAIZE UDP-glycosyltransferase 88A1 OS=Zea mays OX=	2.9988	16.3	3	3	NaN	24.1133	24.0329	24.0018	NaN	NaN	NaN	NaN	NaN	NaN	NaN	NaN	NaN	NaN	NaN	NaN		catalytic activity;transferase activity;transferase activity, transferring glycosyl groups;transferase activity, transferring hexosyl groups		3	16.3	16.3	31.897	113660000	5
tr|A0A1D6MCS8|A0A1D6MCS8_MAIZE Guanylate-binding family protein OS=Zea mays OX=4577 GN=ZEAMMB73_Zm00001d039005 PE=4 SV=1;tr|A0A1D6MCT0|A0A1D6MCT0_MAIZE Guanylate-binding family protein OS=Zea mays OX=4577 GN=ZEAMMB73_Zm00001d039005 PE=4 SV=1;tr|A0A1D6MCT8|	42.425	14	5	11	NaN	NaN	NaN	NaN	NaN	NaN	NaN	NaN	NaN	NaN	22.5151	NaN	NaN	NaN	NaN	NaN				11	14	8.1	117.55	209750000	10
tr|A0A1D6MCZ6|A0A1D6MCZ6_MAIZE Putative DUF1296 domain containing family protein OS=Zea mays OX=4577 GN=103630744 PE=4 SV=1;tr|A0A1D6MD02|A0A1D6MD02_MAIZE Putative DUF1296 domain containing family protein OS=Zea mays OX=4577 GN=103630744 PE=4 SV=1;tr|A0A1D	60.548	18.4	7	10	NaN	NaN	NaN	NaN	NaN	NaN	NaN	NaN	NaN	23.1987	23.394	23.4823	23.359	24.0679	NaN	NaN				10	18.4	16.1	90.825	395130000	40
tr|Q9M582|Q9M582_MAIZE Hypersensitive induced reaction3 OS=Zea mays OX=4577 GN=HIR3 PE=2 SV=1;tr|A0A1D6ME98|A0A1D6ME98_MAIZE Hypersensitive induced reaction3 OS=Zea mays OX=4577 GN=541821 PE=4 SV=1;tr|A0A1D6ME99|A0A1D6ME99_MAIZE Hypersensitive induced reac	9.8759	27.2	6	6	NaN	NaN	NaN	NaN	NaN	26.3759	NaN	NaN	NaN	NaN	NaN	NaN	NaN	NaN	NaN	NaN			cell part;membrane	6	27.2	27.2	31.554	352180000	15
tr|A0A1D6MF07|A0A1D6MF07_MAIZE VHS domain-containing protein OS=Zea mays OX=4577 GN=103649541 PE=4 SV=1;tr|A0A1D6MF05|A0A1D6MF05_MAIZE VHS domain-containing protein OS=Zea mays OX=4577 GN=103649541 PE=4 SV=1;tr|A0A1D6MF04|A0A1D6MF04_MAIZE VHS domain-contai	43.87	33.1	5	15	NaN	NaN	NaN	NaN	NaN	NaN	NaN	NaN	NaN	NaN	23.6352	NaN	23.8103	NaN	NaN	NaN				15	33.1	15.1	71.908	471710000	33
tr|A0A1D6MH98|A0A1D6MH98_MAIZE Phosphoribosylaminoimidazole carboxylase family protein / AIR carboxylase family protein OS=Zea mays OX=4577 GN=100501865 PE=3 SV=1;tr|C4J6I7|C4J6I7_MAIZE Phosphoribosylaminoimidazole carboxylase family protein / AIR carboxyl	25.418	26.7	1	13	NaN	22.7625	NaN	NaN	NaN	NaN	NaN	NaN	NaN	NaN	NaN	NaN	24.4811	NaN	NaN	NaN	biosynthetic process;cellular biosynthetic process;cellular metabolic process;cellular nitrogen compound biosynthetic process;cellular nitrogen compound metabolic process;cellular process;'de novo' IMP biosynthetic process;heterocycle biosynthetic process;heterocycle metabolic process;IMP biosynthetic process;IMP metabolic process;metabolic process;nitrogen compound metabolic process;nucleobase-c…	adenyl nucleotide binding;adenyl ribonucleotide binding;ATP binding;binding;carbon-carbon lyase activity;carboxy-lyase activity;catalytic activity;cation binding;ion binding;lyase activity;metal ion binding;nucleotide binding;phosphoribosylaminoimidazole carboxylase activity;purine nucleotide binding;purine ribonucleoside triphosphate binding;purine ribonucleotide binding;ribonucleotide binding		13	26.7	2.1	63.444	222360000	10
tr|A0A1D6MIP8|A0A1D6MIP8_MAIZE Histidine--tRNA ligase chloroplastic/mitochondrial OS=Zea mays OX=4577 GN=ZEAMMB73_Zm00001d039578 PE=4 SV=1;tr|A0A1D6MIQ0|A0A1D6MIQ0_MAIZE Histidine--tRNA ligase chloroplastic/mitochondrial OS=Zea mays OX=4577 GN=ZEAMMB73_Zm0	8.0065	18.3	5	5	NaN	NaN	NaN	24.2551	NaN	NaN	24.69	24.9445	NaN	NaN	NaN	NaN	NaN	NaN	NaN	NaN				5	18.3	18.3	43.456	279880000	4
tr|B4FKD4|B4FKD4_MAIZE Acyl-protein thioesterase 2 OS=Zea mays OX=4577 GN=100283662 PE=2 SV=1;tr|A0A1D6MK03|A0A1D6MK03_MAIZE Multidrug resistance associated protein7 OS=Zea mays OX=4577 GN=100283662 PE=4 SV=1;tr|A0A1D6MJZ6|A0A1D6MJZ6_MAIZE Multidrug resist	16.986	27.8	6	6	NaN	24.7615	24.3196	NaN	23.1999	24.4735	NaN	NaN	24.1568	23.889	24.2557	24.3809	NaN	NaN	NaN	NaN		catalytic activity;hydrolase activity		6	27.8	27.8	26.847	555980000	38
tr|A0A1D6MKS3|A0A1D6MKS3_MAIZE Uncharacterized protein OS=Zea mays OX=4577 GN=ZEAMMB73_Zm00001d039721 PE=4 SV=1	2.4761	4.5	2	3	NaN	NaN	NaN	23.6349	NaN	23.3556	NaN	NaN	NaN	NaN	NaN	NaN	NaN	NaN	NaN	NaN				2	4.5	4.5	37.681	126040000	10
tr|A0A1D6ML13|A0A1D6ML13_MAIZE Acyl-coenzyme A oxidase 4 peroxisomal OS=Zea mays OX=4577 GN=ZEAMMB73_Zm00001d039768 PE=3 SV=1;tr|A0A1D6ML15|A0A1D6ML15_MAIZE Acyl-coenzyme A oxidase 4 peroxisomal OS=Zea mays OX=4577 GN=ZEAMMB73_Zm00001d039768 PE=3 SV=1	1.4339	7.1	2	2	NaN	NaN	NaN	NaN	NaN	NaN	NaN	NaN	NaN	NaN	22.6591	NaN	NaN	NaN	NaN	NaN				2	7.1	7.1	47.017	60979000	3
tr|A0A1D6MLK3|A0A1D6MLK3_MAIZE Mitochondrial glycoprotein family protein OS=Zea mays OX=4577 GN=ZEAMMB73_Zm00001d039883 PE=4 SV=1	72.162	14.6	4	4	NaN	NaN	NaN	21.6061	NaN	NaN	23.237	NaN	NaN	NaN	NaN	21.2941	NaN	NaN	NaN	NaN				4	14.6	14.6	27.855	361270000	34
tr|A0A1D6MM31|A0A1D6MM31_MAIZE Alpha-xylosidase 1 OS=Zea mays OX=4577 GN=100501905 PE=3 SV=1	44.878	3	2	2	NaN	NaN	NaN	NaN	NaN	23.4311	NaN	NaN	NaN	NaN	NaN	NaN	NaN	NaN	NaN	NaN				2	3	3	102.34	121840000	7
tr|A0A1D6MM59|A0A1D6MM59_MAIZE Uncharacterized protein OS=Zea mays OX=4577 GN=100382048 PE=4 SV=1;tr|A0A1D6MM57|A0A1D6MM57_MAIZE Uncharacterized protein OS=Zea mays OX=4577 GN=100382048 PE=4 SV=1;tr|A0A1D6MM62|A0A1D6MM62_MAIZE Uncharacterized protein OS=Ze	90.254	23.4	6	12	NaN	NaN	NaN	NaN	NaN	NaN	NaN	NaN	NaN	NaN	NaN	23.2289	NaN	NaN	23.5433	NaN				12	23.4	13.6	62.966	431230000	25
tr|A0A1D6MMA5|A0A1D6MMA5_MAIZE Multicopper oxidase LPR2 OS=Zea mays OX=4577 GN=100275791 PE=4 SV=1	3.1627	4.7	2	2	NaN	NaN	NaN	NaN	NaN	NaN	NaN	NaN	NaN	NaN	NaN	NaN	23.1478	NaN	NaN	NaN				2	4.7	4.7	66.237	24659000	4
tr|A0A1D6MPN8|A0A1D6MPN8_MAIZE Importin subunit alpha OS=Zea mays OX=4577 GN=103649953 PE=3 SV=1;tr|A0A1D6MPN7|A0A1D6MPN7_MAIZE Importin subunit alpha OS=Zea mays OX=4577 GN=103649953 PE=3 SV=1;tr|A0A1D6MPN9|A0A1D6MPN9_MAIZE Importin subunit alpha OS=Zea m	48.62	41.4	4	14	NaN	24.5689	NaN	NaN	NaN	NaN	NaN	NaN	NaN	NaN	NaN	NaN	NaN	NaN	NaN	NaN				12	36.7	12.7	57.659	362250000	11
tr|A0A1D6MPQ2|A0A1D6MPQ2_MAIZE Topless-related1 OS=Zea mays OX=4577 GN=103649954 PE=4 SV=1;tr|A0A1D6MPQ6|A0A1D6MPQ6_MAIZE Topless-related1 OS=Zea mays OX=4577 GN=103649954 PE=4 SV=1;tr|A0A1D6MPP8|A0A1D6MPP8_MAIZE Topless-related1 OS=Zea mays OX=4577 GN=103	6.33	9.9	3	8	NaN	NaN	NaN	NaN	NaN	NaN	NaN	NaN	NaN	NaN	23.37	NaN	NaN	NaN	NaN	NaN				4	6.1	4.2	119.82	197590000	13
tr|A0A1D6MRK3|A0A1D6MRK3_MAIZE Ribosomal protein L18e/L15 superfamily protein OS=Zea mays OX=4577 GN=ZEAMMB73_Zm00001d040588 PE=4 SV=1;tr|A0A1D6MRK1|A0A1D6MRK1_MAIZE Ribosomal protein L18e/L15 superfamily protein OS=Zea mays OX=4577 GN=ZEAMMB73_Zm00001d040	4.4384	15.6	2	2	NaN	NaN	NaN	NaN	NaN	NaN	NaN	NaN	NaN	NaN	NaN	NaN	NaN	NaN	NaN	21.5153				2	15.6	15.6	15.049	116130000	14
tr|A0A1D6MSB3|A0A1D6MSB3_MAIZE Crs2 associated factor2 OS=Zea mays OX=4577 GN=542682 PE=4 SV=1;sp|Q84N48|CAF2P_MAIZE CRS2-associated factor 2, chloroplastic OS=Zea mays OX=4577 GN=CAF2 PE=1 SV=1;tr|A0A1R3PFL4|A0A1R3PFL4_MAIZE Crs2 associated factor2 OS=Zea	7.2757	11.4	2	2	NaN	NaN	NaN	NaN	NaN	NaN	NaN	NaN	NaN	NaN	NaN	NaN	NaN	22.3139	NaN	NaN	cellular macromolecule metabolic process;cellular metabolic process;cellular nitrogen compound metabolic process;cellular process;Group II intron splicing;macromolecule metabolic process;metabolic process;mRNA metabolic process;mRNA processing;nitrogen compound metabolic process;nucleic acid metabolic process;nucleobase-containing compound metabolic process;primary metabolic process;RNA metabolic…	binding;nucleic acid binding;RNA binding	cell part;chloroplast part;chloroplast stroma;cytoplasmic part;intracellular organelle part;intracellular part;macromolecular complex;organelle part;plastid part;plastid stroma;ribonucleoprotein complex	2	11.4	11.4	48.373	8358200	2
tr|A0A1D6MSI1|A0A1D6MSI1_MAIZE Carboxypeptidase OS=Zea mays OX=4577 GN=100282195 PE=3 SV=1;tr|A0A1D6MSI0|A0A1D6MSI0_MAIZE Carboxypeptidase OS=Zea mays OX=4577 GN=100282195 PE=3 SV=1;tr|C0PHM0|C0PHM0_MAIZE Carboxypeptidase OS=Zea mays OX=4577 GN=100282195 P	1.6943	8.2	2	2	NaN	NaN	NaN	NaN	NaN	NaN	NaN	NaN	NaN	NaN	NaN	NaN	22.4923	NaN	NaN	NaN		carboxypeptidase activity;catalytic activity;exopeptidase activity;hydrolase activity;peptidase activity;peptidase activity, acting on L-amino acid peptides;serine hydrolase activity;serine-type carboxypeptidase activity;serine-type exopeptidase activity;serine-type peptidase activity		2	8.2	8.2	38.109	21602000	3
tr|A0A1D6MTK5|A0A1D6MTK5_MAIZE NAD(P)-binding Rossmann-fold superfamily protein OS=Zea mays OX=4577 GN=ZEAMMB73_Zm00001d040953 PE=4 SV=1	3.4967	14.7	2	2	22.4236	22.5209	NaN	NaN	NaN	22.6366	NaN	NaN	22.4257	NaN	21.5889	22.1936	NaN	NaN	NaN	NaN				2	14.7	14.7	20.693	87896000	10
tr|A0A1D6MUP9|A0A1D6MUP9_MAIZE Beta-glucosidase 17 OS=Zea mays OX=4577 GN=103650331 PE=3 SV=1	53.833	22.1	7	10	NaN	NaN	NaN	NaN	NaN	NaN	NaN	NaN	NaN	NaN	NaN	NaN	NaN	NaN	NaN	24.2441				7	17.7	17.7	58.981	320260000	29
tr|A0A1D6MUQ1|A0A1D6MUQ1_MAIZE Beta-glucosidase 17 OS=Zea mays OX=4577 GN=103650330 PE=3 SV=1	323.31	54.3	28	36	NaN	NaN	NaN	NaN	22.7715	NaN	NaN	NaN	NaN	NaN	NaN	25.2159	NaN	NaN	NaN	NaN				30	48.9	47.1	63.3	18531000000	459
tr|A0A1D6MUZ5|A0A1D6MUZ5_MAIZE Protein kinase family protein OS=Zea mays OX=4577 GN=100273539 PE=4 SV=1;tr|A0A1D6MUZ7|A0A1D6MUZ7_MAIZE Protein kinase family protein OS=Zea mays OX=4577 GN=100273539 PE=4 SV=1;tr|A0A1D6LW84|A0A1D6LW84_MAIZE Microtubule-assoc	27.866	8.4	4	4	NaN	NaN	NaN	NaN	NaN	NaN	NaN	NaN	NaN	NaN	NaN	NaN	NaN	NaN	NaN	22.7442	cellular component organization;cellular component organization at cellular level;cellular component organization or biogenesis;cellular component organization or biogenesis at cellular level;cellular process;cytoskeleton organization;organelle organization			4	8.4	8.4	64.6	137170000	17
tr|A0A1D6MVH5|A0A1D6MVH5_MAIZE Kinesin-like protein OS=Zea mays OX=4577 GN=ZEAMMB73_Zm00001d041323 PE=3 SV=1;tr|A0A1D6MVH2|A0A1D6MVH2_MAIZE Kinesin-like protein OS=Zea mays OX=4577 GN=ZEAMMB73_Zm00001d041323 PE=3 SV=1;tr|A0A1D6MVH1|A0A1D6MVH1_MAIZE Kinesin	1.5945	3	2	2	NaN	NaN	NaN	NaN	NaN	NaN	NaN	NaN	NaN	NaN	23.2797	NaN	NaN	NaN	NaN	NaN				2	3	3	87.534	77322000	4
tr|B8A0P5|B8A0P5_MAIZE CTP synthase OS=Zea mays OX=4577 GN=100280500 PE=2 SV=1;tr|A0A1D6MXD3|A0A1D6MXD3_MAIZE CTP synthase OS=Zea mays OX=4577 GN=100280500 PE=3 SV=1;tr|A0A1D6MXC8|A0A1D6MXC8_MAIZE CTP synthase OS=Zea mays OX=4577 GN=100280500 PE=3 SV=1;tr|	7.6565	16.1	4	7	NaN	NaN	NaN	NaN	NaN	NaN	NaN	NaN	NaN	NaN	23.583	NaN	23.8548	NaN	NaN	NaN	amine metabolic process;biosynthetic process;carboxylic acid metabolic process;cellular amine metabolic process;cellular amino acid metabolic process;cellular biosynthetic process;cellular ketone metabolic process;cellular metabolic process;cellular nitrogen compound biosynthetic process;cellular nitrogen compound metabolic process;cellular process;CTP biosynthetic process;CTP metabolic process;'…	adenyl nucleotide binding;adenyl ribonucleotide binding;ATP binding;binding;catalytic activity;CTP synthase activity;ligase activity;ligase activity, forming carbon-nitrogen bonds;nucleotide binding;purine nucleotide binding;purine ribonucleoside triphosphate binding;purine ribonucleotide binding;ribonucleotide binding		4	11.1	11.1	63.825	361000000	17
tr|A0A1D6MXH5|A0A1D6MXH5_MAIZE Auxilin-related protein 1 OS=Zea mays OX=4577 GN=103650566 PE=4 SV=1;tr|A0A1D6MXH6|A0A1D6MXH6_MAIZE Auxilin-related protein 1 OS=Zea mays OX=4577 GN=103650566 PE=4 SV=1;tr|A0A1D6MXH7|A0A1D6MXH7_MAIZE Auxilin-related protein 1	74.184	24.7	9	14	NaN	NaN	NaN	NaN	NaN	NaN	NaN	NaN	24.5565	NaN	24.4701	NaN	24.4396	NaN	NaN	NaN				14	24.7	18.5	97.075	478060000	44
tr|A0A1D6MXL7|A0A1D6MXL7_MAIZE UDP-D-apiose/UDP-D-xylose synthase 2 OS=Zea mays OX=4577 GN=542159 PE=4 SV=1;tr|B6TQB1|B6TQB1_MAIZE Bifunctional polymyxin resistance arnA protein OS=Zea mays OX=4577 GN=542159 PE=2 SV=1;tr|K7V5A8|K7V5A8_MAIZE UDP-D-apiose/UD	19.301	35.7	4	4	NaN	23.3408	23.7031	NaN	NaN	NaN	NaN	NaN	NaN	NaN	NaN	22.9474	NaN	NaN	NaN	NaN		binding;catalytic activity;coenzyme binding;cofactor binding		4	35.7	35.7	19.037	194510000	13
tr|A0A1D6MXM9|A0A1D6MXM9_MAIZE Acyl-CoA-binding domain-containing protein 4 OS=Zea mays OX=4577 GN=ZEAMMB73_Zm00001d041692 PE=4 SV=1;tr|A0A1D6MXN0|A0A1D6MXN0_MAIZE Acyl-CoA-binding domain-containing protein 4 OS=Zea mays OX=4577 GN=ZEAMMB73_Zm00001d041692	17.365	12.3	4	4	NaN	NaN	21.7007	NaN	NaN	NaN	NaN	NaN	NaN	NaN	NaN	NaN	NaN	NaN	NaN	NaN				4	12.3	12.3	60.107	131240000	20
tr|A0A1D6MXT5|A0A1D6MXT5_MAIZE Auxin-binding protein 1 OS=Zea mays OX=4577 GN=542232 PE=4 SV=1;tr|A0A1D6MXT4|A0A1D6MXT4_MAIZE Auxin-binding protein 1 OS=Zea mays OX=4577 GN=542232 PE=4 SV=1;tr|A0A1D6MXT1|A0A1D6MXT1_MAIZE Auxin-binding protein 1 OS=Zea mays	2.2522	24.2	2	2	NaN	NaN	NaN	NaN	NaN	NaN	NaN	NaN	NaN	NaN	23.348	NaN	23.8254	23.4302	NaN	NaN	auxin mediated signaling pathway;biological regulation;cellular process;cellular response to auxin stimulus;cellular response to chemical stimulus;cellular response to endogenous stimulus;cellular response to hormone stimulus;cellular response to organic substance;cellular response to stimulus;hormone-mediated signaling pathway;regulation of biological process;regulation of cellular process;respo…	auxin binding;binding;cation binding;hormone binding;ion binding;metal ion binding;receptor activity;transition metal ion binding;zinc ion binding	cell part;cytoplasmic part;endoplasmic reticulum lumen;endoplasmic reticulum part;intracellular organelle lumen;intracellular organelle part;intracellular part;membrane-enclosed lumen;organelle lumen;organelle part	2	24.2	24.2	16.806	140360000	7
tr|A0A1D6MY51|A0A1D6MY51_MAIZE Zinc-finger homeodomain protein 4 OS=Zea mays OX=4577 GN=ZEAMMB73_Zm00001d041780 PE=4 SV=1	3.1858	8.9	2	2	NaN	22.1301	NaN	NaN	NaN	NaN	NaN	NaN	NaN	NaN	NaN	NaN	NaN	NaN	NaN	NaN				2	8.9	8.9	36.904	26285000	2
tr|A0A1D6MYI7|A0A1D6MYI7_MAIZE Tat pathway signal sequence family protein OS=Zea mays OX=4577 GN=ZEAMMB73_Zm00001d041824 PE=4 SV=1	6.9008	12.4	3	3	24.5606	25.4615	24.6048	NaN	NaN	25.5104	NaN	NaN	25.3357	NaN	NaN	25.6081	NaN	NaN	NaN	NaN				3	12.4	12.4	23.056	202200000	11
tr|B4FD17|B4FD17_MAIZE Dihydrolipoamide acetyltransferase component of pyruvate dehydrogenase complex OS=Zea mays OX=4577 GN=100192900 PE=2 SV=1;tr|A0A1D6MYM9|A0A1D6MYM9_MAIZE Dihydrolipoamide acetyltransferase component of pyruvate dehydrogenase complex O	16.996	30.9	3	14	NaN	NaN	22.0306	NaN	NaN	NaN	NaN	NaN	22.7095	NaN	NaN	NaN	NaN	NaN	NaN	NaN		catalytic activity;transferase activity;transferase activity, transferring acyl groups		3	12.3	12.3	47.878	81877000	9
tr|A0A1D6N0F1|A0A1D6N0F1_MAIZE Beta-fructofuranosidase insoluble isoenzyme CWINV3 OS=Zea mays OX=4577 GN=ZEAMMB73_Zm00001d041991 PE=3 SV=1	40.722	27.4	11	13	NaN	NaN	NaN	NaN	NaN	NaN	23.1653	NaN	NaN	NaN	NaN	NaN	NaN	NaN	NaN	NaN				13	27.4	26	69.219	976040000	50
tr|C0PNP8|C0PNP8_MAIZE Amino acid kinase family protein OS=Zea mays OX=4577 GN=100282859 PE=2 SV=1;tr|B4FSB1|B4FSB1_MAIZE Amino acid kinase family protein OS=Zea mays OX=4577 GN=100282859 PE=2 SV=1;tr|A0A1D6N0H0|A0A1D6N0H0_MAIZE Amino acid kinase family pr	2.5735	14.3	2	2	NaN	NaN	NaN	NaN	NaN	NaN	NaN	NaN	NaN	NaN	NaN	NaN	NaN	NaN	NaN	22.7695	biosynthetic process;cellular biosynthetic process;cellular metabolic process;cellular nitrogen compound biosynthetic process;cellular nitrogen compound metabolic process;cellular process;heterocycle biosynthetic process;heterocycle metabolic process;metabolic process;nitrogen compound metabolic process;nucleobase-containing compound biosynthetic process;nucleobase-containing compound metabolic p…	catalytic activity;kinase activity;nucleobase-containing compound kinase activity;nucleotide kinase activity;phosphotransferase activity, phosphate group as acceptor;transferase activity;transferase activity, transferring phosphorus-containing groups;UMP kinase activity;uridylate kinase activity	cell part;cytoplasm;intracellular part	2	14.3	14.3	20.053	22368000	1
tr|A0A1D6N252|A0A1D6N252_MAIZE PsbP domain-containing protein 7 chloroplastic OS=Zea mays OX=4577 GN=ZEAMMB73_Zm00001d042211 PE=4 SV=1	1.9094	12	2	2	NaN	NaN	NaN	NaN	NaN	NaN	NaN	NaN	NaN	NaN	NaN	23.1388	NaN	NaN	NaN	NaN				2	12	12	30.633	12233000	2
tr|A0A1D6N297|A0A1D6N297_MAIZE Ribosomal protein S18 OS=Zea mays OX=4577 GN=ZEAMMB73_Zm00001d042233 PE=3 SV=1;tr|A0A1D6N296|A0A1D6N296_MAIZE Ribosomal protein S18 OS=Zea mays OX=4577 GN=ZEAMMB73_Zm00001d042233 PE=3 SV=1	22.346	53.9	4	11	23.3135	NaN	NaN	NaN	NaN	NaN	NaN	NaN	NaN	NaN	NaN	NaN	NaN	NaN	NaN	NaN				4	21.7	21.7	34.327	331930000	26
tr|A0A1D6N330|A0A1D6N330_MAIZE Alpha/beta-Hydrolases superfamily protein OS=Zea mays OX=4577 GN=ZEAMMB73_Zm00001d042346 PE=4 SV=1	4.1018	27.1	3	3	NaN	NaN	NaN	NaN	NaN	NaN	NaN	NaN	NaN	NaN	NaN	NaN	NaN	NaN	NaN	24.2115				3	27.1	27.1	26.616	84835000	4
tr|A0A1D6N358|A0A1D6N358_MAIZE Sucrose phosphate synthase2 OS=Zea mays OX=4577 GN=103650849 PE=3 SV=1;tr|A0A1D6N360|A0A1D6N360_MAIZE Sucrose phosphate synthase2 OS=Zea mays OX=4577 GN=103650849 PE=3 SV=1	2.939	31.5	2	28	NaN	NaN	NaN	NaN	NaN	NaN	NaN	NaN	NaN	21.8921	21.6838	21.2689	NaN	21.9706	NaN	NaN				2	2.7	2.7	119.42	187310000	4
tr|A0A1D6N385|A0A1D6N385_MAIZE Zinc finger CCCH domain-containing protein 33 OS=Zea mays OX=4577 GN=ZEAMMB73_Zm00001d042363 PE=4 SV=1;tr|A0A1D6N383|A0A1D6N383_MAIZE Zinc finger CCCH domain-containing protein 33 OS=Zea mays OX=4577 GN=ZEAMMB73_Zm00001d04236	5.9484	13.1	2	2	NaN	NaN	NaN	NaN	NaN	NaN	NaN	NaN	NaN	NaN	NaN	NaN	NaN	NaN	23.097	NaN				2	13.1	13.1	36.079	48075000	3
tr|C0PHF1|C0PHF1_MAIZE AP-4 complex subunit epsilon OS=Zea mays OX=4577 GN=100383591 PE=2 SV=1;tr|A0A1D6N3A6|A0A1D6N3A6_MAIZE AP-4 complex subunit epsilon OS=Zea mays OX=4577 GN=100383591 PE=3 SV=1;tr|A0A1D6N3A1|A0A1D6N3A1_MAIZE AP-4 complex subunit epsilo	72.57	13.9	6	8	NaN	NaN	23.586	NaN	NaN	NaN	NaN	NaN	22.8893	23.2377	NaN	23.4176	23.4946	22.8412	NaN	NaN	cellular process;establishment of localization;establishment of localization in cell;establishment of protein localization;intracellular protein transport;intracellular transport;protein transport;transport;vesicle-mediated transport		cell part;cytoplasmic part;intracellular part;macromolecular complex;membrane coat;membrane part;protein complex	8	13.9	11.4	105.54	370800000	32
tr|A0A1D6N3J0|A0A1D6N3J0_MAIZE Dolichyl-diphosphooligosaccharide--protein glycosyltransferase subunit 2 OS=Zea mays OX=4577 GN=ZEAMMB73_Zm00001d042398 PE=4 SV=1;tr|A0A1D6N3J1|A0A1D6N3J1_MAIZE Dolichyl-diphosphooligosaccharide--protein glycosyltransferase s	21.823	21.7	10	10	NaN	NaN	23.661	NaN	NaN	NaN	NaN	NaN	NaN	NaN	NaN	NaN	NaN	NaN	NaN	NaN				10	21.7	21.7	74.998	667660000	54
tr|A0A1D6N5B6|A0A1D6N5B6_MAIZE KH domain-containing protein OS=Zea mays OX=4577 GN=100274205 PE=4 SV=1	5.2208	19.1	3	5	NaN	NaN	NaN	NaN	NaN	23.2531	NaN	NaN	NaN	NaN	NaN	NaN	NaN	NaN	NaN	NaN				5	19.1	13.3	32.879	196910000	10
tr|A0A1D6N5L5|A0A1D6N5L5_MAIZE Extradiol ring-cleavage dioxygenase OS=Zea mays OX=4577 GN=103650928 PE=4 SV=1;tr|A0A1D6N5L6|A0A1D6N5L6_MAIZE Extradiol ring-cleavage dioxygenase OS=Zea mays OX=4577 GN=103650928 PE=4 SV=1	9.5334	23.5	4	5	NaN	23.6634	23.7988	NaN	NaN	NaN	NaN	NaN	NaN	NaN	NaN	NaN	NaN	NaN	NaN	NaN				5	23.5	19.7	35.282	180060000	11
tr|A0A1D6N6H9|A0A1D6N6H9_MAIZE Anthocyanidin 3-O-glucosyltransferase OS=Zea mays OX=4577 GN=ZEAMMB73_Zm00001d042739 PE=4 SV=1	8.3464	15.5	4	5	23.9608	24.5894	24.3958	NaN	NaN	NaN	NaN	NaN	NaN	NaN	NaN	NaN	NaN	NaN	NaN	NaN				5	15.5	13	52.581	85405000	5
tr|A0A1D6N6Q1|A0A1D6N6Q1_MAIZE Uncharacterized protein OS=Zea mays OX=4577 GN=ZEAMMB73_Zm00001d042783 PE=4 SV=1;tr|A0A1D6GK76|A0A1D6GK76_MAIZE Uncharacterized protein OS=Zea mays OX=4577 GN=ZEAMMB73_Zm00001d013517 PE=4 SV=1;tr|A0A1D6L072|A0A1D6L072_MAIZE U	5.3499	10.8	2	2	NaN	23.0677	NaN	NaN	NaN	NaN	NaN	NaN	NaN	22.6619	NaN	NaN	NaN	NaN	NaN	NaN				2	10.8	10.8	20.052	104860000	6
tr|A0A1D6N836|A0A1D6N836_MAIZE ENTH/VHS/GAT family protein OS=Zea mays OX=4577 GN=103651056 PE=4 SV=1	24.51	22.2	7	7	NaN	NaN	NaN	NaN	NaN	23.9115	NaN	NaN	NaN	NaN	NaN	NaN	NaN	NaN	NaN	NaN				7	22.2	22.2	67.075	355220000	30
tr|A0A1D6N9X7|A0A1D6N9X7_MAIZE Insulin-degrading enzyme-like 1 peroxisomal OS=Zea mays OX=4577 GN=103651144 PE=3 SV=1;tr|A0A1D6N9X6|A0A1D6N9X6_MAIZE Insulin-degrading enzyme-like 1 peroxisomal OS=Zea mays OX=4577 GN=103651144 PE=3 SV=1;tr|A0A1D6N9W3|A0A1D6	21.397	13.1	10	10	NaN	NaN	23.4672	NaN	NaN	NaN	NaN	23.8983	NaN	23.9508	NaN	NaN	NaN	NaN	NaN	NaN				10	13.1	13.1	109.35	464210000	23
tr|B4FY37|B4FY37_MAIZE Orphans transcription factor OS=Zea mays OX=4577 GN=Orphan313 PE=2 SV=1;tr|A0A1D6NE16|A0A1D6NE16_MAIZE Protein IQ-DOMAIN 31 OS=Zea mays OX=4577 GN=100273911 PE=4 SV=1;tr|A0A1D6NE23|A0A1D6NE23_MAIZE Protein IQ-DOMAIN 31 OS=Zea mays OX	16.92	9.3	4	4	NaN	NaN	NaN	NaN	NaN	NaN	NaN	NaN	NaN	NaN	NaN	NaN	21.5894	NaN	NaN	NaN				4	9.3	9.3	61.825	72286000	15
tr|A0A1D6NHR4|A0A1D6NHR4_MAIZE Rubisco methyltransferase family protein OS=Zea mays OX=4577 GN=ZEAMMB73_Zm00001d044101 PE=4 SV=1;tr|A0A1D6NHR3|A0A1D6NHR3_MAIZE Rubisco methyltransferase family protein OS=Zea mays OX=4577 GN=ZEAMMB73_Zm00001d044101 PE=4 SV=	2.6071	14.6	2	4	NaN	NaN	NaN	NaN	NaN	NaN	NaN	NaN	NaN	NaN	NaN	NaN	NaN	NaN	NaN	21.8556				2	7.6	7.6	43.345	19672000	4
tr|A0A1D6NHS9|A0A1D6NHS9_MAIZE Glycosyltransferase OS=Zea mays OX=4577 GN=ZEAMMB73_Zm00001d044106 PE=3 SV=1	6.7669	13.9	4	4	NaN	23.9054	NaN	NaN	NaN	NaN	NaN	NaN	NaN	NaN	NaN	NaN	NaN	NaN	NaN	NaN				4	13.9	13.9	52.045	46699000	5
tr|A0A1D6NK31|A0A1D6NK31_MAIZE Protein ROOT HAIR DEFECTIVE 3 homolog OS=Zea mays OX=4577 GN=ZEAMMB73_Zm00001d044271 PE=3 SV=1;tr|A0A1D6NK18|A0A1D6NK18_MAIZE Protein ROOT HAIR DEFECTIVE 3 homolog OS=Zea mays OX=4577 GN=ZEAMMB73_Zm00001d044271 PE=3 SV=1;tr|A	29.029	34.4	7	17	NaN	NaN	NaN	NaN	NaN	NaN	NaN	NaN	NaN	NaN	NaN	NaN	NaN	23.9211	NaN	NaN				17	34.4	14.4	87.767	535690000	21
tr|A0A1D6NKQ9|A0A1D6NKQ9_MAIZE Eukaryotic aspartyl protease family protein OS=Zea mays OX=4577 GN=103651531 PE=3 SV=1;tr|A0A1D6NKR2|A0A1D6NKR2_MAIZE Eukaryotic aspartyl protease family protein OS=Zea mays OX=4577 GN=103651531 PE=3 SV=1;tr|A0A1D6NKR1|A0A1D6	10.889	22.6	3	4	NaN	NaN	NaN	NaN	NaN	NaN	NaN	23.9232	23.8649	NaN	NaN	NaN	NaN	NaN	NaN	NaN				4	22.6	18.5	35.303	163230000	6
tr|A0A1D6NKY4|A0A1D6NKY4_MAIZE Rbcl rna s1-binding domain protein1 OS=Zea mays OX=4577 GN=ZEAMMB73_Zm00001d044328 PE=4 SV=1	7.4062	8.2	2	2	NaN	21.6566	NaN	NaN	NaN	NaN	NaN	NaN	NaN	NaN	NaN	NaN	NaN	NaN	NaN	NaN				2	8.2	8.2	45.379	22908000	6
tr|B6T2Y9|B6T2Y9_MAIZE Chlorophyll a-b binding protein, chloroplastic OS=Zea mays OX=4577 GN=100282054 PE=2 SV=1;tr|A0A1D6NLF1|A0A1D6NLF1_MAIZE Chlorophyll a-b binding protein, chloroplastic OS=Zea mays OX=4577 GN=103651575 PE=3 SV=1	8.7692	57.6	2	12	NaN	22.8274	NaN	NaN	NaN	NaN	22.7271	22.2675	25.3631	NaN	22.5649	24.8904	NaN	NaN	NaN	NaN	cellular macromolecule metabolic process;cellular metabolic process;cellular process;cellular protein metabolic process;generation of precursor metabolites and energy;macromolecule metabolic process;macromolecule modification;metabolic process;photosynthesis, light harvesting;primary metabolic process;protein metabolic process;protein modification process;protein-chromophore linkage	binding;cation binding;chlorophyll binding;ion binding;metal ion binding;tetrapyrrole binding	cell part;chloroplast;cytoplasmic part;integral to membrane;intracellular membrane-bounded organelle;intracellular organelle;intracellular part;intrinsic to membrane;macromolecular complex;membrane part;membrane-bounded organelle;organelle;photosystem;photosystem I;photosystem II;plastid;protein complex;thylakoid part	2	22	22	27.945	129170000	10
tr|A0A1D6NLS2|A0A1D6NLS2_MAIZE Putative inactive receptor kinase OS=Zea mays OX=4577 GN=ZEAMMB73_Zm00001d044434 PE=4 SV=1	19.387	21.7	7	10	NaN	22.8812	23.3022	NaN	23.5876	NaN	NaN	22.7718	NaN	24.5028	NaN	22.9595	NaN	NaN	NaN	NaN				10	21.7	15.4	71.66	354650000	26
tr|A0A1D6NLZ8|A0A1D6NLZ8_MAIZE Cytochrome c oxidase polypeptide Vb OS=Zea mays OX=4577 GN=103651601 PE=4 SV=1;tr|K7V763|K7V763_MAIZE Cytochrome c oxidase subunit 5b-2 mitochondrial OS=Zea mays OX=4577 GN=100277708 PE=4 SV=1;tr|B6SIM0|B6SIM0_MAIZE Cytochrom	45.337	34.6	2	2	22.7728	NaN	NaN	NaN	NaN	NaN	NaN	NaN	NaN	NaN	NaN	NaN	NaN	NaN	NaN	NaN		catalytic activity;cation transmembrane transporter activity;cytochrome-c oxidase activity;heme-copper terminal oxidase activity;hydrogen ion transmembrane transporter activity;inorganic cation transmembrane transporter activity;ion transmembrane transporter activity;monovalent inorganic cation transmembrane transporter activity;oxidoreductase activity;oxidoreductase activity, acting on a heme gr…	cell part;cytoplasmic part;envelope;intracellular organelle part;intracellular part;mitochondrial envelope;mitochondrial part;organelle envelope;organelle part	2	34.6	34.6	11.686	261060000	30
tr|A0A1D6NNF9|A0A1D6NNF9_MAIZE Pre-mRNA-processing protein 40A OS=Zea mays OX=4577 GN=103651641 PE=4 SV=1;tr|A0A1D6NNI1|A0A1D6NNI1_MAIZE Pre-mRNA-processing protein 40A OS=Zea mays OX=4577 GN=103651641 PE=4 SV=1;tr|A0A1D6NNI2|A0A1D6NNI2_MAIZE Pre-mRNA-proc	201.03	24.5	3	16	NaN	NaN	NaN	NaN	NaN	NaN	NaN	NaN	NaN	NaN	23.6975	NaN	23.4184	23.1157	NaN	NaN				16	24.5	5.7	102.3	241510000	43
tr|A0A1D6NNV9|A0A1D6NNV9_MAIZE Alpha/beta-Hydrolases superfamily protein OS=Zea mays OX=4577 GN=ZEAMMB73_Zm00001d044575 PE=4 SV=1	7.16	19.4	4	4	NaN	24.5811	NaN	NaN	NaN	NaN	NaN	NaN	NaN	NaN	NaN	NaN	NaN	NaN	24.2118	NaN				4	19.4	19.4	30.746	360000000	16
tr|C0PCQ6|C0PCQ6_MAIZE 40S ribosomal protein S2-1 OS=Zea mays OX=4577 GN=100383062 PE=2 SV=1	21.595	68.6	2	21	NaN	24.5355	NaN	25.1591	25.1529	24.1519	NaN	NaN	NaN	NaN	25.0741	NaN	NaN	NaN	26.5999	NaN	biosynthetic process;cellular biosynthetic process;cellular macromolecule biosynthetic process;cellular macromolecule metabolic process;cellular metabolic process;cellular process;cellular protein metabolic process;macromolecule biosynthetic process;macromolecule metabolic process;metabolic process;primary metabolic process;protein metabolic process;translation	binding;nucleic acid binding;RNA binding;structural constituent of ribosome;structural molecule activity	cell part;intracellular organelle part;intracellular part;macromolecular complex;organelle part;ribonucleoprotein complex;small ribosomal subunit	2	12.8	12.8	29.935	1191400000	46
tr|A0A1D6NQ33|A0A1D6NQ33_MAIZE Uncharacterized protein OS=Zea mays OX=4577 GN=ZEAMMB73_Zm00001d044621 PE=4 SV=1	13.073	19.2	4	4	NaN	23.244	NaN	NaN	NaN	NaN	NaN	NaN	23.0081	23.666	23.6902	NaN	23.7317	NaN	NaN	NaN				4	19.2	19.2	29.767	415820000	40
tr|A0A1D6NQJ3|A0A1D6NQJ3_MAIZE ENTH/VHS family protein OS=Zea mays OX=4577 GN=103651671 PE=4 SV=1;tr|A0A1D6NQJ4|A0A1D6NQJ4_MAIZE ENTH/VHS family protein OS=Zea mays OX=4577 GN=103651671 PE=4 SV=1	1.4041	10.6	2	2	NaN	NaN	NaN	NaN	NaN	NaN	NaN	NaN	NaN	NaN	NaN	NaN	NaN	NaN	NaN	21.0295				2	10.6	10.6	61.062	62772000	1
tr|A0A1D6NQP7|A0A1D6NQP7_MAIZE Chalcone-flavonone isomerase family protein OS=Zea mays OX=4577 GN=ZEAMMB73_Zm00001d044683 PE=3 SV=1	8.1293	12.6	2	2	NaN	NaN	NaN	NaN	NaN	NaN	NaN	NaN	NaN	NaN	NaN	NaN	NaN	NaN	23.7191	NaN				2	12.6	12.6	25.347	89886000	5
tr|B4FB54|B4FB54_MAIZE Non-specific lipid-transfer protein OS=Zea mays OX=4577 GN=100274469 PE=2 SV=1;tr|A0A1D6NQP9|A0A1D6NQP9_MAIZE Non-specific lipid-transfer protein OS=Zea mays OX=4577 GN=100274469 PE=3 SV=1	2.5882	21.1	2	2	NaN	NaN	NaN	NaN	NaN	NaN	NaN	NaN	NaN	NaN	NaN	23.0625	NaN	NaN	NaN	NaN	establishment of localization;lipid transport;organic substance transport;transport	binding;lipid binding		2	21.1	21.1	12.092	38056000	3
tr|A0A1D6NS96|A0A1D6NS96_MAIZE Acylaminoacyl-peptidase1 OS=Zea mays OX=4577 GN=ZEAMMB73_Zm00001d044916 PE=4 SV=1;tr|A0A1D6NS94|A0A1D6NS94_MAIZE Acylaminoacyl-peptidase1 OS=Zea mays OX=4577 GN=ZEAMMB73_Zm00001d044916 PE=4 SV=1;tr|A0A1D6NS97|A0A1D6NS97_MAIZE	53.209	37.8	2	19	NaN	NaN	NaN	NaN	NaN	NaN	NaN	NaN	NaN	NaN	NaN	NaN	25.3306	25.7715	NaN	NaN				19	37.8	6.4	87.82	268570000	3
tr|A0A1D6NUP6|A0A1D6NUP6_MAIZE Thiol protease SEN102 OS=Zea mays OX=4577 GN=ZEAMMB73_Zm00001d045221 PE=3 SV=1;tr|B7ZXQ3|B7ZXQ3_MAIZE Cysteine proteinases superfamily protein OS=Zea mays OX=4577 GN=ZEAMMB73_Zm00001d023973 PE=2 SV=1	11.009	8.7	1	2	NaN	NaN	NaN	22.6914	NaN	NaN	NaN	NaN	NaN	NaN	NaN	NaN	NaN	NaN	NaN	NaN		catalytic activity;cysteine-type peptidase activity;hydrolase activity;peptidase activity;peptidase activity, acting on L-amino acid peptides		2	8.7	3.9	39.076	7907000	0
tr|A0A1D6NV39|A0A1D6NV39_MAIZE ACS-like protein OS=Zea mays OX=4577 GN=ZEAMMB73_Zm00001d045295 PE=4 SV=1;tr|K7VAK5|K7VAK5_MAIZE ACS-like protein OS=Zea mays OX=4577 GN=ZEAMMB73_Zm00001d045295 PE=4 SV=1	102.92	39.1	23	23	NaN	23.7083	23.0998	NaN	23.2083	NaN	NaN	NaN	NaN	NaN	NaN	NaN	NaN	NaN	NaN	NaN		catalytic activity;ligase activity		23	39.1	39.1	75.075	3282900000	157
tr|A0A1D6NVT0|A0A1D6NVT0_MAIZE Zinc finger protein OS=Zea mays OX=4577 GN=ZEAMMB73_Zm00001d045394 PE=3 SV=1	8.5685	14.1	3	3	NaN	NaN	NaN	NaN	NaN	24.1989	NaN	NaN	NaN	NaN	NaN	NaN	NaN	NaN	NaN	NaN				3	14.1	14.1	42.918	109220000	21
tr|A0A1D6NVV0|A0A1D6NVV0_MAIZE 2-oxoglutarate (2OG) and Fe(II)-dependent oxygenase superfamily protein OS=Zea mays OX=4577 GN=ZEAMMB73_Zm00001d045417 PE=4 SV=1;tr|A0A1D6NVU8|A0A1D6NVU8_MAIZE 2-oxoglutarate (2OG) and Fe(II)-dependent oxygenase superfamily p	3.7626	16.3	2	2	NaN	NaN	NaN	NaN	NaN	NaN	NaN	22.7408	NaN	NaN	NaN	NaN	NaN	NaN	NaN	NaN				2	16.3	16.3	27.516	122520000	11
tr|A0A1D6NVZ7|A0A1D6NVZ7_MAIZE Transketolase 1 OS=Zea mays OX=4577 GN=ZEAMMB73_Zm00001d045451 PE=4 SV=1	323.31	81.1	1	70	NaN	NaN	NaN	NaN	NaN	NaN	NaN	NaN	NaN	NaN	NaN	NaN	NaN	NaN	NaN	24.7651				70	81.1	1.4	79.093	373130000	22
tr|C4JA36|C4JA36_MAIZE Binding partner of ACD11 1 OS=Zea mays OX=4577 GN=ZEAMMB73_Zm00001d045559 PE=2 SV=1;tr|A0A1D6NWZ6|A0A1D6NWZ6_MAIZE Binding partner of ACD11 1 OS=Zea mays OX=4577 GN=ZEAMMB73_Zm00001d045559 PE=4 SV=1	21.353	43.9	7	7	NaN	24.841	NaN	NaN	NaN	NaN	NaN	NaN	23.1182	23.9793	23.3203	25.5521	NaN	NaN	NaN	NaN		binding;nucleic acid binding;nucleotide binding		7	43.9	43.9	28.069	716520000	45
tr|A0A1D6NYP2|A0A1D6NYP2_MAIZE SMAD/FHA domain-containing protein OS=Zea mays OX=4577 GN=103638266 PE=4 SV=1;tr|A0A1D6NYP1|A0A1D6NYP1_MAIZE SMAD/FHA domain-containing protein OS=Zea mays OX=4577 GN=103638266 PE=4 SV=1;tr|A0A1D6NYP0|A0A1D6NYP0_MAIZE SMAD/FH	8.1842	12.9	6	6	NaN	NaN	NaN	NaN	NaN	NaN	24.2782	NaN	NaN	NaN	NaN	NaN	NaN	NaN	NaN	NaN				6	12.9	12.9	84.172	194520000	12
tr|A0A1D6NZN4|A0A1D6NZN4_MAIZE Carboxyl-terminal-processing peptidase 3 chloroplastic OS=Zea mays OX=4577 GN=ZEAMMB73_Zm00001d045885 PE=4 SV=1;tr|A0A1D6NZN5|A0A1D6NZN5_MAIZE Carboxyl-terminal-processing peptidase 3 chloroplastic OS=Zea mays OX=4577 GN=ZEAM	3.3698	10.8	2	2	NaN	NaN	NaN	NaN	NaN	NaN	NaN	NaN	23.551	NaN	NaN	NaN	NaN	NaN	NaN	NaN				2	10.8	10.8	50.735	25992000	1
tr|A0A1D6NZR8|A0A1D6NZR8_MAIZE UPF0061 protein azo1574 OS=Zea mays OX=4577 GN=ZEAMMB73_Zm00001d045897 PE=3 SV=1;tr|A0A1D6NZR6|A0A1D6NZR6_MAIZE UPF0061 protein azo1574 OS=Zea mays OX=4577 GN=ZEAMMB73_Zm00001d045897 PE=4 SV=1;tr|A0A1D6NZR7|A0A1D6NZR7_MAIZE U	8.1419	9.6	4	4	NaN	NaN	24.2609	NaN	24.1482	NaN	NaN	NaN	NaN	NaN	NaN	NaN	NaN	NaN	NaN	NaN				4	9.6	9.6	71.509	179810000	14
tr|A0A1D6P1C9|A0A1D6P1C9_MAIZE ATP/GTP-binding protein family OS=Zea mays OX=4577 GN=ZEAMMB73_Zm00001d046221 PE=4 SV=1;tr|A0A1D6P1E1|A0A1D6P1E1_MAIZE ATP/GTP-binding protein family OS=Zea mays OX=4577 GN=ZEAMMB73_Zm00001d046221 PE=4 SV=1;tr|A0A1D6P1E3|A0A1	40.12	19.6	16	17	NaN	NaN	NaN	NaN	NaN	NaN	24.4435	NaN	NaN	NaN	NaN	22.4053	NaN	NaN	NaN	NaN				16	18.9	18.9	154.1	510600000	46
tr|K7VAT7|K7VAT7_MAIZE Protein kinase superfamily protein with octicosapeptide/Phox/Bem1p domain OS=Zea mays OX=4577 GN=ZEAMMB73_Zm00001d046569 PE=4 SV=1;tr|A0A1D6P3G6|A0A1D6P3G6_MAIZE Protein kinase superfamily protein with octicosapeptide/Phox/Bem1p doma	78.804	11.3	7	7	NaN	NaN	NaN	NaN	NaN	NaN	NaN	NaN	23.3795	NaN	23.7369	23.1568	23.2462	22.8049	22.9021	NaN		adenyl nucleotide binding;adenyl ribonucleotide binding;ATP binding;binding;catalytic activity;kinase activity;nucleotide binding;phosphotransferase activity, alcohol group as acceptor;protein kinase activity;purine nucleotide binding;purine ribonucleoside triphosphate binding;purine ribonucleotide binding;ribonucleotide binding;transferase activity;transferase activity, transferring phosphorus-c…		7	11.3	11.3	119.46	521100000	59
tr|A0A1D6P4W5|A0A1D6P4W5_MAIZE Uncharacterized protein OS=Zea mays OX=4577 GN=ZEAMMB73_Zm00001d046766 PE=4 SV=1;tr|A0A1D6P4W3|A0A1D6P4W3_MAIZE Uncharacterized protein OS=Zea mays OX=4577 GN=ZEAMMB73_Zm00001d046766 PE=4 SV=1;tr|A0A1D6P4W1|A0A1D6P4W1_MAIZE U	1.8236	10.6	2	7	NaN	NaN	NaN	NaN	NaN	NaN	NaN	23.938	NaN	NaN	NaN	NaN	NaN	NaN	NaN	NaN				2	3.5	3.5	91.357	37921000	2
tr|K7VXY4|K7VXY4_MAIZE Putative metacaspase family protein OS=Zea mays OX=4577 GN=ZEAMMB73_Zm00001d047078 PE=4 SV=1;tr|A0A1D6P6U5|A0A1D6P6U5_MAIZE Putative metacaspase family protein OS=Zea mays OX=4577 GN=ZEAMMB73_Zm00001d047078 PE=4 SV=1;tr|A0A1D6P6U4|A0	3.6628	13.4	3	3	NaN	NaN	NaN	NaN	NaN	NaN	NaN	NaN	NaN	NaN	NaN	NaN	22.9164	22.8824	NaN	NaN		catalytic activity;cysteine-type endopeptidase activity;cysteine-type peptidase activity;endopeptidase activity;hydrolase activity;peptidase activity;peptidase activity, acting on L-amino acid peptides		3	13.4	13.4	38.007	178030000	4
tr|A0A1D6P9J3|A0A1D6P9J3_MAIZE Glutathione peroxidase OS=Zea mays OX=4577 GN=100283257 PE=3 SV=1;tr|B6T5N2|B6T5N2_MAIZE Glutathione peroxidase OS=Zea mays OX=4577 GN=100283257 PE=2 SV=1	3.1377	22.4	2	2	NaN	NaN	NaN	NaN	NaN	NaN	NaN	NaN	NaN	NaN	NaN	23.6877	NaN	NaN	NaN	NaN	response to chemical stimulus;response to oxidative stress;response to stimulus;response to stress	antioxidant activity;catalytic activity;glutathione peroxidase activity;oxidoreductase activity;oxidoreductase activity, acting on peroxide as acceptor;peroxidase activity		2	22.4	22.4	13.259	43939000	2
tr|A0A1D6P9W2|A0A1D6P9W2_MAIZE Villin-2 OS=Zea mays OX=4577 GN=103639123 PE=4 SV=1;tr|A0A1D6P9W3|A0A1D6P9W3_MAIZE Villin-2 OS=Zea mays OX=4577 GN=103639123 PE=4 SV=1;tr|A0A1D6P9W0|A0A1D6P9W0_MAIZE Villin-2 OS=Zea mays OX=4577 GN=103639123 PE=4 SV=1;tr|A0A1	2.7331	13.3	1	10	NaN	NaN	NaN	NaN	NaN	NaN	NaN	NaN	NaN	NaN	NaN	NaN	NaN	20.8092	NaN	NaN				2	4.7	2.6	103.23	8765300	1
tr|K7WDF1|K7WDF1_MAIZE Alpha-N-acetylglucosaminidase OS=Zea mays OX=4577 GN=ZEAMMB73_Zm00001d047455 PE=4 SV=1;tr|A0A1D6P9X8|A0A1D6P9X8_MAIZE Alpha-N-acetylglucosaminidase OS=Zea mays OX=4577 GN=ZEAMMB73_Zm00001d047455 PE=4 SV=1;tr|A0A1D6P9Y1|A0A1D6P9Y1_MAI	6.0176	6	4	4	NaN	23.7949	NaN	NaN	NaN	NaN	NaN	23.3448	NaN	NaN	NaN	NaN	NaN	NaN	NaN	NaN			cell part;cytoplasmic part;intracellular membrane-bounded organelle;intracellular organelle;intracellular part;membrane-bounded organelle;organelle;vacuole	4	6	6	92.2	207160000	11
tr|A0A1D6PA21|A0A1D6PA21_MAIZE Beta-adaptin-like protein OS=Zea mays OX=4577 GN=103639126 PE=3 SV=1;tr|K7WDG3|K7WDG3_MAIZE Beta-adaptin-like protein OS=Zea mays OX=4577 GN=103639126 PE=3 SV=1;tr|A0A1D6PA27|A0A1D6PA27_MAIZE Beta-adaptin-like protein OS=Zea	125.73	22.7	4	14	NaN	23.1684	23.8627	NaN	NaN	NaN	NaN	NaN	23.4706	23.5801	23.4871	23.0166	23.8066	NaN	NaN	NaN	cellular process;establishment of localization;establishment of localization in cell;establishment of protein localization;intracellular protein transport;intracellular transport;protein transport;transport;vesicle-mediated transport	protein transporter activity;substrate-specific transporter activity;transporter activity	AP-type membrane coat adaptor complex;cell part;clathrin adaptor complex;cytoplasmic part;intracellular part;macromolecular complex;membrane part;protein complex	14	22.7	6.3	99.163	577240000	44
tr|A0A1D6PC82|A0A1D6PC82_MAIZE Argininosuccinate lyase chloroplastic OS=Zea mays OX=4577 GN=100191977 PE=4 SV=1;tr|A0A1D6PC83|A0A1D6PC83_MAIZE Argininosuccinate lyase chloroplastic OS=Zea mays OX=4577 GN=100191977 PE=3 SV=1;tr|B4FAV4|B4FAV4_MAIZE Argininos	48.925	31	5	5	NaN	NaN	NaN	NaN	NaN	NaN	NaN	NaN	22.4203	NaN	NaN	NaN	NaN	NaN	NaN	NaN	amine biosynthetic process;amine metabolic process;arginine biosynthetic process;arginine biosynthetic process via ornithine;arginine metabolic process;biosynthetic process;carboxylic acid biosynthetic process;carboxylic acid metabolic process;cellular amine metabolic process;cellular amino acid biosynthetic process;cellular amino acid metabolic process;cellular biosynthetic process;cellular keto…	amidine-lyase activity;argininosuccinate lyase activity;carbon-nitrogen lyase activity;catalytic activity;lyase activity	cell part;chloroplast part;chloroplast stroma;cytoplasmic part;intracellular organelle part;intracellular part;organelle part;plastid part;plastid stroma	5	31	31	29.778	169480000	16
tr|A0A1D6PD99|A0A1D6PD99_MAIZE Glutathione S-transferase L2 chloroplastic OS=Zea mays OX=4577 GN=ZEAMMB73_Zm00001d047765 PE=4 SV=1;tr|A0A1D6JYM4|A0A1D6JYM4_MAIZE Glutathione S-transferase L2 chloroplastic OS=Zea mays OX=4577 GN=ZEAMMB73_Zm00001d028692 PE=3	3.6449	14.2	3	3	NaN	NaN	NaN	NaN	NaN	NaN	NaN	NaN	NaN	NaN	NaN	NaN	23.6856	NaN	NaN	NaN				3	14.2	14.2	31.697	72068000	3
tr|A0A1D6PDH9|A0A1D6PDH9_MAIZE UDP-glucuronic acid decarboxylase 5 OS=Zea mays OX=4577 GN=100193447 PE=4 SV=1;tr|B4FF24|B4FF24_MAIZE UDP-glucuronic acid decarboxylase 5 OS=Zea mays OX=4577 GN=100193447 PE=2 SV=1;tr|A0A1D6PDI7|A0A1D6PDI7_MAIZE UDP-glucuroni	7.1206	48.7	3	13	NaN	NaN	NaN	NaN	NaN	NaN	NaN	NaN	23.7888	NaN	NaN	NaN	NaN	NaN	NaN	NaN		binding;catalytic activity;coenzyme binding;cofactor binding		3	13.8	13.8	38.969	279140000	11
tr|A0A1D6PEM3|A0A1D6PEM3_MAIZE Protein TOPLESS OS=Zea mays OX=4577 GN=ZEAMMB73_Zm00001d047897 PE=4 SV=1;tr|A0A1D6PEM6|A0A1D6PEM6_MAIZE Protein TOPLESS OS=Zea mays OX=4577 GN=ZEAMMB73_Zm00001d047897 PE=4 SV=1;tr|A0A1D6PEK2|A0A1D6PEK2_MAIZE Protein TOPLESS O	53.079	26.1	4	19	NaN	NaN	NaN	NaN	NaN	NaN	NaN	23.171	NaN	NaN	NaN	NaN	NaN	NaN	NaN	NaN				4	8.7	8.7	120.21	292040000	39
tr|A0A1D6PGX0|A0A1D6PGX0_MAIZE Methionine--tRNA ligase cytoplasmic OS=Zea mays OX=4577 GN=103639438 PE=3 SV=1;tr|A0A1D6PGW8|A0A1D6PGW8_MAIZE Methionine--tRNA ligase cytoplasmic OS=Zea mays OX=4577 GN=103639438 PE=3 SV=1;tr|A0A1D6PGW6|A0A1D6PGW6_MAIZE Methi	7.1445	36.1	3	20	NaN	NaN	NaN	NaN	NaN	NaN	NaN	NaN	NaN	NaN	23.789	NaN	23.561	23.7916	NaN	NaN	amine metabolic process;amino acid activation;carboxylic acid metabolic process;cellular amine metabolic process;cellular amino acid metabolic process;cellular ketone metabolic process;cellular macromolecule metabolic process;cellular metabolic process;cellular nitrogen compound metabolic process;cellular process;macromolecule metabolic process;metabolic process;methionyl-tRNA aminoacylation;ncRN…	adenyl nucleotide binding;adenyl ribonucleotide binding;aminoacyl-tRNA ligase activity;ATP binding;binding;catalytic activity;ligase activity;ligase activity, forming aminoacyl-tRNA and related compounds;ligase activity, forming carbon-oxygen bonds;methionine-tRNA ligase activity;nucleic acid binding;nucleotide binding;purine nucleotide binding;purine ribonucleoside triphosphate binding;purine ri…	cell part;cytoplasm;intracellular part	3	7.2	7.2	81.011	258360000	18
tr|A0A1D6PH52|A0A1D6PH52_MAIZE ATP synthase subunit gamma OS=Zea mays OX=4577 GN=100274172 PE=3 SV=1;tr|K7WFV1|K7WFV1_MAIZE ATP synthase subunit gamma OS=Zea mays OX=4577 GN=100274172 PE=3 SV=1;tr|A0A1D6PH56|A0A1D6PH56_MAIZE ATP synthase subunit gamma OS=Z	287.22	45	4	9	23.988	24.1167	24.1738	NaN	NaN	23.8351	NaN	NaN	23.8708	NaN	NaN	24.0178	NaN	NaN	NaN	NaN	ATP biosynthetic process;ATP metabolic process;ATP synthesis coupled proton transport;biosynthetic process;cation transport;cellular biosynthetic process;cellular metabolic process;cellular nitrogen compound biosynthetic process;cellular nitrogen compound metabolic process;cellular process;energy coupled proton transport, down electrochemical gradient;establishment of localization;heterocycle bio…	active transmembrane transporter activity;ATPase activity;ATPase activity, coupled;ATPase activity, coupled to movement of substances;ATPase activity, coupled to transmembrane movement of ions;ATPase activity, coupled to transmembrane movement of substances;catalytic activity;cation transmembrane transporter activity;cation-transporting ATPase activity;hydrogen ion transmembrane transporter activ…	cell part;intracellular part;macromolecular complex;membrane part;protein complex;proton-transporting ATP synthase complex, catalytic core F(1);proton-transporting two-sector ATPase complex, catalytic domain	9	45	22.1	31.492	404250000	23
tr|B4FQP6|B4FQP6_MAIZE Mannose-1-phosphate guanylyltransferase 1 OS=Zea mays OX=4577 GN=100191571 PE=2 SV=1;tr|A0A1D6PHU2|A0A1D6PHU2_MAIZE Mannose-1-phosphate guanylyltransferase 1 OS=Zea mays OX=4577 GN=100191571 PE=4 SV=1;tr|A0A1D6PHU3|A0A1D6PHU3_MAIZE M	19.644	25.3	3	9	NaN	NaN	NaN	NaN	NaN	NaN	NaN	NaN	NaN	NaN	NaN	NaN	NaN	23.1139	NaN	NaN	biosynthetic process;metabolic process	catalytic activity;nucleotidyltransferase activity;transferase activity;transferase activity, transferring phosphorus-containing groups		9	25.3	8.7	45.683	96981000	4
tr|A0A1D6PKM3|A0A1D6PKM3_MAIZE Alba DNA/RNA-binding protein OS=Zea mays OX=4577 GN=ZEAMMB73_Zm00001d048445 PE=4 SV=1;tr|A0A1D6PKL9|A0A1D6PKL9_MAIZE Alba DNA/RNA-binding protein OS=Zea mays OX=4577 GN=ZEAMMB73_Zm00001d048445 PE=4 SV=1;tr|A0A1D6PKM0|A0A1D6PK	89.927	21.9	4	4	NaN	NaN	NaN	NaN	NaN	NaN	NaN	NaN	NaN	NaN	NaN	NaN	23.6668	NaN	23.0322	NaN				4	21.9	21.9	30.15	352300000	42
tr|A0A1D6PM82|A0A1D6PM82_MAIZE p-loop containing nucleoside triphosphate hydrolase superfamily protein OS=Zea mays OX=4577 GN=100383156 PE=4 SV=1;tr|A0A1D6PM83|A0A1D6PM83_MAIZE p-loop containing nucleoside triphosphate hydrolase superfamily protein OS=Zea	5.9985	9.6	3	3	NaN	NaN	NaN	NaN	NaN	NaN	NaN	NaN	22.5241	NaN	NaN	NaN	NaN	NaN	NaN	NaN				3	9.6	9.6	45.531	119900000	22
tr|K7TUK0|K7TUK0_MAIZE U2 snRNP auxiliary factor large subunit OS=Zea mays OX=4577 GN=100286059 PE=3 SV=1;tr|A0A1D6PQ04|A0A1D6PQ04_MAIZE U2 snRNP auxiliary factor large subunit OS=Zea mays OX=4577 GN=100286059 PE=3 SV=1;tr|C0P852|C0P852_MAIZE U2 snRNP auxi	11.771	29.7	5	10	NaN	NaN	NaN	23.9354	NaN	NaN	NaN	NaN	NaN	NaN	NaN	NaN	NaN	NaN	NaN	NaN	cellular macromolecule metabolic process;cellular metabolic process;cellular nitrogen compound metabolic process;cellular process;macromolecule metabolic process;metabolic process;mRNA metabolic process;mRNA processing;nitrogen compound metabolic process;nucleic acid metabolic process;nucleobase-containing compound metabolic process;primary metabolic process;RNA metabolic process;RNA processing	binding;nucleic acid binding;nucleotide binding;RNA binding	cell part;intracellular membrane-bounded organelle;intracellular organelle;intracellular part;membrane-bounded organelle;nucleus;organelle	5	19.5	19.5	61.009	251360000	15
tr|A0A1D6PTR2|A0A1D6PTR2_MAIZE HSP20-like chaperones superfamily protein OS=Zea mays OX=4577 GN=ZEAMMB73_Zm00001d049305 PE=4 SV=1;tr|A0A1D6PTR0|A0A1D6PTR0_MAIZE HSP20-like chaperones superfamily protein OS=Zea mays OX=4577 GN=ZEAMMB73_Zm00001d049305 PE=4 S	6.43	45.7	2	11	NaN	NaN	NaN	NaN	NaN	NaN	NaN	NaN	NaN	NaN	NaN	22.6334	NaN	NaN	NaN	NaN				2	17.8	17.8	22.497	27072000	11
tr|A0A1D6PU20|A0A1D6PU20_MAIZE Methionine aminopeptidase OS=Zea mays OX=4577 GN=ZEAMMB73_Zm00001d049365 PE=3 SV=1	4.5011	16.3	3	3	NaN	NaN	NaN	NaN	NaN	NaN	NaN	NaN	NaN	23.2216	NaN	NaN	NaN	NaN	NaN	NaN				3	16.3	16.3	34.534	28494000	5
tr|K7TWH5|K7TWH5_MAIZE Putative aminotransferase class III superfamily protein OS=Zea mays OX=4577 GN=ZEAMMB73_Zm00001d049380 PE=3 SV=1;tr|A0A1D6PUB3|A0A1D6PUB3_MAIZE Putative aminotransferase class III superfamily protein OS=Zea mays OX=4577 GN=ZEAMMB73_Z	8.8504	14.7	3	4	24.0223	NaN	24.2683	NaN	NaN	NaN	NaN	NaN	NaN	NaN	NaN	NaN	NaN	NaN	NaN	NaN		binding;catalytic activity;cofactor binding;pyridoxal phosphate binding;transaminase activity;transferase activity;transferase activity, transferring nitrogenous groups;vitamin B6 binding;vitamin binding		3	10.3	10.3	39.655	361880000	12
tr|A0A1D6PWW9|A0A1D6PWW9_MAIZE AT-hook motif nuclear-localized protein 1 OS=Zea mays OX=4577 GN=100272943 PE=4 SV=1;tr|B4FRV0|B4FRV0_MAIZE AT-hook motif nuclear-localized protein 1 OS=Zea mays OX=4577 GN=100272943 PE=2 SV=1	22.504	27.5	3	4	NaN	NaN	NaN	NaN	NaN	NaN	23.1512	NaN	NaN	NaN	NaN	NaN	NaN	NaN	NaN	NaN		binding;DNA binding;nucleic acid binding		3	23	23	22.533	267420000	26
tr|B4FS65|B4FS65_MAIZE Cysteine proteinases superfamily protein OS=Zea mays OX=4577 GN=ZEAMMB73_Zm00001d005391 PE=2 SV=1	183.8	49.5	17	17	25.0846	24.5653	24.5382	24.5117	26.7037	25.614	27.7971	27.1062	25.5537	22.5354	25.2061	25.7966	26.7192	26.8332	24.2907	NaN		catalytic activity;cysteine-type peptidase activity;hydrolase activity;peptidase activity;peptidase activity, acting on L-amino acid peptides		17	49.5	49.5	39.955	4967600000	180
tr|A0A1D6PZ20|A0A1D6PZ20_MAIZE Protein-L-isoaspartate O-methyltransferase OS=Zea mays OX=4577 GN=ZEAMMB73_Zm00001d049966 PE=4 SV=1	3.2229	31.4	2	2	22.5263	22.5729	22.533	NaN	NaN	NaN	22.8193	NaN	NaN	23.4751	24.3872	22.6839	NaN	NaN	NaN	NaN				2	31.4	31.4	9.3085	187770000	8
tr|B4G0V7|B4G0V7_MAIZE Alpha carbonic anhydrase 7 OS=Zea mays OX=4577 GN=100280638 PE=2 SV=1;tr|A0A1D6PZB8|A0A1D6PZB8_MAIZE Alpha carbonic anhydrase 7 OS=Zea mays OX=4577 GN=100280638 PE=4 SV=1;tr|A0A1D6PZC0|A0A1D6PZC0_MAIZE Alpha carbonic anhydrase 7 OS=Z	20.139	36.5	7	8	NaN	NaN	NaN	NaN	NaN	NaN	23.507	NaN	NaN	NaN	NaN	NaN	NaN	NaN	NaN	NaN				8	36.5	33.9	31.236	714140000	38
tr|C0P848|C0P848_MAIZE Formate dehydrogenase, mitochondrial OS=Zea mays OX=4577 GN=103638381 PE=2 SV=1;tr|A0A1D6P089|A0A1D6P089_MAIZE Formate dehydrogenase chloroplastic/mitochondrial OS=Zea mays OX=4577 GN=103638381 PE=4 SV=1;tr|A0A1D6P090|A0A1D6P090_MAIZ	186.01	73.1	10	26	24.123	24.7706	23.0843	23.3457	24.4193	23.2031	24.2554	24.0257	22.5729	NaN	22.9112	NaN	NaN	24.2304	25.1604	23.2853		binding;catalytic activity;coenzyme binding;cofactor binding;NAD binding;nucleotide binding;oxidoreductase activity;oxidoreductase activity, acting on CH-OH group of donors;oxidoreductase activity, acting on the CH-OH group of donors, NAD or NADP as acceptor		26	73.1	42.6	41.434	6975200000	191
tr|A0A1D6Q3W7|A0A1D6Q3W7_MAIZE Protein kinase superfamily protein OS=Zea mays OX=4577 GN=100304212 PE=4 SV=1;tr|K7U1D6|K7U1D6_MAIZE Protein kinase superfamily protein OS=Zea mays OX=4577 GN=100304212 PE=4 SV=1;tr|A0A1D6Q3X3|A0A1D6Q3X3_MAIZE Protein kinase	3.3886	6.1	3	3	NaN	NaN	NaN	NaN	NaN	NaN	NaN	NaN	NaN	22.0622	21.5032	NaN	21.9033	22.0473	NaN	NaN		adenyl nucleotide binding;adenyl ribonucleotide binding;ATP binding;binding;catalytic activity;kinase activity;nucleotide binding;phosphotransferase activity, alcohol group as acceptor;protein kinase activity;purine nucleotide binding;purine ribonucleoside triphosphate binding;purine ribonucleotide binding;ribonucleotide binding;transferase activity;transferase activity, transferring phosphorus-c…		3	6.1	6.1	67.469	81676000	8
tr|A0A1D6Q461|A0A1D6Q461_MAIZE Isocitrate dehydrogenase [NAD] regulatory subunit 3 mitochondrial OS=Zea mays OX=4577 GN=ZEAMMB73_Zm00001d050965 PE=4 SV=1	46.274	34.6	2	7	NaN	23.4524	24.3088	NaN	NaN	NaN	NaN	NaN	23.6161	NaN	NaN	NaN	NaN	NaN	NaN	NaN				2	9.5	9.5	22.949	134240000	17
tr|A0A1D6Q6Z8|A0A1D6Q6Z8_MAIZE RNA-metabolising metallo-beta-lactamase family protein OS=Zea mays OX=4577 GN=ZEAMMB73_Zm00001d051455 PE=4 SV=1	6.0544	24	2	6	NaN	NaN	NaN	NaN	NaN	NaN	NaN	23.3823	NaN	23.3412	NaN	NaN	NaN	NaN	NaN	NaN				2	8.4	8.4	40.304	45929000	6
tr|A0A1D6Q835|A0A1D6Q835_MAIZE Alpha/beta-Hydrolases superfamily protein OS=Zea mays OX=4577 GN=ZEAMMB73_Zm00001d051567 PE=4 SV=1	37.962	11.4	2	2	NaN	25.6305	24.5968	NaN	NaN	NaN	NaN	NaN	24.3578	24.9092	NaN	NaN	23.9793	NaN	NaN	24.2332				2	11.4	11.4	42.883	227980000	18
tr|A0A1D6Q8N0|A0A1D6Q8N0_MAIZE Tola protein homolog1 OS=Zea mays OX=4577 GN=103653997 PE=4 SV=1;tr|A0A1D6Q8Q4|A0A1D6Q8Q4_MAIZE Tola protein homolog1 OS=Zea mays OX=4577 GN=103653997 PE=4 SV=1;tr|A0A1D6Q8M7|A0A1D6Q8M7_MAIZE Tola protein homolog1 OS=Zea mays	9.7606	14.2	5	13	NaN	NaN	NaN	NaN	NaN	NaN	NaN	NaN	NaN	NaN	NaN	NaN	22.7368	NaN	NaN	NaN				5	6.1	6.1	141.9	146220000	18
tr|A0A1D6Q999|A0A1D6Q999_MAIZE WD40, G-beta domain containing family protein, family OS=Zea mays OX=4577 GN=103654004 PE=4 SV=1;tr|A0A1D6Q996|A0A1D6Q996_MAIZE WD40, G-beta domain containing family protein, family OS=Zea mays OX=4577 GN=103654004 PE=4 SV=1;	155.51	30.7	10	28	NaN	NaN	NaN	23.4347	NaN	NaN	NaN	NaN	NaN	NaN	23.4885	NaN	NaN	NaN	NaN	NaN				10	14.7	14.7	130.6	393160000	38
tr|A0A1D6QA36|A0A1D6QA36_MAIZE Zn-dependent hydrolase, including glyoxylase OS=Zea mays OX=4577 GN=ZEAMMB73_Zm00001d051842 PE=4 SV=1;tr|A0A1D6QA37|A0A1D6QA37_MAIZE Zn-dependent hydrolase, including glyoxylase OS=Zea mays OX=4577 GN=ZEAMMB73_Zm00001d051842	2.4716	6.4	2	2	NaN	NaN	NaN	NaN	NaN	NaN	NaN	NaN	NaN	NaN	NaN	NaN	NaN	NaN	NaN	22.067				2	6.4	6.4	26.25	27563000	12
tr|C0PKL8|C0PKL8_MAIZE Galactose oxidase/kelch repeat superfamily protein OS=Zea mays OX=4577 GN=100277414 PE=2 SV=1;tr|A0A1D6QAL2|A0A1D6QAL2_MAIZE Galactose oxidase/kelch repeat superfamily protein OS=Zea mays OX=4577 GN=100277414 PE=4 SV=1;tr|K7UZS2|K7UZ	20.806	23.4	9	9	23.5536	23.0466	NaN	23.2867	NaN	NaN	NaN	22.8807	NaN	NaN	NaN	NaN	NaN	NaN	NaN	NaN	establishment of localization;lipid transport;organic substance transport;transport		cell part;cytoplasmic part;cytosol;intracellular membrane-bounded organelle;intracellular organelle;intracellular part;membrane-bounded organelle;nucleus;organelle	9	23.4	23.4	53.734	404700000	35
tr|A0A1D6QBW2|A0A1D6QBW2_MAIZE Chaperone protein dnaJ OS=Zea mays OX=4577 GN=ZEAMMB73_Zm00001d052001 PE=3 SV=1;tr|K7U1A5|K7U1A5_MAIZE Chaperone protein dnaJ OS=Zea mays OX=4577 GN=ZEAMMB73_Zm00001d052001 PE=3 SV=1;tr|A0A1D6QBV6|A0A1D6QBV6_MAIZE Chaperone p	5.2179	17.9	3	6	NaN	NaN	NaN	NaN	NaN	NaN	NaN	NaN	21.7998	NaN	NaN	NaN	NaN	NaN	NaN	NaN	cellular macromolecule metabolic process;cellular metabolic process;cellular process;cellular protein metabolic process;macromolecule metabolic process;metabolic process;primary metabolic process;protein folding;protein metabolic process;response to abiotic stimulus;response to heat;response to stimulus;response to stress;response to temperature stimulus	adenyl nucleotide binding;adenyl ribonucleotide binding;ATP binding;binding;cation binding;ion binding;metal ion binding;nucleotide binding;purine nucleotide binding;purine ribonucleoside triphosphate binding;purine ribonucleotide binding;ribonucleotide binding		3	6.8	6.8	51.952	54210000	5
tr|A0A1D6QD43|A0A1D6QD43_MAIZE Lysine-ketoglutarate reductase/saccharopine dehydrogenase1 OS=Zea mays OX=4577 GN=541648 PE=4 SV=1;tr|A0A1D6QD07|A0A1D6QD07_MAIZE Lysine-ketoglutarate reductase/saccharopine dehydrogenase1 OS=Zea mays OX=4577 GN=541648 PE=4 S	17.132	13.3	4	10	NaN	NaN	NaN	NaN	NaN	NaN	NaN	23.7164	NaN	NaN	NaN	NaN	NaN	NaN	NaN	NaN		catalytic activity;oxidoreductase activity		10	13.3	5.4	105.9	310730000	6
tr|A0A1D6QEM1|A0A1D6QEM1_MAIZE DCD (Development and Cell Death) domain protein OS=Zea mays OX=4577 GN=ZEAMMB73_Zm00001d052259 PE=4 SV=1	10.447	24.2	3	7	23.7523	NaN	NaN	NaN	NaN	NaN	NaN	NaN	NaN	NaN	NaN	NaN	23.5451	24.224	NaN	23.4869				6	22.4	15.1	54.543	344150000	18
tr|A0A1D6QHI5|A0A1D6QHI5_MAIZE AMP-binding protein OS=Zea mays OX=4577 GN=100281546 PE=4 SV=1;tr|A0A1D6QHI2|A0A1D6QHI2_MAIZE AMP-binding protein OS=Zea mays OX=4577 GN=100281546 PE=4 SV=1;tr|A0A1D6QHH7|A0A1D6QHH7_MAIZE AMP-binding protein OS=Zea mays OX=45	5.7146	15.6	3	3	NaN	NaN	NaN	NaN	NaN	NaN	NaN	NaN	NaN	23.7024	NaN	NaN	NaN	NaN	NaN	NaN		catalytic activity		3	15.6	15.6	40.087	40255000	3
tr|A0A1D6QHM6|A0A1D6QHM6_MAIZE Putative 2-carboxy-D-arabinitol-1-phosphatase OS=Zea mays OX=4577 GN=ZEAMMB73_Zm00001d052519 PE=4 SV=1;tr|A0A1D6QHM7|A0A1D6QHM7_MAIZE Putative 2-carboxy-D-arabinitol-1-phosphatase OS=Zea mays OX=4577 GN=ZEAMMB73_Zm00001d05251	21.892	16	5	5	NaN	22.078	22.2611	NaN	NaN	NaN	NaN	NaN	NaN	23.6417	NaN	22.2603	NaN	NaN	NaN	NaN				5	16	16	42.79	97410000	10
tr|A0A1D6QL43|A0A1D6QL43_MAIZE H/ACA ribonucleoprotein complex subunit OS=Zea mays OX=4577 GN=ZEAMMB73_Zm00001d052952 PE=3 SV=1	5.0674	19.9	2	3	NaN	NaN	NaN	NaN	NaN	NaN	NaN	NaN	NaN	NaN	NaN	NaN	NaN	NaN	NaN	23.443				3	19.9	10.7	20.296	108200000	3
tr|A0A1D6QMU5|A0A1D6QMU5_MAIZE L-ascorbate peroxidase 3 peroxisomal OS=Zea mays OX=4577 GN=ZEAMMB73_Zm00001d053223 PE=3 SV=1	3.8094	18.1	3	4	NaN	NaN	NaN	NaN	NaN	NaN	NaN	NaN	23.9021	NaN	NaN	25.2945	NaN	NaN	NaN	NaN				3	18.1	18.1	30.396	85308000	6
tr|A0A1D6QQG4|A0A1D6QQG4_MAIZE Protein CLP1-like protein OS=Zea mays OX=4577 GN=100284798 PE=3 SV=1;tr|K7UQV5|K7UQV5_MAIZE Protein CLP1 homolog OS=Zea mays OX=4577 GN=100284798 PE=3 SV=1	5.1209	12.9	2	2	NaN	NaN	NaN	NaN	NaN	NaN	NaN	NaN	NaN	21.787	NaN	NaN	NaN	NaN	NaN	NaN	cellular macromolecule metabolic process;cellular metabolic process;cellular nitrogen compound metabolic process;cellular process;macromolecule metabolic process;metabolic process;mRNA 3'-end processing;mRNA metabolic process;mRNA processing;nitrogen compound metabolic process;nucleic acid metabolic process;nucleobase-containing compound metabolic process;primary metabolic process;RNA 3'-end proc…	adenyl nucleotide binding;adenyl ribonucleotide binding;ATP binding;binding;nucleotide binding;purine nucleotide binding;purine ribonucleoside triphosphate binding;purine ribonucleotide binding;ribonucleotide binding	cell part;intracellular organelle part;intracellular part;macromolecular complex;mRNA cleavage factor complex;nuclear part;nucleoplasm part;organelle part;protein complex	2	12.9	12.9	29.854	71150000	15
tr|A0A1D6QRT3|A0A1D6QRT3_MAIZE RNA-metabolising metallo-beta-lactamase family protein OS=Zea mays OX=4577 GN=ZEAMMB73_Zm00001d053718 PE=4 SV=1;tr|A0A1D6QRT5|A0A1D6QRT5_MAIZE RNA-metabolising metallo-beta-lactamase family protein OS=Zea mays OX=4577 GN=ZEAM	2.7604	11.7	2	6	NaN	NaN	NaN	NaN	NaN	NaN	NaN	23.5236	NaN	NaN	NaN	NaN	NaN	NaN	NaN	NaN		binding;catalytic activity;cation binding;endonuclease activity;hydrolase activity;hydrolase activity, acting on ester bonds;ion binding;metal ion binding;nuclease activity;nucleic acid binding;RNA binding		3	5.5	3.5	76.87	59164000	3
tr|K7UPI1|K7UPI1_MAIZE Dirigent protein OS=Zea mays OX=4577 GN=103652771 PE=3 SV=1	103.42	31.6	5	5	24.7249	NaN	NaN	NaN	NaN	23.4311	23.3941	NaN	NaN	NaN	22.5897	NaN	NaN	24.0695	NaN	NaN				5	31.6	31.6	20.175	528610000	24
tr|A0A1D6QTN8|A0A1D6QTN8_MAIZE Putative phosphoinositide phosphatase SAC9 OS=Zea mays OX=4577 GN=100273993 PE=4 SV=1;tr|K7UC02|K7UC02_MAIZE Putative phosphoinositide phosphatase SAC9 OS=Zea mays OX=4577 GN=100273993 PE=4 SV=1;tr|A0A1D6QTN7|A0A1D6QTN7_MAIZE	23.882	9.8	11	11	NaN	NaN	NaN	NaN	NaN	NaN	NaN	NaN	NaN	NaN	NaN	NaN	NaN	23.372	NaN	NaN		catalytic activity;hydrolase activity;hydrolase activity, acting on ester bonds;phosphoric ester hydrolase activity		11	9.8	9.8	178.06	551800000	33
tr|A0A1D6QTZ4|A0A1D6QTZ4_MAIZE Uncharacterized protein OS=Zea mays OX=4577 GN=ZEAMMB73_Zm00001d053974 PE=4 SV=1	1.856	10.6	2	2	NaN	NaN	NaN	NaN	NaN	NaN	NaN	NaN	NaN	NaN	NaN	NaN	NaN	NaN	20.8558	NaN				2	10.6	10.6	33.764	22091000	2
tr|A0A1D6QUK7|A0A1D6QUK7_MAIZE Peptidylprolyl isomerase OS=Zea mays OX=4577 GN=ZEAMMB73_Zm00001d054015 PE=4 SV=1	1.5776	32.6	3	3	NaN	24.6695	NaN	NaN	NaN	NaN	NaN	NaN	25.4438	NaN	NaN	25.9533	NaN	NaN	NaN	NaN				3	32.6	32.6	23.24	200250000	4
tr|A0A1D6QUW4|A0A1D6QUW4_MAIZE Glycosyltransferase family 61 protein OS=Zea mays OX=4577 GN=ZEAMMB73_Zm00001d054066 PE=4 SV=1	10.611	11.9	4	4	NaN	NaN	23.716	23.4054	NaN	NaN	NaN	NaN	NaN	NaN	23.8699	23.3749	23.4423	NaN	22.9638	NaN				4	11.9	11.9	61.379	310010000	30
tr|A0A1D6QVG7|A0A1D6QVG7_MAIZE Protein disulfide isomerase3 OS=Zea mays OX=4577 GN=606411 PE=4 SV=1;tr|Q5EUD9|Q5EUD9_MAIZE Protein disulfide-isomerase OS=Zea mays OX=4577 GN=PDIL1-3 PE=2 SV=1;tr|A0A1D6QVF9|A0A1D6QVF9_MAIZE Protein disulfide-isomerase OS=Ze	138.81	39.8	10	16	NaN	NaN	NaN	NaN	NaN	NaN	23.6592	NaN	NaN	NaN	NaN	NaN	NaN	NaN	NaN	NaN	biological regulation;cell redox homeostasis;cellular homeostasis;cellular process;homeostatic process;regulation of biological process;regulation of biological quality;regulation of cellular process	catalytic activity;intramolecular oxidoreductase activity;intramolecular oxidoreductase activity, interconverting keto- and enol-groups;intramolecular oxidoreductase activity, transposing S-S bonds;isomerase activity;protein disulfide isomerase activity	cell part;cytoplasmic part;endoplasmic reticulum;intracellular membrane-bounded organelle;intracellular organelle;intracellular part;membrane-bounded organelle;organelle	16	39.8	29.7	50.962	799460000	38
tr|A0A1Q1BST7|A0A1Q1BST7_MAIZE Golgin candidate 5 OS=Zea mays OX=4577 GN=ZEAMMB73_Zm00001d009542 PE=4 SV=1	24.679	20	3	6	NaN	NaN	NaN	NaN	NaN	NaN	NaN	NaN	NaN	21.8092	NaN	NaN	21.9801	21.6857	NaN	NaN				3	12.4	12.4	54.261	92457000	10
sp|C0PF72|ARGJ_MAIZE Arginine biosynthesis bifunctional protein ArgJ, chloroplastic OS=Zea mays OX=4577 PE=2 SV=1;tr|A0A1R3LJZ7|A0A1R3LJZ7_MAIZE Arginine biosynthesis bifunctional protein ArgJ, chloroplastic OS=Zea mays OX=4577 GN=ZEAMMB73_Zm00001d028662 P	32.543	17.7	5	5	NaN	24.677	NaN	NaN	NaN	24.1322	NaN	NaN	24.545	NaN	NaN	25.1477	NaN	NaN	NaN	NaN	amine biosynthetic process;amine metabolic process;arginine biosynthetic process;arginine metabolic process;biosynthetic process;carboxylic acid biosynthetic process;carboxylic acid metabolic process;cellular amine metabolic process;cellular amino acid biosynthetic process;cellular amino acid metabolic process;cellular biosynthetic process;cellular ketone metabolic process;cellular metabolic proc…	acetyl-CoA:L-glutamate N-acetyltransferase activity;acetyltransferase activity;catalytic activity;glutamate N-acetyltransferase activity;N-acetyltransferase activity;N-acyltransferase activity;transferase activity;transferase activity, transferring acyl groups;transferase activity, transferring acyl groups other than amino-acyl groups	cell part;chloroplast part;chloroplast stroma;cytoplasmic part;intracellular organelle part;intracellular part;organelle part;plastid part;plastid stroma	5	17.7	17.7	47.951	374510000	22
sp|Q9FYS5|HMGYA_MAIZE HMG-Y-related protein A OS=Zea mays OX=4577 GN=HMGIY2 PE=1 SV=1;tr|A0A1R3M7Z7|A0A1R3M7Z7_MAIZE High mobility group family A 102 OS=Zea mays OX=4577 GN=ZEAMMB73_Zm00001d032239 PE=4 SV=1	12.139	47.2	7	7	NaN	24.8027	24.8554	NaN	NaN	23.2405	NaN	NaN	25.5078	NaN	NaN	25.248	NaN	NaN	NaN	NaN	biological regulation;cellular component assembly;cellular component assembly at cellular level;cellular component organization;cellular component organization at cellular level;cellular component organization or biogenesis;cellular component organization or biogenesis at cellular level;cellular macromolecular complex assembly;cellular macromolecular complex subunit organization;cellular process;…	binding;DNA binding;nucleic acid binding	cell part;chromosomal part;intracellular membrane-bounded organelle;intracellular organelle;intracellular organelle part;intracellular part;macromolecular complex;membrane-bounded organelle;nucleosome;nucleus;organelle;organelle part;protein-DNA complex	7	47.2	47.2	19.824	295740000	27
tr|A0A1X7YF43|A0A1X7YF43_MAIZE Uncharacterized protein OS=Zea mays OX=4577 GN=100382237 PE=4 SV=1;tr|C0P5N5|C0P5N5_MAIZE Uncharacterized protein OS=Zea mays OX=4577 GN=100382237 PE=2 SV=1;tr|A0A1X7YF09|A0A1X7YF09_MAIZE Uncharacterized protein OS=Zea mays O	1.6379	3.5	2	2	NaN	NaN	NaN	NaN	NaN	NaN	NaN	NaN	NaN	NaN	NaN	21.6489	NaN	NaN	NaN	NaN	cellular macromolecule metabolic process;cellular metabolic process;cellular nitrogen compound metabolic process;cellular process;cellular response to stimulus;cellular response to stress;DNA metabolic process;DNA repair;macromolecule metabolic process;metabolic process;nitrogen compound metabolic process;nucleic acid metabolic process;nucleobase-containing compound metabolic process;primary meta…	binding;catalytic activity;cation binding;hydrolase activity;hydrolase activity, acting on acid anhydrides;hydrolase activity, acting on acid anhydrides, in phosphorus-containing anhydrides;hydrolase activity, acting on ester bonds;ion binding;metal ion binding;nucleic acid binding;phosphoric diester hydrolase activity;phosphoric ester hydrolase activity;transition metal ion binding;zinc ion bind…	cell part;intracellular membrane-bounded organelle;intracellular organelle;intracellular part;membrane-bounded organelle;nucleus;organelle	2	3.5	3.5	108.05	7550100000	3
tr|A0A1X7YII0|A0A1X7YII0_MAIZE Exocyst subunit Exo70 family protein OS=Zea mays OX=4577 PE=3 SV=1	16.406	11.6	5	5	NaN	NaN	NaN	NaN	22.7361	NaN	NaN	NaN	NaN	NaN	NaN	NaN	NaN	NaN	NaN	NaN				5	11.6	11.6	74.947	210760000	21
sp|P06588|RR19_MAIZE 30S ribosomal protein S19, chloroplastic OS=Zea mays OX=4577 GN=rps19-A PE=3 SV=4;tr|A0A3B6UA96|A0A3B6UA96_MAIZE Uncharacterized protein OS=Zea mays OX=4577 PE=3 SV=1	9.7729	58.1	6	6	21.804	21.5133	21.5184	NaN	NaN	NaN	NaN	NaN	26.5945	21.9277	NaN	NaN	NaN	NaN	NaN	NaN	biosynthetic process;cellular biosynthetic process;cellular macromolecule biosynthetic process;cellular macromolecule metabolic process;cellular metabolic process;cellular process;cellular protein metabolic process;macromolecule biosynthetic process;macromolecule metabolic process;metabolic process;primary metabolic process;protein metabolic process;translation	binding;nucleic acid binding;RNA binding;rRNA binding;structural constituent of ribosome;structural molecule activity	cell part;chloroplast;cytoplasmic part;intracellular membrane-bounded organelle;intracellular organelle;intracellular organelle part;intracellular part;macromolecular complex;membrane-bounded organelle;organelle;organelle part;plastid;ribonucleoprotein complex;small ribosomal subunit	6	58.1	58.1	10.756	107550000	13
tr|A7XZC6|A7XZC6_MAIZE Phosphoethanolamine N-methyltransferase 3 OS=Zea mays OX=4577 GN=PEAMT PE=2 SV=1;tr|A0A1D6MBP7|A0A1D6MBP7_MAIZE Phosphoethanolamine N-methyltransferase 3 OS=Zea mays OX=4577 GN=100383478 PE=4 SV=1;tr|A0A1D6MBP4|A0A1D6MBP4_MAIZE Phosp	6.1777	14.2	3	4	NaN	NaN	NaN	NaN	NaN	NaN	NaN	NaN	NaN	24.1451	NaN	NaN	NaN	NaN	NaN	NaN	alcohol metabolic process;amine metabolic process;biosynthetic process;cellular amine metabolic process;cellular biogenic amine metabolic process;cellular biosynthetic process;cellular lipid metabolic process;cellular metabolic process;cellular nitrogen compound metabolic process;cellular process;ethanolamine-containing compound metabolic process;glycerolipid biosynthetic process;glycerolipid met…	catalytic activity;methyltransferase activity;N-methyltransferase activity;phosphoethanolamine N-methyltransferase activity;S-adenosylmethionine-dependent methyltransferase activity;transferase activity;transferase activity, transferring one-carbon groups		3	12	12	56.774	71306000	5
sp|P27787|FER1_MAIZE Ferredoxin-1, chloroplastic OS=Zea mays OX=4577 GN=FDX1 PE=1 SV=1;tr|B1P759|B1P759_MAIZE Ferredoxin OS=Zea mays OX=4577 GN=FDX1 PE=2 SV=1	4.835	34.7	1	3	NaN	NaN	NaN	NaN	NaN	NaN	NaN	NaN	NaN	NaN	NaN	NaN	NaN	27.9175	NaN	NaN	cellular metabolic process;cellular process;electron transport chain;generation of precursor metabolites and energy;metabolic process;oxidation-reduction process	2 iron, 2 sulfur cluster binding;binding;cation binding;electron carrier activity;ion binding;iron-sulfur cluster binding;metal cluster binding;metal ion binding	cell part;chloroplast;cytoplasmic part;intracellular membrane-bounded organelle;intracellular organelle;intracellular part;membrane-bounded organelle;organelle;plastid	3	34.7	22.7	15.838	641730000	4
tr|B4F7U1|B4F7U1_MAIZE Uncharacterized protein OS=Zea mays OX=4577 GN=100191155 PE=2 SV=1	2.9621	12	2	2	NaN	NaN	22.5927	NaN	NaN	NaN	NaN	NaN	NaN	NaN	NaN	NaN	NaN	NaN	NaN	NaN			cell part;cytoplasmic part;cytosol;intracellular part	2	12	12	36.099	63677000	3
tr|B4F7W4|B4F7W4_MAIZE Putative inactive shikimate kinase like 2 chloroplastic OS=Zea mays OX=4577 GN=ZEAMMB73_Zm00001d030109 PE=2 SV=1;tr|A0A1D6K9Y9|A0A1D6K9Y9_MAIZE Putative inactive shikimate kinase like 2 chloroplastic OS=Zea mays OX=4577 GN=ZEAMMB73_Z	6.8158	12	2	2	NaN	23.7211	NaN	NaN	NaN	NaN	NaN	NaN	NaN	NaN	NaN	NaN	NaN	NaN	NaN	NaN	alcohol metabolic process;amine biosynthetic process;amine catabolic process;amine metabolic process;anatomical structure morphogenesis;aromatic amino acid family biosynthetic process;aromatic amino acid family metabolic process;aromatic compound biosynthetic process;biological regulation;biosynthetic process;carbohydrate metabolic process;carboxylic acid biosynthetic process;carboxylic acid cata…			2	12	12	41.492	69382000	8
tr|B4F822|B4F822_MAIZE Proteasome subunit alpha type OS=Zea mays OX=4577 GN=100191224 PE=2 SV=1	179.93	81.9	2	16	NaN	22.5549	NaN	NaN	NaN	NaN	NaN	NaN	NaN	NaN	24.6888	NaN	NaN	NaN	NaN	NaN	catabolic process;cellular catabolic process;cellular macromolecule catabolic process;cellular macromolecule metabolic process;cellular metabolic process;cellular process;macromolecule catabolic process;macromolecule metabolic process;metabolic process;modification-dependent macromolecule catabolic process;modification-dependent protein catabolic process;primary metabolic process;protein metaboli…	catalytic activity;endopeptidase activity;hydrolase activity;peptidase activity;peptidase activity, acting on L-amino acid peptides;threonine-type endopeptidase activity;threonine-type peptidase activity	cell part;cytoplasm;intracellular membrane-bounded organelle;intracellular organelle;intracellular part;macromolecular complex;membrane-bounded organelle;nucleus;organelle;proteasome core complex, alpha-subunit complex;protein complex	16	81.9	11.6	27.257	177040000	14
tr|B4F845|B4F845_MAIZE Uncharacterized protein OS=Zea mays OX=4577 GN=100191245 PE=2 SV=1	11.032	24.8	5	5	NaN	NaN	NaN	22.5451	NaN	NaN	NaN	NaN	NaN	NaN	NaN	22.8529	NaN	NaN	NaN	NaN	cellular macromolecule metabolic process;cellular metabolic process;cellular process;cellular protein metabolic process;cellular response to stimulus;cellular response to stress;defense response;defense response, incompatible interaction;immune response;immune system process;innate immune response;macromolecule metabolic process;metabolic process;multi-organism process;primary metabolic process;p…		cell part;cytoplasmic part;endoplasmic reticulum;intracellular membrane-bounded organelle;intracellular organelle;intracellular part;membrane;membrane-bounded organelle;organelle;plasma membrane	5	24.8	24.8	33.964	159010000	18
tr|B4FQC9|B4FQC9_MAIZE Proline iminopeptidase OS=Zea mays OX=4577 GN=100272740 PE=2 SV=1;tr|B4F869|B4F869_MAIZE Proline iminopeptidase OS=Zea mays OX=4577 GN=100272740 PE=2 SV=1;tr|A0A1D6M9V1|A0A1D6M9V1_MAIZE Proline iminopeptidase OS=Zea mays OX=4577 GN=1	9.3287	38.2	7	7	NaN	24.4819	24.2471	NaN	NaN	NaN	NaN	NaN	NaN	NaN	NaN	24.7549	NaN	NaN	NaN	NaN		aminopeptidase activity;catalytic activity;exopeptidase activity;hydrolase activity;peptidase activity;peptidase activity, acting on L-amino acid peptides	cell part;cytoplasm;intracellular part	7	38.2	38.2	36.602	293120000	14
tr|B4F8B1|B4F8B1_MAIZE Transcription factor IIS protein OS=Zea mays OX=4577 GN=100274429 PE=2 SV=1	13.232	20.2	7	7	NaN	NaN	NaN	NaN	NaN	NaN	NaN	NaN	NaN	NaN	NaN	NaN	NaN	24.0309	NaN	NaN	biological regulation;biosynthetic process;cellular biosynthetic process;cellular macromolecule biosynthetic process;cellular macromolecule metabolic process;cellular metabolic process;cellular nitrogen compound metabolic process;cellular process;macromolecule biosynthetic process;macromolecule metabolic process;metabolic process;nitrogen compound metabolic process;nucleic acid metabolic process;…	binding;cation binding;DNA binding;ion binding;metal ion binding;nucleic acid binding;transition metal ion binding;zinc ion binding	cell part;intracellular membrane-bounded organelle;intracellular organelle;intracellular part;membrane-bounded organelle;nucleus;organelle	7	20.2	20.2	41.122	308400000	28
tr|B4F8D4|B4F8D4_MAIZE Dihydrodipicolinate synthase 2 OS=Zea mays OX=4577 GN=542379 PE=2 SV=1	17.213	10.5	2	6	NaN	NaN	NaN	NaN	NaN	NaN	NaN	NaN	NaN	NaN	NaN	NaN	NaN	NaN	NaN	23.2588	amine biosynthetic process;amine metabolic process;aspartate family amino acid biosynthetic process;aspartate family amino acid metabolic process;biosynthetic process;carboxylic acid biosynthetic process;carboxylic acid metabolic process;cellular amine metabolic process;cellular amino acid biosynthetic process;cellular amino acid metabolic process;cellular biosynthetic process;cellular ketone met…	carbon-oxygen lyase activity;catalytic activity;dihydrodipicolinate synthase activity;hydro-lyase activity;lyase activity		6	10.5	4.2	41.216	90556000	15
tr|B6TW56|B6TW56_MAIZE SAM domain family protein OS=Zea mays OX=4577 GN=100191379 PE=2 SV=1;tr|B4F8L5|B4F8L5_MAIZE Sterile alpha motif (SAM) domain-containing protein OS=Zea mays OX=4577 GN=100191379 PE=2 SV=1;tr|A0A1D6ED21|A0A1D6ED21_MAIZE Sterile alpha m	27.965	21	4	4	23.8493	NaN	NaN	NaN	NaN	NaN	NaN	NaN	23.9629	NaN	NaN	NaN	NaN	NaN	NaN	NaN				4	21	21	23.695	230900000	29
tr|B4F8P0|B4F8P0_MAIZE Eukaryotic aspartyl protease family protein OS=Zea mays OX=4577 GN=100191400 PE=2 SV=1	18.892	20.7	8	8	24.16	25.0916	24.7211	24.6728	NaN	NaN	NaN	NaN	NaN	NaN	NaN	NaN	NaN	NaN	24.0434	24.3587		aspartic-type endopeptidase activity;aspartic-type peptidase activity;catalytic activity;endopeptidase activity;hydrolase activity;peptidase activity;peptidase activity, acting on L-amino acid peptides		8	20.7	20.7	46.645	556230000	24
tr|B4F8R5|B4F8R5_MAIZE Putative beta-D-xylosidase 7 OS=Zea mays OX=4577 GN=100191418 PE=2 SV=1;tr|A0A1D6HKN1|A0A1D6HKN1_MAIZE Putative beta-D-xylosidase 7 OS=Zea mays OX=4577 GN=100191418 PE=4 SV=1;tr|A0A1D6HKN2|A0A1D6HKN2_MAIZE Putative beta-D-xylosidase	16.834	21	9	9	24.1697	23.3927	24.1506	NaN	NaN	23.7352	NaN	NaN	NaN	NaN	NaN	NaN	NaN	NaN	NaN	NaN	carbohydrate metabolic process;metabolic process;primary metabolic process	catalytic activity;hydrolase activity;hydrolase activity, acting on glycosyl bonds;hydrolase activity, hydrolyzing O-glycosyl compounds		9	21	21	83.942	451530000	27
tr|B4F9F9|B4F9F9_MAIZE ADP-ribosylation factor GTPase-activating protein AGD10 OS=Zea mays OX=4577 GN=100191606 PE=2 SV=1;tr|A0A1D6LC61|A0A1D6LC61_MAIZE ADP-ribosylation factor GTPase-activating protein AGD10 OS=Zea mays OX=4577 GN=100191606 PE=4 SV=1	296.45	52.2	13	23	24.203	23.4605	NaN	NaN	NaN	NaN	NaN	NaN	23.8599	24.3658	23.8123	NaN	24.3006	NaN	NaN	23.4311		binding;cation binding;ion binding;metal ion binding;transition metal ion binding;zinc ion binding		23	52.2	25.5	44.896	1743600000	89
tr|B4F9H1|B4F9H1_MAIZE Glycosyltransferase OS=Zea mays OX=4577 GN=100191617 PE=2 SV=1	22.284	21.8	7	7	23.4372	NaN	NaN	NaN	NaN	NaN	NaN	NaN	NaN	23.1619	NaN	23.0747	NaN	NaN	23.2661	NaN		catalytic activity;transferase activity;transferase activity, transferring glycosyl groups;transferase activity, transferring hexosyl groups		7	21.8	21.8	50.192	191530000	13
tr|B4F9Y2|B4F9Y2_MAIZE DEAD-box ATP-dependent RNA helicase 52 OS=Zea mays OX=4577 GN=100191727 PE=2 SV=1	1.9561	7.5	2	3	NaN	NaN	NaN	NaN	24.3069	NaN	NaN	NaN	NaN	NaN	NaN	NaN	NaN	NaN	NaN	NaN		adenyl nucleotide binding;adenyl ribonucleotide binding;ATP binding;binding;catalytic activity;helicase activity;hydrolase activity;hydrolase activity, acting on acid anhydrides;hydrolase activity, acting on acid anhydrides, in phosphorus-containing anhydrides;nucleic acid binding;nucleoside-triphosphatase activity;nucleotide binding;purine nucleotide binding;purine ribonucleoside triphosphate bi…		2	5.5	5.5	64.613	355690000	23
tr|A0A1D6PIG1|A0A1D6PIG1_MAIZE Inositol-3-phosphate synthase isozyme 1 OS=Zea mays OX=4577 GN=100037797 PE=4 SV=1;tr|A1JUJ0|A1JUJ0_MAIZE Inositol-3-phosphate synthase isozyme 1 OS=Zea mays OX=4577 GN=mips2 PE=2 SV=1;tr|A0A1D6PIF6|A0A1D6PIF6_MAIZE Inositol-	323.31	68.9	4	27	25.7234	24.0703	25.5254	26.2153	26.1537	25.4276	27.2987	28.458	24.5155	24.56	24.6287	24.4043	24.716	26.7737	26.7599	27.6342	alcohol biosynthetic process;alcohol metabolic process;biosynthetic process;carbohydrate biosynthetic process;carbohydrate metabolic process;cellular biosynthetic process;cellular carbohydrate biosynthetic process;cellular carbohydrate metabolic process;cellular lipid metabolic process;cellular metabolic process;cellular process;inositol biosynthetic process;inositol metabolic process;lipid biosy…	catalytic activity;inositol-3-phosphate synthase activity;intramolecular lyase activity;isomerase activity		27	68.9	17	53.955	1850800000	77
tr|B4FAG0|B4FAG0_MAIZE dTDP-glucose dehydratase homolog csu219 OS=Zea mays OX=4577 GN=100191862 PE=2 SV=1;tr|A0A1D6JYA0|A0A1D6JYA0_MAIZE dTDP-glucose dehydratase homolog csu219 OS=Zea mays OX=4577 GN=100191862 PE=4 SV=1;tr|A0A1D6JYA1|A0A1D6JYA1_MAIZE dTDP-	298.71	64.3	8	18	NaN	25.1411	25.0333	NaN	NaN	NaN	NaN	NaN	NaN	NaN	NaN	NaN	NaN	NaN	24.7913	NaN		binding;catalytic activity;coenzyme binding;cofactor binding		18	64.3	33.4	39.31	950120000	43
tr|B4FAL9|B4FAL9_MAIZE Fructose-bisphosphate aldolase OS=Zea mays OX=4577 GN=542261 PE=2 SV=1;sp|P08440|ALF_MAIZE Fructose-bisphosphate aldolase, cytoplasmic isozyme OS=Zea mays OX=4577 PE=2 SV=1	323.31	86.8	2	44	NaN	NaN	NaN	NaN	NaN	NaN	NaN	NaN	NaN	NaN	NaN	24.0196	NaN	NaN	NaN	NaN	alcohol catabolic process;alcohol metabolic process;carbohydrate catabolic process;carbohydrate metabolic process;catabolic process;cellular carbohydrate catabolic process;cellular carbohydrate metabolic process;cellular metabolic process;cellular process;generation of precursor metabolites and energy;glucose catabolic process;glucose metabolic process;glycolysis;hexose catabolic process;hexose m…	aldehyde-lyase activity;carbon-carbon lyase activity;catalytic activity;fructose-bisphosphate aldolase activity;lyase activity	cell part;cytoplasm;intracellular part	44	86.8	6.5	38.59	606810000	32
tr|B4FB35|B4FB35_MAIZE Translation machinery-associated protein 22 OS=Zea mays OX=4577 GN=100192042 PE=2 SV=1;tr|A0A1D6MHI1|A0A1D6MHI1_MAIZE Translation machinery-associated protein 22 OS=Zea mays OX=4577 GN=100192042 PE=3 SV=1;tr|A0A1D6MHI3|A0A1D6MHI3_MAI	13.092	48.8	3	5	24.0363	23.8866	NaN	NaN	NaN	24.1215	NaN	NaN	24.4292	NaN	NaN	NaN	NaN	NaN	NaN	NaN		binding;nucleic acid binding;RNA binding;translation factor activity, nucleic acid binding;translation initiation factor activity	cell part;cytoplasmic part;intracellular non-membrane-bounded organelle;intracellular organelle;intracellular part;macromolecular complex;non-membrane-bounded organelle;organelle;ribonucleoprotein complex;ribosome	5	48.8	40.4	21.62	207890000	20
tr|B4FNJ6|B4FNJ6_MAIZE Ras-related protein ARA-3 OS=Zea mays OX=4577 GN=100272423 PE=2 SV=1;tr|B4FB55|B4FB55_MAIZE Ras-related protein ARA-3 OS=Zea mays OX=4577 GN=103635765 PE=2 SV=1;tr|A0A1D6L9Q7|A0A1D6L9Q7_MAIZE Ras-related protein RABE1c OS=Zea mays OX	8.0094	17.2	2	3	NaN	22.3076	21.7833	NaN	NaN	NaN	NaN	NaN	NaN	NaN	NaN	22.2068	NaN	NaN	NaN	NaN	biological regulation;cellular process;cellular response to stimulus;establishment of localization;establishment of protein localization;intracellular signal transduction;protein transport;regulation of biological process;regulation of cellular process;response to stimulus;signal transduction;small GTPase mediated signal transduction;transport	binding;GTP binding;guanyl nucleotide binding;guanyl ribonucleotide binding;nucleotide binding;purine nucleotide binding;purine ribonucleoside triphosphate binding;purine ribonucleotide binding;ribonucleotide binding		3	17.2	12.1	23.82	54747000	12
tr|B4FB62|B4FB62_MAIZE E3 ubiquitin-protein ligase RING1-like OS=Zea mays OX=4577 GN=100192058 PE=2 SV=1	12.345	15.6	3	3	23.0321	23.1613	23.2726	NaN	NaN	NaN	NaN	NaN	NaN	NaN	NaN	NaN	23.287	NaN	22.7406	23.2603		binding;cation binding;ion binding;metal ion binding;transition metal ion binding;zinc ion binding		3	15.6	15.6	39.762	254570000	24
tr|B4FBJ7|B4FBJ7_MAIZE 26S protease regulatory subunit 6A homolog A OS=Zea mays OX=4577 GN=100274559 PE=2 SV=1;tr|C0P9N3|C0P9N3_MAIZE 26S protease regulatory subunit 6A homolog A OS=Zea mays OX=4577 GN=100274559 PE=2 SV=1;tr|A0A1D6LY58|A0A1D6LY58_MAIZE 26S	52.276	62.8	1	29	NaN	NaN	NaN	NaN	NaN	NaN	NaN	23.8255	NaN	NaN	NaN	NaN	NaN	NaN	NaN	NaN	catabolic process;macromolecule catabolic process;macromolecule metabolic process;metabolic process;primary metabolic process;protein catabolic process;protein metabolic process	adenyl nucleotide binding;adenyl ribonucleotide binding;ATP binding;binding;catalytic activity;hydrolase activity;nucleotide binding;purine nucleotide binding;purine ribonucleoside triphosphate binding;purine ribonucleotide binding;ribonucleotide binding	cell part;cytoplasm;intracellular part	2	7.2	4.7	47.81	296820000	25
sp|Q41741|IF4A_MAIZE Eukaryotic initiation factor 4A OS=Zea mays OX=4577 PE=2 SV=1;tr|B4FBK3|B4FBK3_MAIZE Eukaryotic initiation factor 4A OS=Zea mays OX=4577 GN=100284697 PE=2 SV=1	70.671	75.9	2	36	NaN	NaN	23.2025	NaN	NaN	NaN	23.7563	24.0801	23.601	23.682	23.6467	23.5065	NaN	NaN	NaN	NaN		adenyl nucleotide binding;adenyl ribonucleotide binding;ATP binding;binding;catalytic activity;helicase activity;hydrolase activity;hydrolase activity, acting on acid anhydrides;hydrolase activity, acting on acid anhydrides, in phosphorus-containing anhydrides;nucleic acid binding;nucleoside-triphosphatase activity;nucleotide binding;purine nucleotide binding;purine ribonucleoside triphosphate bi…		4	16.1	8.5	46.536	626050000	16
tr|B4FBN8|B4FBN8_MAIZE Chitinase 1 OS=Zea mays OX=4577 GN=100192522 PE=2 SV=1	105.62	25.2	3	4	NaN	NaN	NaN	22.4788	NaN	24.6307	NaN	NaN	NaN	NaN	NaN	NaN	NaN	NaN	NaN	NaN	carbohydrate metabolic process;metabolic process;primary metabolic process	catalytic activity;hydrolase activity;hydrolase activity, acting on glycosyl bonds;hydrolase activity, hydrolyzing O-glycosyl compounds		4	25.2	19.6	31.128	247600000	20
tr|B4FCC2|B4FCC2_MAIZE Zinc knuckle (CCHC-type) family protein OS=Zea mays OX=4577 GN=100192703 PE=2 SV=1	5.0447	12.4	4	4	22.2974	NaN	NaN	22.2195	NaN	NaN	NaN	NaN	NaN	NaN	22.108	NaN	NaN	NaN	NaN	NaN		binding;cation binding;ion binding;metal ion binding;nucleic acid binding;transition metal ion binding;zinc ion binding		4	12.4	12.4	53.579	87930000	16
tr|B4FCX9|B4FCX9_MAIZE Alpha-L-fucosidase 1 OS=Zea mays OX=4577 GN=100192871 PE=2 SV=1;tr|A0A1D6E3G0|A0A1D6E3G0_MAIZE Alpha-L-fucosidase 1 OS=Zea mays OX=4577 GN=100192871 PE=4 SV=1	6.4942	9.2	4	4	NaN	NaN	NaN	NaN	NaN	23.4363	NaN	NaN	NaN	NaN	NaN	NaN	NaN	NaN	NaN	NaN	carbohydrate metabolic process;catabolic process;cellular macromolecule metabolic process;cellular metabolic process;cellular process;glycoprotein catabolic process;glycoprotein metabolic process;macromolecule catabolic process;macromolecule metabolic process;metabolic process;primary metabolic process	alpha-L-fucosidase activity;catalytic activity;fucosidase activity;hydrolase activity;hydrolase activity, acting on glycosyl bonds;hydrolase activity, hydrolyzing O-glycosyl compounds	cell part;cytoplasmic part;intracellular membrane-bounded organelle;intracellular organelle;intracellular part;membrane-bounded organelle;organelle;vacuole	4	9.2	9.2	56.647	402420000	11
tr|B4FD90|B4FD90_MAIZE 40S ribosomal protein S19 OS=Zea mays OX=4577 GN=100192949 PE=2 SV=1	56.609	75.9	4	16	NaN	NaN	NaN	NaN	NaN	NaN	NaN	NaN	24.8266	24.2695	NaN	NaN	23.7389	24.708	NaN	NaN	biosynthetic process;cellular biosynthetic process;cellular macromolecule biosynthetic process;cellular macromolecule metabolic process;cellular metabolic process;cellular process;cellular protein metabolic process;macromolecule biosynthetic process;macromolecule metabolic process;metabolic process;primary metabolic process;protein metabolic process;translation	structural constituent of ribosome;structural molecule activity	cell part;cytoplasmic part;intracellular non-membrane-bounded organelle;intracellular organelle;intracellular part;macromolecular complex;non-membrane-bounded organelle;organelle;ribonucleoprotein complex;ribosome	16	75.9	19.3	16.266	459670000	8
tr|B4FDB1|B4FDB1_MAIZE NAD(P)-binding Rossmann-fold superfamily protein OS=Zea mays OX=4577 GN=100192966 PE=2 SV=1;tr|A0A1D6P4J9|A0A1D6P4J9_MAIZE NAD(P)-binding Rossmann-fold superfamily protein OS=Zea mays OX=4577 GN=100192966 PE=4 SV=1;tr|A0A1D6P4K2|A0A1	26.686	24.1	4	4	NaN	NaN	24.3558	NaN	NaN	23.9939	NaN	NaN	NaN	NaN	NaN	NaN	NaN	NaN	NaN	NaN		binding;catalytic activity;coenzyme binding;cofactor binding		4	24.1	24.1	34.931	43774000	4
tr|B4FDC9|B4FDC9_MAIZE Chlorophyll A-B binding family protein OS=Zea mays OX=4577 GN=100285503 PE=2 SV=1	20.077	14.6	3	3	23.8863	NaN	23.9675	NaN	NaN	NaN	NaN	NaN	23.9265	NaN	NaN	24.3962	NaN	NaN	23.8692	NaN				3	14.6	14.6	27.135	92061000	10
tr|B4FDY6|B4FDY6_MAIZE Proteasome subunit alpha type OS=Zea mays OX=4577 GN=100193140 PE=2 SV=1	51.347	38	2	5	NaN	24.0718	NaN	NaN	NaN	NaN	NaN	NaN	24.0658	24.5299	NaN	23.9083	NaN	NaN	NaN	NaN	catabolic process;cellular catabolic process;cellular macromolecule catabolic process;cellular macromolecule metabolic process;cellular metabolic process;cellular process;macromolecule catabolic process;macromolecule metabolic process;metabolic process;modification-dependent macromolecule catabolic process;modification-dependent protein catabolic process;primary metabolic process;protein metaboli…	catalytic activity;endopeptidase activity;hydrolase activity;peptidase activity;peptidase activity, acting on L-amino acid peptides;threonine-type endopeptidase activity;threonine-type peptidase activity	cell part;cytoplasm;intracellular membrane-bounded organelle;intracellular organelle;intracellular part;macromolecular complex;membrane-bounded organelle;nucleus;organelle;proteasome core complex, alpha-subunit complex;protein complex	5	38	19.2	27.009	360610000	18
tr|B4FE67|B4FE67_MAIZE RNA-binding (RRM/RBD/RNP motifs) family protein OS=Zea mays OX=4577 GN=100193201 PE=2 SV=1;tr|A0A1D6G4P2|A0A1D6G4P2_MAIZE RNA-binding (RRM/RBD/RNP motifs) family protein OS=Zea mays OX=4577 GN=100193201 PE=4 SV=1;tr|A0A1D6G4N2|A0A1D6	203.09	35.3	2	8	NaN	NaN	NaN	23.2081	NaN	NaN	NaN	NaN	NaN	NaN	NaN	NaN	NaN	NaN	NaN	NaN		binding;nucleic acid binding;nucleotide binding	cell part;intracellular part;macromolecular complex;ribonucleoprotein complex;viral nucleocapsid;virion part	8	35.3	7.2	39.802	199140000	16
tr|B4FEC3|B4FEC3_MAIZE Pyruvate kinase OS=Zea mays OX=4577 GN=100193244 PE=2 SV=1;tr|A0A1D6HTM6|A0A1D6HTM6_MAIZE Pyruvate kinase OS=Zea mays OX=4577 GN=100193244 PE=3 SV=1;tr|A0A1D6HTM9|A0A1D6HTM9_MAIZE Pyruvate kinase OS=Zea mays OX=4577 GN=100193244 PE=3	12.024	24.8	7	11	NaN	NaN	24.1406	NaN	24.3019	NaN	NaN	NaN	NaN	NaN	NaN	NaN	NaN	NaN	NaN	NaN	alcohol catabolic process;alcohol metabolic process;carbohydrate catabolic process;carbohydrate metabolic process;catabolic process;cellular carbohydrate catabolic process;cellular carbohydrate metabolic process;cellular metabolic process;cellular process;generation of precursor metabolites and energy;glucose catabolic process;glucose metabolic process;glycolysis;hexose catabolic process;hexose m…	alkali metal ion binding;binding;catalytic activity;cation binding;ion binding;kinase activity;magnesium ion binding;metal ion binding;phosphotransferase activity, alcohol group as acceptor;potassium ion binding;pyruvate kinase activity;transferase activity;transferase activity, transferring phosphorus-containing groups		11	24.8	17.1	62.539	359180000	14
tr|B4FEE3|B4FEE3_MAIZE 60S ribosomal protein L27 OS=Zea mays OX=4577 GN=103642077 PE=2 SV=1	9.3136	50.4	2	6	NaN	22.0707	22.3975	NaN	NaN	24.1411	NaN	NaN	NaN	NaN	NaN	NaN	NaN	NaN	NaN	NaN	biosynthetic process;cellular biosynthetic process;cellular macromolecule biosynthetic process;cellular macromolecule metabolic process;cellular metabolic process;cellular process;cellular protein metabolic process;macromolecule biosynthetic process;macromolecule metabolic process;metabolic process;primary metabolic process;protein metabolic process;translation	structural constituent of ribosome;structural molecule activity	cell part;cytoplasmic part;intracellular non-membrane-bounded organelle;intracellular organelle;intracellular part;macromolecular complex;non-membrane-bounded organelle;organelle;ribonucleoprotein complex;ribosome	6	50.4	21.2	15.636	130230000	7
tr|B4FFF1|B4FFF1_MAIZE Ran-binding protein 1 homolog a OS=Zea mays OX=4577 GN=100193549 PE=2 SV=1;tr|A0A1D6JZE5|A0A1D6JZE5_MAIZE Ran-binding protein 1 homolog a OS=Zea mays OX=4577 GN=100193549 PE=4 SV=1;tr|A0A1D6JZE7|A0A1D6JZE7_MAIZE Ran-binding protein 1	317.84	55	5	8	23.5477	NaN	NaN	NaN	NaN	NaN	26.2433	NaN	NaN	NaN	NaN	NaN	NaN	NaN	NaN	NaN	establishment of localization;establishment of localization in cell;intracellular transport;transport			6	46.4	40.7	23.119	891800000	56
tr|B4FFP6|B4FFP6_MAIZE Nascent polypeptide-associated complex subunit beta OS=Zea mays OX=4577 GN=100193616 PE=2 SV=1;tr|A0A1D6LBY6|A0A1D6LBY6_MAIZE Nascent polypeptide-associated complex subunit beta OS=Zea mays OX=4577 GN=100193616 PE=3 SV=1	16.803	55.1	4	4	24.3676	24.631	24.4513	NaN	NaN	24.6561	NaN	NaN	23.9169	NaN	NaN	24.2308	NaN	NaN	NaN	NaN	biological regulation;biosynthetic process;cellular biosynthetic process;cellular macromolecule biosynthetic process;cellular macromolecule metabolic process;cellular metabolic process;cellular nitrogen compound metabolic process;cellular process;macromolecule biosynthetic process;macromolecule metabolic process;metabolic process;nitrogen compound metabolic process;nucleic acid metabolic process;…			4	55.1	55.1	17.315	429330000	24
tr|B4FFV3|B4FFV3_MAIZE Malate dehydrogenase OS=Zea mays OX=4577 GN=100193663 PE=2 SV=1	63.383	43.1	4	11	NaN	22.7595	23.2296	NaN	NaN	NaN	NaN	NaN	23.8808	NaN	22.8951	24.6674	NaN	NaN	23.7745	NaN	acetyl-CoA catabolic process;acetyl-CoA metabolic process;carbohydrate metabolic process;carboxylic acid metabolic process;catabolic process;cellular catabolic process;cellular ketone metabolic process;cellular metabolic process;cellular process;coenzyme catabolic process;coenzyme metabolic process;cofactor catabolic process;cofactor metabolic process;dicarboxylic acid metabolic process;malate me…	catalytic activity;L-malate dehydrogenase activity;malate dehydrogenase activity;oxidoreductase activity;oxidoreductase activity, acting on CH-OH group of donors;oxidoreductase activity, acting on the CH-OH group of donors, NAD or NADP as acceptor		4	19.6	19.6	41.616	353390000	39
tr|A0A1D6IBP5|A0A1D6IBP5_MAIZE Asparagine--tRNA ligase chloroplastic/mitochondrial OS=Zea mays OX=4577 GN=ZEAMMB73_Zm00001d021507 PE=3 SV=1;tr|A0A1D6EVR1|A0A1D6EVR1_MAIZE Asparagine--tRNA ligase chloroplastic/mitochondrial OS=Zea mays OX=4577 GN=100217176	26.607	29.7	13	14	24.5027	25.0512	25.571	25.6514	27.2469	25.2657	28.2421	27.9161	23.5299	25.2307	25.3402	23.8196	25.564	26.0712	25.4369	26.5009				13	27.3	27.3	60.908	1125700000	65
tr|A0A1D6LEN8|A0A1D6LEN8_MAIZE MA3 domain-containing protein OS=Zea mays OX=4577 GN=100501384 PE=4 SV=1;tr|A0A1D6LEN7|A0A1D6LEN7_MAIZE MA3 domain-containing protein OS=Zea mays OX=4577 GN=100501384 PE=4 SV=1;tr|A0A1D6LEN9|A0A1D6LEN9_MAIZE MA3 domain-contai	252.2	42.4	23	23	NaN	23.3805	23.8277	24.2134	26.7818	24.854	26.5615	26.2575	23.9008	24.423	24.4221	24.2415	24.2619	25.502	NaN	25.3323				23	42.4	42.4	78.928	2287000000	161
tr|B4FGJ4|B4FGJ4_MAIZE Pyruvate dehydrogenase E1 component subunit alpha OS=Zea mays OX=4577 GN=732791 PE=2 SV=1	8.9212	67.4	4	27	NaN	24.5918	NaN	NaN	NaN	NaN	NaN	NaN	NaN	NaN	NaN	24.5315	NaN	NaN	NaN	NaN	alcohol catabolic process;alcohol metabolic process;carbohydrate catabolic process;carbohydrate metabolic process;catabolic process;cellular carbohydrate catabolic process;cellular carbohydrate metabolic process;cellular metabolic process;cellular process;generation of precursor metabolites and energy;glucose catabolic process;glucose metabolic process;glycolysis;hexose catabolic process;hexose m…	catalytic activity;oxidoreductase activity;oxidoreductase activity, acting on the aldehyde or oxo group of donors;oxidoreductase activity, acting on the aldehyde or oxo group of donors, disulfide as acceptor;pyruvate dehydrogenase (acetyl-transferring) activity;pyruvate dehydrogenase activity	cell part;intracellular membrane-bounded organelle;intracellular organelle;intracellular part;membrane-bounded organelle;organelle	4	7.9	7.9	42.75	625160000	29
tr|B4FGL3|B4FGL3_MAIZE Putative ATP synthase 24 kDa subunit mitochondrial OS=Zea mays OX=4577 GN=ZEAMMB73_Zm00001d015134 PE=2 SV=1;tr|C0P4U8|C0P4U8_MAIZE Putative ATP synthase 24 kDa subunit mitochondrial OS=Zea mays OX=4577 GN=ZEAMMB73_Zm00001d053983 PE=2	25.958	19.3	4	4	NaN	NaN	NaN	NaN	NaN	NaN	NaN	NaN	23.5534	NaN	NaN	23.8709	NaN	NaN	NaN	NaN				4	19.3	19.3	27.653	269220000	18
tr|B4FGR6|B4FGR6_MAIZE Eukaryotic translation initiation factor 2 subunit beta OS=Zea mays OX=4577 GN=100193916 PE=2 SV=1;tr|A0A1D6F4G0|A0A1D6F4G0_MAIZE Eukaryotic translation initiation factor 2 subunit beta OS=Zea mays OX=4577 GN=100193916 PE=4 SV=1;tr|A	33.982	57.3	3	16	NaN	NaN	NaN	NaN	NaN	NaN	NaN	NaN	NaN	NaN	NaN	NaN	NaN	NaN	23.607	24.5301		binding;nucleic acid binding;RNA binding;translation factor activity, nucleic acid binding;translation initiation factor activity		16	57.3	21	30.255	242090000	14
tr|B4FH55|B4FH55_MAIZE Histone H2A OS=Zea mays OX=4577 GN=100216551 PE=2 SV=1;tr|B4FXB2|B4FXB2_MAIZE Histone H2A OS=Zea mays OX=4577 GN=100273753 PE=2 SV=1;tr|A0A1D6MEL9|A0A1D6MEL9_MAIZE Histone H2A OS=Zea mays OX=4577 GN=ZEAMMB73_Zm00001d039215 PE=3 SV=1;	2.6871	29.2	2	3	22.1991	NaN	NaN	NaN	22.3177	24.2246	22.2934	21.8975	NaN	NaN	NaN	NaN	NaN	NaN	NaN	NaN		binding;DNA binding;nucleic acid binding	cell part;chromosomal part;intracellular membrane-bounded organelle;intracellular organelle;intracellular organelle part;intracellular part;macromolecular complex;membrane-bounded organelle;nucleosome;nucleus;organelle;organelle part;protein-DNA complex	2	22.6	22.6	14.473	145340000	14
tr|A0A1D6LDB6|A0A1D6LDB6_MAIZE Acyl-CoA N-acyltransferase (NAT) superfamily protein OS=Zea mays OX=4577 GN=ZEAMMB73_Zm00001d034969 PE=4 SV=1	5.6638	29.6	4	4	NaN	NaN	NaN	NaN	NaN	NaN	NaN	NaN	23.8215	NaN	23.2274	23.3008	NaN	NaN	24.8756	NaN				4	29.6	29.6	21.475	100430000	8
tr|B4FHA5|B4FHA5_MAIZE Pre-mRNA processing ribonucleoprotein binding region-containing protein OS=Zea mays OX=4577 GN=100194058 PE=2 SV=1;tr|A0A1D6E3T2|A0A1D6E3T2_MAIZE Pre-mRNA processing ribonucleoprotein binding region-containing protein OS=Zea mays OX=	10.82	23.1	7	7	NaN	NaN	NaN	NaN	NaN	NaN	23.4247	NaN	NaN	NaN	NaN	NaN	NaN	NaN	NaN	NaN	assembly of spliceosomal tri-snRNP;cellular component assembly;cellular component assembly at cellular level;cellular component organization;cellular component organization at cellular level;cellular component organization or biogenesis;cellular component organization or biogenesis at cellular level;cellular macromolecular complex assembly;cellular macromolecular complex subunit organization;cell…		cell part;intracellular organelle part;intracellular part;macromolecular complex;nuclear part;organelle part;ribonucleoprotein complex;small nuclear ribonucleoprotein complex;U4/U6 x U5 tri-snRNP complex	7	23.1	23.1	52.833	251570000	14
tr|B4FHE4|B4FHE4_MAIZE 60S ribosomal protein L17-2 OS=Zea mays OX=4577 GN=100194089 PE=2 SV=1;tr|B6T8W9|B6T8W9_MAIZE 60S ribosomal protein L17 OS=Zea mays OX=4577 GN=100194089 PE=2 SV=1;tr|A0A1D6M052|A0A1D6M052_MAIZE 60S ribosomal protein L17-2 OS=Zea mays	17.518	74.9	1	17	NaN	NaN	NaN	NaN	NaN	NaN	NaN	NaN	NaN	NaN	NaN	NaN	NaN	22.5592	NaN	NaN	biosynthetic process;cellular biosynthetic process;cellular macromolecule biosynthetic process;cellular macromolecule metabolic process;cellular metabolic process;cellular process;cellular protein metabolic process;macromolecule biosynthetic process;macromolecule metabolic process;metabolic process;primary metabolic process;protein metabolic process;translation	structural constituent of ribosome;structural molecule activity	cell part;intracellular organelle part;intracellular part;large ribosomal subunit;macromolecular complex;organelle part;ribonucleoprotein complex	3	14	7	19.392	28549000	6
tr|B4FHJ2|B4FHJ2_MAIZE Xylose isomerase OS=Zea mays OX=4577 GN=100194128 PE=2 SV=1;tr|A0A1D6ING2|A0A1D6ING2_MAIZE Xylose isomerase OS=Zea mays OX=4577 GN=100194128 PE=3 SV=1;tr|A0A1D6L698|A0A1D6L698_MAIZE Xylose isomerase OS=Zea mays OX=4577 GN=ZEAMMB73_Zm	137.38	51.7	4	18	24.1068	23.0937	NaN	NaN	NaN	NaN	NaN	NaN	NaN	NaN	NaN	NaN	NaN	NaN	23.3457	NaN	alcohol catabolic process;alcohol metabolic process;carbohydrate catabolic process;carbohydrate metabolic process;catabolic process;cellular carbohydrate catabolic process;cellular carbohydrate metabolic process;cellular metabolic process;cellular nitrogen compound metabolic process;cellular process;coenzyme metabolic process;cofactor metabolic process;D-xylose metabolic process;glucose catabolic…	binding;catalytic activity;cation binding;intramolecular oxidoreductase activity;intramolecular oxidoreductase activity, interconverting aldoses and ketoses;ion binding;isomerase activity;metal ion binding;xylose isomerase activity		6	21.1	15.1	53.987	576000000	23
tr|B4FHT6|B4FHT6_MAIZE Ran BP2/NZF zinc finger-like superfamily protein OS=Zea mays OX=4577 GN=100194201 PE=2 SV=1	97.688	39.2	3	6	NaN	22.2843	NaN	22.7058	NaN	NaN	NaN	21.9344	NaN	22.3767	22.5968	NaN	NaN	NaN	NaN	NaN		binding;cation binding;ion binding;metal ion binding;transition metal ion binding;zinc ion binding		3	22.3	22.3	17.804	308550000	17
tr|B4FI96|B4FI96_MAIZE XS domain containing protein expressed OS=Zea mays OX=4577 GN=100194318 PE=2 SV=1	43.59	17.2	5	5	23.0239	22.4683	NaN	22.2184	NaN	NaN	NaN	NaN	NaN	NaN	NaN	NaN	NaN	NaN	NaN	NaN	biological regulation;cellular process;gene silencing;gene silencing by RNA;negative regulation of biological process;negative regulation of gene expression;negative regulation of macromolecule metabolic process;negative regulation of metabolic process;regulation of biological process;regulation of gene expression;regulation of macromolecule metabolic process;regulation of metabolic process			5	17.2	17.2	50.752	152220000	20
tr|B4FIG6|B4FIG6_MAIZE Transferase OS=Zea mays OX=4577 GN=100194375 PE=2 SV=1;tr|A0A1D6KXV7|A0A1D6KXV7_MAIZE Transferase OS=Zea mays OX=4577 GN=100194375 PE=4 SV=1;tr|A0A1D6KXW0|A0A1D6KXW0_MAIZE Transferase OS=Zea mays OX=4577 GN=100194375 PE=4 SV=1;tr|A0A	5.9042	13.2	4	4	NaN	NaN	NaN	NaN	NaN	NaN	23.3448	NaN	NaN	NaN	NaN	NaN	NaN	NaN	NaN	NaN				4	13.2	13.2	49.076	157930000	6
tr|B4FII0|B4FII0_MAIZE Shikimate O-hydroxycinnamoyltransferase OS=Zea mays OX=4577 GN=100194386 PE=2 SV=1	94.113	22.2	7	7	NaN	25.0608	25.371	NaN	NaN	NaN	NaN	NaN	NaN	NaN	23.8195	25.1582	NaN	NaN	24.7464	24.4234		catalytic activity;transferase activity;transferase activity, transferring acyl groups;transferase activity, transferring acyl groups other than amino-acyl groups		7	22.2	22.2	48.621	1378800000	75
tr|B4FIW6|B4FIW6_MAIZE Serine racemase OS=Zea mays OX=4577 GN=100216615 PE=2 SV=1;tr|A0A1D6E3N1|A0A1D6E3N1_MAIZE Serine racemase OS=Zea mays OX=4577 GN=100216615 PE=4 SV=1	13.702	11.8	2	2	NaN	22.8727	NaN	NaN	NaN	NaN	NaN	NaN	NaN	NaN	NaN	NaN	NaN	NaN	NaN	NaN	amine metabolic process;carboxylic acid metabolic process;cellular amine metabolic process;cellular amino acid metabolic process;cellular ketone metabolic process;cellular metabolic process;cellular nitrogen compound metabolic process;cellular process;D-serine metabolic process;L-serine metabolic process;metabolic process;nitrogen compound metabolic process;organic acid metabolic process;oxoacid …	amino-acid racemase activity;catalytic activity;isomerase activity;racemase and epimerase activity;racemase and epimerase activity, acting on amino acids and derivatives;serine racemase activity		2	11.8	11.8	35.757	91969000	11
tr|B4FJ16|B4FJ16_MAIZE Succinate dehydrogenase [ubiquinone] iron-sulfur subunit, mitochondrial OS=Zea mays OX=4577 GN=100216648 PE=2 SV=1;tr|A0A1D6LEN4|A0A1D6LEN4_MAIZE Succinate dehydrogenase [ubiquinone] iron-sulfur subunit, mitochondrial OS=Zea mays OX=	119.79	58.4	4	16	NaN	NaN	NaN	NaN	NaN	NaN	NaN	NaN	NaN	NaN	NaN	23.1558	NaN	NaN	NaN	22.9503	acetyl-CoA catabolic process;acetyl-CoA metabolic process;catabolic process;cellular catabolic process;cellular metabolic process;cellular process;coenzyme catabolic process;coenzyme metabolic process;cofactor catabolic process;cofactor metabolic process;metabolic process;tricarboxylic acid cycle	2 iron, 2 sulfur cluster binding;3 iron, 4 sulfur cluster binding;4 iron, 4 sulfur cluster binding;binding;catalytic activity;cation binding;electron carrier activity;ion binding;iron-sulfur cluster binding;metal cluster binding;metal ion binding;oxidoreductase activity;oxidoreductase activity, acting on the CH-CH group of donors;oxidoreductase activity, acting on the CH-CH group of donors, quino…	cell part;cytoplasmic part;intracellular organelle part;intracellular part;membrane;mitochondrial inner membrane;mitochondrial membrane;mitochondrial part;organelle inner membrane;organelle membrane;organelle part	16	58.4	22.1	31.159	233470000	16
tr|B4FJM6|B4FJM6_MAIZE Lactoylglutathione lyase / glyoxalase I family protein OS=Zea mays OX=4577 GN=ZEAMMB73_Zm00001d033468 PE=2 SV=1	167.85	41.5	4	4	25.6912	24.8602	24.6095	NaN	NaN	25.0774	NaN	NaN	24.5437	NaN	NaN	24.2251	NaN	NaN	NaN	NaN				4	41.5	41.5	15.233	688390000	50
tr|B4FK58|B4FK58_MAIZE Signal recognition particle 19 kDa protein OS=Zea mays OX=4577 GN=103645776 PE=2 SV=1;tr|A0A1D6DTZ0|A0A1D6DTZ0_MAIZE Signal recognition particle 19 kDa protein OS=Zea mays OX=4577 GN=103645776 PE=4 SV=1	7.2156	21.9	3	3	NaN	NaN	NaN	NaN	NaN	NaN	NaN	NaN	23.2626	NaN	NaN	22.8199	NaN	NaN	22.914	NaN	cotranslational protein targeting to membrane;establishment of localization;establishment of localization in cell;establishment of protein localization;establishment of protein localization in endoplasmic reticulum;establishment of protein localization to organelle;intracellular protein transport;intracellular transport;protein targeting;protein targeting to ER;protein targeting to membrane;prote…	7S RNA binding;binding;nucleic acid binding;RNA binding	cell part;cytoplasmic part;intracellular part;macromolecular complex;ribonucleoprotein complex;signal recognition particle	3	21.9	21.9	16.06	101550000	12
tr|B4FK84|B4FK84_MAIZE Glutathione S-transferase 3 OS=Zea mays OX=4577 GN=541990 PE=2 SV=1	11.594	46.2	3	8	NaN	23.6246	23.4675	NaN	NaN	NaN	NaN	NaN	NaN	NaN	NaN	23.8335	NaN	NaN	NaN	NaN				8	46.2	16.3	23.894	133600000	24
tr|B4FKG5|B4FKG5_MAIZE Abscisic acid stress ripening1 OS=Zea mays OX=4577 GN=542304 PE=2 SV=1	18.82	83.3	7	13	25.3293	NaN	23.8093	NaN	NaN	NaN	NaN	25.3402	NaN	NaN	NaN	NaN	NaN	NaN	NaN	NaN	response to stimulus;response to stress			7	59.4	59.4	15.543	685700000	15
tr|B4FKN3|B4FKN3_MAIZE DNA-binding protein HEXBP OS=Zea mays OX=4577 GN=100216951 PE=2 SV=1;tr|K7VLF5|K7VLF5_MAIZE Zinc knuckle (CCHC-type) family protein OS=Zea mays OX=4577 GN=100216951 PE=4 SV=1;tr|B4FLG4|B4FLG4_MAIZE DNA-binding protein HEXBP OS=Zea ma	6.0364	32.2	5	5	NaN	NaN	NaN	NaN	NaN	NaN	NaN	NaN	23.442	NaN	NaN	23.0761	NaN	NaN	NaN	NaN		binding;cation binding;DNA binding;ion binding;metal ion binding;nucleic acid binding;transition metal ion binding;zinc ion binding		5	32.2	32.2	28.394	185320000	13
tr|B4FKV6|B4FKV6_MAIZE Peroxidase OS=Zea mays OX=4577 GN=100216995 PE=2 SV=1	7.8249	14	4	4	23.6703	23.7003	NaN	NaN	22.3508	26.8565	21.9663	22.6725	NaN	NaN	NaN	NaN	NaN	NaN	NaN	NaN	response to chemical stimulus;response to oxidative stress;response to stimulus;response to stress	antioxidant activity;binding;catalytic activity;cation binding;heme binding;ion binding;iron ion binding;metal ion binding;oxidoreductase activity;oxidoreductase activity, acting on peroxide as acceptor;peroxidase activity;tetrapyrrole binding;transition metal ion binding		4	14	14	36.201	177460000	14
tr|B4FL49|B4FL49_MAIZE Nascent polypeptide-associated complex subunit beta OS=Zea mays OX=4577 GN=100284372 PE=2 SV=1	323.31	80.6	4	14	26.7653	25.901	26.0888	NaN	NaN	NaN	NaN	NaN	NaN	NaN	26.1971	25.636	NaN	26.2765	26.3866	25.5418	biological regulation;biosynthetic process;cellular biosynthetic process;cellular macromolecule biosynthetic process;cellular macromolecule metabolic process;cellular metabolic process;cellular nitrogen compound metabolic process;cellular process;macromolecule biosynthetic process;macromolecule metabolic process;metabolic process;nitrogen compound metabolic process;nucleic acid metabolic process;…			14	80.6	43.6	17.74	1627700000	60
tr|A0A1D6MS70|A0A1D6MS70_MAIZE Protein translocase subunit SECA1 chloroplastic OS=Zea mays OX=4577 GN=ZEAMMB73_Zm00001d040686 PE=3 SV=1	257.43	35.8	38	39	25.9903	26.4533	26.7712	26.8653	27.7562	28.3063	29.9609	28.2277	27.0544	27.3198	26.9869	26.6245	28.2734	29.1201	27.1224	27.6154				39	35.8	34.2	126.45	3369700000	175
tr|B4FL93|B4FL93_MAIZE GDSL esterase/lipase LIP-4 OS=Zea mays OX=4577 GN=100217075 PE=2 SV=1;tr|A0A1D6MSG3|A0A1D6MSG3_MAIZE GDSL esterase/lipase LIP-4 OS=Zea mays OX=4577 GN=100217075 PE=4 SV=1	27.425	12.8	2	2	NaN	NaN	NaN	NaN	NaN	NaN	NaN	25.3247	NaN	NaN	NaN	NaN	NaN	NaN	NaN	NaN		catalytic activity;hydrolase activity;hydrolase activity, acting on ester bonds		2	12.8	12.8	40.513	147000000	5
tr|B4FLF6|B4FLF6_MAIZE DNA-damage-repair/toleration protein DRT111 chloroplastic OS=Zea mays OX=4577 GN=ZEAMMB73_Zm00001d020765 PE=2 SV=1;tr|K7W6D2|K7W6D2_MAIZE Splicing factor 45 OS=Zea mays OX=4577 GN=ZEAMMB73_Zm00001d045282 PE=4 SV=1	9.5442	26.4	8	8	22.8444	NaN	NaN	22.851	NaN	NaN	22.7535	22.8404	NaN	NaN	NaN	NaN	NaN	NaN	NaN	NaN		binding;nucleic acid binding;nucleotide binding		8	26.4	26.4	41.987	150040000	25
tr|B4FMB1|B4FMB1_MAIZE DUF538 family protein OS=Zea mays OX=4577 GN=100276213 PE=2 SV=1	6.721	38.5	4	4	NaN	23.9473	NaN	NaN	NaN	NaN	NaN	NaN	NaN	NaN	23.8069	25.5912	NaN	NaN	24.4145	NaN				4	38.5	38.5	17.453	174300000	17
tr|B4FMR1|B4FMR1_MAIZE Arginine--tRNA ligase chloroplastic/mitochondrial OS=Zea mays OX=4577 GN=100281742 PE=2 SV=1;tr|A0A1D6FU93|A0A1D6FU93_MAIZE Arginine--tRNA ligase chloroplastic/mitochondrial OS=Zea mays OX=4577 GN=100281742 PE=3 SV=1;tr|A0A1D6FU96|A0	19.089	35.1	2	18	NaN	NaN	NaN	NaN	NaN	NaN	NaN	NaN	NaN	NaN	NaN	NaN	NaN	NaN	NaN	23.0961	amine metabolic process;amino acid activation;arginyl-tRNA aminoacylation;carboxylic acid metabolic process;cellular amine metabolic process;cellular amino acid metabolic process;cellular ketone metabolic process;cellular macromolecule metabolic process;cellular metabolic process;cellular nitrogen compound metabolic process;cellular process;macromolecule metabolic process;metabolic process;ncRNA …	adenyl nucleotide binding;adenyl ribonucleotide binding;aminoacyl-tRNA ligase activity;arginine-tRNA ligase activity;ATP binding;binding;catalytic activity;ligase activity;ligase activity, forming aminoacyl-tRNA and related compounds;ligase activity, forming carbon-oxygen bonds;nucleotide binding;purine nucleotide binding;purine ribonucleoside triphosphate binding;purine ribonucleotide binding;ri…	cell part;cytoplasm;intracellular part	2	6	6	68.015	70061000	13
tr|Q9M589|Q9M589_MAIZE Prohibitin OS=Zea mays OX=4577 GN=PHB1 PE=2 SV=1;tr|B4FMS7|B4FMS7_MAIZE Mitochondrial prohibitin complex protein 2 OS=Zea mays OX=4577 GN=541818 PE=2 SV=1	2.3245	11.1	2	2	NaN	21.6523	NaN	NaN	NaN	22.5681	NaN	NaN	21.5364	NaN	NaN	NaN	NaN	NaN	NaN	NaN			cell part;membrane	2	11.1	11.1	32.079	16525000	3
tr|B4FMX6|B4FMX6_MAIZE Thioredoxin reductase OS=Zea mays OX=4577 GN=100284045 PE=2 SV=1	16.537	24.6	3	4	NaN	NaN	NaN	NaN	NaN	NaN	NaN	NaN	NaN	NaN	NaN	24.0857	23.9877	NaN	NaN	NaN	cellular metabolic process;cellular process;cellular response to chemical stimulus;cellular response to oxidative stress;cellular response to oxygen radical;cellular response to reactive oxygen species;cellular response to stimulus;cellular response to stress;cellular response to superoxide;metabolic process;reactive oxygen species metabolic process;removal of superoxide radicals;response to chem…	antioxidant activity;binding;catalytic activity;coenzyme binding;cofactor binding;flavin adenine dinucleotide binding;oxidoreductase activity;oxidoreductase activity, acting on a sulfur group of donors;oxidoreductase activity, acting on a sulfur group of donors, NAD or NADP as acceptor;oxidoreductase activity, acting on NADH or NADPH;thioredoxin-disulfide reductase activity	cell part;cytoplasm;intracellular part	3	20.3	20.3	38.522	337410000	15
tr|B4FN96|B4FN96_MAIZE Growth-regulating factor 9 OS=Zea mays OX=4577 GN=ZEAMMB73_Zm00001d006348 PE=2 SV=1;sp|A5HEG9|GRF10_MAIZE GRF-interacting factor 10 OS=Zea mays OX=4577 GN=GRF10 PE=1 SV=1	4.8093	14.7	3	3	NaN	22.1907	NaN	NaN	NaN	NaN	NaN	NaN	NaN	NaN	NaN	NaN	NaN	NaN	NaN	NaN	biological regulation;regulation of biological process;regulation of biosynthetic process;regulation of cellular biosynthetic process;regulation of cellular macromolecule biosynthetic process;regulation of cellular metabolic process;regulation of cellular process;regulation of gene expression;regulation of macromolecule biosynthetic process;regulation of macromolecule metabolic process;regulation…	adenyl nucleotide binding;adenyl ribonucleotide binding;ATP binding;binding;catalytic activity;hydrolase activity;hydrolase activity, acting on acid anhydrides;hydrolase activity, acting on acid anhydrides, in phosphorus-containing anhydrides;nucleotide binding;purine nucleotide binding;purine ribonucleoside triphosphate binding;purine ribonucleotide binding;ribonucleotide binding	cell part;intracellular membrane-bounded organelle;intracellular organelle;intracellular part;membrane-bounded organelle;nucleus;organelle	3	14.7	14.7	28.637	126460000	19
tr|B4FP72|B4FP72_MAIZE Protein FLC EXPRESSOR OS=Zea mays OX=4577 GN=100272540 PE=2 SV=1;tr|A0A1D6GEP6|A0A1D6GEP6_MAIZE Protein FLC EXPRESSOR OS=Zea mays OX=4577 GN=100272540 PE=4 SV=1	7.9972	34.1	3	7	23.3275	NaN	NaN	NaN	NaN	24.9433	NaN	NaN	24.5121	NaN	NaN	23.709	NaN	NaN	NaN	NaN				3	17.6	17.6	34.899	293870000	18
tr|B4FPA0|B4FPA0_MAIZE Alpha/beta-Hydrolases superfamily protein OS=Zea mays OX=4577 GN=100272558 PE=2 SV=1;tr|A0A1D6M3P2|A0A1D6M3P2_MAIZE Alpha/beta-Hydrolases superfamily protein OS=Zea mays OX=4577 GN=100272558 PE=4 SV=1;tr|A0A1D6M3P0|A0A1D6M3P0_MAIZE A	4.1883	16.7	3	4	NaN	NaN	22.2212	NaN	NaN	NaN	NaN	NaN	NaN	NaN	21.4833	NaN	NaN	NaN	21.9998	NaN		catalytic activity;hydrolase activity		4	16.7	12.9	25.728	90853000	6
tr|B4FPA3|B4FPA3_MAIZE HXXXD-type acyl-transferase family protein OS=Zea mays OX=4577 GN=100272560 PE=2 SV=1	1.7525	5.5	2	2	NaN	NaN	NaN	NaN	NaN	NaN	NaN	NaN	NaN	NaN	NaN	NaN	NaN	NaN	NaN	19.3305		catalytic activity;transferase activity;transferase activity, transferring acyl groups;transferase activity, transferring acyl groups other than amino-acyl groups		2	5.5	5.5	48.559	4779900	2
tr|B4FQ56|B4FQ56_MAIZE Diaminopimelate epimerase chloroplastic OS=Zea mays OX=4577 GN=100273435 PE=2 SV=1;tr|B4FVI8|B4FVI8_MAIZE Diaminopimelate epimerase chloroplastic OS=Zea mays OX=4577 GN=100273435 PE=2 SV=1;tr|A0A1D6MWY7|A0A1D6MWY7_MAIZE Diaminopimela	20.01	40.9	3	8	NaN	23.1082	23.0464	NaN	NaN	NaN	NaN	NaN	NaN	NaN	NaN	NaN	NaN	NaN	NaN	NaN	amine biosynthetic process;amine metabolic process;aspartate family amino acid biosynthetic process;aspartate family amino acid metabolic process;biosynthetic process;carboxylic acid biosynthetic process;carboxylic acid metabolic process;cellular amine metabolic process;cellular amino acid biosynthetic process;cellular amino acid metabolic process;cellular biosynthetic process;cellular ketone met…	amino-acid racemase activity;catalytic activity;diaminopimelate epimerase activity;isomerase activity;racemase and epimerase activity;racemase and epimerase activity, acting on amino acids and derivatives	cell part;cytoplasm;intracellular part	3	16.2	16.2	33.449	204140000	14
tr|B6SJ13|B6SJ13_MAIZE 40S ribosomal protein S15a OS=Zea mays OX=4577 GN=100280584 PE=2 SV=1;tr|B4FQ61|B4FQ61_MAIZE 40S ribosomal protein S15a OS=Zea mays OX=4577 GN=100280177 PE=2 SV=1	9.9147	50	2	7	NaN	NaN	NaN	NaN	NaN	NaN	NaN	NaN	26.201	NaN	NaN	NaN	NaN	NaN	NaN	NaN	biosynthetic process;cellular biosynthetic process;cellular macromolecule biosynthetic process;cellular macromolecule metabolic process;cellular metabolic process;cellular process;cellular protein metabolic process;macromolecule biosynthetic process;macromolecule metabolic process;metabolic process;primary metabolic process;protein metabolic process;translation	structural constituent of ribosome;structural molecule activity	cell part;cytoplasmic part;intracellular non-membrane-bounded organelle;intracellular organelle;intracellular part;macromolecular complex;non-membrane-bounded organelle;organelle;ribonucleoprotein complex;ribosome	7	50	19.2	14.79	114470000	3
tr|B4FQ71|B4FQ71_MAIZE Uncharacterized protein OS=Zea mays OX=4577 GN=100272723 PE=2 SV=1	95.214	48.1	13	23	25.7591	24.7983	24.8097	NaN	NaN	25.0542	NaN	NaN	24.0635	NaN	NaN	24.04	NaN	NaN	NaN	NaN				23	48.1	34.2	59.731	1075800000	101
tr|B4FQD9|B4FQD9_MAIZE THO complex subunit 4B OS=Zea mays OX=4577 GN=100272743 PE=2 SV=1;tr|A0A1D6PDH2|A0A1D6PDH2_MAIZE THO complex subunit 4B OS=Zea mays OX=4577 GN=100272743 PE=4 SV=1	4.7432	52.7	4	10	NaN	NaN	NaN	23.3972	23.1338	NaN	NaN	NaN	NaN	22.5719	22.9745	22.3267	NaN	NaN	NaN	NaN		binding;nucleic acid binding;nucleotide binding		4	36.2	36.2	23.729	259250000	19
tr|B4FQP1|B4FQP1_MAIZE NAD(P)-binding Rossmann-fold superfamily protein OS=Zea mays OX=4577 GN=100500950 PE=2 SV=1	71.64	13.4	3	3	NaN	23.6515	NaN	NaN	NaN	NaN	NaN	NaN	NaN	NaN	NaN	23.4777	NaN	NaN	NaN	NaN		catalytic activity;oxidoreductase activity		3	13.4	13.4	34.683	43195000	3
tr|B4FR02|B4FR02_MAIZE PITH domain-containing protein OS=Zea mays OX=4577 GN=100282808 PE=2 SV=1;tr|A0A1D6L7K8|A0A1D6L7K8_MAIZE PITH domain-containing protein OS=Zea mays OX=4577 GN=100282808 PE=4 SV=1;tr|A0A1D6L7K4|A0A1D6L7K4_MAIZE PITH domain-containing	81.964	28.3	3	3	23.3972	23.7259	NaN	NaN	NaN	NaN	NaN	NaN	NaN	NaN	NaN	24.1497	NaN	NaN	NaN	NaN	biological regulation;cell redox homeostasis;cellular homeostasis;cellular process;glycerol ether metabolic process;homeostatic process;metabolic process;organic ether metabolic process;regulation of biological process;regulation of biological quality;regulation of cellular process;small molecule metabolic process	catalytic activity;disulfide oxidoreductase activity;oxidoreductase activity;oxidoreductase activity, acting on a sulfur group of donors;protein disulfide oxidoreductase activity		3	28.3	28.3	20.748	333900000	27
tr|B4FR31|B4FR31_MAIZE Leucine-rich repeat extensin-like protein 6 OS=Zea mays OX=4577 GN=100281253 PE=2 SV=1;tr|A0A1D6H6J4|A0A1D6H6J4_MAIZE Leucine-rich repeat extensin-like protein 6 OS=Zea mays OX=4577 GN=ZEAMMB73_Zm00001d016284 PE=4 SV=1;tr|A0A1D6HTF9|	136.86	12.6	3	4	NaN	NaN	NaN	NaN	NaN	23.4862	NaN	NaN	NaN	NaN	NaN	NaN	NaN	NaN	NaN	NaN		catalytic activity;kinase activity;transferase activity;transferase activity, transferring phosphorus-containing groups		4	12.6	10	41.374	146740000	25
tr|B4FR97|B4FR97_MAIZE Putative cinnamyl alcohol dehydrogenase 6 OS=Zea mays OX=4577 GN=100272868 PE=2 SV=1;tr|A0A1D6I3Z7|A0A1D6I3Z7_MAIZE Putative cinnamyl alcohol dehydrogenase 6 OS=Zea mays OX=4577 GN=100272868 PE=4 SV=1	10.155	11.8	3	3	NaN	NaN	NaN	NaN	NaN	NaN	NaN	NaN	NaN	NaN	NaN	NaN	NaN	NaN	NaN	23.8067		binding;catalytic activity;cation binding;ion binding;metal ion binding;oxidoreductase activity;transition metal ion binding;zinc ion binding		3	11.8	11.8	37.96	265420000	16
tr|B4FRG1|B4FRG1_MAIZE 14-3-3-like protein OS=Zea mays OX=4577 GN=542285 PE=2 SV=1;tr|A0A1D6F6I7|A0A1D6F6I7_MAIZE 14-3-3-like protein OS=Zea mays OX=4577 GN=542285 PE=3 SV=1;tr|A0A1D6F6I5|A0A1D6F6I5_MAIZE 14-3-3-like protein OS=Zea mays OX=4577 GN=542285 P	113.48	75.2	3	20	23.7491	24.6201	23.2849	NaN	NaN	24.8878	NaN	NaN	23.0519	NaN	NaN	NaN	NaN	NaN	NaN	NaN				13	59	18.8	29.314	304410000	27
tr|B4FRH7|B4FRH7_MAIZE UDP-N-acetylglucosamine diphosphorylase 2 OS=Zea mays OX=4577 GN=100282551 PE=2 SV=1;tr|A0A1D6JE35|A0A1D6JE35_MAIZE UDP-N-acetylglucosamine diphosphorylase 2 OS=Zea mays OX=4577 GN=100282551 PE=4 SV=1;tr|A0A1D6JE31|A0A1D6JE31_MAIZE U	5.9964	27.8	3	13	NaN	NaN	24.9598	NaN	NaN	NaN	NaN	NaN	NaN	NaN	NaN	NaN	NaN	NaN	NaN	NaN		catalytic activity;nucleotidyltransferase activity;transferase activity;transferase activity, transferring phosphorus-containing groups;uridylyltransferase activity		3	12.2	12.2	54.483	354840000	18
tr|B8A0F3|B8A0F3_MAIZE Hydroxymethylbutenyl diphosphate synthase1 OS=Zea mays OX=4577 GN=ZEAMMB73_Zm00001d017139 PE=2 SV=1;tr|A0A1D6HCJ3|A0A1D6HCJ3_MAIZE Hydroxymethylbutenyl diphosphate synthase1 OS=Zea mays OX=4577 GN=ZEAMMB73_Zm00001d017139 PE=3 SV=1;tr	271.12	49.1	31	31	24.9966	25.814	26.8569	26.0227	29.4864	25.5578	28.2512	29.3072	27.1348	28.4883	27.6183	27.7891	27.885	28.0275	26.6987	28.4534	alcohol catabolic process;alcohol metabolic process;amine biosynthetic process;amine catabolic process;amine metabolic process;aromatic amino acid family metabolic process;aromatic compound biosynthetic process;biological regulation;biosynthetic process;carbohydrate biosynthetic process;carbohydrate catabolic process;carbohydrate metabolic process;carboxylic acid biosynthetic process;carboxylic a…	4-hydroxy-3-methylbut-2-en-1-yl diphosphate synthase activity;binding;catalytic activity;cation binding;ion binding;iron ion binding;metal ion binding;oxidoreductase activity;oxidoreductase activity, acting on CH or CH2 groups;oxidoreductase activity, acting on CH or CH2 groups, with an iron-sulfur protein as acceptor;transition metal ion binding	cell part;chloroplast envelope;chloroplast part;cytoplasmic part;envelope;intracellular organelle part;intracellular part;organelle envelope;organelle part;plastid envelope;plastid part	31	49.1	49.1	82.204	3437700000	213
tr|A0A1D6JA02|A0A1D6JA02_MAIZE Triglyceride lipases OS=Zea mays OX=4577 GN=103641836 PE=4 SV=1;tr|A0A1D6JA03|A0A1D6JA03_MAIZE Triglyceride lipases OS=Zea mays OX=4577 GN=103641836 PE=4 SV=1;tr|A0A1D6JA01|A0A1D6JA01_MAIZE Triglyceride lipases OS=Zea mays OX	30.602	12.1	7	7	25.0817	22.238	NaN	24.267	NaN	NaN	25.4428	26.5409	23.3081	24.765	24.7351	23.1887	25.434	26.7446	24.8489	23.854				7	12.1	12.1	97.523	455630000	25
tr|B4FRS6|B4FRS6_MAIZE VIP1 protein OS=Zea mays OX=4577 GN=100282630 PE=2 SV=1	49.895	27.9	5	5	NaN	NaN	NaN	NaN	NaN	NaN	NaN	NaN	23.3762	NaN	NaN	NaN	NaN	NaN	NaN	NaN				5	27.9	27.9	25.59	179200000	23
tr|B4FRV1|B4FRV1_MAIZE Serine acetyltransferase1 OS=Zea mays OX=4577 GN=541958 PE=2 SV=1	3.9981	9.4	2	2	NaN	NaN	NaN	23.2035	NaN	NaN	NaN	NaN	22.9198	NaN	23.9889	NaN	23.2063	NaN	NaN	NaN	amine biosynthetic process;amine metabolic process;biosynthetic process;carboxylic acid biosynthetic process;carboxylic acid metabolic process;cellular amine metabolic process;cellular amino acid biosynthetic process;cellular amino acid metabolic process;cellular biosynthetic process;cellular ketone metabolic process;cellular metabolic process;cellular nitrogen compound biosynthetic process;cellu…	acetyltransferase activity;catalytic activity;O-acetyltransferase activity;O-acyltransferase activity;serine O-acetyltransferase activity;serine O-acyltransferase activity;transferase activity;transferase activity, transferring acyl groups;transferase activity, transferring acyl groups other than amino-acyl groups	cell part;cytoplasm;intracellular part	2	9.4	9.4	32.446	62654000	9
tr|B4FS90|B4FS90_MAIZE Cysteine protease 1 OS=Zea mays OX=4577 GN=100283826 PE=2 SV=1	290.18	24.3	4	9	NaN	NaN	NaN	NaN	NaN	NaN	NaN	NaN	NaN	NaN	NaN	NaN	23.8592	23.629	NaN	NaN		catalytic activity;cysteine-type peptidase activity;hydrolase activity;peptidase activity;peptidase activity, acting on L-amino acid peptides		9	24.3	12.6	50.227	2603500000	65
tr|B4FJK0|B4FJK0_MAIZE Histone H2A OS=Zea mays OX=4577 GN=100216750 PE=2 SV=1	35.68	30.6	2	8	NaN	NaN	NaN	NaN	NaN	NaN	25.5161	26.8517	24.3772	23.5063	23.7592	NaN	25.0185	25.2515	NaN	24.2637		binding;DNA binding;nucleic acid binding	cell part;chromosomal part;intracellular membrane-bounded organelle;intracellular organelle;intracellular organelle part;intracellular part;macromolecular complex;membrane-bounded organelle;nucleosome;nucleus;organelle;organelle part;protein-DNA complex	3	23.1	23.1	16.7	1617100000	48
tr|B4FSC5|B4FSC5_MAIZE Nucleic acid-binding OB-fold-like protein OS=Zea mays OX=4577 GN=100283737 PE=2 SV=1	19.49	51.2	1	6	23.4487	NaN	22.8479	NaN	NaN	NaN	NaN	NaN	NaN	NaN	NaN	NaN	NaN	23.5998	NaN	NaN				4	41.5	7.3	18.077	297730000	30
tr|B4FSF1|B4FSF1_MAIZE 26S protease regulatory subunit 8 homolog B OS=Zea mays OX=4577 GN=100273032 PE=2 SV=1;tr|A0A1D6H7L0|A0A1D6H7L0_MAIZE 26S protease regulatory subunit 8 homolog B OS=Zea mays OX=4577 GN=100273032 PE=3 SV=1;tr|A0A1D6QQY5|A0A1D6QQY5_MAI	36.23	74.6	2	26	24.8513	NaN	NaN	NaN	NaN	NaN	NaN	NaN	24.6537	24.3984	24.6859	25.3968	24.3342	NaN	24.467	24.6257	catabolic process;macromolecule catabolic process;macromolecule metabolic process;metabolic process;primary metabolic process;protein catabolic process;protein metabolic process	adenyl nucleotide binding;adenyl ribonucleotide binding;ATP binding;binding;catalytic activity;hydrolase activity;nucleotide binding;purine nucleotide binding;purine ribonucleoside triphosphate binding;purine ribonucleotide binding;ribonucleotide binding	cell part;cytoplasm;intracellular part	2	6.2	6.2	47.2	979860000	44
sp|B4FSG1|PSA3_MAIZE Photosystem I assembly factor PSA3, chloroplastic OS=Zea mays OX=4577 GN=PSA3 PE=2 SV=1	5.1782	8.2	2	2	NaN	NaN	NaN	NaN	NaN	NaN	NaN	NaN	24.9617	NaN	NaN	23.3498	NaN	NaN	NaN	NaN	biological regulation;biosynthetic process;carbohydrate biosynthetic process;carbohydrate metabolic process;cellular biosynthetic process;cellular carbohydrate biosynthetic process;cellular carbohydrate metabolic process;cellular component organization;cellular component organization or biogenesis;cellular glucan metabolic process;cellular macromolecule biosynthetic process;cellular macromolecule…		cell part;chloroplast envelope;chloroplast part;chloroplast stroma;cytoplasmic part;envelope;intracellular membrane-bounded organelle;intracellular organelle;intracellular organelle part;intracellular part;membrane-bounded organelle;mitochondrion;nucleus;organelle;organelle envelope;organelle part;plastid envelope;plastid part;plastid stroma	2	8.2	8.2	29.883	72675000	7
tr|B4FSU4|B4FSU4_MAIZE SOUL heme-binding family protein OS=Zea mays OX=4577 GN=100273098 PE=2 SV=1	21.632	38.3	8	8	24.7625	23.5229	NaN	NaN	NaN	24.4955	24.4912	NaN	NaN	NaN	NaN	24.7301	NaN	NaN	NaN	NaN				8	38.3	38.3	24.878	781960000	43
tr|B4FSW8|B4FSW8_MAIZE Grx_S17-glutaredoxin subgroup II OS=Zea mays OX=4577 GN=100283390 PE=2 SV=1	77.591	32.5	6	12	NaN	NaN	NaN	NaN	NaN	23.7348	NaN	NaN	NaN	NaN	NaN	NaN	NaN	NaN	NaN	NaN	biological regulation;cell redox homeostasis;cellular homeostasis;cellular process;homeostatic process;regulation of biological process;regulation of biological quality;regulation of cellular process	catalytic activity;disulfide oxidoreductase activity;electron carrier activity;oxidoreductase activity;oxidoreductase activity, acting on a sulfur group of donors;protein disulfide oxidoreductase activity		12	32.5	15.4	54.048	345120000	25
tr|B4FT32|B4FT32_MAIZE Diaminopimelate decarboxylase 2 chloroplastic OS=Zea mays OX=4577 GN=100273126 PE=2 SV=1	2.6028	28.7	2	12	NaN	NaN	24.7761	NaN	NaN	NaN	NaN	NaN	NaN	NaN	NaN	NaN	NaN	NaN	NaN	NaN	amine biosynthetic process;amine metabolic process;aspartate family amino acid biosynthetic process;aspartate family amino acid metabolic process;biosynthetic process;carboxylic acid biosynthetic process;carboxylic acid metabolic process;cellular amine metabolic process;cellular amino acid biosynthetic process;cellular amino acid metabolic process;cellular biosynthetic process;cellular ketone met…	carbon-carbon lyase activity;carboxy-lyase activity;catalytic activity;diaminopimelate decarboxylase activity;lyase activity		2	4.5	4.5	53.291	170320000	5
tr|B4FT54|B4FT54_MAIZE HSP40/DnaJ peptide-binding protein OS=Zea mays OX=4577 GN=ZEAMMB73_Zm00001d039000 PE=2 SV=1;tr|A0A1D6MCJ0|A0A1D6MCJ0_MAIZE HSP40/DnaJ peptide-binding protein OS=Zea mays OX=4577 GN=ZEAMMB73_Zm00001d039000 PE=4 SV=1	5.6079	51.9	5	9	NaN	NaN	NaN	NaN	NaN	NaN	NaN	NaN	NaN	25.1842	NaN	NaN	NaN	NaN	NaN	25.2095	cellular macromolecule metabolic process;cellular metabolic process;cellular process;cellular protein metabolic process;macromolecule metabolic process;metabolic process;primary metabolic process;protein folding;protein metabolic process			5	42	42	38.651	488100000	8
tr|B4FUA0|B4FUA0_MAIZE ZPR1 zinc-finger domain protein OS=Zea mays OX=4577 GN=100273287 PE=2 SV=1;tr|A0A1D6L5J3|A0A1D6L5J3_MAIZE ZPR1 zinc-finger domain protein OS=Zea mays OX=4577 GN=100273287 PE=4 SV=1;tr|A0A1D6L5I6|A0A1D6L5I6_MAIZE ZPR1 zinc-finger doma	6.8766	14.1	5	5	NaN	NaN	NaN	NaN	NaN	NaN	NaN	NaN	NaN	23.0973	NaN	NaN	NaN	NaN	NaN	NaN		binding;cation binding;ion binding;metal ion binding;transition metal ion binding;zinc ion binding		5	14.1	14.1	54.222	201130000	16
tr|B4FUA1|B4FUA1_MAIZE Chlorophyll a-b binding protein, chloroplastic OS=Zea mays OX=4577 GN=542530 PE=2 SV=1	33.734	72.8	1	13	25.2621	NaN	NaN	NaN	NaN	NaN	NaN	NaN	NaN	NaN	NaN	NaN	NaN	NaN	NaN	NaN	cellular macromolecule metabolic process;cellular metabolic process;cellular process;cellular protein metabolic process;generation of precursor metabolites and energy;macromolecule metabolic process;macromolecule modification;metabolic process;photosynthesis, light harvesting;primary metabolic process;protein metabolic process;protein modification process;protein-chromophore linkage	binding;cation binding;chlorophyll binding;ion binding;metal ion binding;tetrapyrrole binding	cell part;chloroplast;cytoplasmic part;integral to membrane;intracellular membrane-bounded organelle;intracellular organelle;intracellular part;intrinsic to membrane;macromolecular complex;membrane part;membrane-bounded organelle;organelle;photosystem;photosystem I;photosystem II;plastid;protein complex;thylakoid part	7	51.3	14.7	27.997	69681000	1
tr|B6T4N9|B6T4N9_MAIZE Nucleic acid binding protein OS=Zea mays OX=4577 GN=ZEAMMB73_Zm00001d025551 PE=2 SV=1;tr|B4FUH4|B4FUH4_MAIZE Polyadenylate-binding protein RBP47B OS=Zea mays OX=4577 GN=ZEAMMB73_Zm00001d025551 PE=2 SV=1;tr|A0A1D6J7R1|A0A1D6J7R1_MAIZE	30.282	35.8	7	11	22.4082	NaN	NaN	NaN	NaN	NaN	NaN	NaN	NaN	NaN	NaN	NaN	NaN	NaN	NaN	NaN		binding;nucleic acid binding;nucleotide binding		11	35.8	27.4	40.077	307740000	48
tr|B4FUK9|B4FUK9_MAIZE COP9 signalosome complex subunit 5b OS=Zea mays OX=4577 GN=100283276 PE=2 SV=1;tr|A0A1D6DVR7|A0A1D6DVR7_MAIZE COP9 signalosome complex subunit 5b OS=Zea mays OX=4577 GN=100283276 PE=4 SV=1;tr|A0A1D6DVR5|A0A1D6DVR5_MAIZE COP9 signalos	44.005	41.4	8	8	22.9788	22.989	22.9975	NaN	NaN	NaN	NaN	NaN	NaN	NaN	NaN	23.598	NaN	NaN	NaN	NaN				8	41.4	41.4	40.13	278270000	34
tr|B8A0S8|B8A0S8_MAIZE Eukaryotic aspartyl protease family protein OS=Zea mays OX=4577 GN=100279940 PE=2 SV=1	129.72	29.5	11	11	NaN	NaN	NaN	NaN	NaN	NaN	NaN	NaN	NaN	NaN	24.8453	NaN	26.194	NaN	NaN	NaN		aspartic-type endopeptidase activity;aspartic-type peptidase activity;catalytic activity;endopeptidase activity;hydrolase activity;peptidase activity;peptidase activity, acting on L-amino acid peptides		11	29.5	29.5	46.609	13921000000	130
tr|B4FVL1|B4FVL1_MAIZE 26S proteasome non-ATPase regulatory subunit 6 OS=Zea mays OX=4577 GN=100282303 PE=2 SV=1;tr|A0A1D6HCE3|A0A1D6HCE3_MAIZE 26S proteasome non-ATPase regulatory subunit 6-like protein OS=Zea mays OX=4577 GN=100282303 PE=4 SV=1;tr|B6T9G1	10.575	24.7	8	8	NaN	NaN	NaN	22.6232	NaN	NaN	NaN	NaN	NaN	NaN	22.5153	NaN	NaN	NaN	NaN	NaN			cell part;intracellular part;macromolecular complex;proteasome complex;protein complex	8	24.7	24.7	44.27	291830000	27
tr|B4FWP1|B4FWP1_MAIZE THO complex subunit 4C OS=Zea mays OX=4577 GN=100280336 PE=2 SV=1	3.9437	4.9	2	2	NaN	NaN	NaN	NaN	NaN	NaN	NaN	NaN	23.4367	22.8264	22.922	22.3074	23.3795	NaN	NaN	NaN		binding;nucleic acid binding;nucleotide binding		2	4.9	4.9	33.073	178890000	30
tr|B4FWS6|B4FWS6_MAIZE Putative carboxylesterase 8 OS=Zea mays OX=4577 GN=100273650 PE=2 SV=1	5.7396	24	6	6	NaN	NaN	NaN	NaN	NaN	NaN	NaN	NaN	NaN	NaN	NaN	24.091	NaN	NaN	NaN	24.0024		catalytic activity;hydrolase activity		6	24	24	34.564	294090000	12
tr|B4FWV7|B4FWV7_MAIZE NAD(P)-binding Rossmann-fold superfamily protein OS=Zea mays OX=4577 GN=ZEAMMB73_Zm00001d053067 PE=2 SV=1	41.197	8.2	2	2	NaN	22.4754	23.3467	NaN	NaN	NaN	NaN	NaN	NaN	NaN	NaN	23.4011	NaN	NaN	NaN	NaN		catalytic activity;oxidoreductase activity		2	8.2	8.2	39.76	27681000	5
tr|B4FYF0|B4FYF0_MAIZE SH3 domain-containing protein 2 OS=Zea mays OX=4577 GN=100273976 PE=2 SV=1	4.6537	16.6	3	6	NaN	23.038	NaN	NaN	NaN	NaN	NaN	22.759	NaN	NaN	NaN	NaN	NaN	NaN	NaN	NaN				3	9.2	9.2	41.078	153540000	12
tr|B4FZ10|B4FZ10_MAIZE Dolichyl-diphosphooligosaccharide--protein glycosyltransferase 48 kDa subunit OS=Zea mays OX=4577 GN=100274092 PE=2 SV=1;tr|A0A1D6HVY7|A0A1D6HVY7_MAIZE Dolichyl-diphosphooligosaccharide--protein glycosyltransferase 48 kDa subunit OS=	80.814	35	4	13	NaN	NaN	NaN	NaN	NaN	NaN	NaN	NaN	NaN	NaN	NaN	NaN	NaN	NaN	23.3033	23.442	carbohydrate metabolic process;cellular carbohydrate metabolic process;cellular macromolecule metabolic process;cellular metabolic process;cellular process;cellular protein metabolic process;glycosylation;macromolecule glycosylation;macromolecule metabolic process;macromolecule modification;metabolic process;peptidyl-amino acid modification;peptidyl-asparagine modification;primary metabolic proce…	catalytic activity;dolichyl-diphosphooligosaccharide-protein glycotransferase activity;oligosaccharyl transferase activity;transferase activity;transferase activity, transferring glycosyl groups;transferase activity, transferring hexosyl groups	cell part;cytoplasmic part;endoplasmic reticulum membrane;endoplasmic reticulum part;integral to membrane;intracellular organelle part;intracellular part;intrinsic to membrane;membrane;membrane part;organelle membrane;organelle part	13	35	12.5	48.912	574220000	62
tr|B4FZ14|B4FZ14_MAIZE Protein CHLORORESPIRATORY REDUCTION 6 chloroplastic OS=Zea mays OX=4577 GN=100274094 PE=2 SV=1;tr|K7U0X6|K7U0X6_MAIZE Protein CHLORORESPIRATORY REDUCTION 6 chloroplastic OS=Zea mays OX=4577 GN=100274094 PE=4 SV=1	23.219	17.4	3	3	NaN	24.8259	24.0727	NaN	NaN	25.3768	NaN	NaN	26.2983	NaN	23.5554	25.2223	NaN	NaN	NaN	NaN	amine biosynthetic process;amine metabolic process;aromatic amino acid family biosynthetic process;aromatic amino acid family metabolic process;aromatic compound biosynthetic process;biosynthetic process;carboxylic acid biosynthetic process;carboxylic acid metabolic process;cellular amine metabolic process;cellular amino acid biosynthetic process;cellular amino acid metabolic process;cellular aro…		cell part;chloroplast part;chloroplast stroma;chloroplast thylakoid membrane;cytoplasmic part;intracellular organelle part;intracellular part;membrane;organelle part;photosynthetic membrane;plastid part;plastid stroma;plastid thylakoid membrane;thylakoid membrane;thylakoid part	3	17.4	17.4	28.716	167670000	10
tr|A0A1D6JMR5|A0A1D6JMR5_MAIZE Catalase OS=Zea mays OX=4577 GN=542230 PE=3 SV=1;sp|P12365|CATA2_MAIZE Catalase isozyme 2 OS=Zea mays OX=4577 GN=CAT2 PE=2 SV=3	323.31	71	28	30	29.2547	29.8014	30.1342	30.2242	29.8443	28.8699	30.7679	31.7764	27.7199	28.3846	29.9379	28.3937	27.8968	30.6212	30.3868	30.87	catabolic process;cellular catabolic process;cellular metabolic process;cellular process;cellular response to chemical stimulus;cellular response to hydrogen peroxide;cellular response to oxidative stress;cellular response to reactive oxygen species;cellular response to stimulus;cellular response to stress;hydrogen peroxide catabolic process;hydrogen peroxide metabolic process;metabolic process;r…	antioxidant activity;binding;catalase activity;catalytic activity;cation binding;heme binding;ion binding;iron ion binding;metal ion binding;oxidoreductase activity;oxidoreductase activity, acting on peroxide as acceptor;peroxidase activity;tetrapyrrole binding;transition metal ion binding	cell part;cytoplasmic part;intracellular membrane-bounded organelle;intracellular organelle;intracellular part;membrane-bounded organelle;microbody;organelle;peroxisome	30	71	69.4	56.512	15661000000	378
tr|B4FZF7|B4FZF7_MAIZE UDP-N-acetylglucosamine diphosphorylase 2 OS=Zea mays OX=4577 GN=100279878 PE=2 SV=1;tr|A0A1D6DZS3|A0A1D6DZS3_MAIZE UDP-N-acetylglucosamine diphosphorylase 2 OS=Zea mays OX=4577 GN=100279878 PE=4 SV=1;tr|A0A1D6DZS2|A0A1D6DZS2_MAIZE U	40.281	27.8	3	13	NaN	NaN	24.5548	NaN	NaN	24.3713	NaN	NaN	24.5432	NaN	NaN	NaN	NaN	NaN	NaN	NaN		catalytic activity;nucleotidyltransferase activity;transferase activity;transferase activity, transferring phosphorus-containing groups;uridylyltransferase activity		13	27.8	12.2	54.232	416580000	17
tr|B4G0V9|B4G0V9_MAIZE Seed gene 3 OS=Zea mays OX=4577 GN=100274420 PE=2 SV=1	9.9168	25.5	3	3	NaN	NaN	NaN	NaN	23.1168	24.6024	NaN	NaN	NaN	NaN	NaN	NaN	NaN	NaN	NaN	NaN				3	25.5	25.5	20.531	269870000	17
tr|B4G124|B4G124_MAIZE 26S protease regulatory subunit 8 OS=Zea mays OX=4577 GN=100274445 PE=2 SV=1	230.36	74.6	2	26	24.8708	24.077	NaN	NaN	NaN	NaN	NaN	NaN	25.5429	23.6144	NaN	24.7838	24.1304	24.7174	24.3657	NaN	catabolic process;macromolecule catabolic process;macromolecule metabolic process;metabolic process;primary metabolic process;protein catabolic process;protein metabolic process	adenyl nucleotide binding;adenyl ribonucleotide binding;ATP binding;binding;catalytic activity;hydrolase activity;nucleotide binding;peptidase activity;purine nucleotide binding;purine ribonucleoside triphosphate binding;purine ribonucleotide binding;ribonucleotide binding	cell part;cytoplasm;intracellular part	25	71.8	6.2	47.172	1054000000	62
tr|B4G195|B4G195_MAIZE Glutamate-oxaloacetate transaminase5 OS=Zea mays OX=4577 GN=100274472 PE=2 SV=1;tr|A0A1D6FPP1|A0A1D6FPP1_MAIZE Glutamate-oxaloacetate transaminase5 OS=Zea mays OX=4577 GN=100274472 PE=4 SV=1	21.23	36	8	8	NaN	NaN	25.5056	NaN	NaN	NaN	NaN	NaN	NaN	NaN	NaN	25.7985	NaN	NaN	NaN	NaN	biosynthetic process;metabolic process	binding;catalytic activity;cofactor binding;pyridoxal phosphate binding;transaminase activity;transferase activity;transferase activity, transferring nitrogenous groups;vitamin B6 binding;vitamin binding		8	36	36	49.307	331940000	15
tr|B4G1C1|B4G1C1_MAIZE Putative desiccation-related protein LEA14 OS=Zea mays OX=4577 GN=100274480 PE=2 SV=1	8.8202	22.9	4	4	NaN	NaN	NaN	NaN	NaN	NaN	NaN	NaN	21.9382	21.3549	NaN	21.7611	NaN	21.2066	NaN	NaN	response to abiotic stimulus;response to chemical stimulus;response to desiccation;response to stimulus;response to stress;response to water;response to water deprivation			4	22.9	22.9	17.984	56325000	16
tr|B4G1H1|B4G1H1_MAIZE Dehydrin COR410 OS=Zea mays OX=4577 GN=ZEAMMB73_Zm00001d017547 PE=2 SV=1	62.692	23.1	3	5	21.5285	NaN	NaN	NaN	NaN	NaN	NaN	NaN	NaN	NaN	NaN	NaN	NaN	NaN	NaN	NaN	response to abiotic stimulus;response to chemical stimulus;response to stimulus;response to stress;response to water			3	16.6	16.6	31.44	223530000	18
tr|B6T4R7|B6T4R7_MAIZE Serine/threonine-protein phosphatase OS=Zea mays OX=4577 GN=100282302 PE=2 SV=1;tr|B4G1M9|B4G1M9_MAIZE Serine/threonine-protein phosphatase OS=Zea mays OX=4577 GN=100381284 PE=2 SV=1;tr|A0A1D6GF89|A0A1D6GF89_MAIZE Serine/threonine-pr	7.2453	15.3	3	3	NaN	NaN	24.6388	NaN	NaN	23.9732	NaN	NaN	NaN	NaN	NaN	NaN	NaN	NaN	NaN	NaN		catalytic activity;hydrolase activity;hydrolase activity, acting on ester bonds;phosphatase activity;phosphoprotein phosphatase activity;phosphoric ester hydrolase activity		3	15.3	15.3	35.189	223990000	20
tr|B4G1P9|B4G1P9_MAIZE 3-N-debenzoyl-2-deoxytaxol N-benzoyltransferase OS=Zea mays OX=4577 GN=100284721 PE=2 SV=1	35.032	37.9	6	12	NaN	24.3388	24.3387	NaN	NaN	NaN	NaN	NaN	NaN	NaN	NaN	NaN	NaN	NaN	NaN	NaN		catalytic activity;transferase activity;transferase activity, transferring acyl groups;transferase activity, transferring acyl groups other than amino-acyl groups		6	21.3	21.3	45.948	435140000	39
tr|B4G1T3|B4G1T3_MAIZE Chitinase chem5 OS=Zea mays OX=4577 GN=542525 PE=2 SV=1	41.007	8.8	2	2	26.3239	26.2686	NaN	NaN	NaN	NaN	NaN	23.6463	NaN	NaN	NaN	24.4134	NaN	NaN	NaN	NaN	biosynthetic process;carbohydrate metabolic process;cellular biosynthetic process;cellular macromolecule metabolic process;cellular metabolic process;cellular process;cellular protein metabolic process;developmental process;developmental process involved in reproduction;hydrogen peroxide biosynthetic process;hydrogen peroxide metabolic process;macromolecule metabolic process;macromolecule modific…	catalytic activity;hydrolase activity;hydrolase activity, acting on glycosyl bonds;hydrolase activity, hydrolyzing O-glycosyl compounds		2	8.8	8.8	30.293	852710000	35
tr|B4G256|B4G256_MAIZE Dirigent protein OS=Zea mays OX=4577 GN=ZEAMMB73_Zm00001d005472 PE=2 SV=1	12.409	21	3	3	NaN	NaN	NaN	25.9071	NaN	NaN	NaN	NaN	NaN	NaN	NaN	NaN	24.6862	25.2572	NaN	NaN				3	21	21	32.912	451800000	22
tr|B6SGB6|B6SGB6_MAIZE Pyrophosphate--fructose 6-phosphate 1-phosphotransferase subunit alpha OS=Zea mays OX=4577 GN=100280449 PE=2 SV=1;tr|A0A1D6Q8I9|A0A1D6Q8I9_MAIZE Pyrophosphate--fructose 6-phosphate 1-phosphotransferase subunit alpha OS=Zea mays OX=45	49.786	26	12	12	NaN	NaN	24.1349	NaN	NaN	NaN	NaN	NaN	NaN	NaN	NaN	NaN	NaN	NaN	NaN	NaN	alcohol catabolic process;alcohol metabolic process;carbohydrate catabolic process;carbohydrate metabolic process;catabolic process;cellular carbohydrate catabolic process;cellular carbohydrate metabolic process;cellular metabolic process;cellular process;generation of precursor metabolites and energy;glucose catabolic process;glucose metabolic process;glycolysis;hexose catabolic process;hexose m…	6-phosphofructokinase activity;adenyl nucleotide binding;adenyl ribonucleotide binding;ATP binding;binding;carbohydrate kinase activity;catalytic activity;cation binding;diphosphate-fructose-6-phosphate 1-phosphotransferase activity;ion binding;kinase activity;metal ion binding;nucleotide binding;phosphofructokinase activity;phosphotransferase activity, alcohol group as acceptor;purine nucleotide…	cell part;cytoplasm;intracellular part	12	26	26	67.107	578460000	41
tr|B6SIS5|B6SIS5_MAIZE Ribosomal protein OS=Zea mays OX=4577 GN=100272335 PE=2 SV=1;tr|A0A1D6N6M6|A0A1D6N6M6_MAIZE Ribosomal protein OS=Zea mays OX=4577 GN=100502186 PE=3 SV=1;tr|A0A1D6KMQ3|A0A1D6KMQ3_MAIZE Ribosomal protein OS=Zea mays OX=4577 GN=10027233	3.9916	25	5	5	NaN	NaN	NaN	NaN	NaN	NaN	NaN	NaN	NaN	NaN	NaN	NaN	NaN	NaN	NaN	24.52	biosynthetic process;cellular biosynthetic process;cellular macromolecule biosynthetic process;cellular macromolecule metabolic process;cellular metabolic process;cellular process;cellular protein metabolic process;macromolecule biosynthetic process;macromolecule metabolic process;metabolic process;primary metabolic process;protein metabolic process;translation	binding;nucleic acid binding;RNA binding;structural constituent of ribosome;structural molecule activity	cell part;cytoplasmic part;intracellular non-membrane-bounded organelle;intracellular organelle;intracellular organelle part;intracellular part;large ribosomal subunit;macromolecular complex;non-membrane-bounded organelle;organelle;organelle part;ribonucleoprotein complex;ribosome	5	25	25	24.55	149270000	7
tr|A0A1D6GEW7|A0A1D6GEW7_MAIZE Mg-protoporphyrin IX chelatase OS=Zea mays OX=4577 GN=103625782 PE=3 SV=1;tr|A0A1D6GEW5|A0A1D6GEW5_MAIZE Mg-protoporphyrin IX chelatase OS=Zea mays OX=4577 GN=103625782 PE=3 SV=1;tr|A0A1D6GEX1|A0A1D6GEX1_MAIZE Mg-protoporphyr	167.07	34.3	24	24	26.914	24.9921	26.429	26.3777	28.0495	25.2354	29.1198	26.1991	24.3231	26.7029	26.3589	27.2998	27.6859	26.8905	27.5565	27.8883				24	34.3	34.3	82.209	1826800000	132
tr|B6SJZ5|B6SJZ5_MAIZE Histone H2B OS=Zea mays OX=4577 GN=100502158 PE=2 SV=1	59.844	76.7	1	19	NaN	NaN	NaN	NaN	NaN	NaN	NaN	NaN	NaN	NaN	21.0673	NaN	NaN	NaN	NaN	NaN		binding;DNA binding;nucleic acid binding	cell part;chromosomal part;intracellular membrane-bounded organelle;intracellular organelle;intracellular organelle part;intracellular part;macromolecular complex;membrane-bounded organelle;nucleosome;nucleus;organelle;organelle part;protein-DNA complex	4	31.3	10.7	16.166	31141000	5
tr|B6SLG3|B6SLG3_MAIZE Acid phosphatase OS=Zea mays OX=4577 GN=100280755 PE=2 SV=1;tr|C0P766|C0P766_MAIZE Survival protein SurE-like phosphatase/nucleotidase OS=Zea mays OX=4577 GN=100280755 PE=2 SV=1;tr|A0A1D6NEB2|A0A1D6NEB2_MAIZE Survival protein SurE-li	23.805	31.7	6	6	NaN	23.3977	23.9562	NaN	23.3597	23.0917	23.5064	23.3336	NaN	23.3013	NaN	NaN	NaN	NaN	NaN	NaN		catalytic activity;hydrolase activity		6	31.7	31.7	41.407	382230000	31
tr|B4FVD5|B4FVD5_MAIZE V-type proton ATPase subunit E3 OS=Zea mays OX=4577 GN=100273417 PE=2 SV=1;tr|A0A1D6G0U9|A0A1D6G0U9_MAIZE V-type proton ATPase subunit E3 OS=Zea mays OX=4577 GN=100273417 PE=4 SV=1	265.61	51.3	3	14	23.8035	24.0388	23.6701	NaN	NaN	NaN	NaN	NaN	NaN	NaN	NaN	23.5007	NaN	NaN	24.8339	NaN	ATP hydrolysis coupled proton transport;cation transport;cellular process;energy coupled proton transport, against electrochemical gradient;establishment of localization;hydrogen transport;ion transmembrane transport;ion transport;monovalent inorganic cation transport;proton transport;transmembrane transport;transport	active transmembrane transporter activity;ATPase activity;ATPase activity, coupled;ATPase activity, coupled to movement of substances;ATPase activity, coupled to transmembrane movement of ions;ATPase activity, coupled to transmembrane movement of substances;catalytic activity;cation transmembrane transporter activity;cation-transporting ATPase activity;hydrogen ion transmembrane transporter activ…	cell part;macromolecular complex;membrane part;protein complex;proton-transporting two-sector ATPase complex, catalytic domain	14	51.3	17	26.629	365960000	26
tr|B6SNL8|B6SNL8_MAIZE 60S ribosomal protein L38 OS=Zea mays OX=4577 GN=ZEAMMB73_Zm00001d052718 PE=2 SV=1;tr|A0A1D6QJ28|A0A1D6QJ28_MAIZE 60S ribosomal protein L38 OS=Zea mays OX=4577 GN=ZEAMMB73_Zm00001d052718 PE=3 SV=1;tr|A0A1D6KKT1|A0A1D6KKT1_MAIZE 60S r	6.0816	34.8	2	2	NaN	NaN	NaN	NaN	NaN	NaN	NaN	NaN	23.7844	NaN	NaN	NaN	NaN	NaN	NaN	NaN	biosynthetic process;cellular biosynthetic process;cellular macromolecule biosynthetic process;cellular macromolecule metabolic process;cellular metabolic process;cellular process;cellular protein metabolic process;macromolecule biosynthetic process;macromolecule metabolic process;metabolic process;primary metabolic process;protein metabolic process;translation	structural constituent of ribosome;structural molecule activity	cell part;cytoplasmic part;intracellular non-membrane-bounded organelle;intracellular organelle;intracellular part;macromolecular complex;non-membrane-bounded organelle;organelle;ribonucleoprotein complex;ribosome	2	34.8	34.8	8.0625	11948000	2
tr|B6SNM4|B6SNM4_MAIZE Protein transport protein Sec61 subunit beta OS=Zea mays OX=4577 GN=100280873 PE=2 SV=1	34.517	23.4	2	2	NaN	NaN	NaN	NaN	NaN	NaN	NaN	NaN	NaN	21.8238	NaN	NaN	NaN	NaN	NaN	NaN	establishment of localization;establishment of localization in cell;establishment of protein localization;intracellular protein transport;intracellular transport;protein transport;transport		cell part;cytoplasmic part;endoplasmic reticulum part;intracellular organelle part;intracellular part;macromolecular complex;membrane part;organelle part;protein complex;Sec61 translocon complex;translocon complex	2	23.4	23.4	10.614	41056000	10
tr|B6SQN8|B6SQN8_MAIZE Phosphoprotein phosphatase inhibitors OS=Zea mays OX=4577 GN=100280985 PE=2 SV=1	21.448	34.5	4	4	NaN	NaN	NaN	NaN	NaN	NaN	NaN	22.7222	NaN	NaN	NaN	NaN	NaN	NaN	NaN	NaN	biological regulation;regulation of biological process;regulation of catalytic activity;regulation of cellular metabolic process;regulation of cellular process;regulation of dephosphorylation;regulation of hydrolase activity;regulation of metabolic process;regulation of molecular function;regulation of phosphatase activity;regulation of phosphate metabolic process;regulation of phosphoprotein pho…	enzyme inhibitor activity;enzyme regulator activity;phosphatase inhibitor activity;phosphatase regulator activity;protein phosphatase inhibitor activity;protein phosphatase regulator activity		4	34.5	34.5	18.317	187000000	22
tr|B6SRI4|B6SRI4_MAIZE 14-3-3-like protein OS=Zea mays OX=4577 GN=103643291 PE=2 SV=1	29.437	69.9	5	20	23.9443	24.2091	NaN	NaN	NaN	NaN	NaN	NaN	24.9282	NaN	NaN	NaN	NaN	NaN	NaN	NaN				5	26.6	26.6	28.947	576810000	22
tr|B6SSB6|B6SSB6_MAIZE Eukaryotic translation initiation factor 3 subunit I OS=Zea mays OX=4577 GN=100281110 PE=2 SV=1;tr|A0A1D6HT03|A0A1D6HT03_MAIZE Eukaryotic translation initiation factor 3 subunit I OS=Zea mays OX=4577 GN=100281110 PE=3 SV=1;tr|A0A1D6H	212.72	70.9	3	22	NaN	24.7302	NaN	NaN	NaN	NaN	NaN	NaN	NaN	NaN	NaN	NaN	NaN	NaN	24.4508	24.9269	biological regulation;cellular component assembly;cellular component assembly at cellular level;cellular component organization;cellular component organization at cellular level;cellular component organization or biogenesis;cellular component organization or biogenesis at cellular level;cellular macromolecular complex assembly;cellular macromolecular complex subunit organization;cellular process;…	binding;nucleic acid binding;RNA binding;translation factor activity, nucleic acid binding;translation initiation factor activity	cell part;cytoplasmic part;eukaryotic 43S preinitiation complex;eukaryotic 48S preinitiation complex;eukaryotic translation initiation factor 3 complex;intracellular part;macromolecular complex;protein complex;ribonucleoprotein complex;translation preinitiation complex	22	70.9	9.8	36.259	563850000	32
tr|B6SSX2|B6SSX2_MAIZE Gamma-glutamyltranspeptidase 1 OS=Zea mays OX=4577 GN=100281180 PE=2 SV=1;tr|A0A1D6E9A0|A0A1D6E9A0_MAIZE Gamma-glutamyltranspeptidase 1 OS=Zea mays OX=4577 GN=100281180 PE=4 SV=1;tr|A0A1D6E9A2|A0A1D6E9A2_MAIZE Gamma-glutamyltranspept	3.8396	5.9	2	2	22.3851	NaN	NaN	NaN	NaN	NaN	NaN	NaN	NaN	NaN	NaN	NaN	NaN	NaN	NaN	NaN	amine metabolic process;carboxylic acid metabolic process;cellular amine metabolic process;cellular amino acid metabolic process;cellular ketone metabolic process;cellular metabolic process;cellular modified amino acid metabolic process;cellular nitrogen compound metabolic process;cellular process;glutathione metabolic process;metabolic process;nitrogen compound metabolic process;organic acid met…	catalytic activity;gamma-glutamyltransferase activity;transferase activity;transferase activity, transferring acyl groups;transferase activity, transferring amino-acyl groups		2	5.9	5.9	61.255	36830000	4
tr|B6ST13|B6ST13_MAIZE AMP binding protein OS=Zea mays OX=4577 GN=100281193 PE=2 SV=1	6.441	8.7	3	3	NaN	NaN	21.5681	NaN	NaN	NaN	NaN	NaN	NaN	NaN	NaN	21.6505	NaN	NaN	21.3927	21.3512		catalytic activity		3	8.7	8.7	62.142	36868000	15
tr|B6STV3|B6STV3_MAIZE Uncharacterized protein OS=Zea mays OX=4577 GN=100275476 PE=2 SV=1	1.5906	8.3	1	2	NaN	NaN	NaN	NaN	NaN	NaN	NaN	NaN	NaN	NaN	NaN	NaN	NaN	NaN	21.6345	NaN				2	8.3	2.9	28.619	12142000	1
tr|B6SUW2|B6SUW2_MAIZE Alpha/beta-Hydrolases superfamily protein OS=Zea mays OX=4577 GN=100281378 PE=2 SV=1	4.9521	15.2	4	4	NaN	24.6859	NaN	NaN	NaN	NaN	NaN	NaN	NaN	NaN	NaN	22.891	NaN	NaN	NaN	NaN		catalytic activity;hydrolase activity		4	15.2	15.2	36.297	45808000	6
tr|B6SXV2|B6SXV2_MAIZE RNA-binding protein AKIP1 OS=Zea mays OX=4577 GN=100281694 PE=2 SV=1	5.929	19.6	5	11	22.2954	NaN	NaN	NaN	NaN	NaN	23.0747	22.8829	NaN	NaN	NaN	NaN	NaN	NaN	NaN	NaN		binding;nucleic acid binding;nucleotide binding		5	11.5	11.5	53.286	257870000	16
tr|B6SZS2|B6SZS2_MAIZE 40S ribosomal protein S9 OS=Zea mays OX=4577 GN=100192774 PE=2 SV=1;tr|A0A1D6F247|A0A1D6F247_MAIZE 40S ribosomal protein S9-2 OS=Zea mays OX=4577 GN=100283332 PE=4 SV=1;tr|A0A1D6IKG2|A0A1D6IKG2_MAIZE 40S ribosomal protein S9-2 OS=Zea	10.061	53.9	2	14	NaN	NaN	NaN	NaN	NaN	NaN	NaN	NaN	24.3193	NaN	23.2181	NaN	23.5244	NaN	NaN	NaN	biosynthetic process;cellular biosynthetic process;cellular macromolecule biosynthetic process;cellular macromolecule metabolic process;cellular metabolic process;cellular process;cellular protein metabolic process;macromolecule biosynthetic process;macromolecule metabolic process;metabolic process;primary metabolic process;protein metabolic process;translation	binding;nucleic acid binding;RNA binding;rRNA binding;structural constituent of ribosome;structural molecule activity	cell part;intracellular organelle part;intracellular part;macromolecular complex;organelle part;ribonucleoprotein complex;small ribosomal subunit	5	31.6	18.1	22.547	137270000	6
tr|B6T1D2|B6T1D2_MAIZE Eukaryotic translation initiation factor 4E-2 OS=Zea mays OX=4577 GN=ZEAMMB73_Zm00001d032775 PE=2 SV=1;tr|A0A1D6KTX3|A0A1D6KTX3_MAIZE Eukaryotic translation initiation factor isoform 4E OS=Zea mays OX=4577 GN=ZEAMMB73_Zm00001d032775	56.132	26.2	2	3	NaN	NaN	NaN	NaN	NaN	23.4588	NaN	NaN	NaN	NaN	22.628	23.3158	NaN	NaN	NaN	NaN		binding;nucleic acid binding;RNA binding;translation factor activity, nucleic acid binding;translation initiation factor activity	cell part;cytoplasm;intracellular part	3	26.2	19.5	23.523	144950000	12
tr|B4FTL0|B4FTL0_MAIZE BAG family molecular chaperone regulator 7 OS=Zea mays OX=4577 GN=100273212 PE=2 SV=1	32.115	35	10	10	24.374	NaN	23.3844	23.9935	23.9173	NaN	23.7792	24.0889	NaN	23.1396	23.2324	NaN	24.6239	24.403	NaN	NaN				10	35	35	46.539	1149400000	65
tr|B6T2C6|B6T2C6_MAIZE Peptide-methionine (R)-S-oxide reductase OS=Zea mays OX=4577 GN=100281999 PE=2 SV=1	18.33	59.3	5	5	NaN	NaN	23.8504	23.9294	NaN	NaN	NaN	NaN	23.7139	NaN	NaN	NaN	NaN	NaN	NaN	NaN	cellular macromolecule metabolic process;cellular metabolic process;cellular process;cellular protein metabolic process;macromolecule metabolic process;metabolic process;primary metabolic process;protein metabolic process;protein repair;response to chemical stimulus;response to oxidative stress;response to stimulus;response to stress	catalytic activity;oxidoreductase activity;oxidoreductase activity, acting on a sulfur group of donors;oxidoreductase activity, acting on a sulfur group of donors, disulfide as acceptor;peptide-methionine (R)-S-oxide reductase activity		5	59.3	59.3	14.652	281420000	16
tr|B6T2T0|B6T2T0_MAIZE DNA binding activity2 OS=Zea mays OX=4577 GN=103651402 PE=2 SV=1;tr|A0A1D6NGU8|A0A1D6NGU8_MAIZE DNA binding activity2 OS=Zea mays OX=4577 GN=103651402 PE=4 SV=1	8.9799	51.3	3	14	23.2018	23.4345	NaN	NaN	NaN	NaN	NaN	NaN	NaN	NaN	NaN	24.2241	NaN	NaN	NaN	NaN	ATP hydrolysis coupled proton transport;cation transport;cellular process;energy coupled proton transport, against electrochemical gradient;establishment of localization;hydrogen transport;ion transmembrane transport;ion transport;monovalent inorganic cation transport;proton transport;transmembrane transport;transport	active transmembrane transporter activity;ATPase activity;ATPase activity, coupled;ATPase activity, coupled to movement of substances;ATPase activity, coupled to transmembrane movement of ions;ATPase activity, coupled to transmembrane movement of substances;catalytic activity;cation transmembrane transporter activity;cation-transporting ATPase activity;hydrogen ion transmembrane transporter activ…	cell part;macromolecular complex;membrane part;protein complex;proton-transporting two-sector ATPase complex, catalytic domain	3	17	17	26.613	213790000	33
tr|B6T2X7|B6T2X7_MAIZE Histone H1 OS=Zea mays OX=4577 GN=103625810 PE=2 SV=1;tr|A0A1D6GFH2|A0A1D6GFH2_MAIZE Histone H1 OS=Zea mays OX=4577 GN=103625810 PE=3 SV=1;tr|A0A1D6GFH5|A0A1D6GFH5_MAIZE Histone H1 OS=Zea mays OX=4577 GN=103625810 PE=3 SV=1;tr|A0A1D6	14.323	36.8	6	9	NaN	NaN	NaN	NaN	24.678	24.7013	NaN	25.1149	24.154	NaN	NaN	NaN	NaN	NaN	NaN	NaN	cellular component assembly;cellular component assembly at cellular level;cellular component organization;cellular component organization at cellular level;cellular component organization or biogenesis;cellular component organization or biogenesis at cellular level;cellular macromolecular complex assembly;cellular macromolecular complex subunit organization;cellular process;chromatin organization…	binding;DNA binding;nucleic acid binding	cell part;chromosomal part;intracellular membrane-bounded organelle;intracellular organelle;intracellular organelle part;intracellular part;macromolecular complex;membrane-bounded organelle;nucleosome;nucleus;organelle;organelle part;protein-DNA complex	6	33.3	33.3	26.529	621650000	36
tr|B6T2Y5|B6T2Y5_MAIZE S-formylglutathione hydrolase OS=Zea mays OX=4577 GN=100282053 PE=2 SV=1;tr|K7V5R6|K7V5R6_MAIZE S-formylglutathione hydrolase OS=Zea mays OX=4577 GN=100282053 PE=3 SV=1;tr|A0A1D6G4Q4|A0A1D6G4Q4_MAIZE S-formylglutathione hydrolase OS=	5.4912	21.4	4	4	23.6092	24.1594	24.4155	23.6346	NaN	25.2151	NaN	NaN	NaN	NaN	NaN	25.7573	NaN	NaN	NaN	NaN	aldehyde catabolic process;catabolic process;cellular aldehyde metabolic process;cellular catabolic process;cellular metabolic process;cellular process;formaldehyde catabolic process;formaldehyde metabolic process;metabolic process;small molecule catabolic process;small molecule metabolic process	catalytic activity;hydrolase activity;hydrolase activity, acting on ester bonds;S-formylglutathione hydrolase activity;thiolester hydrolase activity		4	21.4	21.4	31.886	280470000	16
tr|B6T401|B6T401_MAIZE Peptidyl-prolyl cis-trans isomerase OS=Zea mays OX=4577 GN=100286056 PE=2 SV=1	4.0918	16.6	3	3	NaN	NaN	NaN	NaN	NaN	NaN	NaN	NaN	22.4228	NaN	NaN	NaN	NaN	NaN	NaN	NaN		catalytic activity;cis-trans isomerase activity;isomerase activity;peptidyl-prolyl cis-trans isomerase activity		3	16.6	16.6	15.766	57679000	7
tr|B6T4L6|B6T4L6_MAIZE Ubiquitin fusion degradation protein 1 OS=Zea mays OX=4577 GN=100282176 PE=2 SV=1	12.544	21.2	3	4	NaN	NaN	NaN	NaN	NaN	NaN	NaN	NaN	NaN	NaN	23.8107	NaN	23.8093	NaN	NaN	23.271	catabolic process;cellular catabolic process;cellular macromolecule catabolic process;cellular macromolecule metabolic process;cellular metabolic process;cellular process;macromolecule catabolic process;macromolecule metabolic process;metabolic process;modification-dependent macromolecule catabolic process;modification-dependent protein catabolic process;primary metabolic process;protein metaboli…			3	16.5	16.5	35.581	298880000	17
tr|A0A1D6IAN8|A0A1D6IAN8_MAIZE Octicosapeptide/Phox/Bem1p (PB1) domain-containing protein / tetratricopeptide repeat (TPR)-containing protein OS=Zea mays OX=4577 GN=ZEAMMB73_Zm00001d021400 PE=4 SV=1;tr|A0A1D6IAN9|A0A1D6IAN9_MAIZE Octicosapeptide/Phox/Bem1p	83.723	32.6	15	15	23.8315	22.894	25.1741	24.3855	25.9369	NaN	25.7565	25.9088	NaN	NaN	24.2404	22.0014	23.8728	25.4573	23.9675	25.208				15	32.6	32.6	77.945	1583000000	97
tr|B6T6S5|B6T6S5_MAIZE Glucose-6-phosphate 1-epimerase OS=Zea mays OX=4577 GN=100282376 PE=2 SV=1;tr|A0A1D6IZ31|A0A1D6IZ31_MAIZE Galactose mutarotase-like superfamily protein OS=Zea mays OX=4577 GN=100282376 PE=4 SV=1	27.45	45.2	6	13	NaN	NaN	NaN	24.231	NaN	23.7512	NaN	NaN	NaN	NaN	NaN	NaN	NaN	NaN	NaN	NaN	carbohydrate metabolic process;metabolic process;primary metabolic process	binding;carbohydrate binding;catalytic activity;isomerase activity		11	42.2	26.2	36.626	407360000	23
tr|B6T892|B6T892_MAIZE Chlorophyll a-b binding protein, chloroplastic OS=Zea mays OX=4577 GN=100282512 PE=1 SV=1;tr|B6TKL9|B6TKL9_MAIZE Chlorophyll a-b binding protein, chloroplastic OS=Zea mays OX=4577 GN=100191715 PE=2 SV=1	6.3405	23.7	3	3	25.9375	NaN	NaN	NaN	NaN	NaN	NaN	24.2612	25.0394	NaN	NaN	NaN	NaN	NaN	NaN	NaN	cellular macromolecule metabolic process;cellular metabolic process;cellular process;cellular protein metabolic process;generation of precursor metabolites and energy;macromolecule metabolic process;macromolecule modification;metabolic process;photosynthesis, light harvesting;primary metabolic process;protein metabolic process;protein modification process;protein-chromophore linkage	binding;cation binding;chlorophyll binding;ion binding;metal ion binding;tetrapyrrole binding	cell part;chloroplast;cytoplasmic part;integral to membrane;intracellular membrane-bounded organelle;intracellular organelle;intracellular part;intrinsic to membrane;macromolecular complex;membrane part;membrane-bounded organelle;organelle;photosystem;photosystem I;photosystem II;plastid;protein complex;thylakoid part	3	23.7	23.7	29.214	235320000	8
tr|B6T8F4|B6T8F4_MAIZE Ran-binding protein 1 OS=Zea mays OX=4577 GN=100282524 PE=2 SV=1;tr|A0A1D6M2N3|A0A1D6M2N3_MAIZE Ran-binding protein 1 homolog a OS=Zea mays OX=4577 GN=100282524 PE=4 SV=1;tr|A0A1D6M2N5|A0A1D6M2N5_MAIZE Ran-binding protein 1 homolog a	79.49	75	9	14	NaN	NaN	23.2734	NaN	22.8928	NaN	23.7013	NaN	NaN	NaN	NaN	24.5354	NaN	NaN	NaN	NaN	establishment of localization;establishment of localization in cell;intracellular transport;transport			9	61.8	61.8	23.958	585770000	47
sp|P24824|CHS1_MAIZE Chalcone synthase WHP1 OS=Zea mays OX=4577 GN=WHP1 PE=3 SV=1;tr|B6T9S4|B6T9S4_MAIZE Chalcone synthase OS=Zea mays OX=4577 GN=100282642 PE=2 SV=1	3.1971	10.5	2	3	NaN	NaN	23.2459	NaN	NaN	NaN	NaN	NaN	NaN	NaN	NaN	NaN	NaN	NaN	NaN	NaN	anthocyanin biosynthetic process;anthocyanin metabolic process;aromatic compound biosynthetic process;auxin polar transport;auxin transport;biological regulation;biosynthetic process;cellular aromatic compound metabolic process;cellular biosynthetic process;cellular metabolic process;cellular process;establishment of localization;flavonoid biosynthetic process;flavonoid metabolic process;hormone …	catalytic activity;naringenin-chalcone synthase activity;transferase activity;transferase activity, transferring acyl groups;transferase activity, transferring acyl groups other than amino-acyl groups	cell part;cytoplasmic part;endoplasmic reticulum;intracellular membrane-bounded organelle;intracellular organelle;intracellular organelle part;intracellular part;membrane;membrane-bounded organelle;nucleus;organelle;organelle membrane;organelle part;plant-type vacuole membrane;vacuolar membrane;vacuolar part	2	3	3	43.172	14675000	2
tr|B6T9T4|B6T9T4_MAIZE ATP-dependent Clp protease proteolytic subunit OS=Zea mays OX=4577 GN=100282645 PE=2 SV=1;tr|A0A1D6K2T0|A0A1D6K2T0_MAIZE ATP-dependent Clp protease proteolytic subunit OS=Zea mays OX=4577 GN=100282645 PE=3 SV=1	4.7	11.8	3	3	22.3077	22.8517	NaN	NaN	NaN	NaN	NaN	NaN	22.8731	NaN	NaN	NaN	NaN	NaN	NaN	NaN		catalytic activity;endopeptidase activity;hydrolase activity;peptidase activity;peptidase activity, acting on L-amino acid peptides;serine hydrolase activity;serine-type endopeptidase activity;serine-type peptidase activity		3	11.8	11.8	36.992	26926000	3
tr|B6TA85|B6TA85_MAIZE Protein binding protein OS=Zea mays OX=4577 GN=100273542 PE=2 SV=1	18.968	17.6	5	5	NaN	23.0664	23.9486	NaN	NaN	24.4422	NaN	NaN	NaN	NaN	NaN	NaN	NaN	NaN	NaN	NaN				5	17.6	17.6	47.57	367590000	49
tr|B6TAQ5|B6TAQ5_MAIZE 40S ribosomal protein S3a OS=Zea mays OX=4577 GN=100282717 PE=2 SV=1;tr|A0A1D6JS67|A0A1D6JS67_MAIZE 40S ribosomal protein S3a-2 OS=Zea mays OX=4577 GN=100282717 PE=4 SV=1	4.1777	85.4	2	33	NaN	NaN	NaN	NaN	NaN	NaN	NaN	NaN	NaN	NaN	23.3645	NaN	NaN	23.7707	NaN	NaN	biosynthetic process;cellular biosynthetic process;cellular macromolecule biosynthetic process;cellular macromolecule metabolic process;cellular metabolic process;cellular process;cellular protein metabolic process;macromolecule biosynthetic process;macromolecule metabolic process;metabolic process;primary metabolic process;protein metabolic process;translation	structural constituent of ribosome;structural molecule activity	cell part;cytosolic small ribosomal subunit;intracellular organelle part;intracellular part;macromolecular complex;organelle part;ribonucleoprotein complex;small ribosomal subunit	2	10.4	10.4	29.741	350430000	18
tr|B6TAW2|B6TAW2_MAIZE Chaperone protein dnaJ 10 OS=Zea mays OX=4577 GN=100282737 PE=2 SV=1;tr|A0A1D6KJ45|A0A1D6KJ45_MAIZE Chaperone protein dnaJ 10 OS=Zea mays OX=4577 GN=100282737 PE=4 SV=1	19.096	26.2	5	5	NaN	NaN	NaN	NaN	NaN	NaN	NaN	NaN	NaN	NaN	NaN	NaN	NaN	NaN	NaN	22.837				5	26.2	26.2	43.632	281750000	34
sp|B6TB21|DRE2_MAIZE Anamorsin homolog OS=Zea mays OX=4577 PE=2 SV=1	2.1203	56.3	2	8	NaN	NaN	NaN	NaN	NaN	NaN	NaN	NaN	23.3633	NaN	NaN	NaN	NaN	NaN	NaN	NaN	biological regulation;biosynthetic process;cellular biosynthetic process;cellular metabolic process;cellular process;cofactor biosynthetic process;cofactor metabolic process;iron-sulfur cluster assembly;metabolic process;metallo-sulfur cluster assembly;negative regulation of apoptosis;negative regulation of biological process;negative regulation of cell death;negative regulation of cellular proce…	2 iron, 2 sulfur cluster binding;binding;catalytic activity;cation binding;electron carrier activity;ion binding;iron-sulfur cluster binding;metal cluster binding;metal ion binding;methyltransferase activity;transferase activity;transferase activity, transferring one-carbon groups	cell part;cytoplasmic part;intracellular organelle part;intracellular part;membrane-enclosed lumen;mitochondrial intermembrane space;mitochondrial part;organelle envelope lumen;organelle part	2	8	8	27.487	202820000	17
tr|B4FL64|B4FL64_MAIZE Ribosomal protein L19 OS=Zea mays OX=4577 GN=100282430 PE=2 SV=1	197.46	36.7	3	11	NaN	NaN	24.1166	25.0322	26.7817	25.6042	NaN	26.4067	26.1253	24.1926	NaN	25.0192	NaN	NaN	NaN	NaN	biosynthetic process;cellular biosynthetic process;cellular macromolecule biosynthetic process;cellular macromolecule metabolic process;cellular metabolic process;cellular process;cellular protein metabolic process;macromolecule biosynthetic process;macromolecule metabolic process;metabolic process;primary metabolic process;protein metabolic process;translation	structural constituent of ribosome;structural molecule activity	cell part;cytoplasmic part;intracellular non-membrane-bounded organelle;intracellular organelle;intracellular part;macromolecular complex;non-membrane-bounded organelle;organelle;ribonucleoprotein complex;ribosome	11	36.7	11.6	24.114	684870000	41
tr|B6TCC9|B6TCC9_MAIZE Dolichyl-diphosphooligosaccharide--protein glycosyltransferase subunit 1 OS=Zea mays OX=4577 GN=100282884 PE=2 SV=1;tr|C0PEL3|C0PEL3_MAIZE Dolichyl-diphosphooligosaccharide--protein glycosyltransferase subunit 1 OS=Zea mays OX=4577 G	38.174	24.1	7	7	NaN	23.8306	NaN	24.382	24.3653	NaN	NaN	24.8435	NaN	NaN	NaN	NaN	NaN	NaN	NaN	NaN	carbohydrate metabolic process;cellular carbohydrate metabolic process;cellular macromolecule metabolic process;cellular metabolic process;cellular process;cellular protein metabolic process;glycosylation;macromolecule glycosylation;macromolecule metabolic process;macromolecule modification;metabolic process;primary metabolic process;protein glycosylation;protein metabolic process;protein modific…	catalytic activity;dolichyl-diphosphooligosaccharide-protein glycotransferase activity;oligosaccharyl transferase activity;transferase activity;transferase activity, transferring glycosyl groups;transferase activity, transferring hexosyl groups	cell part;cell wall;cytoplasmic part;endoplasmic reticulum membrane;endoplasmic reticulum part;external encapsulating structure;integral to membrane;intracellular organelle part;intracellular part;intrinsic to membrane;membrane;membrane part;organelle membrane;organelle part;plant-type cell wall;plasma membrane;vacuolar membrane;vacuolar part	7	24.1	24.1	54.065	1081100000	69
tr|B6TD62|B6TD62_MAIZE Membrane steroid-binding protein 1 OS=Zea mays OX=4577 GN=100282951 PE=2 SV=1;tr|A0A1D6GNK3|A0A1D6GNK3_MAIZE Membrane steroid-binding protein 1 OS=Zea mays OX=4577 GN=100282951 PE=4 SV=1	40.068	31.9	3	5	NaN	NaN	NaN	NaN	NaN	NaN	NaN	NaN	NaN	NaN	NaN	NaN	NaN	NaN	22.1451	NaN		binding;cation binding;heme binding;ion binding;iron ion binding;metal ion binding;tetrapyrrole binding;transition metal ion binding		5	31.9	21.1	24.567	20031000	8
tr|B6TDW7|B6TDW7_MAIZE Secretory protein OS=Zea mays OX=4577 GN=100283021 PE=2 SV=1	21.297	36	6	6	NaN	22.7133	NaN	23.8431	NaN	23.5866	NaN	NaN	NaN	NaN	NaN	23.8177	NaN	NaN	NaN	NaN				6	36	36	24.482	772540000	37
tr|B6TFV4|B6TFV4_MAIZE Mitochondrial glycoprotein OS=Zea mays OX=4577 GN=100283220 PE=2 SV=1	9.5653	23.2	5	5	NaN	NaN	NaN	NaN	NaN	NaN	22.4562	NaN	NaN	NaN	NaN	NaN	NaN	NaN	NaN	NaN			cell part;cytoplasmic part;intracellular organelle lumen;intracellular organelle part;intracellular part;membrane-enclosed lumen;mitochondrial matrix;mitochondrial part;organelle lumen;organelle part	5	23.2	23.2	29.579	146110000	10
tr|B6TI18|B6TI18_MAIZE Eukaryotic translation initiation factor 2 beta subunit OS=Zea mays OX=4577 GN=100502362 PE=2 SV=1	3.4547	57.3	2	15	NaN	NaN	NaN	NaN	NaN	NaN	24.8771	NaN	NaN	NaN	NaN	NaN	NaN	NaN	NaN	NaN		binding;nucleic acid binding;RNA binding;translation factor activity, nucleic acid binding;translation initiation factor activity		2	21	21	30.372	257120000	6
tr|B6TJH8|B6TJH8_MAIZE Mitochondrial glycoprotein OS=Zea mays OX=4577 GN=100283563 PE=2 SV=1	163.15	27	4	4	23.7647	NaN	23.4775	NaN	NaN	NaN	NaN	NaN	24.0934	NaN	NaN	NaN	NaN	NaN	NaN	NaN			cell part;cytoplasmic part;intracellular organelle lumen;intracellular organelle part;intracellular part;membrane-enclosed lumen;mitochondrial matrix;mitochondrial part;organelle lumen;organelle part	4	27	27	27.168	300630000	30
tr|B6TJX6|B6TJX6_MAIZE PTI1-like tyrosine-protein kinase 3 OS=Zea mays OX=4577 GN=100037783 PE=2 SV=1;tr|K7U163|K7U163_MAIZE PTI1-like tyrosine-protein kinase 3 OS=Zea mays OX=4577 GN=100037783 PE=3 SV=1;tr|A0A1D6J1P7|A0A1D6J1P7_MAIZE PTI1-like tyrosine-pr	24.962	37	8	10	22.8423	23.5111	23.6828	NaN	NaN	NaN	NaN	NaN	23.2687	NaN	NaN	NaN	NaN	NaN	22.8675	NaN		adenyl nucleotide binding;adenyl ribonucleotide binding;ATP binding;binding;catalytic activity;kinase activity;nucleotide binding;phosphotransferase activity, alcohol group as acceptor;protein kinase activity;protein serine/threonine kinase activity;purine nucleotide binding;purine ribonucleoside triphosphate binding;purine ribonucleotide binding;ribonucleotide binding;transferase activity;transf…		10	37	31.5	39.355	385100000	24
tr|Q8W0V2|Q8W0V2_MAIZE Lipoxygenase OS=Zea mays OX=4577 GN=542495 PE=3 SV=1;tr|A0A1D6L0J1|A0A1D6L0J1_MAIZE Lipoxygenase OS=Zea mays OX=4577 GN=542495 PE=3 SV=1;tr|A0A1D6L0J4|A0A1D6L0J4_MAIZE Lipoxygenase OS=Zea mays OX=4577 GN=542495 PE=3 SV=1;tr|A0A1D6L0J	323.31	66.9	45	54	25.9653	25.9822	24.7483	25.7095	22.2271	24.9385	23.9533	25.7066	26.2	26.0527	22.0613	26.7114	26.702	25.9275	27.2761	26.2808	biosynthetic process;carboxylic acid biosynthetic process;carboxylic acid metabolic process;cellular biosynthetic process;cellular ketone metabolic process;cellular lipid metabolic process;cellular metabolic process;cellular process;fatty acid biosynthetic process;fatty acid metabolic process;lipid biosynthetic process;lipid metabolic process;metabolic process;monocarboxylic acid metabolic proces…	binding;catalytic activity;cation binding;dioxygenase activity;ion binding;metal ion binding;oxidoreductase activity;oxidoreductase activity, acting on single donors with incorporation of molecular oxygen;oxidoreductase activity, acting on single donors with incorporation of molecular oxygen, incorporation of two atoms of oxygen		45	58.3	58.3	96.489	10680000000	422
tr|B6TKK2|B6TKK2_MAIZE Gibberellin receptor GID1L2 OS=Zea mays OX=4577 GN=100283680 PE=2 SV=1	14.408	36.7	9	9	NaN	NaN	23.7154	NaN	NaN	23.9352	23.3262	NaN	NaN	NaN	NaN	NaN	NaN	NaN	NaN	NaN		catalytic activity;hydrolase activity		9	36.7	36.7	38.35	417160000	25
tr|B6TKU0|B6TKU0_MAIZE Growth inhibition and differentiation-related protein 88 OS=Zea mays OX=4577 GN=100283709 PE=2 SV=1	6.4213	8.8	2	2	NaN	NaN	NaN	NaN	NaN	NaN	NaN	21.4889	NaN	NaN	NaN	NaN	NaN	NaN	NaN	NaN		binding;nucleotide binding		2	8.8	8.8	39.375	7492500	3
tr|B6TKY3|B6TKY3_MAIZE T-complex protein 1 subunit alpha OS=Zea mays OX=4577 GN=100283716 PE=2 SV=1;tr|A0A1D6QCF7|A0A1D6QCF7_MAIZE T-complex protein 1 subunit alpha OS=Zea mays OX=4577 GN=100283716 PE=3 SV=1;tr|A0A1D6QCF9|A0A1D6QCF9_MAIZE T-complex protein	141.04	59.3	3	25	NaN	NaN	NaN	NaN	NaN	NaN	23.5609	NaN	NaN	NaN	NaN	NaN	NaN	NaN	NaN	NaN	cellular macromolecule metabolic process;cellular metabolic process;cellular process;cellular protein metabolic process;macromolecule metabolic process;metabolic process;primary metabolic process;protein folding;protein metabolic process	adenyl nucleotide binding;adenyl ribonucleotide binding;ATP binding;binding;nucleotide binding;purine nucleotide binding;purine ribonucleoside triphosphate binding;purine ribonucleotide binding;ribonucleotide binding	cell part;cytoplasm;intracellular part	25	59.3	6.4	59.194	445070000	13
tr|B6TLC8|B6TLC8_MAIZE Cysteine protease XCP1 OS=Zea mays OX=4577 GN=100283748 PE=2 SV=1	12.415	16.6	4	4	NaN	23.9022	NaN	NaN	NaN	NaN	NaN	NaN	NaN	NaN	NaN	NaN	NaN	NaN	NaN	NaN		catalytic activity;cysteine-type peptidase activity;hydrolase activity;peptidase activity;peptidase activity, acting on L-amino acid peptides		4	16.6	16.6	41.596	490500000	34
tr|B6TSQ3|B6TSQ3_MAIZE PYM protein OS=Zea mays OX=4577 GN=100283795 PE=2 SV=1;tr|B6TLX6|B6TLX6_MAIZE PYM protein OS=Zea mays OX=4577 GN=100283795 PE=2 SV=1;tr|A0A1D6JX12|A0A1D6JX12_MAIZE PYM protein OS=Zea mays OX=4577 GN=100283795 PE=4 SV=1;tr|A0A1D6PEB0|	13.732	22.2	4	4	NaN	NaN	NaN	22.4648	NaN	NaN	NaN	NaN	NaN	NaN	NaN	NaN	NaN	NaN	NaN	NaN				4	22.2	22.2	24.59	171890000	15
tr|B6TMU3|B6TMU3_MAIZE Uncharacterized protein OS=Zea mays OX=4577 GN=100277025 PE=2 SV=1	4.9412	19.6	2	2	22.5935	NaN	NaN	NaN	NaN	NaN	NaN	NaN	22.918	NaN	NaN	NaN	NaN	NaN	NaN	NaN				2	19.6	19.6	16.472	26754000	3
tr|B6TN44|B6TN44_MAIZE 26S proteasome non-ATPase regulatory subunit 9 OS=Zea mays OX=4577 GN=100272678 PE=2 SV=1	20.576	31.5	4	4	NaN	NaN	NaN	NaN	NaN	NaN	NaN	NaN	NaN	NaN	NaN	23.0427	NaN	NaN	22.4784	NaN	biological regulation;biosynthetic process;catabolic process;cell cycle process;cellular biosynthetic process;cellular catabolic process;cellular component assembly;cellular component assembly at cellular level;cellular component organization;cellular component organization at cellular level;cellular component organization or biogenesis;cellular component organization or biogenesis at cellular le…		cell part;intracellular part;macromolecular complex;proteasome complex;protein complex	4	31.5	31.5	23.138	176190000	34
tr|B6TNS1|B6TNS1_MAIZE Xyloglucan endotransglucosylase/hydrolase protein 5 OS=Zea mays OX=4577 GN=100283976 PE=2 SV=1	52.86	40.4	5	5	NaN	NaN	NaN	NaN	NaN	NaN	NaN	22.7792	NaN	NaN	NaN	NaN	NaN	NaN	NaN	NaN	carbohydrate metabolic process;metabolic process;primary metabolic process	catalytic activity;hydrolase activity;hydrolase activity, acting on glycosyl bonds;hydrolase activity, hydrolyzing O-glycosyl compounds		5	40.4	40.4	27.394	745360000	39
tr|B6TPA4|B6TPA4_MAIZE Carnitine racemase/ catalytic OS=Zea mays OX=4577 GN=100284027 PE=2 SV=1	6.7984	20.2	4	4	NaN	24.6663	NaN	NaN	23.5425	NaN	NaN	NaN	23.3535	23.4879	NaN	NaN	NaN	NaN	NaN	NaN		catalytic activity		4	20.2	20.2	25.657	194910000	23
tr|B6TSP3|B6TSP3_MAIZE Zinc finger C-x8-C-x5-C-x3-H type family protein OS=Zea mays OX=4577 GN=100284355 PE=2 SV=1;tr|C0P6K6|C0P6K6_MAIZE Zinc finger CCCH domain-containing protein 52 OS=Zea mays OX=4577 GN=100284355 PE=2 SV=1;tr|A0A1D6P4T1|A0A1D6P4T1_MAIZ	21.66	37.6	6	11	22.707	22.5952	NaN	21.9841	NaN	NaN	NaN	NaN	22.0705	22.4212	22.8853	22.2554	22.4176	21.7954	NaN	21.9524		binding;cation binding;ion binding;metal ion binding;nucleic acid binding;RNA binding		6	20.5	20.5	31.549	269080000	39
tr|B6TT00|B6TT00_MAIZE Endochitinase PR4 OS=Zea mays OX=4577 GN=100284387 PE=2 SV=1	50.788	12.5	2	2	NaN	22.4895	NaN	NaN	NaN	NaN	NaN	NaN	NaN	NaN	NaN	NaN	NaN	22.1264	NaN	NaN	amine metabolic process;aminoglycan catabolic process;aminoglycan metabolic process;carbohydrate catabolic process;carbohydrate metabolic process;catabolic process;cell wall macromolecule catabolic process;cell wall macromolecule metabolic process;chitin catabolic process;chitin metabolic process;macromolecule catabolic process;macromolecule metabolic process;metabolic process;nitrogen compound m…	binding;carbohydrate binding;catalytic activity;chitin binding;chitinase activity;hydrolase activity;hydrolase activity, acting on glycosyl bonds;hydrolase activity, hydrolyzing O-glycosyl compounds;pattern binding;polysaccharide binding		2	12.5	12.5	28.564	258300000	29
tr|B6TT66|B6TT66_MAIZE Ribosome-like protein OS=Zea mays OX=4577 GN=100284221 PE=2 SV=1	30.283	27.3	2	6	NaN	NaN	NaN	NaN	NaN	NaN	NaN	NaN	26.6602	NaN	NaN	NaN	NaN	NaN	NaN	NaN	biosynthetic process;cellular biosynthetic process;cellular macromolecule biosynthetic process;cellular macromolecule metabolic process;cellular metabolic process;cellular process;cellular protein metabolic process;macromolecule biosynthetic process;macromolecule metabolic process;metabolic process;primary metabolic process;protein metabolic process;translation	structural constituent of ribosome;structural molecule activity	cell part;cytoplasmic part;intracellular non-membrane-bounded organelle;intracellular organelle;intracellular part;macromolecular complex;non-membrane-bounded organelle;organelle;ribonucleoprotein complex;ribosome	2	14.4	14.4	15.918	223460000	4
tr|B6TV55|B6TV55_MAIZE Stem 28 kDa glycoprotein OS=Zea mays OX=4577 GN=100284565 PE=2 SV=1	13.176	26.6	5	5	NaN	23.695	22.4286	NaN	NaN	23.5352	NaN	NaN	NaN	NaN	NaN	NaN	NaN	NaN	NaN	NaN		acid phosphatase activity;catalytic activity;hydrolase activity;hydrolase activity, acting on ester bonds;phosphatase activity;phosphoric ester hydrolase activity		5	26.6	26.6	32.09	182160000	21
tr|B6TWA5|B6TWA5_MAIZE Phenolic glucoside malonyltransferase 1 OS=Zea mays OX=4577 GN=100284673 PE=2 SV=1	3.3614	14.8	4	4	NaN	NaN	NaN	NaN	NaN	23.7778	NaN	NaN	NaN	NaN	NaN	NaN	NaN	NaN	NaN	NaN		catalytic activity;transferase activity;transferase activity, transferring acyl groups;transferase activity, transferring acyl groups other than amino-acyl groups		4	14.8	14.8	50.784	28416000	4
tr|B6TXK4|B6TXK4_MAIZE Acetolactate synthase/ amino acid binding protein OS=Zea mays OX=4577 GN=100284799 PE=2 SV=1	2.194	11.2	1	6	NaN	NaN	NaN	NaN	NaN	NaN	NaN	NaN	NaN	NaN	NaN	NaN	NaN	NaN	NaN	20.5705	amine biosynthetic process;amine metabolic process;biosynthetic process;branched chain family amino acid biosynthetic process;branched chain family amino acid metabolic process;carboxylic acid biosynthetic process;carboxylic acid metabolic process;cellular amine metabolic process;cellular amino acid biosynthetic process;cellular amino acid metabolic process;cellular biosynthetic process;cellular …	acetolactate synthase activity;amine binding;amino acid binding;binding;carboxylic acid binding;catalytic activity;transferase activity;transferase activity, transferring aldehyde or ketonic groups		2	4.8	2.3	52.301	7720100	1
tr|B6TXX0|B6TXX0_MAIZE Ribose-phosphate pyrophosphokinase 4 OS=Zea mays OX=4577 GN=ZEAMMB73_Zm00001d017833 PE=2 SV=1	323.31	62.8	5	15	22.7245	23.6007	NaN	NaN	NaN	NaN	NaN	NaN	23.1419	22.5686	NaN	22.0048	NaN	NaN	22.0108	NaN	cellular metabolic process;cellular nitrogen compound metabolic process;cellular process;metabolic process;nitrogen compound metabolic process;nucleobase-containing compound metabolic process;nucleobase-containing small molecule metabolic process;nucleoside metabolic process;primary metabolic process;small molecule metabolic process	catalytic activity;kinase activity;transferase activity;transferase activity, transferring phosphorus-containing groups		15	62.8	19.7	36.193	554690000	35
tr|B6TYE1|B6TYE1_MAIZE Myosin-like protein OS=Zea mays OX=4577 GN=100284881 PE=2 SV=1;tr|A0A1D6L9C2|A0A1D6L9C2_MAIZE Protein FLC EXPRESSOR OS=Zea mays OX=4577 GN=100284881 PE=4 SV=1	11.174	38.4	4	8	23.1321	23.474	NaN	NaN	NaN	NaN	NaN	NaN	NaN	NaN	NaN	NaN	NaN	NaN	NaN	NaN				8	38.4	21.7	34.386	164700000	10
tr|B6TZ58|B6TZ58_MAIZE VAMP protein SEC22 OS=Zea mays OX=4577 GN=100284961 PE=2 SV=1	2.9709	9.9	2	2	NaN	NaN	NaN	NaN	23.9497	NaN	NaN	24.5587	NaN	NaN	NaN	NaN	NaN	NaN	NaN	NaN				2	9.9	9.9	23.251	94945000	14
tr|B6TZE6|B6TZE6_MAIZE Pectinesterase 31 OS=Zea mays OX=4577 GN=100284984 PE=2 SV=1	3.3723	10.8	2	2	NaN	NaN	NaN	23.806	NaN	NaN	NaN	NaN	NaN	23.8153	23.5705	NaN	NaN	NaN	NaN	NaN	cell wall modification;cell wall organization;cell wall organization or biogenesis;cellular component organization or biogenesis	aspartyl esterase activity;carboxylic ester hydrolase activity;catalytic activity;hydrolase activity;hydrolase activity, acting on ester bonds;pectinesterase activity	cell part;cell wall;external encapsulating structure	2	10.8	10.8	36.115	372580000	18
tr|B6U0U2|B6U0U2_MAIZE VHS domain-containing protein OS=Zea mays OX=4577 GN=100277859 PE=2 SV=1;tr|A0A1D6FH79|A0A1D6FH79_MAIZE VHS domain-containing protein OS=Zea mays OX=4577 GN=100277859 PE=4 SV=1	70.032	24.1	2	12	NaN	NaN	NaN	NaN	NaN	NaN	NaN	NaN	NaN	NaN	NaN	NaN	23.2587	NaN	NaN	NaN	establishment of localization;establishment of localization in cell;establishment of protein localization;intracellular protein transport;intracellular transport;protein transport;transport			2	4.8	4.8	74.258	200170000	20
tr|B6U272|B6U272_MAIZE S-adenosyl-L-methionine-dependent methyltransferase superfamily protein OS=Zea mays OX=4577 GN=100277948 PE=2 SV=1	4.7753	14.8	3	3	NaN	NaN	NaN	NaN	NaN	NaN	NaN	NaN	NaN	23.8916	NaN	24.7907	NaN	NaN	NaN	NaN				3	14.8	14.8	36.285	146750000	5
tr|B6U284|B6U284_MAIZE 14-3-3-like protein OS=Zea mays OX=4577 GN=100285226 PE=2 SV=1	195.34	81.6	2	26	NaN	24.0875	23.2482	NaN	NaN	NaN	NaN	NaN	NaN	NaN	23.27	NaN	NaN	NaN	NaN	NaN				18	72.7	11.7	28.864	316870000	18
tr|B6U666|B6U666_MAIZE Fructokinase-1 OS=Zea mays OX=4577 GN=ZEAMMB73_Zm00001d012173 PE=2 SV=1	16.539	66.9	6	20	NaN	NaN	24.1922	NaN	NaN	NaN	NaN	NaN	NaN	NaN	NaN	24.0897	NaN	NaN	NaN	NaN	alcohol metabolic process;carbohydrate metabolic process;cellular carbohydrate metabolic process;cellular metabolic process;cellular process;D-ribose metabolic process;heterocycle metabolic process;metabolic process;monosaccharide metabolic process;pentose metabolic process;primary metabolic process;small molecule metabolic process	carbohydrate kinase activity;catalytic activity;kinase activity;phosphotransferase activity, alcohol group as acceptor;ribokinase activity;transferase activity;transferase activity, transferring phosphorus-containing groups		6	26.6	26.6	34.603	214850000	12
tr|B6U892|B6U892_MAIZE Dihydroorotate dehydrogenase (quinone), mitochondrial OS=Zea mays OX=4577 GN=100285695 PE=2 SV=1	5.6094	11.7	4	4	NaN	24.6037	24.5505	NaN	NaN	NaN	NaN	22.4056	NaN	NaN	NaN	NaN	NaN	NaN	NaN	NaN	biosynthetic process;cellular aromatic compound metabolic process;cellular biosynthetic process;cellular metabolic process;cellular nitrogen compound biosynthetic process;cellular nitrogen compound metabolic process;cellular process;'de novo' pyrimidine base biosynthetic process;'de novo' UMP biosynthetic process;heterocycle biosynthetic process;heterocycle metabolic process;metabolic process;nit…	catalytic activity;dihydroorotate dehydrogenase activity;oxidoreductase activity;oxidoreductase activity, acting on the CH-CH group of donors;oxidoreductase activity, acting on the CH-CH group of donors, quinone or related compound as acceptor	cell part;cytoplasmic part;intracellular organelle part;intracellular part;membrane;mitochondrial inner membrane;mitochondrial membrane;mitochondrial part;organelle inner membrane;organelle membrane;organelle part	4	11.7	11.7	49.547	286030000	12
tr|B6U9I3|B6U9I3_MAIZE Eukaryotic translation initiation factor 3 subunit J OS=Zea mays OX=4577 GN=100281725 PE=2 SV=1;tr|A0A1D6QTH8|A0A1D6QTH8_MAIZE Eukaryotic translation initiation factor 3 subunit J OS=Zea mays OX=4577 GN=100281725 PE=3 SV=1	144.97	62.1	1	13	NaN	NaN	NaN	NaN	NaN	NaN	NaN	NaN	NaN	NaN	NaN	NaN	NaN	NaN	NaN	23.2604	biological regulation;cellular component assembly;cellular component assembly at cellular level;cellular component organization;cellular component organization at cellular level;cellular component organization or biogenesis;cellular component organization or biogenesis at cellular level;cellular macromolecular complex assembly;cellular macromolecular complex subunit organization;cellular process;…	binding;nucleic acid binding;RNA binding;translation factor activity, nucleic acid binding;translation initiation factor activity	cell part;cytoplasmic part;eukaryotic 43S preinitiation complex;eukaryotic 48S preinitiation complex;eukaryotic translation initiation factor 3 complex;intracellular part;macromolecular complex;protein complex;ribonucleoprotein complex;translation preinitiation complex	13	62.1	7.3	26.025	44601000	1
tr|B6UB08|B6UB08_MAIZE Uncharacterized protein OS=Zea mays OX=4577 GN=100278585 PE=2 SV=1	3.3738	9.4	2	2	NaN	NaN	NaN	NaN	NaN	NaN	NaN	NaN	NaN	23.287	NaN	NaN	NaN	NaN	NaN	NaN				2	9.4	9.4	28.494	133780000	11
tr|B6UB52|B6UB52_MAIZE Cysteine synthase OS=Zea mays OX=4577 GN=100502310 PE=2 SV=1	5.1367	17.3	4	4	NaN	NaN	23.6127	23.6154	NaN	23.6009	NaN	NaN	NaN	NaN	NaN	NaN	NaN	NaN	NaN	NaN	amine biosynthetic process;amine metabolic process;biosynthetic process;carboxylic acid biosynthetic process;carboxylic acid metabolic process;cellular amine metabolic process;cellular amino acid biosynthetic process;cellular amino acid metabolic process;cellular biosynthetic process;cellular ketone metabolic process;cellular metabolic process;cellular nitrogen compound biosynthetic process;cellu…	carbon-oxygen lyase activity;catalytic activity;cysteine synthase activity;lyase activity		4	17.3	17.3	36.65	68918000	7
tr|B6UCF0|B6UCF0_MAIZE 50S ribosomal protein L6 OS=Zea mays OX=4577 GN=100285964 PE=2 SV=1	18.746	55.3	2	10	NaN	23.6367	23.607	NaN	NaN	NaN	NaN	NaN	25.2422	NaN	NaN	24.4925	NaN	NaN	NaN	NaN	biosynthetic process;cellular biosynthetic process;cellular macromolecule biosynthetic process;cellular macromolecule metabolic process;cellular metabolic process;cellular process;cellular protein metabolic process;macromolecule biosynthetic process;macromolecule metabolic process;metabolic process;primary metabolic process;protein metabolic process;translation	binding;nucleic acid binding;RNA binding;rRNA binding;structural constituent of ribosome;structural molecule activity	cell part;cytoplasmic part;intracellular non-membrane-bounded organelle;intracellular organelle;intracellular part;macromolecular complex;non-membrane-bounded organelle;organelle;ribonucleoprotein complex;ribosome	2	16.4	16.4	24.902	70217000	6
tr|B6UDC2|B6UDC2_MAIZE Actin-interacting protein 1-2 OS=Zea mays OX=4577 GN=100192950 PE=2 SV=1;tr|A0A1D6MMD9|A0A1D6MMD9_MAIZE Actin-interacting protein 1-2 OS=Zea mays OX=4577 GN=100192950 PE=4 SV=1	36.639	57.7	5	28	NaN	NaN	NaN	NaN	NaN	NaN	23.819	24.8128	NaN	NaN	NaN	NaN	NaN	NaN	NaN	NaN				5	15.6	15.6	66.286	534880000	24
tr|B6UEL1|B6UEL1_MAIZE Germin-like protein subfamily 1 member 11 OS=Zea mays OX=4577 GN=100286113 PE=2 SV=1;tr|A0A1X7YDQ9|A0A1X7YDQ9_MAIZE Uncharacterized protein OS=Zea mays OX=4577 GN=103641119 PE=3 SV=1	27.757	25.8	4	5	NaN	NaN	NaN	NaN	NaN	NaN	NaN	NaN	24.2431	NaN	NaN	NaN	NaN	NaN	NaN	NaN		binding;cation binding;ion binding;manganese ion binding;metal ion binding;nutrient reservoir activity;transition metal ion binding	extracellular region	5	25.8	25.8	24.25	613510000	35
tr|B6UHI4|B6UHI4_MAIZE Vacuolar ATP synthase subunit B isoform 1 OS=Zea mays OX=4577 GN=100286306 PE=2 SV=1;tr|A0A1D6P248|A0A1D6P248_MAIZE Vacuolar proton pump2 OS=Zea mays OX=4577 GN=100286306 PE=3 SV=1;tr|A0A1D6P249|A0A1D6P249_MAIZE Vacuolar proton pump2	323.31	91.4	2	48	NaN	NaN	NaN	NaN	NaN	NaN	NaN	NaN	NaN	NaN	NaN	NaN	NaN	NaN	23.547	23.3083	ATP hydrolysis coupled proton transport;ATP metabolic process;cation transport;cellular metabolic process;cellular nitrogen compound metabolic process;cellular process;energy coupled proton transport, against electrochemical gradient;establishment of localization;heterocycle metabolic process;hydrogen transport;ion transmembrane transport;ion transport;metabolic process;monovalent inorganic catio…	adenyl nucleotide binding;adenyl ribonucleotide binding;ATP binding;binding;catalytic activity;hydrolase activity;hydrolase activity, acting on acid anhydrides;hydrolase activity, acting on acid anhydrides, catalyzing transmembrane movement of substances;nucleotide binding;purine nucleotide binding;purine ribonucleoside triphosphate binding;purine ribonucleotide binding;ribonucleotide binding;tra…	cell part;macromolecular complex;membrane part;protein complex;proton-transporting two-sector ATPase complex, catalytic domain;proton-transporting V-type ATPase, V1 domain	48	91.4	4.3	54.088	173700000	23
tr|B6UIC1|B6UIC1_MAIZE 50S ribosomal protein L12-1 OS=Zea mays OX=4577 GN=100277261 PE=2 SV=1	5.344	22.4	2	3	23.4127	NaN	NaN	NaN	NaN	NaN	NaN	NaN	24.5824	NaN	NaN	NaN	NaN	NaN	NaN	NaN	biosynthetic process;cellular biosynthetic process;cellular macromolecule biosynthetic process;cellular macromolecule metabolic process;cellular metabolic process;cellular process;cellular protein metabolic process;macromolecule biosynthetic process;macromolecule metabolic process;metabolic process;primary metabolic process;protein metabolic process;translation	structural constituent of ribosome;structural molecule activity	cell part;cytoplasmic part;intracellular non-membrane-bounded organelle;intracellular organelle;intracellular part;macromolecular complex;non-membrane-bounded organelle;organelle;ribonucleoprotein complex;ribosome	3	22.4	15.3	18.858	56149000	2
tr|B7ZWU6|B7ZWU6_MAIZE Pyruvate dehydrogenase E1 component subunit beta OS=Zea mays OX=4577 PE=2 SV=1	52.845	32.9	2	9	NaN	NaN	NaN	NaN	NaN	NaN	NaN	NaN	NaN	NaN	NaN	NaN	NaN	NaN	24.9777	24.5206		catalytic activity		9	32.9	9.7	35.127	205510000	24
tr|B7ZX71|B7ZX71_MAIZE Aspartate--tRNA ligase 2 cytoplasmic OS=Zea mays OX=4577 GN=100279253 PE=2 SV=1;tr|A0A1D6FGX9|A0A1D6FGX9_MAIZE Aspartate--tRNA ligase 2 cytoplasmic OS=Zea mays OX=4577 GN=100279253 PE=3 SV=1;tr|A0A1D6FGX7|A0A1D6FGX7_MAIZE Aspartate--	14.362	39.8	5	18	NaN	NaN	NaN	NaN	NaN	NaN	NaN	NaN	NaN	NaN	NaN	23.8041	NaN	23.417	NaN	NaN	amine metabolic process;amino acid activation;aspartyl-tRNA aminoacylation;carboxylic acid metabolic process;cellular amine metabolic process;cellular amino acid metabolic process;cellular ketone metabolic process;cellular macromolecule metabolic process;cellular metabolic process;cellular nitrogen compound metabolic process;cellular process;macromolecule metabolic process;metabolic process;ncRNA…	adenyl nucleotide binding;adenyl ribonucleotide binding;aminoacyl-tRNA ligase activity;aspartate-tRNA ligase activity;ATP binding;binding;catalytic activity;ligase activity;ligase activity, forming aminoacyl-tRNA and related compounds;ligase activity, forming carbon-oxygen bonds;nucleic acid binding;nucleotide binding;purine nucleotide binding;purine ribonucleoside triphosphate binding;purine rib…	cell part;cytoplasm;intracellular part	5	15	15	60.64	370600000	16
tr|B7ZXU2|B7ZXU2_MAIZE Serrate RNA effector molecule OS=Zea mays OX=4577 GN=100279372 PE=2 SV=1	155.48	24.3	5	13	NaN	NaN	NaN	NaN	NaN	NaN	NaN	NaN	NaN	NaN	NaN	NaN	NaN	NaN	NaN	22.7234		binding;cation binding;ion binding;metal ion binding		13	24.3	12.8	82.182	226950000	19
tr|B7ZYD3|B7ZYD3_MAIZE Phosphoribosylamine--glycine ligase chloroplastic OS=Zea mays OX=4577 GN=100281518 PE=2 SV=1;tr|A0A1D6MBC9|A0A1D6MBC9_MAIZE Phosphoribosylamine--glycine ligase chloroplastic OS=Zea mays OX=4577 GN=100281518 PE=3 SV=1;tr|A0A1D6MBD6|A0	44.559	25.2	4	8	NaN	NaN	NaN	NaN	NaN	NaN	NaN	NaN	NaN	NaN	NaN	NaN	24.054	NaN	NaN	NaN	biosynthetic process;cellular aromatic compound metabolic process;cellular biosynthetic process;cellular metabolic process;cellular nitrogen compound biosynthetic process;cellular nitrogen compound metabolic process;cellular process;heterocycle metabolic process;metabolic process;nitrogen compound metabolic process;nucleobase biosynthetic process;nucleobase metabolic process;nucleobase-containing…	adenyl nucleotide binding;adenyl ribonucleotide binding;ATP binding;binding;catalytic activity;cation binding;ion binding;ligase activity;ligase activity, forming carbon-nitrogen bonds;metal ion binding;nucleotide binding;phosphoribosylamine-glycine ligase activity;purine nucleotide binding;purine ribonucleoside triphosphate binding;purine ribonucleotide binding;ribonucleotide binding		8	25.2	11.7	54.901	337120000	9
tr|A0A1D6LTK6|A0A1D6LTK6_MAIZE Alpha-glucan water dikinase 1 chloroplastic OS=Zea mays OX=4577 GN=100381411 PE=4 SV=1;tr|A0A1D6LTL9|A0A1D6LTL9_MAIZE Alpha-glucan water dikinase 1 chloroplastic OS=Zea mays OX=4577 GN=100381411 PE=4 SV=1;tr|A0A1D6LTL5|A0A1D6	246.81	38.1	44	44	27.2976	27.1318	27.4005	27.2466	27.3226	26.6252	27.4521	28.603	28.6307	29.4916	29.1092	29.0524	30.1064	29.2314	26.7877	28.5621				44	38.1	38.1	161.88	5191100000	277
tr|B7ZYS9|B7ZYS9_MAIZE La-related protein 1C OS=Zea mays OX=4577 GN=100279569 PE=2 SV=1;tr|A0A1D6GCS8|A0A1D6GCS8_MAIZE La-related protein 1C OS=Zea mays OX=4577 GN=100279569 PE=4 SV=1	48.331	28.3	5	5	NaN	NaN	NaN	NaN	NaN	NaN	NaN	NaN	NaN	23.3628	23.7772	NaN	NaN	23.2274	NaN	NaN				5	28.3	28.3	47.172	457440000	52
tr|B7ZYW2|B7ZYW2_MAIZE Putative clathrin assembly protein OS=Zea mays OX=4577 GN=100279582 PE=2 SV=1	25.239	20.2	3	10	NaN	NaN	NaN	NaN	NaN	NaN	NaN	23.3756	NaN	NaN	NaN	NaN	NaN	NaN	NaN	NaN	cellular component assembly;cellular component assembly at cellular level;cellular component organization;cellular component organization at cellular level;cellular component organization or biogenesis;cellular component organization or biogenesis at cellular level;cellular macromolecular complex assembly;cellular macromolecular complex subunit organization;cellular process;cellular protein compl…	1-phosphatidylinositol binding;binding;lipid binding;phosphatidylinositol binding;phospholipid binding	cell part;clathrin-coated vesicle;coated vesicle;cytoplasmic membrane-bounded vesicle;cytoplasmic part;cytoplasmic vesicle;intracellular membrane-bounded organelle;intracellular organelle;intracellular part;membrane-bounded organelle;membrane-bounded vesicle;organelle;vesicle	10	20.2	8.3	70.627	322770000	36
tr|B8A046|B8A046_MAIZE Phenylalanine ammonia-lyase OS=Zea mays OX=4577 GN=542258 PE=2 SV=1;tr|A0A1D6HDL0|A0A1D6HDL0_MAIZE Phenylalanine ammonia-lyase OS=Zea mays OX=4577 GN=542258 PE=3 SV=1;tr|A0A1D6HDL1|A0A1D6HDL1_MAIZE Phenylalanine ammonia-lyase OS=Zea	323.31	68.7	7	49	NaN	25.3871	27.0905	NaN	NaN	NaN	NaN	NaN	24.5815	22.5385	24.5096	25.4575	24.4649	NaN	25.1745	23.5223	amine catabolic process;amine metabolic process;aromatic amino acid family catabolic process;aromatic amino acid family metabolic process;aromatic compound biosynthetic process;aromatic compound catabolic process;biosynthetic process;carboxylic acid catabolic process;carboxylic acid metabolic process;catabolic process;cellular amine metabolic process;cellular amino acid catabolic process;cellular…	ammonia-lyase activity;carbon-nitrogen lyase activity;catalytic activity;lyase activity;phenylalanine ammonia-lyase activity	cell part;cytoplasm;intracellular part	49	68.7	13.4	75.463	2534000000	68
tr|B8A068|B8A068_MAIZE S-adenosylmethionine synthase OS=Zea mays OX=4577 GN=100279822 PE=2 SV=1	323.31	87.9	3	43	NaN	NaN	25.4776	NaN	NaN	NaN	NaN	NaN	24.2912	NaN	NaN	NaN	NaN	NaN	NaN	NaN	amine biosynthetic process;amine metabolic process;biosynthetic process;carboxylic acid biosynthetic process;carboxylic acid metabolic process;cellular amine metabolic process;cellular amino acid biosynthetic process;cellular amino acid metabolic process;cellular biosynthetic process;cellular ketone metabolic process;cellular metabolic process;cellular modified amino acid biosynthetic process;cel…	adenyl nucleotide binding;adenyl ribonucleotide binding;ATP binding;binding;catalytic activity;cation binding;ion binding;metal ion binding;methionine adenosyltransferase activity;nucleotide binding;purine nucleotide binding;purine ribonucleoside triphosphate binding;purine ribonucleotide binding;ribonucleotide binding;transferase activity;transferase activity, transferring alkyl or aryl (other t…		43	87.9	3.5	43.072	4193400000	33
tr|B8A0R6|B8A0R6_MAIZE 3-ketoacyl-CoA synthase OS=Zea mays OX=4577 GN=100279934 PE=2 SV=1;tr|B4F9Z5|B4F9Z5_MAIZE 3-ketoacyl-CoA synthase OS=Zea mays OX=4577 GN=100191738 PE=2 SV=1	4.1223	4.3	2	2	NaN	NaN	NaN	NaN	NaN	NaN	NaN	NaN	NaN	NaN	23.049	NaN	22.764	NaN	NaN	NaN	biosynthetic process;carboxylic acid biosynthetic process;carboxylic acid metabolic process;cellular biosynthetic process;cellular ketone metabolic process;cellular lipid metabolic process;cellular metabolic process;cellular process;fatty acid biosynthetic process;fatty acid metabolic process;lipid biosynthetic process;lipid metabolic process;metabolic process;monocarboxylic acid metabolic proces…	catalytic activity;transferase activity;transferase activity, transferring acyl groups;transferase activity, transferring acyl groups other than amino-acyl groups	cell part;membrane	2	4.3	4.3	54.461	52161000	2
tr|A0A1D6LLS4|A0A1D6LLS4_MAIZE 2-oxoglutarate dehydrogenase E1 component OS=Zea mays OX=4577 GN=ZEAMMB73_Zm00001d036328 PE=4 SV=1;tr|A0A1D6LLS5|A0A1D6LLS5_MAIZE 2-oxoglutarate dehydrogenase E1 component OS=Zea mays OX=4577 GN=ZEAMMB73_Zm00001d036328 PE=4 S	323.31	44.7	26	41	NaN	NaN	22.7791	NaN	22.9088	23.3008	24.8334	24.9578	22.2382	22.7691	NaN	22.4936	NaN	24.4239	23.1685	NaN				27	34.9	33.6	114.81	3906500000	195
tr|B8A1R0|B8A1R0_MAIZE Putative beta-D-xylosidase 5 OS=Zea mays OX=4577 GN=100280070 PE=2 SV=1	17.378	15.4	7	7	NaN	NaN	NaN	NaN	NaN	23.8423	NaN	NaN	NaN	NaN	NaN	NaN	NaN	NaN	NaN	NaN	carbohydrate metabolic process;metabolic process;primary metabolic process	catalytic activity;hydrolase activity;hydrolase activity, acting on glycosyl bonds;hydrolase activity, hydrolyzing O-glycosyl compounds		7	15.4	15.4	89.473	295100000	20
tr|C0HFL6|C0HFL6_MAIZE NADPH--cytochrome P450 reductase OS=Zea mays OX=4577 GN=100304425 PE=2 SV=1;tr|A0A1D6JG74|A0A1D6JG74_MAIZE NADPH--cytochrome P450 reductase OS=Zea mays OX=4577 GN=100304425 PE=4 SV=1	12.353	18.4	1	8	NaN	NaN	NaN	NaN	NaN	NaN	NaN	NaN	NaN	NaN	NaN	NaN	NaN	NaN	NaN	21.4016		binding;catalytic activity;cation binding;coenzyme binding;cofactor binding;FMN binding;ion binding;iron ion binding;metal ion binding;NADPH-hemoprotein reductase activity;nucleotide binding;oxidoreductase activity;oxidoreductase activity, acting on NADH or NADPH;oxidoreductase activity, acting on NADH or NADPH, heme protein as acceptor;transition metal ion binding	cell part;cytoplasmic part;endoplasmic reticulum membrane;endoplasmic reticulum part;intracellular organelle part;intracellular part;membrane;membrane part;organelle membrane;organelle part	8	18.4	1.9	76.41	20882000	3
tr|C0HH81|C0HH81_MAIZE NAD(P)-binding Rossmann-fold superfamily protein OS=Zea mays OX=4577 GN=100381586 PE=2 SV=1	22.874	14.3	2	3	NaN	NaN	NaN	NaN	20.2821	NaN	NaN	NaN	NaN	NaN	NaN	NaN	NaN	NaN	NaN	NaN				3	14.3	9.5	36.254	4636500	3
tr|C0HHM6|C0HHM6_MAIZE Thioredoxin family protein OS=Zea mays OX=4577 GN=103643192 PE=2 SV=1;tr|A0A1D6KMJ5|A0A1D6KMJ5_MAIZE Thioredoxin family protein OS=Zea mays OX=4577 GN=103643192 PE=4 SV=1;tr|A0A1D6KMJ7|A0A1D6KMJ7_MAIZE Thioredoxin family protein OS=Z	46.538	18.6	2	4	NaN	23.8819	24.4737	NaN	NaN	24.1753	NaN	NaN	24.6615	23.6072	NaN	25.1577	NaN	NaN	NaN	NaN	biological regulation;cell redox homeostasis;cellular homeostasis;cellular process;homeostatic process;regulation of biological process;regulation of biological quality;regulation of cellular process	catalytic activity;disulfide oxidoreductase activity;electron carrier activity;oxidoreductase activity;oxidoreductase activity, acting on a sulfur group of donors;protein disulfide oxidoreductase activity		4	18.6	10.2	37.465	163540000	19
tr|C0HHR4|C0HHR4_MAIZE Actin-7 OS=Zea mays OX=4577 GN=100381643 PE=2 SV=1	213.88	85.4	1	42	NaN	NaN	NaN	NaN	NaN	NaN	NaN	NaN	24.4699	NaN	NaN	NaN	NaN	NaN	NaN	NaN		adenyl nucleotide binding;adenyl ribonucleotide binding;ATP binding;binding;nucleotide binding;purine nucleotide binding;purine ribonucleoside triphosphate binding;purine ribonucleotide binding;ribonucleotide binding		16	37.7	5	41.711	233700000	15
tr|A0A096QLU9|A0A096QLU9_MAIZE Heterogeneous nuclear ribonucleoprotein A3-like protein 2 OS=Zea mays OX=4577 GN=100284566 PE=4 SV=1	296.64	54.6	12	24	27.0171	26.0624	24.5432	27.1558	25.4562	25.639	27.7227	27.2988	24.5585	25.2306	25.8463	23.3985	25.6778	26.3761	25.8582	26.1938		binding;nucleic acid binding;nucleotide binding		12	35.8	35.8	44.557	3462200000	210
tr|C0P3B4|C0P3B4_MAIZE Pentatricopeptide repeat-containing protein OS=Zea mays OX=4577 GN=100381976 PE=2 SV=1;tr|A0A1D6QHB6|A0A1D6QHB6_MAIZE Pentatricopeptide repeat-containing protein OS=Zea mays OX=4577 GN=100381976 PE=4 SV=1	32.112	47.2	9	9	NaN	NaN	24.1577	NaN	NaN	NaN	NaN	NaN	NaN	NaN	NaN	23.9924	NaN	NaN	NaN	NaN		catalytic activity		9	47.2	47.2	26.235	432040000	34
tr|C0P3V1|C0P3V1_MAIZE G-type lectin S-receptor-like serine/threonine-protein kinase SD2-5 OS=Zea mays OX=4577 GN=100382042 PE=2 SV=1	18.806	10.5	3	3	NaN	NaN	NaN	NaN	NaN	NaN	NaN	NaN	NaN	NaN	NaN	NaN	NaN	22.9368	NaN	NaN		binding;carbohydrate binding		3	10.5	10.5	48.814	207020000	24
tr|C0P429|C0P429_MAIZE UTP--glucose-1-phosphate uridylyltransferase OS=Zea mays OX=4577 GN=100382295 PE=2 SV=1	81.849	57.4	16	27	NaN	22.9906	23.5991	NaN	NaN	NaN	NaN	NaN	NaN	NaN	NaN	NaN	NaN	NaN	NaN	NaN	alcohol metabolic process;carbohydrate metabolic process;cellular carbohydrate metabolic process;cellular metabolic process;cellular nitrogen compound metabolic process;cellular process;glucose metabolic process;hexose metabolic process;metabolic process;monosaccharide metabolic process;nitrogen compound metabolic process;nucleobase-containing compound metabolic process;nucleotide-sugar metabolic…	catalytic activity;nucleotidyltransferase activity;transferase activity;transferase activity, transferring phosphorus-containing groups;uridylyltransferase activity;UTP:glucose-1-phosphate uridylyltransferase activity;UTP-monosaccharide-1-phosphate uridylyltransferase activity		17	39	39	51.358	1269400000	81
tr|C0P567|C0P567_MAIZE Pyrophosphate--fructose 6-phosphate 1-phosphotransferase subunit beta OS=Zea mays OX=4577 GN=100382182 PE=2 SV=1;tr|A0A1D6LW53|A0A1D6LW53_MAIZE Phosphofructose kinase1 OS=Zea mays OX=4577 GN=100382182 PE=4 SV=1;tr|A0A1D6LW52|A0A1D6LW	83.305	70.9	5	30	NaN	NaN	24.1723	NaN	NaN	NaN	NaN	NaN	NaN	NaN	NaN	NaN	NaN	NaN	24.7724	NaN	alcohol catabolic process;alcohol metabolic process;carbohydrate catabolic process;carbohydrate metabolic process;catabolic process;cellular carbohydrate catabolic process;cellular carbohydrate metabolic process;cellular metabolic process;cellular process;fructose 6-phosphate metabolic process;fructose metabolic process;generation of precursor metabolites and energy;glucose catabolic process;gluc…	6-phosphofructokinase activity;adenyl nucleotide binding;adenyl ribonucleotide binding;ATP binding;binding;carbohydrate kinase activity;catalytic activity;cation binding;diphosphate-fructose-6-phosphate 1-phosphotransferase activity;ion binding;kinase activity;metal ion binding;nucleotide binding;phosphofructokinase activity;phosphotransferase activity, alcohol group as acceptor;purine nucleotide…	cell part;cytoplasm;intracellular part	5	15.4	15.4	61.051	1129800000	38
tr|C0P5G0|C0P5G0_MAIZE Beta-amylase OS=Zea mays OX=4577 GN=100382206 PE=2 SV=1	8.1518	6.4	3	3	NaN	NaN	NaN	NaN	NaN	NaN	NaN	NaN	NaN	NaN	NaN	NaN	NaN	NaN	NaN	24.5495	carbohydrate catabolic process;carbohydrate metabolic process;catabolic process;macromolecule catabolic process;macromolecule metabolic process;metabolic process;polysaccharide catabolic process;polysaccharide metabolic process;primary metabolic process	amylase activity;beta-amylase activity;catalytic activity;hydrolase activity;hydrolase activity, acting on glycosyl bonds;hydrolase activity, hydrolyzing O-glycosyl compounds		3	6.4	6.4	65.293	318290000	4
tr|C0P5X3|C0P5X3_MAIZE Cytokinin riboside 5-monophosphate phosphoribohydrolase OS=Zea mays OX=4577 GN=100285847 PE=2 SV=1;tr|A0A1D6MBE4|A0A1D6MBE4_MAIZE Cytokinin riboside 5-monophosphate phosphoribohydrolase OS=Zea mays OX=4577 GN=100285847 PE=3 SV=1;tr	4.151	15.3	2	2	NaN	NaN	NaN	NaN	NaN	NaN	NaN	NaN	NaN	NaN	NaN	23.6728	NaN	NaN	NaN	NaN				2	15.3	15.3	24.824	199150000	5
tr|C0P5X6|C0P5X6_MAIZE Chloroplast ribulose bisphosphate carboxylase/oxygenase activase OS=Zea mays OX=4577 GN=100382265 PE=2 SV=1	14.234	25.9	2	13	23.3199	NaN	NaN	NaN	NaN	NaN	NaN	NaN	NaN	NaN	NaN	NaN	NaN	NaN	23.821	NaN		adenyl nucleotide binding;adenyl ribonucleotide binding;ATP binding;binding;nucleotide binding;purine nucleotide binding;purine ribonucleoside triphosphate binding;purine ribonucleotide binding;ribonucleotide binding		2	5.8	5.8	50.982	42687000	4
tr|C0PKK0|C0PKK0_MAIZE Putative mediator of RNA polymerase II transcription subunit 26c OS=Zea mays OX=4577 GN=100275944 PE=2 SV=1;tr|C0P608|C0P608_MAIZE MED26 transcription factor OS=Zea mays OX=4577 GN=100275944 PE=2 SV=1;tr|A0A1D6QMM7|A0A1D6QMM7_MAIZE P	3.6524	17.9	3	3	NaN	NaN	NaN	NaN	NaN	NaN	NaN	NaN	NaN	NaN	NaN	NaN	NaN	21.1495	NaN	NaN	biosynthetic process;cellular biosynthetic process;cellular macromolecule biosynthetic process;cellular macromolecule metabolic process;cellular metabolic process;cellular nitrogen compound metabolic process;cellular process;macromolecule biosynthetic process;macromolecule metabolic process;metabolic process;nitrogen compound metabolic process;nucleic acid metabolic process;nucleobase-containing …	binding;DNA binding;nucleic acid binding	cell part;intracellular membrane-bounded organelle;intracellular organelle;intracellular part;membrane-bounded organelle;nucleus;organelle	3	17.9	17.9	18.938	24389000	7
tr|O48554|O48554_MAIZE Glycine-rich RNA binding protein OS=Zea mays OX=4577 GN=GRP PE=2 SV=1	54.59	87.6	5	11	23.6013	25.2639	23.9365	23.6436	NaN	23.7082	NaN	NaN	26.0463	25.3617	NaN	NaN	NaN	24.6241	24.1143	NaN		binding;nucleic acid binding;nucleotide binding		5	59.3	59.3	14.728	765550000	60
tr|C0P642|C0P642_MAIZE Zinc finger CCCH domain-containing protein 58 OS=Zea mays OX=4577 GN=ZEAMMB73_Zm00001d040301 PE=2 SV=1;tr|A0A1D6MPU5|A0A1D6MPU5_MAIZE Zinc finger CCCH domain-containing protein 58 OS=Zea mays OX=4577 GN=ZEAMMB73_Zm00001d040301 PE=4 S	14.328	28.2	5	7	NaN	NaN	NaN	NaN	NaN	NaN	NaN	NaN	NaN	NaN	23.8425	NaN	NaN	NaN	NaN	NaN		binding;cation binding;ion binding;metal ion binding		7	28.2	23.3	48.436	190410000	16
tr|C0P676|C0P676_MAIZE SNF1-related protein kinase regulatory subunit gamma-1 OS=Zea mays OX=4577 GN=100280507 PE=2 SV=1	21.525	23.6	6	6	NaN	NaN	23.5544	NaN	NaN	24.0098	NaN	NaN	NaN	NaN	NaN	NaN	NaN	NaN	NaN	NaN		catalytic activity		6	23.6	23.6	46.565	948770000	42
tr|C0P6C5|C0P6C5_MAIZE Threonine synthase 1 chloroplastic OS=Zea mays OX=4577 GN=103630689 PE=2 SV=1	245.81	56.8	7	23	24.0495	24.5971	24.5366	NaN	NaN	NaN	NaN	NaN	23.665	NaN	NaN	24.4548	NaN	23.7862	24.8083	NaN	amine metabolic process;carboxylic acid metabolic process;cellular amine metabolic process;cellular amino acid metabolic process;cellular ketone metabolic process;cellular metabolic process;cellular nitrogen compound metabolic process;cellular process;metabolic process;nitrogen compound metabolic process;organic acid metabolic process;oxoacid metabolic process;primary metabolic process;small mole…	binding;cofactor binding;pyridoxal phosphate binding;vitamin B6 binding;vitamin binding		23	56.8	23.6	57.442	676760000	33
tr|C0P6L3|C0P6L3_MAIZE Pentatricopeptide repeat-containing protein PNM1 mitochondrial OS=Zea mays OX=4577 GN=100274849 PE=2 SV=1	5.7539	10.1	3	3	NaN	NaN	NaN	NaN	NaN	NaN	NaN	NaN	NaN	NaN	NaN	NaN	NaN	22.8425	NaN	NaN	biosynthetic process;cellular biosynthetic process;cellular macromolecule metabolic process;cellular metabolic process;cellular nitrogen compound biosynthetic process;cellular nitrogen compound metabolic process;cellular process;cellular protein metabolic process;cullin deneddylation;developmental process;heterocycle biosynthetic process;heterocycle metabolic process;macromolecule metabolic proce…	binding;nucleic acid binding;RNA binding	cell part;intracellular membrane-bounded organelle;intracellular organelle;intracellular part;membrane-bounded organelle;nucleus;organelle	3	10.1	10.1	53.985	298520000	21
sp|P31927|SPSA_MAIZE Sucrose-phosphate synthase OS=Zea mays OX=4577 GN=SPS PE=1 SV=1;tr|A0A1D6G664|A0A1D6G664_MAIZE Sucrose-phosphate synthase OS=Zea mays OX=4577 GN=542711 PE=3 SV=1	209.43	56	15	41	25.857	26.1703	26.3281	25.8695	26.4975	25.7388	27.3531	27.7157	28.048	28.0682	27.2063	27.1471	28.127	27.8782	25.5407	26.2723	biosynthetic process;carbohydrate biosynthetic process;carbohydrate metabolic process;cellular biosynthetic process;cellular carbohydrate biosynthetic process;cellular carbohydrate metabolic process;cellular metabolic process;cellular process;disaccharide biosynthetic process;disaccharide metabolic process;glycoside biosynthetic process;glycoside metabolic process;metabolic process;oligosaccharid…	catalytic activity;glucosyltransferase activity;sucrose-phosphate synthase activity;transferase activity;transferase activity, transferring glycosyl groups;transferase activity, transferring hexosyl groups;UDP-glucosyltransferase activity;UDP-glycosyltransferase activity		41	56	27.7	118.57	2038100000	70
tr|C0P7G8|C0P7G8_MAIZE Photosystem II repair protein PSB27-H1 chloroplastic OS=Zea mays OX=4577 GN=100282043 PE=2 SV=1;tr|B4FRJ4|B4FRJ4_MAIZE Photosystem II 11 kD protein OS=Zea mays OX=4577 GN=100281235 PE=2 SV=1	3.688	9.4	2	2	NaN	NaN	NaN	NaN	NaN	NaN	NaN	NaN	22.1235	NaN	NaN	NaN	NaN	NaN	NaN	NaN	cellular component assembly;cellular component assembly at cellular level;cellular component organization;cellular component organization at cellular level;cellular component organization or biogenesis;cellular component organization or biogenesis at cellular level;cellular macromolecular complex assembly;cellular macromolecular complex subunit organization;cellular process;cellular protein compl…			2	9.4	9.4	17.757	3611700	2
tr|C0P840|C0P840_MAIZE Lipoxygenase OS=Zea mays OX=4577 GN=100037803 PE=2 SV=1;tr|A0A1D6L0L2|A0A1D6L0L2_MAIZE Lipoxygenase OS=Zea mays OX=4577 GN=100037803 PE=3 SV=1;tr|A0A1D6L0K8|A0A1D6L0K8_MAIZE Lipoxygenase OS=Zea mays OX=4577 GN=100037803 PE=3 SV=1;tr|	323.31	64.3	35	58	NaN	23.2161	NaN	NaN	NaN	NaN	NaN	NaN	NaN	NaN	NaN	NaN	NaN	NaN	NaN	NaN	biosynthetic process;carboxylic acid biosynthetic process;carboxylic acid metabolic process;cellular biosynthetic process;cellular ketone metabolic process;cellular lipid metabolic process;cellular metabolic process;cellular process;fatty acid biosynthetic process;fatty acid metabolic process;lipid biosynthetic process;lipid metabolic process;metabolic process;monocarboxylic acid metabolic proces…	binding;catalytic activity;cation binding;dioxygenase activity;ion binding;metal ion binding;oxidoreductase activity;oxidoreductase activity, acting on single donors with incorporation of molecular oxygen;oxidoreductase activity, acting on single donors with incorporation of molecular oxygen, incorporation of two atoms of oxygen		58	64.3	49	100.36	5258200000	238
tr|K7U4K6|K7U4K6_MAIZE ATG8-interacting protein 1 OS=Zea mays OX=4577 GN=100191636 PE=4 SV=1	17.946	89.3	4	11	NaN	23.4944	24.187	24.602	25.8979	25.3697	NaN	24.7028	23.5141	23.9213	24.3032	23.9684	26.0896	24.6557	NaN	NaN	cellular macromolecule metabolic process;cellular metabolic process;cellular nitrogen compound metabolic process;cellular process;macromolecule metabolic process;metabolic process;ncRNA metabolic process;ncRNA processing;nitrogen compound metabolic process;nucleic acid metabolic process;nucleobase-containing compound metabolic process;primary metabolic process;RNA metabolic process;RNA processing…	binding;catalytic activity;methyltransferase activity;nucleic acid binding;RNA binding;transferase activity;transferase activity, transferring one-carbon groups		4	26.4	26.4	13.428	2182600000	92
tr|C0P9Q2|C0P9Q2_MAIZE Protein THYLAKOID FORMATION 1 chloroplastic OS=Zea mays OX=4577 GN=100382672 PE=2 SV=1	5.8057	26.8	3	7	23.7544	NaN	NaN	NaN	NaN	NaN	NaN	NaN	24.0127	NaN	NaN	NaN	NaN	NaN	NaN	NaN	cellular component organization;cellular component organization or biogenesis;cellular membrane organization;cellular metabolic process;cellular process;membrane organization;metabolic process;photosynthesis;plastid membrane organization;thylakoid membrane organization		cell part;intracellular part;macromolecular complex;membrane part;photosystem;photosystem II;protein complex;thylakoid part	3	14.1	14.1	31.923	53460000	8
tr|C0PAV3|C0PAV3_MAIZE Ubiquitin-fold modifier-conjugating enzyme 1 OS=Zea mays OX=4577 GN=ZEAMMB73_Zm00001d028450 PE=2 SV=1	4.6918	22.5	3	3	NaN	NaN	NaN	NaN	NaN	NaN	NaN	NaN	23.0032	NaN	NaN	24.3283	NaN	NaN	NaN	NaN	catabolic process;cellular catabolic process;cellular metabolic process;cellular process;establishment of localization;establishment of localization in cell;Golgi vesicle transport;intracellular transport;metabolic process;secondary metabolic process;toxin catabolic process;toxin metabolic process;transport;vesicle-mediated transport			3	22.5	22.5	20.319	78716000	11
tr|C0PC61|C0PC61_MAIZE Aldolase-type TIM barrel family protein OS=Zea mays OX=4577 GN=ZEAMMB73_Zm00001d042282 PE=2 SV=1;tr|A0A1D6N2L0|A0A1D6N2L0_MAIZE Aldolase-type TIM barrel family protein OS=Zea mays OX=4577 GN=ZEAMMB73_Zm00001d042282 PE=3 SV=1	4.6377	45.1	5	20	NaN	23.6823	NaN	NaN	NaN	NaN	NaN	NaN	NaN	NaN	NaN	NaN	NaN	NaN	NaN	NaN	alcohol catabolic process;alcohol metabolic process;carbohydrate catabolic process;carbohydrate metabolic process;catabolic process;cellular carbohydrate catabolic process;cellular carbohydrate metabolic process;cellular metabolic process;cellular nitrogen compound metabolic process;cellular process;coenzyme metabolic process;cofactor metabolic process;glucose catabolic process;glucose metabolic …	catalytic activity;sedoheptulose-7-phosphate:D-glyceraldehyde-3-phosphate glyceronetransferase activity;transferase activity;transferase activity, transferring aldehyde or ketonic groups	cell part;cytoplasm;intracellular part	5	17.4	17.4	46.22	127680000	13
tr|C0PCR1|C0PCR1_MAIZE Glycosyltransferase OS=Zea mays OX=4577 GN=100383065 PE=2 SV=1	2.5087	6.2	2	2	NaN	NaN	NaN	NaN	NaN	NaN	NaN	NaN	NaN	23.5081	NaN	NaN	NaN	NaN	NaN	NaN		catalytic activity;transferase activity;transferase activity, transferring glycosyl groups;transferase activity, transferring hexosyl groups		2	6.2	6.2	53.385	37192000	5
tr|C0PCX3|C0PCX3_MAIZE Tryptophan--tRNA ligase cytoplasmic OS=Zea mays OX=4577 GN=100282419 PE=2 SV=1;tr|A0A1D6L123|A0A1D6L123_MAIZE Tryptophan--tRNA ligase cytoplasmic OS=Zea mays OX=4577 GN=100282419 PE=3 SV=1;tr|A0A1D6L118|A0A1D6L118_MAIZE Tryptophan--t	85.91	19.4	6	6	NaN	24.2489	NaN	NaN	NaN	NaN	NaN	NaN	NaN	NaN	NaN	NaN	NaN	NaN	23.7081	NaN	amine metabolic process;amino acid activation;biosynthetic process;carboxylic acid metabolic process;cellular amine metabolic process;cellular amino acid metabolic process;cellular biosynthetic process;cellular ketone metabolic process;cellular macromolecule metabolic process;cellular metabolic process;cellular nitrogen compound biosynthetic process;cellular nitrogen compound metabolic process;ce…	adenyl nucleotide binding;adenyl ribonucleotide binding;aminoacyl-tRNA ligase activity;ATP binding;binding;catalytic activity;ligase activity;ligase activity, forming aminoacyl-tRNA and related compounds;ligase activity, forming carbon-oxygen bonds;nucleotide binding;purine nucleotide binding;purine ribonucleoside triphosphate binding;purine ribonucleotide binding;ribonucleotide binding;tryptopha…	cell part;cytoplasmic part;cytosol;intracellular part	6	19.4	19.4	46.146	402720000	14
tr|C0PDQ7|C0PDQ7_MAIZE Zinc finger CCCH domain-containing protein 58 OS=Zea mays OX=4577 GN=ZEAMMB73_Zm00001d008322 PE=2 SV=1;tr|A0A1D6FBY2|A0A1D6FBY2_MAIZE Zinc finger CCCH domain-containing protein 58 OS=Zea mays OX=4577 GN=ZEAMMB73_Zm00001d008322 PE=4 S	3.3187	14.6	2	4	NaN	NaN	NaN	NaN	NaN	NaN	NaN	NaN	NaN	NaN	NaN	NaN	NaN	NaN	NaN	20.4252		binding;cation binding;ion binding;metal ion binding		2	10.2	10.2	49.727	26681000	3
tr|C0PF66|C0PF66_MAIZE Peptidase M20/M25/M40 family protein OS=Zea mays OX=4577 GN=ZEAMMB73_Zm00001d037164 PE=2 SV=1	16.439	18.7	5	5	NaN	NaN	23.5783	NaN	NaN	24.2557	NaN	NaN	23.7731	NaN	NaN	NaN	NaN	NaN	NaN	NaN	amine metabolic process;carboxylic acid metabolic process;cellular amine metabolic process;cellular amino acid metabolic process;cellular ketone metabolic process;cellular metabolic process;cellular nitrogen compound metabolic process;cellular process;metabolic process;nitrogen compound metabolic process;organic acid metabolic process;oxoacid metabolic process;primary metabolic process;small mole…	aminoacylase activity;binding;catalytic activity;cation binding;hydrolase activity;hydrolase activity, acting on carbon-nitrogen (but not peptide) bonds;hydrolase activity, acting on carbon-nitrogen (but not peptide) bonds, in linear amides;ion binding;metal ion binding;metallopeptidase activity;peptidase activity;peptidase activity, acting on L-amino acid peptides	cell part;cytoplasm;intracellular part	5	18.7	18.7	48.332	525190000	31
tr|C0PFF5|C0PFF5_MAIZE Proteasome subunit beta OS=Zea mays OX=4577 GN=ZEAMMB73_Zm00001d033596 PE=2 SV=1	1.5914	19	3	3	NaN	NaN	NaN	NaN	NaN	NaN	NaN	NaN	NaN	NaN	NaN	23.7629	NaN	NaN	NaN	NaN	macromolecule metabolic process;metabolic process;primary metabolic process;protein metabolic process;proteolysis;proteolysis involved in cellular protein catabolic process	catalytic activity;endopeptidase activity;hydrolase activity;peptidase activity;peptidase activity, acting on L-amino acid peptides;threonine-type endopeptidase activity;threonine-type peptidase activity	cell part;cytoplasm;intracellular membrane-bounded organelle;intracellular organelle;intracellular part;macromolecular complex;membrane-bounded organelle;nucleus;organelle;proteasome core complex;protein complex	3	19	19	23.213	93839000	7
tr|C0PFX3|C0PFX3_MAIZE Phosphoribosylamine--glycine ligase chloroplastic OS=Zea mays OX=4577 GN=100383422 PE=2 SV=1;tr|A0A1D6FJ96|A0A1D6FJ96_MAIZE Phosphoribosylamine--glycine ligase chloroplastic OS=Zea mays OX=4577 GN=100383422 PE=3 SV=1;tr|A0A1D6FJ98|A0	3.4092	21.1	3	7	NaN	NaN	NaN	NaN	NaN	NaN	NaN	NaN	NaN	NaN	NaN	NaN	NaN	21.8477	NaN	22.1983	biosynthetic process;cellular aromatic compound metabolic process;cellular biosynthetic process;cellular metabolic process;cellular nitrogen compound biosynthetic process;cellular nitrogen compound metabolic process;cellular process;heterocycle metabolic process;metabolic process;nitrogen compound metabolic process;nucleobase biosynthetic process;nucleobase metabolic process;nucleobase-containing…	adenyl nucleotide binding;adenyl ribonucleotide binding;ATP binding;binding;catalytic activity;cation binding;ion binding;ligase activity;ligase activity, forming carbon-nitrogen bonds;metal ion binding;nucleotide binding;phosphoribosylamine-glycine ligase activity;purine nucleotide binding;purine ribonucleoside triphosphate binding;purine ribonucleotide binding;ribonucleotide binding		3	7.7	7.7	55.116	63289000	7
tr|C0PFZ6|C0PFZ6_MAIZE 1-aminocyclopropane-1-carboxylate oxidase2 OS=Zea mays OX=4577 GN=100382364 PE=2 SV=1	4.725	9.2	2	2	21.7162	NaN	NaN	NaN	NaN	NaN	NaN	NaN	NaN	NaN	NaN	NaN	NaN	NaN	NaN	NaN		binding;catalytic activity;cation binding;ion binding;metal ion binding;oxidoreductase activity;oxidoreductase activity, acting on paired donors, with incorporation or reduction of molecular oxygen;oxidoreductase activity, acting on paired donors, with incorporation or reduction of molecular oxygen, 2-oxoglutarate as one donor, and incorporation of one atom each of oxygen into both donors		2	9.2	9.2	36.437	13738000	2
tr|C0PH28|C0PH28_MAIZE 40S ribosomal protein S10-1 OS=Zea mays OX=4577 GN=ZEAMMB73_Zm00001d003672 PE=2 SV=1;tr|A0A1D6EAS0|A0A1D6EAS0_MAIZE 40S ribosomal protein S10-1 OS=Zea mays OX=4577 GN=ZEAMMB73_Zm00001d003672 PE=4 SV=1	27.748	49.2	3	9	NaN	NaN	NaN	NaN	NaN	22.1107	NaN	NaN	24.5989	NaN	NaN	21.909	NaN	NaN	NaN	NaN				8	49.2	21	20.227	47875000	4
tr|C0PHE3|C0PHE3_MAIZE Eucaryotic initiation factor4 OS=Zea mays OX=4577 GN=ZEAMMB73_Zm00001d014673 PE=2 SV=1;tr|A0A1D6GV12|A0A1D6GV12_MAIZE Eucaryotic initiation factor4 OS=Zea mays OX=4577 GN=ZEAMMB73_Zm00001d014673 PE=3 SV=1	323.31	75.8	2	39	NaN	NaN	NaN	NaN	NaN	NaN	NaN	NaN	NaN	NaN	NaN	NaN	NaN	NaN	24.7008	NaN		adenyl nucleotide binding;adenyl ribonucleotide binding;ATP binding;binding;catalytic activity;helicase activity;hydrolase activity;hydrolase activity, acting on acid anhydrides;hydrolase activity, acting on acid anhydrides, in phosphorus-containing anhydrides;nucleic acid binding;nucleoside-triphosphatase activity;nucleotide binding;purine nucleotide binding;purine ribonucleoside triphosphate bi…		39	75.8	4.6	46.952	1092400000	45
tr|C0PHH8|C0PHH8_MAIZE Phosphoglycerate mutase family protein OS=Zea mays OX=4577 GN=100192740 PE=2 SV=1;tr|A0A1D6EF20|A0A1D6EF20_MAIZE Phosphoglycerate mutase family protein OS=Zea mays OX=4577 GN=100192740 PE=4 SV=1	4.8065	16.7	2	2	NaN	23.7569	NaN	NaN	NaN	NaN	NaN	NaN	NaN	NaN	NaN	NaN	NaN	NaN	NaN	NaN				2	16.7	16.7	26.645	1339000000	14
tr|C0PHP0|C0PHP0_MAIZE Uncharacterized protein OS=Zea mays OX=4577 GN=100383614 PE=2 SV=1	11.178	14.8	7	7	NaN	NaN	23.9038	NaN	NaN	NaN	NaN	23.3762	NaN	NaN	NaN	NaN	NaN	NaN	NaN	NaN			cell part;chloroplast;cytoplasmic part;intracellular membrane-bounded organelle;intracellular organelle;intracellular part;membrane;membrane-bounded organelle;organelle;plasma membrane;plastid	7	14.8	14.8	67.835	676160000	42
tr|C0PJD4|C0PJD4_MAIZE 2Fe-2S ferredoxin-like superfamily protein OS=Zea mays OX=4577 GN=103625981 PE=2 SV=1;tr|A0A1D6GKB9|A0A1D6GKB9_MAIZE 2Fe-2S ferredoxin-like superfamily protein OS=Zea mays OX=4577 GN=103625981 PE=4 SV=1	4.5159	21.4	2	2	NaN	NaN	NaN	NaN	NaN	NaN	NaN	NaN	NaN	NaN	NaN	NaN	NaN	NaN	24.0044	24.4168	abscisic acid biosynthetic process;abscisic acid metabolic process;alcohol catabolic process;alcohol metabolic process;anatomical structure morphogenesis;apocarotenoid biosynthetic process;apocarotenoid metabolic process;biosynthetic process;carbohydrate catabolic process;carbohydrate metabolic process;carboxylic acid biosynthetic process;carboxylic acid metabolic process;catabolic process;cellul…	binding;cation binding;electron carrier activity;ion binding;iron-sulfur cluster binding;metal cluster binding;metal ion binding	cell part;chloroplast;cytoplasmic part;intracellular membrane-bounded organelle;intracellular organelle;intracellular part;membrane-bounded organelle;organelle;plastid	2	21.4	21.4	21.27	73639000	6
tr|Q546I4|Q546I4_MAIZE Tubulin alpha chain OS=Zea mays OX=4577 GN=tua5 PE=3 SV=1;sp|Q02245|TBA5_MAIZE Tubulin alpha-5 chain OS=Zea mays OX=4577 GN=TUBA5 PE=2 SV=1;sp|P33627|TBA6_MAIZE Tubulin alpha-6 chain OS=Zea mays OX=4577 GN=TUBA6 PE=2 SV=1;tr|C0PKT5|C	53.845	59.8	7	22	NaN	NaN	NaN	NaN	NaN	NaN	NaN	NaN	NaN	NaN	NaN	23.8075	NaN	NaN	NaN	NaN	cellular component assembly;cellular component assembly at cellular level;cellular component organization;cellular component organization at cellular level;cellular component organization or biogenesis;cellular component organization or biogenesis at cellular level;cellular macromolecular complex assembly;cellular macromolecular complex subunit organization;cellular process;cellular protein compl…	binding;catalytic activity;GTP binding;GTPase activity;guanyl nucleotide binding;guanyl ribonucleotide binding;hydrolase activity;hydrolase activity, acting on acid anhydrides;hydrolase activity, acting on acid anhydrides, in phosphorus-containing anhydrides;nucleoside-triphosphatase activity;nucleotide binding;purine nucleotide binding;purine ribonucleoside triphosphate binding;purine ribonucleo…	cell part;cytoplasm;cytoskeletal part;intracellular organelle part;intracellular part;macromolecular complex;microtubule;organelle part;protein complex	9	27.1	20	49.624	1187400000	33
tr|C0PLA6|C0PLA6_MAIZE ABC transporter G family member 3 OS=Zea mays OX=4577 GN=100384071 PE=2 SV=1;tr|A0A1D6LCF3|A0A1D6LCF3_MAIZE ABC transporter G family member 3 OS=Zea mays OX=4577 GN=100384071 PE=4 SV=1	21.819	21.7	5	5	NaN	NaN	22.2161	NaN	NaN	NaN	NaN	NaN	NaN	NaN	NaN	NaN	NaN	NaN	NaN	NaN				5	21.7	21.7	46.652	84590000	23
tr|C1JFF5|C1JFF5_MAIZE Carotene isomerase1 OS=Zea mays OX=4577 GN=CRTISO1 PE=2 SV=1	20.408	8.3	2	3	NaN	NaN	NaN	NaN	NaN	NaN	NaN	NaN	NaN	NaN	NaN	NaN	NaN	NaN	NaN	23.4847	biosynthetic process;carotenoid biosynthetic process;carotenoid metabolic process;cellular biosynthetic process;cellular lipid metabolic process;cellular metabolic process;cellular process;isoprenoid biosynthetic process;isoprenoid metabolic process;lipid biosynthetic process;lipid metabolic process;metabolic process;pigment biosynthetic process;pigment metabolic process;primary metabolic process…	catalytic activity;isomerase activity		2	6.6	6.6	63.669	57237000	3
tr|C4IZ74|C4IZ74_MAIZE Polyadenylate-binding protein 3 OS=Zea mays OX=4577 GN=100283584 PE=2 SV=1;tr|K7W511|K7W511_MAIZE Polyadenylate-binding protein 3 OS=Zea mays OX=4577 GN=100283584 PE=4 SV=1;tr|C0PMF8|C0PMF8_MAIZE Polyadenylate-binding protein 3 OS=Ze	9.2249	42.7	3	5	22.7661	NaN	NaN	NaN	NaN	NaN	NaN	NaN	NaN	NaN	NaN	22.4571	NaN	NaN	NaN	NaN		binding;nucleic acid binding;nucleotide binding		3	30.7	30.7	22.864	84543000	9
tr|C4J040|C4J040_MAIZE 3-hydroxy-3-methylglutaryl coenzyme A synthase OS=Zea mays OX=4577 GN=100384769 PE=2 SV=1;tr|A0A1D6JLF2|A0A1D6JLF2_MAIZE Hydroxymethylglutaryl-CoA synthase OS=Zea mays OX=4577 GN=100384769 PE=4 SV=1;tr|B6U9M4|B6U9M4_MAIZE 3-hydroxy-3	7.0482	12.9	2	5	NaN	NaN	NaN	NaN	22.6876	NaN	NaN	NaN	NaN	NaN	NaN	NaN	NaN	NaN	NaN	NaN	biosynthetic process;cellular biosynthetic process;cellular lipid metabolic process;cellular metabolic process;cellular process;isoprenoid biosynthetic process;isoprenoid metabolic process;lipid biosynthetic process;lipid metabolic process;metabolic process;primary metabolic process	catalytic activity;hydroxymethylglutaryl-CoA synthase activity;transferase activity;transferase activity, transferring acyl groups;transferase activity, transferring acyl groups, acyl groups converted into alkyl on transfer		2	6	6	51.81	115530000	15
tr|C4J0W6|C4J0W6_MAIZE Abscisic acid receptor PYR1 OS=Zea mays OX=4577 GN=100284319 PE=2 SV=1	13.338	61.3	6	11	NaN	23.845	NaN	NaN	NaN	24.0184	NaN	NaN	23.8299	NaN	NaN	24.8963	NaN	NaN	NaN	NaN				6	38.7	38.7	22.784	414080000	31
tr|C4J4W6|C4J4W6_MAIZE Os05g0597150-like protein OS=Zea mays OX=4577 GN=ZEAMMB73_Zm00001d037159 PE=2 SV=1	40.567	39.2	14	14	NaN	NaN	NaN	NaN	27.0428	NaN	NaN	26.8049	NaN	NaN	NaN	NaN	NaN	NaN	NaN	NaN	biological regulation;cellular component assembly;cellular component assembly at cellular level;cellular component organization;cellular component organization at cellular level;cellular component organization or biogenesis;cellular component organization or biogenesis at cellular level;cellular macromolecular complex assembly;cellular macromolecular complex subunit organization;cellular process;…	binding;DNA binding;nucleic acid binding	cell part;chromosomal part;intracellular membrane-bounded organelle;intracellular organelle;intracellular organelle part;intracellular part;macromolecular complex;membrane-bounded organelle;nucleosome;nucleus;organelle;organelle part;protein-DNA complex	14	39.2	39.2	63.205	5002600000	32
tr|C4J9R0|C4J9R0_MAIZE PLAT domain-containing protein 3 OS=Zea mays OX=4577 GN=ZEAMMB73_Zm00001d003457 PE=2 SV=1	7.1832	28.4	4	4	25.0698	NaN	NaN	23.8186	NaN	NaN	NaN	NaN	25.4147	NaN	NaN	NaN	NaN	NaN	25.2289	NaN				4	28.4	28.4	21.612	490470000	28
tr|C4JAW0|C4JAW0_MAIZE Plant UBX domain-containing protein 11 OS=Zea mays OX=4577 GN=100502378 PE=2 SV=1	29.498	20.6	3	3	21.9266	NaN	NaN	NaN	NaN	NaN	NaN	NaN	NaN	NaN	NaN	NaN	NaN	NaN	NaN	NaN				3	20.6	20.6	23.635	149990000	25
tr|C4JBB4|C4JBB4_MAIZE Co-chaperone protein SBA1 OS=Zea mays OX=4577 GN=100282592 PE=2 SV=1;tr|A0A1D6KQ94|A0A1D6KQ94_MAIZE Co-chaperone protein SBA1 OS=Zea mays OX=4577 GN=100282592 PE=4 SV=1	261.95	49.3	3	12	NaN	NaN	NaN	NaN	NaN	NaN	24.728	NaN	NaN	NaN	NaN	23.4538	NaN	NaN	NaN	NaN				12	49.3	21	22.044	360450000	35
tr|C4JBF5|C4JBF5_MAIZE 60S ribosomal protein L9-1 OS=Zea mays OX=4577 GN=ZEAMMB73_Zm00001d045577 PE=2 SV=1;tr|K7V7W7|K7V7W7_MAIZE 60S ribosomal protein L9-1 OS=Zea mays OX=4577 GN=ZEAMMB73_Zm00001d045577 PE=4 SV=1	4.3474	68.4	2	16	NaN	NaN	NaN	NaN	NaN	NaN	NaN	NaN	NaN	23.3652	NaN	NaN	NaN	NaN	NaN	NaN	biosynthetic process;cellular biosynthetic process;cellular macromolecule biosynthetic process;cellular macromolecule metabolic process;cellular metabolic process;cellular process;cellular protein metabolic process;macromolecule biosynthetic process;macromolecule metabolic process;metabolic process;primary metabolic process;protein metabolic process;translation	binding;nucleic acid binding;RNA binding;rRNA binding;structural constituent of ribosome;structural molecule activity	cell part;cytoplasmic part;intracellular non-membrane-bounded organelle;intracellular organelle;intracellular part;macromolecular complex;non-membrane-bounded organelle;organelle;ribonucleoprotein complex;ribosome	2	8.4	8.4	21.505	59599000	3
tr|C4JC17|C4JC17_MAIZE H/ACA ribonucleoprotein complex subunit 4 OS=Zea mays OX=4577 GN=100502498 PE=2 SV=1	67.821	43.6	4	20	NaN	NaN	NaN	NaN	NaN	NaN	NaN	22.6676	NaN	NaN	NaN	NaN	NaN	NaN	NaN	NaN	cellular macromolecule metabolic process;cellular metabolic process;cellular nitrogen compound metabolic process;cellular process;macromolecule metabolic process;macromolecule modification;metabolic process;nitrogen compound metabolic process;nucleic acid metabolic process;nucleobase-containing compound metabolic process;primary metabolic process;pseudouridine synthesis;RNA metabolic process;RNA …	binding;catalytic activity;intramolecular transferase activity;isomerase activity;nucleic acid binding;pseudouridine synthase activity;RNA binding		20	43.6	12.3	64.211	78519000	6
tr|C4JC55|C4JC55_MAIZE DUF724 domain-containing protein 2 OS=Zea mays OX=4577 GN=100285586 PE=2 SV=1	48.728	27.1	7	7	NaN	NaN	NaN	NaN	NaN	NaN	23.0122	23.1162	NaN	NaN	NaN	NaN	NaN	NaN	NaN	NaN	abscisic acid biosynthetic process;abscisic acid metabolic process;apocarotenoid biosynthetic process;apocarotenoid metabolic process;biosynthetic process;carboxylic acid biosynthetic process;carboxylic acid metabolic process;cellular biosynthetic process;cellular ketone metabolic process;cellular lipid metabolic process;cellular metabolic process;cellular process;isoprenoid biosynthetic process;…			7	27.1	27.1	49.586	197490000	20
tr|J7LC26|J7LC26_MAIZE Ribosomal protein S10 OS=Zea mays OX=4577 GN=ZEAMMB73_Zm00001d042023 PE=2 SV=1;tr|A0A1D6N0K5|A0A1D6N0K5_MAIZE Ribosomal protein S10 OS=Zea mays OX=4577 GN=ZEAMMB73_Zm00001d042023 PE=4 SV=1	79.198	41.9	3	9	NaN	23.8147	NaN	NaN	NaN	24.2026	NaN	NaN	25.5564	NaN	23.1576	23.3978	NaN	NaN	NaN	NaN			cell part;cytoplasmic part;intracellular non-membrane-bounded organelle;intracellular organelle;intracellular part;macromolecular complex;non-membrane-bounded organelle;organelle;ribonucleoprotein complex;ribosome	9	41.9	12.3	20.06	393810000	15
tr|K7TL05|K7TL05_MAIZE General regulatory factor2 OS=Zea mays OX=4577 GN=100279512 PE=3 SV=1;sp|Q01526|14332_MAIZE 14-3-3-like protein GF14-12 OS=Zea mays OX=4577 GN=GRF2 PE=2 SV=2;tr|A0A1D6J841|A0A1D6J841_MAIZE General regulatory factor2 OS=Zea mays OX=45	323.31	83.1	3	33	24.9634	25.5463	24.7295	NaN	NaN	25.778	NaN	NaN	24.3598	NaN	NaN	NaN	NaN	NaN	NaN	NaN				33	83.1	17.6	29.629	729560000	54
tr|K7TNS2|K7TNS2_MAIZE Polyadenylate-binding protein RBP45C OS=Zea mays OX=4577 GN=ZEAMMB73_Zm00001d026346 PE=4 SV=1;tr|K7U6V4|K7U6V4_MAIZE Polyadenylate-binding protein RBP45C OS=Zea mays OX=4577 GN=ZEAMMB73_Zm00001d026346 PE=4 SV=1;tr|A0A1D6JEW9|A0A1D6JE	10.845	43.2	3	10	23.2005	NaN	22.6471	NaN	NaN	NaN	NaN	NaN	NaN	NaN	NaN	NaN	NaN	NaN	NaN	NaN		binding;nucleic acid binding;nucleotide binding		3	16.7	16.7	36.018	276900000	29
tr|K7TSG0|K7TSG0_MAIZE DAG protein OS=Zea mays OX=4577 GN=ZEAMMB73_Zm00001d026307 PE=4 SV=1	2.2831	13	2	2	NaN	NaN	NaN	NaN	NaN	NaN	NaN	NaN	NaN	NaN	NaN	22.5169	NaN	NaN	NaN	NaN		binding;cation binding;cobalt ion binding;ion binding;metal ion binding;transition metal ion binding	cell part;cytoplasmic part;intracellular membrane-bounded organelle;intracellular organelle;intracellular part;membrane-bounded organelle;mitochondrion;organelle	2	13	13	27.27	44442000	7
tr|K7TUB1|K7TUB1_MAIZE Cytochrome b561 and DOMON domain-containing protein OS=Zea mays OX=4577 GN=103653190 PE=4 SV=1	2.0107	7.8	2	2	NaN	NaN	NaN	NaN	NaN	NaN	NaN	NaN	NaN	NaN	NaN	NaN	NaN	NaN	22.5829	NaN	metabolic process;oxidation-reduction process		cell part;integral to membrane;intrinsic to membrane;membrane part	2	7.8	7.8	41.346	33618000	2
tr|K7TVN3|K7TVN3_MAIZE Putative methyltransferase PMT15 OS=Zea mays OX=4577 GN=103641954 PE=4 SV=1;tr|A0A1D6Q6Y4|A0A1D6Q6Y4_MAIZE Putative methyltransferase PMT15 OS=Zea mays OX=4577 GN=101027245 PE=4 SV=1;tr|K7TZA6|K7TZA6_MAIZE Putative methyltransferase	2.5643	7.5	2	4	NaN	NaN	NaN	NaN	NaN	NaN	NaN	NaN	NaN	NaN	NaN	NaN	NaN	NaN	23.5335	NaN		catalytic activity;methyltransferase activity;transferase activity;transferase activity, transferring one-carbon groups		4	7.5	3.6	70.996	197850000	2
tr|K7TZ17|K7TZ17_MAIZE Glycosyltransferase OS=Zea mays OX=4577 GN=ZEAMMB73_Zm00001d048925 PE=3 SV=1	5.0097	17.3	4	4	NaN	NaN	24.4182	NaN	NaN	NaN	NaN	NaN	NaN	NaN	NaN	NaN	NaN	NaN	NaN	NaN		catalytic activity;transferase activity;transferase activity, transferring glycosyl groups;transferase activity, transferring hexosyl groups		4	17.3	17.3	52.797	54939000	4
tr|K7TZ96|K7TZ96_MAIZE Uncharacterized protein OS=Zea mays OX=4577 GN=103653901 PE=4 SV=1;tr|C0PEH0|C0PEH0_MAIZE Uncharacterized protein OS=Zea mays OX=4577 GN=100277288 PE=2 SV=1	6.4418	12.2	2	2	NaN	NaN	22.5476	NaN	NaN	NaN	NaN	NaN	NaN	22.4398	NaN	NaN	NaN	NaN	22.6834	NaN				2	12.2	12.2	39.267	30973000	5
tr|K7U3S1|K7U3S1_MAIZE Sucrose cleavage protein-like protein OS=Zea mays OX=4577 GN=ZEAMMB73_Zm00001d051650 PE=4 SV=1	9.9954	22.2	6	8	NaN	NaN	NaN	NaN	NaN	NaN	23.5531	23.6594	NaN	NaN	NaN	NaN	NaN	NaN	NaN	NaN				6	16.8	16.8	46.572	260930000	12
tr|K7U5W7|K7U5W7_MAIZE Wound/stress protein OS=Zea mays OX=4577 GN=100282651 PE=4 SV=1	4.2426	18.7	2	2	NaN	NaN	NaN	NaN	NaN	24.9376	NaN	NaN	24.5337	NaN	23.2316	NaN	NaN	NaN	NaN	NaN				2	18.7	18.7	19.606	540810000	24
tr|K7U915|K7U915_MAIZE Phosphoserine phosphatase chloroplastic OS=Zea mays OX=4577 GN=100285190 PE=4 SV=1	86.806	22	4	4	NaN	24.3427	23.949	NaN	NaN	22.5586	NaN	NaN	24.6534	NaN	NaN	25.1995	NaN	NaN	NaN	NaN	amine biosynthetic process;amine metabolic process;anatomical structure development;biosynthetic process;carboxylic acid biosynthetic process;carboxylic acid metabolic process;cellular amine metabolic process;cellular amino acid biosynthetic process;cellular amino acid metabolic process;cellular biosynthetic process;cellular ketone metabolic process;cellular metabolic process;cellular nitrogen co…	binding;calcium ion binding;catalytic activity;cation binding;hydrolase activity;hydrolase activity, acting on ester bonds;ion binding;magnesium ion binding;metal ion binding;phosphatase activity;phosphoric ester hydrolase activity;phosphoserine phosphatase activity		4	22	22	31.462	102340000	12
[truncated: 2,056 more rows]

## Sheet: S1b-Statistic and fold change
Supplemental Table S1b. Dataset, statistical analysis and fold change of proteins identified by shotgun-DDA analysis
					P0.05						P10						S0.05						S10		S0.05 versus P0.05				S10 versus P10				P10 versus P0.05				S10 versus S0.05
[truncated: 2,796 more rows]

## Sheet: S2
Supplemental Table S2. Fold change ratios, P-values and statistical significances of all significantly accumulated proteins classified by functional categories
[truncated: 367 more rows]
